# Supplementary material
Source: publisher figshare collection journal article supplement (https://acs.figshare.com/ndownloader/files/3853516)
Supplement: Supplementary file 1 [file 3853516]

data_Gray28
_audit_creation_date              2014-11-21
_audit_creation_method
;
Olex2 1.2-beta
(compiled 2014.11.20 svn.r3092 for OlexSys, GUI svn.r4947)
;
_publ_contact_author_address      ?
_publ_contact_author_email        ?
_publ_contact_author_name         ''
_publ_contact_author_phone        ?
_publ_section_references
;
Dolomanov, O.V., Bourhis, L.J., Gildea, R.J, Howard, J.A.K. & Puschmann, H.
 (2009), J. Appl. Cryst. 42, 339-341.

Sheldrick, G.M. (2008). Acta Cryst. A64, 112-122.
;
_chemical_name_common             ?
_chemical_name_systematic         ?
_chemical_formula_moiety          'C52 H32 F2 Ir2 N4 S4, 2(C6 H6)'
_chemical_formula_sum             'C64 H44 F2 Ir2 N4 S4'
_chemical_formula_weight          1419.67
_chemical_melting_point           ?
loop_
  _atom_type_symbol
  _atom_type_description
  _atom_type_scat_dispersion_real
  _atom_type_scat_dispersion_imag
  _atom_type_scat_source
 'C' 'C' 0.0033 0.0016 'International Tables Vol C Tables 4.2.6.8 and 6.1.1.4'
 'H' 'H' 0.0000 0.0000 'International Tables Vol C Tables 4.2.6.8 and 6.1.1.4'
 'F' 'F' 0.0171 0.0103 'International Tables Vol C Tables 4.2.6.8 and 6.1.1.4'
 'Ir' 'Ir' -1.4442 7.9887
 'International Tables Vol C Tables 4.2.6.8 and 6.1.1.4'
 'N' 'N' 0.0061 0.0033 'International Tables Vol C Tables 4.2.6.8 and 6.1.1.4'
 'S' 'S' 0.1246 0.1234 'International Tables Vol C Tables 4.2.6.8 and 6.1.1.4'

_shelx_space_group_comment
;
The symmetry employed for this shelxl refinement is uniquely defined
by the following loop, which should always be used as a source of
symmetry information in preference to the above space-group names.
They are only intended as comments.
;
_space_group_crystal_system       'tetragonal'
_space_group_IT_number            142
_space_group_name_H-M_alt         'I 41/a c d'
_space_group_name_Hall            '-I 4bd 2c'
loop_
  _space_group_symop_operation_xyz
 'x, y, z'
 '-y+1/4, x+3/4, z+1/4'
 '-x+1/2, -y, z+1/2'
 'y+1/4, -x+1/4, z+3/4'
 'x, -y, -z+1/2'
 'y+1/4, x+3/4, -z+3/4'
 '-x+1/2, y, -z'
 '-y+1/4, -x+1/4, -z+1/4'
 'x+1/2, y+1/2, z+1/2'
 '-y+3/4, x+5/4, z+3/4'
 '-x+1, -y+1/2, z+1'
 'y+3/4, -x+3/4, z+5/4'
 'x+1/2, -y+1/2, -z+1'
 'y+3/4, x+5/4, -z+5/4'
 '-x+1, y+1/2, -z+1/2'
 '-y+3/4, -x+3/4, -z+3/4'
 '-x, -y, -z'
 'y-1/4, -x-3/4, -z-1/4'
 'x-1/2, y, -z-1/2'
 '-y-1/4, x-1/4, -z-3/4'
 '-x, y, z-1/2'
 '-y-1/4, -x-3/4, z-3/4'
 'x-1/2, -y, z'
 'y-1/4, x-1/4, z-1/4'
 '-x+1/2, -y+1/2, -z+1/2'
 'y+1/4, -x-1/4, -z+1/4'
 'x, y+1/2, -z'
 '-y+1/4, x+1/4, -z-1/4'
 '-x+1/2, y+1/2, z'
 '-y+1/4, -x-1/4, z-1/4'
 'x, -y+1/2, z+1/2'
 'y+1/4, x+1/4, z+1/4'

_cell_length_a                    14.7816(5)
_cell_length_b                    14.7816(5)
_cell_length_c                    48.415(3)
_cell_angle_alpha                 90
_cell_angle_beta                  90
_cell_angle_gamma                 90
_cell_volume                      10578.5(10)
_cell_formula_units_Z             8
_cell_measurement_reflns_used     7615
_cell_measurement_temperature     100
_cell_measurement_theta_max       25.345
_cell_measurement_theta_min       2.756
_shelx_estimated_absorpt_T_max    0.676
_shelx_estimated_absorpt_T_min    0.365
_exptl_absorpt_coefficient_mu     5.239
_exptl_absorpt_correction_T_max   0.0439
_exptl_absorpt_correction_T_min   0.0206
_exptl_absorpt_correction_type    multi-scan
_exptl_absorpt_process_details
;
SADABS-2014/4 (Bruker,2014/4) was used for absorption correction.
wR2(int) was 0.0907 before and 0.0579 after correction.
The Ratio of minimum to maximum transmission is 0.4692.
The \l/2 correction factor is 0.00150.
;
_exptl_absorpt_special_details    ?
_exptl_crystal_colour             Orange
_exptl_crystal_colour_primary     Orange
_exptl_crystal_density_diffrn     1.783
_exptl_crystal_density_meas       ?
_exptl_crystal_density_method     ?
_exptl_crystal_description        Plate
_exptl_crystal_F_000              5536
_exptl_crystal_size_max           0.241
_exptl_crystal_size_mid           0.193
_exptl_crystal_size_min           0.081
_exptl_transmission_factor_max    ?
_exptl_transmission_factor_min    ?
_diffrn_reflns_av_R_equivalents   0.1036
_diffrn_reflns_av_unetI/netI      0.0286
_diffrn_reflns_Laue_measured_fraction_full 0.998
_diffrn_reflns_Laue_measured_fraction_max 0.998
_diffrn_reflns_limit_h_max        17
_diffrn_reflns_limit_h_min        -17
_diffrn_reflns_limit_k_max        17
_diffrn_reflns_limit_k_min        -17
_diffrn_reflns_limit_l_max        58
_diffrn_reflns_limit_l_min        -58
_diffrn_reflns_number             57578
_diffrn_reflns_point_group_measured_fraction_full 0.998
_diffrn_reflns_point_group_measured_fraction_max 0.998
_diffrn_reflns_theta_full         25.000
_diffrn_reflns_theta_max          25.381
_diffrn_reflns_theta_min          3.110
_diffrn_ambient_temperature       100.0
_diffrn_detector                  'Bruker APEX-II CCD'
_diffrn_detector_area_resol_mean  7.9
_diffrn_detector_type             'CCD Area Detector'
_diffrn_measured_fraction_theta_full 0.998
_diffrn_measured_fraction_theta_max 0.998
_diffrn_measurement_device        'Kappa Four-Circle Diffractometer'
_diffrn_measurement_device_type   'Bruker X8 APEX II'
_diffrn_measurement_method        '\w and \f scans'
_diffrn_radiation_monochromator   graphite
_diffrn_radiation_probe           X-ray
_diffrn_radiation_type            MoK\a
_diffrn_radiation_wavelength      0.71073
_diffrn_source                    'sealed tube'
_diffrn_source_type               fine-focus
_diffrn_standards_number          0
_reflns_Friedel_coverage          0.000
_reflns_Friedel_fraction_full     .
_reflns_Friedel_fraction_max      .
_reflns_number_gt                 1430
_reflns_number_total              2428
_reflns_special_details
;
 Reflections were merged by SHELXL according to the crystal
 class for the calculation of statistics and refinement.
 
 _reflns_Friedel_fraction is defined as the number of unique
 Friedel pairs measured divided by the number that would be
 possible theoretically, ignoring centric projections and
 systematic absences.
;
_reflns_threshold_expression      'I > 2\s(I)'
_computing_cell_refinement        'SAINT v8.34A (Bruker, 2013)'
_computing_data_collection        'APEX2 v2013.6-2 (Bruker, 2013)'
_computing_data_reduction         'SAINT v8.34A (Bruker, 2013)'
_computing_molecular_graphics     'Olex2 (Dolomanov et al., 2009)'
_computing_publication_material   'Olex2 (Dolomanov et al., 2009)'
_computing_structure_refinement   'ShelXL (Sheldrick, 2008)'
_computing_structure_solution     'ShelXT (Sheldrick, 2008)'
_refine_diff_density_max          1.053
_refine_diff_density_min          -0.620
_refine_diff_density_rms          0.103
_refine_ls_extinction_coef        .
_refine_ls_extinction_method      none
_refine_ls_goodness_of_fit_ref    1.077
_refine_ls_hydrogen_treatment     constr
_refine_ls_matrix_type            full
_refine_ls_number_parameters      174
_refine_ls_number_reflns          2428
_refine_ls_number_restraints      0
_refine_ls_R_factor_all           0.0718
_refine_ls_R_factor_gt            0.0318
_refine_ls_restrained_S_all       1.077
_refine_ls_shift/su_max           0.002
_refine_ls_shift/su_mean          0.000
_refine_ls_structure_factor_coef  Fsqd
_refine_ls_weighting_details
'w=1/[\s^2^(Fo^2^)+(0.0215P)^2^+62.1628P] where P=(Fo^2^+2Fc^2^)/3'
_refine_ls_weighting_scheme       calc
_refine_ls_wR_factor_gt           0.0549
_refine_ls_wR_factor_ref          0.0673
_refine_special_details           ?
_olex2_refinement_description
;
1. Fixed Uiso
 At 1.2 times of:
  All C(H) groups
2.a Aromatic/amide H refined with riding coordinates:
 C12(H12), C2(H2), C3(H3), C5(H5), C4(H4), C11(H11), C10(H10), C13(H13),
 C4S(H4S), C1S(H1S), C3S(H3S), C2S(H2S)
;
_atom_sites_solution_hydrogens    geom
_atom_sites_solution_primary      direct
_atom_sites_solution_secondary    difmap
loop_
  _atom_site_label
  _atom_site_type_symbol
  _atom_site_fract_x
  _atom_site_fract_y
  _atom_site_fract_z
  _atom_site_U_iso_or_equiv
  _atom_site_adp_type
  _atom_site_occupancy
  _atom_site_site_symmetry_order
  _atom_site_calc_flag
  _atom_site_refinement_flags_posn
  _atom_site_refinement_flags_adp
  _atom_site_refinement_flags_occupancy
  _atom_site_disorder_assembly
  _atom_site_disorder_group
 Ir1 Ir 0.5000 0.7500 0.58919(2) 0.01863(9) Uani 1 2 d S T P . .
 S1 S 0.64822(11) 0.50153(11) 0.56120(4) 0.0298(4) Uani 1 1 d . . . . .
 F1 F 0.43676(19) 0.68676(19) 0.6250 0.0220(9) Uani 1 2 d S T P . .
 N1 N 0.5927(3) 0.6474(3) 0.58510(9) 0.0209(10) Uani 1 1 d . . . . .
 C1 C 0.4379(4) 0.6749(4) 0.56111(12) 0.0207(12) Uani 1 1 d . . . . .
 C2 C 0.3527(4) 0.6881(4) 0.54905(13) 0.0269(15) Uani 1 1 d . . . . .
 H2 H 0.3198 0.7414 0.5534 0.032 Uiso 1 1 calc R . . . .
 C3 C 0.3153(4) 0.6262(4) 0.53118(13) 0.0270(15) Uani 1 1 d . . . . .
 H3 H 0.2572 0.6376 0.5236 0.032 Uiso 1 1 calc R . . . .
 C4 C 0.3610(4) 0.5466(4) 0.52398(13) 0.0300(16) Uani 1 1 d . . . . .
 H4 H 0.3344 0.5042 0.5117 0.036 Uiso 1 1 calc R . . . .
 C5 C 0.4453(4) 0.5312(4) 0.53513(13) 0.0286(15) Uani 1 1 d . . . . .
 H5 H 0.4781 0.4781 0.5304 0.034 Uiso 1 1 calc R . . . .
 C6 C 0.4822(4) 0.5944(4) 0.55343(12) 0.0218(14) Uani 1 1 d . . . . .
 C7 C 0.5687(4) 0.5851(4) 0.56685(13) 0.0243(14) Uani 1 1 d . . . . .
 C8 C 0.6813(4) 0.6339(4) 0.59467(12) 0.0214(14) Uani 1 1 d . . . . .
 C9 C 0.7216(4) 0.5543(4) 0.58415(13) 0.0238(15) Uani 1 1 d . . . . .
 C10 C 0.8049(4) 0.5273(4) 0.59305(13) 0.0287(16) Uani 1 1 d . . . . .
 H10 H 0.8312 0.4729 0.5863 0.034 Uiso 1 1 calc R . . . .
 C11 C 0.8501(4) 0.5803(4) 0.61191(14) 0.0332(16) Uani 1 1 d . . . . .
 H11 H 0.9076 0.5616 0.6186 0.040 Uiso 1 1 calc R . . . .
 C12 C 0.8124(4) 0.6613(4) 0.62142(14) 0.0289(16) Uani 1 1 d . . . . .
 H12 H 0.8458 0.6980 0.6339 0.035 Uiso 1 1 calc R . . . .
 C13 C 0.7277(4) 0.6889(4) 0.61304(13) 0.0242(14) Uani 1 1 d . . . . .
 H13 H 0.7020 0.7437 0.6196 0.029 Uiso 1 1 calc R . . . .
 C1S C 0.5000 0.2500 0.51191(19) 0.052(3) Uani 1 2 d S T P . .
 H1S H 0.5000 0.2500 0.4923 0.063 Uiso 1 2 calc RS T P . .
 C2S C 0.4212(6) 0.2675(5) 0.52619(17) 0.053(2) Uani 1 1 d . . . . .
 H2S H 0.3670 0.2802 0.5164 0.063 Uiso 1 1 calc R . . . .
 C3S C 0.4212(5) 0.2667(5) 0.55456(17) 0.050(2) Uani 1 1 d . . . . .
 H3S H 0.3669 0.2777 0.5645 0.060 Uiso 1 1 calc R . . . .
 C4S C 0.5000 0.2500 0.56846(19) 0.052(3) Uani 1 2 d S T P . .
 H4S H 0.5000 0.2500 0.5881 0.062 Uiso 1 2 calc RS T P . .

loop_
  _atom_site_aniso_label
  _atom_site_aniso_U_11
  _atom_site_aniso_U_22
  _atom_site_aniso_U_33
  _atom_site_aniso_U_23
  _atom_site_aniso_U_13
  _atom_site_aniso_U_12
 Ir1 0.0163(2) 0.0193(2) 0.02028(15) 0.000 0.000 -0.00029(16)
 S1 0.0265(8) 0.0270(8) 0.0360(10) -0.0079(8) 0.0002(8) 0.0050(7)
 F1 0.0219(13) 0.0219(13) 0.022(2) -0.0015(19) 0.0015(19) -0.0008(17)
 N1 0.019(3) 0.020(3) 0.024(3) 0.003(2) 0.003(2) 0.006(2)
 C1 0.022(3) 0.022(3) 0.018(3) 0.001(3) 0.004(3) -0.004(2)
 C2 0.024(3) 0.025(3) 0.032(4) 0.005(3) 0.007(3) 0.001(3)
 C3 0.020(3) 0.039(4) 0.022(4) 0.006(3) -0.002(3) -0.011(3)
 C4 0.027(4) 0.036(4) 0.027(4) -0.005(3) -0.003(3) -0.011(3)
 C5 0.035(4) 0.023(3) 0.029(4) -0.005(3) 0.004(3) -0.003(3)
 C6 0.019(4) 0.022(3) 0.024(3) -0.002(3) 0.005(3) -0.003(3)
 C7 0.026(3) 0.015(3) 0.032(4) -0.001(3) 0.006(3) 0.002(3)
 C8 0.020(3) 0.022(3) 0.022(4) 0.001(3) 0.001(3) -0.001(3)
 C9 0.022(3) 0.017(3) 0.032(4) -0.003(3) 0.003(3) -0.002(3)
 C10 0.020(3) 0.028(4) 0.037(4) 0.003(3) 0.002(3) 0.007(3)
 C11 0.020(3) 0.034(4) 0.045(4) 0.002(3) -0.003(3) 0.007(3)
 C12 0.023(3) 0.025(3) 0.039(5) 0.002(3) -0.006(3) -0.002(2)
 C13 0.023(3) 0.021(3) 0.028(4) -0.002(3) 0.002(3) 0.000(2)
 C1S 0.077(9) 0.046(7) 0.035(5) 0.000 0.000 -0.023(7)
 C2S 0.050(5) 0.055(6) 0.053(5) 0.003(4) -0.012(4) -0.008(4)
 C3S 0.053(5) 0.049(5) 0.049(5) -0.014(4) 0.004(4) -0.008(4)
 C4S 0.079(10) 0.041(7) 0.035(5) 0.000 0.000 -0.020(7)

_geom_special_details
;
 All esds (except the esd in the dihedral angle between two l.s. planes)
 are estimated using the full covariance matrix.  The cell esds are taken
 into account individually in the estimation of esds in distances, angles
 and torsion angles; correlations between esds in cell parameters are only
 used when they are defined by crystal symmetry.  An approximate (isotropic)
 treatment of cell esds is used for estimating esds involving l.s. planes.
;
loop_
  _geom_bond_atom_site_label_1
  _geom_bond_atom_site_label_2
  _geom_bond_distance
  _geom_bond_site_symmetry_2
  _geom_bond_publ_flag
 Ir1 F1 2.180(2) . ?
 Ir1 F1 2.180(2) 11_564 ?
 Ir1 N1 2.053(4) . ?
 Ir1 N1 2.053(4) 11_564 ?
 Ir1 C1 1.980(6) 11_564 ?
 Ir1 C1 1.980(6) . ?
 S1 C7 1.727(6) . ?
 S1 C9 1.738(6) . ?
 F1 Ir1 2.180(2) 14_445 ?
 N1 C7 1.325(7) . ?
 N1 C8 1.404(7) . ?
 C1 C6 1.409(8) . ?
 C2 C1 1.402(8) . ?
 C2 H2 0.9500 . ?
 C2 C3 1.375(8) . ?
 C3 H3 0.9500 . ?
 C3 C4 1.400(8) . ?
 C4 H4 0.9500 . ?
 C5 C4 1.378(9) . ?
 C5 H5 0.9500 . ?
 C5 C6 1.398(8) . ?
 C7 C6 1.441(8) . ?
 C8 C13 1.387(8) . ?
 C9 C8 1.414(8) . ?
 C9 C10 1.364(8) . ?
 C10 H10 0.9500 . ?
 C11 C10 1.376(9) . ?
 C11 H11 0.9500 . ?
 C12 C11 1.399(8) . ?
 C12 H12 0.9500 . ?
 C12 C13 1.378(8) . ?
 C13 H13 0.9500 . ?
 C1S H1S 0.9500 . ?
 C1S C2S 1.379(9) 11_554 ?
 C1S C2S 1.379(9) . ?
 C2S H2S 0.9500 . ?
 C3S C2S 1.374(10) . ?
 C3S H3S 0.9500 . ?
 C4S C3S 1.367(9) 11_554 ?
 C4S C3S 1.367(9) . ?
 C4S H4S 0.9500 . ?

loop_
  _geom_angle_atom_site_label_1
  _geom_angle_atom_site_label_2
  _geom_angle_atom_site_label_3
  _geom_angle
  _geom_angle_site_symmetry_1
  _geom_angle_site_symmetry_3
  _geom_angle_publ_flag
 F1 Ir1 F1 74.64(17) 11_564 . ?
 N1 Ir1 F1 96.16(13) . 11_564 ?
 N1 Ir1 F1 96.16(13) 11_564 . ?
 N1 Ir1 F1 92.65(13) . . ?
 N1 Ir1 F1 92.65(13) 11_564 11_564 ?
 N1 Ir1 N1 168.9(2) 11_564 . ?
 C1 Ir1 F1 170.00(18) . 11_564 ?
 C1 Ir1 F1 170.00(18) 11_564 . ?
 C1 Ir1 F1 96.14(18) 11_564 11_564 ?
 C1 Ir1 F1 96.14(18) . . ?
 C1 Ir1 N1 92.2(2) 11_564 . ?
 C1 Ir1 N1 80.2(2) 11_564 11_564 ?
 C1 Ir1 N1 80.2(2) . . ?
 C1 Ir1 N1 92.2(2) . 11_564 ?
 C1 Ir1 C1 93.3(3) . 11_564 ?
 C7 S1 C9 90.2(3) . . ?
 Ir1 F1 Ir1 105.36(17) . 14_445 ?
 C7 N1 Ir1 113.5(4) . . ?
 C7 N1 C8 111.8(5) . . ?
 C8 N1 Ir1 134.1(4) . . ?
 C2 C1 Ir1 128.7(5) . . ?
 C2 C1 C6 115.1(5) . . ?
 C6 C1 Ir1 116.1(4) . . ?
 C1 C2 H2 119.0 . . ?
 C3 C2 C1 122.1(6) . . ?
 C3 C2 H2 119.0 . . ?
 C2 C3 H3 119.3 . . ?
 C2 C3 C4 121.4(6) . . ?
 C4 C3 H3 119.3 . . ?
 C3 C4 H4 120.7 . . ?
 C5 C4 C3 118.6(6) . . ?
 C5 C4 H4 120.7 . . ?
 C4 C5 H5 120.3 . . ?
 C4 C5 C6 119.3(6) . . ?
 C6 C5 H5 120.3 . . ?
 C1 C6 C7 111.9(5) . . ?
 C5 C6 C1 123.5(5) . . ?
 C5 C6 C7 124.6(5) . . ?
 N1 C7 S1 114.9(4) . . ?
 N1 C7 C6 118.2(5) . . ?
 C6 C7 S1 126.9(5) . . ?
 N1 C8 C9 113.2(5) . . ?
 C13 C8 N1 126.2(5) . . ?
 C13 C8 C9 120.7(5) . . ?
 C8 C9 S1 109.9(4) . . ?
 C10 C9 S1 129.4(5) . . ?
 C10 C9 C8 120.7(5) . . ?
 C9 C10 H10 120.6 . . ?
 C9 C10 C11 118.8(6) . . ?
 C11 C10 H10 120.6 . . ?
 C10 C11 H11 119.6 . . ?
 C10 C11 C12 120.8(6) . . ?
 C12 C11 H11 119.6 . . ?
 C11 C12 H12 119.4 . . ?
 C13 C12 C11 121.2(6) . . ?
 C13 C12 H12 119.4 . . ?
 C8 C13 H13 121.1 . . ?
 C12 C13 C8 117.7(6) . . ?
 C12 C13 H13 121.1 . . ?
 C2S C1S H1S 120.1 11_554 . ?
 C2S C1S H1S 120.1 . . ?
 C2S C1S C2S 119.8(10) . 11_554 ?
 C1S C2S H2S 120.0 . . ?
 C3S C2S C1S 120.0(8) . . ?
 C3S C2S H2S 120.0 . . ?
 C2S C3S H3S 120.2 . . ?
 C4S C3S C2S 119.6(8) . . ?
 C4S C3S H3S 120.2 . . ?
 C3S C4S C3S 121.0(10) . 11_554 ?
 C3S C4S H4S 119.5 11_554 . ?
 C3S C4S H4S 119.5 . . ?

_shelx_res_file
;
    i41acd_l.res created by SHELXL-2014/7

TITL I41acd_l.res in I-4c2 New: I41/acd
CELL 0.71073 14.7816 14.7816 48.415 90 90 90
ZERR 8 0.0005 0.0005 0.003 0 0 0
LATT 2
SYMM 0.25-Y,0.75+X,0.25+Z
SYMM 0.5-X,-Y,0.5+Z
SYMM 0.25+Y,0.25-X,0.75+Z
SYMM +X,-Y,0.5-Z
SYMM 0.25+Y,0.75+X,0.75-Z
SYMM 0.5-X,+Y,-Z
SYMM 0.25-Y,0.25-X,0.25-Z
SFAC C H F Ir N S
UNIT 512 352 16 16 32 32

L.S. 10
PLAN  -20
SIZE 0.241 0.193 0.081
TEMP -173.15
BOND $H
fmap 2
acta 50
OMIT 1 1 2
OMIT 0 0 4
OMIT 0 2 0
OMIT 0 2 4
OMIT 0 2 2
REM <olex2.extras>
REM <HklSrc "%D:\\frames\\guest\\tgray28\\work\\gray28_0m.hkl">
REM </olex2.extras>

WGHT    0.021500   62.162800
FVAR       0.05979
IR1   4    0.500000    0.750000    0.589188    10.50000    0.01628    0.01933 =
         0.02028    0.00000    0.00000   -0.00029
S1    6    0.648216    0.501531    0.561199    11.00000    0.02645    0.02703 =
         0.03599   -0.00792    0.00025    0.00502
F1    3    0.436764    0.686764    0.625000    10.50000    0.02188    0.02188 =
         0.02222   -0.00149    0.00149   -0.00076
N1    5    0.592650    0.647445    0.585095    11.00000    0.01934    0.01977 =
         0.02362    0.00308    0.00323    0.00550
C9    1    0.721604    0.554282    0.584148    11.00000    0.02231    0.01705 =
         0.03218   -0.00300    0.00285   -0.00239
C12   1    0.812405    0.661283    0.621419    11.00000    0.02306    0.02485 =
         0.03894    0.00236   -0.00610   -0.00151
AFIX  43
H12   2    0.845828    0.697968    0.633887    11.00000   -1.20000
AFIX   0
C2    1    0.352700    0.688077    0.549049    11.00000    0.02352    0.02549 =
         0.03167    0.00532    0.00682    0.00094
AFIX  43
H2    2    0.319756    0.741427    0.553356    11.00000   -1.20000
AFIX   0
C1    1    0.437925    0.674934    0.561115    11.00000    0.02184    0.02222 =
         0.01805    0.00149    0.00374   -0.00415
C3    1    0.315281    0.626177    0.531176    11.00000    0.02022    0.03907 =
         0.02161    0.00591   -0.00185   -0.01132
AFIX  43
H3    2    0.257180    0.637636    0.523553    11.00000   -1.20000
AFIX   0
C5    1    0.445328    0.531182    0.535131    11.00000    0.03458    0.02272 =
         0.02853   -0.00511    0.00356   -0.00316
AFIX  43
H5    2    0.478130    0.478105    0.530428    11.00000   -1.20000
AFIX   0
C8    1    0.681268    0.633885    0.594673    11.00000    0.02022    0.02201 =
         0.02187    0.00148    0.00105   -0.00071
C7    1    0.568651    0.585079    0.566849    11.00000    0.02589    0.01547 =
         0.03166   -0.00069    0.00570    0.00192
C6    1    0.482159    0.594356    0.553435    11.00000    0.01883    0.02234 =
         0.02432   -0.00153    0.00503   -0.00258
C4    1    0.360995    0.546644    0.523980    11.00000    0.02692    0.03620 =
         0.02679   -0.00488   -0.00295   -0.01147
AFIX  43
H4    2    0.334421    0.504240    0.511668    11.00000   -1.20000
AFIX   0
C11   1    0.850095    0.580273    0.611914    11.00000    0.01988    0.03448 =
         0.04521    0.00218   -0.00253    0.00660
AFIX  43
H11   2    0.907606    0.561597    0.618563    11.00000   -1.20000
AFIX   0
C10   1    0.804905    0.527271    0.593048    11.00000    0.02047    0.02812 =
         0.03744    0.00285    0.00246    0.00723
AFIX  43
H10   2    0.831224    0.472898    0.586350    11.00000   -1.20000
AFIX   0
C13   1    0.727719    0.688876    0.613040    11.00000    0.02302    0.02127 =
         0.02819   -0.00234    0.00215   -0.00015
AFIX  43
H13   2    0.702024    0.743702    0.619619    11.00000   -1.20000
AFIX   0

C4S   1    0.500000    0.250000    0.568458    10.50000    0.07926    0.04056 =
         0.03543    0.00000    0.00000   -0.01982
AFIX  43
H4S   2    0.500003    0.250001    0.588080    10.50000   -1.20000
AFIX   0
C1S   1    0.500000    0.250000    0.511911    10.50000    0.07734    0.04557 =
         0.03455    0.00000    0.00000   -0.02269
AFIX  43
H1S   2    0.500002    0.250000    0.492289    10.50000   -1.20000
AFIX   0
C3S   1    0.421239    0.266727    0.554561    11.00000    0.05334    0.04867 =
         0.04855   -0.01394    0.00410   -0.00812
AFIX  43
H3S   2    0.366854    0.277719    0.564464    11.00000   -1.20000
AFIX   0
C2S   1    0.421237    0.267539    0.526187    11.00000    0.05025    0.05457 =
         0.05338    0.00257   -0.01213   -0.00835
AFIX  43
H2S   2    0.366973    0.280183    0.516407    11.00000   -1.20000
AFIX   0
HKLF 4

REM  I41acd_l.res in I-4c2 New: I41/acd
REM R1 =  0.0318 for    1430 Fo > 4sig(Fo)  and  0.0718 for all    2428 data
REM    174 parameters refined using      0 restraints

END

WGHT      0.0215     62.1549

REM Highest difference peak  1.053,  deepest hole -0.620,  1-sigma level  0.103
Q1    1   0.5000  0.7500  0.5687  10.50000  0.05    1.05
Q2    1   0.5000  0.7500  0.6095  10.50000  0.05    1.02
Q3    1   0.4626  0.7901  0.5995  11.00000  0.05    0.64
Q4    1   0.5016  0.6853  0.5881  11.00000  0.05    0.55
Q5    1   0.5606  0.7753  0.5869  11.00000  0.05    0.52
Q6    1   0.4629  0.7871  0.6250  10.50000  0.05    0.43
Q7    1   0.6028  0.5401  0.5652  11.00000  0.05    0.40
Q8    1   0.5311  0.5988  0.5515  11.00000  0.05    0.38
Q9    1   0.4738  0.5798  0.5358  11.00000  0.05    0.38
Q10   1   0.5534  0.2783  0.5206  11.00000  0.05    0.37
Q11   1   0.6460  0.5092  0.5454  11.00000  0.05    0.36
Q12   1   0.4862  0.2866  0.5575  11.00000  0.05    0.33
Q13   1   0.3712  0.6012  0.5255  11.00000  0.05    0.31
Q14   1   0.5000  0.2500  0.5509  10.50000  0.05    0.31
Q15   1   0.7035  0.7270  0.6145  11.00000  0.05    0.31
Q16   1   0.7763  0.6785  0.6092  11.00000  0.05    0.30
Q17   1   0.5828  0.6194  0.5322  11.00000  0.05    0.30
Q18   1   0.4542  0.2985  0.5205  11.00000  0.05    0.29
Q19   1   0.5281  0.2699  0.5984  11.00000  0.05    0.29
Q20   1   0.4626  0.4518  0.5403  11.00000  0.05    0.29
;
_shelx_res_checksum               30544
_shelx_hkl_file
;
  -1  -1   0 -13.354 2.99711   2
  -1  -1   0 -18.715 3.58834   3
  -1  -1   0 -17.289 2.32478   5
  -1   1   0 -10.841 3.60832   1
  -1   1   0 -15.032 2.17270   2
  -1   1   0 -11.445 2.68178   4
   1  -1   0 -8.6022 3.69191   1
   1  -1   0 -12.190 1.88843   2
   1  -1   0 -15.536 3.72505   4
   1   1   0 -17.325 3.16938   2
   1   1   0 -17.017 4.22673   2
   1   1   0 -16.270 3.24259   3
   1   1   0 -17.663 2.07510   5
  -1  -1   0 -13.486 4.25310   2
  -2   0   0 1959.71 74.5804   2
  -2  -2   0 9823.67 349.825   2
  -2   2   0 9092.32 348.655   4
  -2   2   0 9164.10 345.506   2
  -2   2   0 8976.78 348.525   1
  -2   2   0 9275.83 345.600   2
   2  -2   0 8953.40 345.249   2
  -2  -2   0 9487.40 348.827   3
  -2  -2   0 9999.99 347.713   5
   2   2   0 9247.82 347.000   5
   2  -2   0 9217.47 348.922   4
   2   2   0 9168.55 348.760   2
   2   2   0 9734.34 348.994   3
   3   1   0 3.00215 10.5350   4
  -1  -3   0 5.25549 11.4983   2
  -1  -3   0 5.94283 10.6887   3
  -3  -1   0 -12.320 8.87803   2
  -3  -1   0 3.20821 8.81827   2
  -3  -1   0 3.26782 7.80692   3
   1   3   0 1.55894 9.79255   3
  -3  -1   0 -4.8788 9.81638   4
   1  -3   0 -9.4857 9.40358   3
   1  -3   0 -6.0634 8.97283   4
   3   1   0 -6.3656 9.02350   2
   3   1   0 -8.8536 9.41986   3
   1   3   0 20.3503 10.6364   5
   3  -1   0 -6.2251 4.77413   2
  -3   1   0 2.64142 6.35811   3
  -3  -1   0 -4.3616 5.30194   5
  -1   3   0 -4.4327 13.1221   1
  -1   3   0 1.01769 9.50261   2
  -1   3   0 -24.811 9.77226   2
  -1   3   0 -2.4481 9.39254   3
   1  -3   0 0.08138 8.44405   2
   3  -1   0 -6.8738 4.42157   2
   3  -1   0 5.16504 10.8793   4
  -1  -3   0 -3.8855 9.75006   5
  -3   1   0 -5.0019 5.54547   2
  -3   1   0 12.9606 8.48018   2
   1   3   0 -13.860 10.0640   1
  -3   1   0 -5.1978 9.00327   4
   3   1   0 -3.2836 2.98912   5
   3   1   0 -1.9355 4.05986   5
   1   3   0 -14.749 10.7776   2
  -3  -3   0 5.56539 13.0205   2
   3  -3   0 -2.7382 2.39845   2
  -3   3   0 -12.986 8.42444   2
   3   3   0 -4.7343 10.2105   5
  -3   3   0 -5.7460 10.6822   4
  -3   3   0 -9.4894 7.46127   3
  -3  -3   0 -4.4669 8.10089   4
   3   3   0 -12.371 12.0696   2
   3  -3   0 12.0262 14.6603   4
  -3   3   0 -1.0620 8.78684   2
  -3   3   0 -12.589 13.2980   1
  -3  -3   0 -6.7431 9.70551   5
  -3  -3   0 17.1523 13.8471   3
   0   4   0 4226.22 164.655   1
   0  -4   0 4236.63 164.538   3
   4   0   0 4226.93 165.284   4
  -4   0   0 4283.36 160.678   3
   4   0   0 4356.64 160.962   3
   0   4   0 4183.94 165.096   2
  -4   0   0 4286.54 160.376   2
  -4   0   0 4232.97 160.146   2
   0   4   0 3945.68 162.170   5
  -4   0   0 4341.50 165.327   4
   0  -4   0 4180.23 164.976   2
  -4  -2   0 6022.14 230.451   2
   2   4   0 6279.46 230.684   5
   2  -4   0 5846.27 228.801   2
  -2   4   0 6222.78 229.504   2
   2   4   0 6023.81 232.836   2
  -4  -2   0 6274.37 230.054   4
   4  -2   0 5762.36 232.046   4
  -2  -4   0 5847.92 232.903   2
  -2  -4   0 5684.04 231.334   3
  -4   2   0 6160.92 225.401   2
  -2   4   0 5971.22 229.254   2
  -2   4   0 6397.63 229.121   3
   4   2   0 6188.13 230.340   2
  -2   4   0 6084.28 230.463   4
   2  -4   0 5904.97 228.326   3
   4   2   0 5710.45 229.208   4
  -4   2   0 6269.66 232.842   4
  -4  -2   0 6192.30 227.524   5
   2   4   0 5990.48 231.878   1
  -4   2   0 5877.19 226.288   2
  -4  -2   0 5915.17 229.966   3
   2  -4   0 5995.66 230.204   4
  -2   4   0 5764.58 232.640   1
  -4  -2   0 6369.79 230.826   2
  -4   4   0 2427.41 94.3315   3
  -4   4   0 2406.58 101.371   1
  -4   4   0 2386.63 94.8644   2
   4  -4   0 2351.44 101.453   4
   4   4   0 2318.73 96.7534   5
  -4  -4   0 2367.97 101.756   2
  -4  -4   0 2373.79 101.053   3
  -4  -4   0 2322.35 95.8185   4
   4   4   0 2387.20 101.095   2
  -4   4   0 2416.41 94.9374   2
   1   5   0 -8.2087 10.4447   5
   5  -1   0 -11.201 7.60486   2
  -5  -1   0 5.47655 10.4758   2
  -5  -1   0 -10.009 13.8374   4
  -1   5   0 -19.999 12.8802   1
   5   1   0 -7.3563 14.1123   4
   1   5   0 -7.1288 15.5530   1
  -1  -5   0 -22.995 15.5975   3
   1  -5   0 -2.4844 13.2571   3
   1   5   0 -0.4425 17.1580   2
  -5  -1   0 -2.0269 10.5365   3
  -1   5   0 10.1610 12.4598   2
  -1   5   0 -5.4040 10.3919   5
   1  -5   0 -13.086 14.3878   2
   1  -5   0 8.17407 10.7008   4
  -5   1   0 6.27437 7.53082   3
   5  -1   0 -3.7146 13.4750   4
  -5   1   0 26.9991 18.0057   4
  -1  -5   0 -16.822 13.6498   2
  -5  -1   0 0.48666 10.5965   2
  -5  -1   0 -14.170 5.49293   5
  -5   1   0 -4.3963 8.08706   2
  -5   1   0 -15.689 6.84906   2
   5   1   0 -2.1757 9.72335   2
  -5  -3   0 -13.884 11.3822   4
  -5  -3   0 -2.9347 11.2337   3
  -3  -5   0 -35.527 13.6536   2
   3   5   0 -3.2017 14.7186   2
  -3  -5   0 11.7657 16.4885   3
   5  -3   0 -5.7617 13.7559   4
  -5   3   0 -1.9610 8.26036   2
   5   3   0 5.23881 7.60384   5
   3  -5   0 -10.103 11.1943   4
  -5  -3   0 10.0703 10.1924   5
   5   3   0 -12.467 14.5877   2
  -5   3   0 1.72348 8.25787   2
  -5   3   0 5.43458 15.5685   1
  -5  -3   0 -1.6912 15.0660   2
   3  -5   0 6.89477 10.9423   2
  -3   5   0 5.74205 11.8184   2
  -3   5   0 4.37647 13.8749   4
   3   5   0 7.53571 11.1483   5
   5  -3   0 7.66669 5.98293   2
  -3   5   0 -2.3523 16.5668   1
  -5  -5   0 12.8841 14.4465   3
   5   5   0 -21.785 13.6344   2
   5  -5   0 -5.7007 13.1132   4
  -5   5   0 -10.803 15.9834   1
  -5  -5   0 -12.018 14.2207   2
   5  -5   0 0.37768 5.73859   2
  -5  -5   0 -13.400 9.56466   4
  -5   5   0 -8.0053 10.0561   2
  -5   5   0 7.70716 9.45842   2
   5   5   0 -12.994 11.3939   5
   0   6   0 3295.25 135.016   1
   0   6   0 3259.30 133.502   5
   0  -6   0 3216.75 135.414   3
   6   0   0 3205.45 136.484   4
   0  -6   0 3359.71 136.752   2
  -6   0   0 3469.30 130.113   2
   0   6   0 3407.11 136.924   2
  -6   0   0 3329.33 129.955   2
  -6   0   0 3351.90 130.030   3
   2   6   0 2940.14 125.791   5
   2  -6   0 3124.03 126.561   2
  -6  -2   0 3311.28 126.999   2
  -6   2   0 3060.24 119.726   3
   6  -2   0 3214.88 116.179   2
  -2  -6   0 3072.82 130.235   2
  -2  -6   0 2854.00 127.837   3
   2  -6   0 3077.69 125.454   3
   6  -2   0 2968.72 128.816   4
  -2   6   0 3088.17 126.448   2
   6   2   0 3152.63 127.793   4
  -6  -2   0 3186.16 121.365   5
  -2   6   0 3141.20 130.205   1
  -6  -2   0 3054.55 124.905   3
  -6  -2   0 3062.59 125.484   2
  -2   6   0 3132.66 123.075   5
  -6   2   0 3308.40 120.827   2
  -6   2   0 3106.34 120.786   2
   2  -6   0 3097.31 125.332   4
   2   6   0 2973.59 128.550   1
   2   6   0 3029.04 129.865   2
   6   2   0 3099.80 125.090   2
  -6  -4   0 4430.35 182.035   2
  -6  -4   0 4852.44 179.530   4
   4   6   0 4338.20 179.075   5
   6   4   0 4652.54 181.560   2
   6  -4   0 4529.93 183.785   4
  -6   4   0 4435.18 173.087   2
   4  -6   0 4606.88 182.349   4
   4   6   0 4486.99 184.536   2
  -6   4   0 4574.71 173.636   2
   4  -6   0 4465.05 176.571   2
  -4  -6   0 4489.68 183.579   3
  -4   6   0 4522.39 185.826   1
   6   4   0 4555.09 174.631   5
  -4   6   0 4594.80 178.131   2
  -4   6   0 4559.85 177.896   2
  -6   4   0 4445.37 183.348   1
  -4  -6   0 4450.04 185.067   2
   6  -4   0 4817.60 170.526   2
  -6  -4   0 4476.57 181.223   3
  -6   6   0 1766.90 76.8044   2
  -6  -6   0 1734.16 83.7979   3
  -6  -6   0 1791.44 78.1994   4
   6  -6   0 1836.35 85.2323   4
  -6  -6   0 1755.77 85.6631   2
   6   6   0 1866.43 86.8276   2
  -6   6   0 1836.26 77.1127   2
  -6   6   0 1726.77 87.4245   1
   6   6   0 1901.04 79.5473   5
  -1  -7   0 -13.349 13.6878   3
   1  -7   0 21.5376 12.7682   4
  -1  -7   0 -14.652 17.1456   2
   7   1   0 6.79993 13.3202   4
   1   7   0 -12.381 11.9037   5
  -7  -1   0 3.73273 5.88598   5
  -1   7   0 0.43419 16.7046   1
  -7  -1   0 -16.419 11.9621   2
   7   1   0 1.62497 11.0331   2
   1  -7   0 -4.7753 11.7407   3
   1   7   0 -16.280 13.8273   2
   7  -1   0 6.85900 8.73837   2
   1  -7   0 -22.070 15.1154   2
  -7  -1   0 -13.824 10.8650   3
  -7   1   0 2.97558 7.78456   2
  -7   1   0 0.46186 7.86380   3
   7  -1   0 1.48267 13.9659   4
  -1   7   0 18.7028 13.2206   5
   1   7   0 6.30990 16.5242   1
  -7  -1   0 -12.658 10.9748   2
  -7   1   0 -28.038 8.79633   2
  -1   7   0 40.0066 18.1165   2
   3  -7   0 -4.8135 12.7279   2
   3   7   0 -21.011 13.9775   1
   7   3   0 -8.4900 14.6962   4
  -7   3   0 2.15132 9.29095   2
  -3  -7   0 2.73439 14.3722   3
   3   7   0 -25.748 14.0720   5
   3   7   0 -8.2077 15.4030   2
  -3   7   0 -5.9354 13.5796   2
  -3  -7   0 3.37011 15.7847   2
  -7   3   0 3.89270 11.1588   2
   7   3   0 1.14465 13.7628   2
  -7  -3   0 7.36919 15.0162   2
   3  -7   0 14.1087 14.4227   4
  -7  -3   0 6.85818 13.9933   3
  -3   7   0 -9.8891 9.49584   5
   7  -3   0 -4.2563 14.5856   4
  -7   3   0 -12.028 7.22899   3
  -3   7   0 3.66743 18.6666   1
  -5   7   0 -12.192 12.5873   2
  -5  -7   0 4.05898 10.4906   4
  -7  -5   0 4.14693 16.8953   2
  -5   7   0 0.87498 11.5660   2
  -7   5   0 1.38689 8.89625   2
  -7  -5   0 3.84713 15.7478   3
   5   7   0 -26.623 18.9653   2
   7   5   0 -1.5662 9.73131   5
   7  -5   0 18.0290 16.2332   4
  -7   5   0 9.74719 14.8972   1
  -5  -7   0 18.2415 16.6218   2
  -5  -7   0 25.9835 19.3296   3
  -5   7   0 -15.060 14.9515   1
   5  -7   0 -14.877 12.9323   4
   7   5   0 15.0451 14.5527   2
   5  -7   0 9.70844 11.6373   2
  -7   5   0 15.7366 10.2400   2
   5   7   0 6.39680 13.9521   5
   7  -7   0 24.6917 17.1236   4
   7   7   0 2.76958 11.4947   5
  -7  -7   0 35.9774 20.2452   2
  -7   7   0 14.9911 10.1018   2
  -7   7   0 -19.096 19.0884   1
   7   7   0 1.64763 19.3858   2
  -7  -7   0 -2.9639 15.2423   3
  -7   7   0 16.6414 12.1930   2
   7  -7   0 14.9453 8.84695   2
   0   8   0 2063.70 92.5281   2
   0   8   0 2037.38 90.2029   1
  -8   0   0 2143.81 84.2952   2
   0   8   0 1969.47 88.5191   5
   0  -8   0 2001.82 91.8480   2
  -8   0   0 1949.92 76.0757   5
  -8   0   0 1982.34 76.4631   5
  -8   0   0 1939.58 83.3114   3
  -8   0   0 2045.88 84.2701   2
   0  -8   0 1944.74 90.4551   3
   8   0   0 2016.94 92.8123   4
   0  -8   0 1955.75 84.0341   4
   2  -8   0 2159.91 92.3899   4
  -2   8   0 2248.54 97.1058   2
  -2   8   0 2090.87 91.9191   5
   2  -8   0 2063.00 95.3317   2
   2   8   0 2162.00 96.6910   1
   2   8   0 2155.06 95.3024   5
  -8   2   0 2193.95 87.8625   2
   8   2   0 2165.76 97.0868   4
   2  -8   0 2038.64 93.9560   3
  -8   2   0 2228.26 86.7086   3
   2   8   0 2001.07 97.9458   2
  -2   8   0 2226.89 98.5820   1
  -2  -8   0 2244.68 98.2309   3
  -8   2   0 2205.79 86.4689   2
  -8  -2   0 2193.90 92.9714   2
  -8  -2   0 2297.93 88.1222   5
   8   2   0 2071.57 91.0157   2
  -8  -2   0 2022.71 91.3256   3
  -2  -8   0 1917.13 97.4364   2
   8  -2   0 2205.80 98.8035   4
   8   4   0 2405.41 89.6497   5
   4   8   0 2387.46 109.266   2
  -4  -8   0 2334.44 109.272   2
   8   4   0 2413.53 103.200   2
   4   8   0 2482.83 104.072   5
  -8  -4   0 2463.33 103.614   3
  -8   4   0 2060.07 96.6685   2
   8  -4   0 2311.76 107.806   4
  -8   4   0 2336.36 106.464   1
  -4   8   0 2292.34 101.861   2
  -4   8   0 2226.60 97.4574   5
  -8   4   0 2389.88 94.1165   2
  -8  -4   0 2365.03 103.734   2
  -4  -8   0 2386.65 108.007   3
   4  -8   0 2428.24 104.390   4
  -4   8   0 2356.61 109.619   1
  -8   4   0 2362.02 93.9635   3
   4  -8   0 2498.61 101.656   2
  -8   6   0 3012.54 135.060   1
  -6  -8   0 3289.79 137.321   2
  -6   8   0 2948.66 138.188   1
  -8   6   0 3058.93 122.149   2
  -8   6   0 3137.32 123.009   2
   6  -8   0 3148.97 125.574   2
  -6   8   0 3125.42 127.502   2
  -6   8   0 2931.37 121.450   5
  -6  -8   0 3070.06 133.992   3
  -6   8   0 2925.12 126.032   2
   8  -6   0 3051.65 135.905   4
   8   6   0 3153.77 133.375   2
   6   8   0 3113.34 129.270   5
  -8  -6   0 3086.65 132.306   3
  -6  -8   0 3106.59 124.019   4
   6  -8   0 2989.27 132.269   4
  -8  -6   0 3269.57 135.874   2
   6   8   0 2985.35 134.696   2
   8   6   0 3139.03 123.351   5
   8  -8   0 1672.01 85.5277   4
  -8   8   0 1600.96 73.6214   2
  -8  -8   0 1641.93 86.8166   2
  -8   8   0 1587.16 88.1658   1
   8   8   0 1593.48 83.2826   2
  -8  -8   0 1631.54 83.0518   3
  -8   8   0 1717.54 68.5677   5
   8   8   0 1755.67 76.1813   5
  -1   9   0 5.91802 14.3022   1
  -9  -1   0 7.75300 10.6836   2
  -9  -1   0 -0.5637 9.83340   3
   9  -1   0 9.34502 7.79069   2
   1   9   0 19.6063 18.2926   1
  -9  -1   0 7.73347 12.8588   2
   9  -1   0 -3.8883 18.6495   4
   9   1   0 16.6949 9.90696   2
  -1  -9   0 72.5946 19.8097   3
   1   9   0 -8.6181 11.9804   5
   1  -9   0 -0.7665 13.4436   3
  -9   1   0 -0.8744 8.43245   2
   1  -9   0 9.30012 14.6391   2
  -1  -9   0 -3.9479 19.1222   2
   1  -9   0 5.69886 12.4699   4
  -9   1   0 8.61887 9.45348   2
  -1   9   0 21.8726 17.8164   2
  -9  -1   0 -8.2627 6.15970   5
   1   9   0 -16.621 14.5005   2
   9   1   0 -25.954 13.6702   4
  -9   1   0 0.48161 8.11869   3
  -1   9   0 14.5960 11.6846   5
  -9   3   0 0.73436 7.33230   3
   3   9   0 0.39735 18.4659   1
  -3   9   0 30.9851 16.6747   2
  -9   3   0 3.64144 10.6878   2
   3   9   0 6.28009 15.7820   5
  -3  -9   0 -7.2453 16.3194   2
  -9   3   0 -10.583 6.96250   2
   3  -9   0 -1.7091 14.0581   3
  -9  -3   0 -24.770 12.3041   3
  -3   9   0 -3.7144 18.3700   1
   9   3   0 -19.222 14.1097   2
  -3   9   0 2.13582 12.0326   5
  -9  -3   0 30.5988 15.2089   2
   3  -9   0 4.65644 14.1335   4
   3   9   0 -16.269 19.4293   2
  -3  -9   0 16.4729 19.5195   3
   9   3   0 14.3515 17.3312   4
   3  -9   0 7.19558 14.9810   2
   9  -3   0 -0.7320 19.6553   4
  -9   5   0 1.39190 12.0430   2
  -9  -5   0 2.95068 17.3179   2
   5  -9   0 8.43145 17.9988   4
   5   9   0 -32.120 14.3195   5
  -5  -9   0 15.7216 17.2288   2
  -5  -9   0 6.66307 19.9680   3
  -9   5   0 23.0991 16.6664   1
   5   9   0 26.3371 22.4568   2
   9   5   0 -8.1868 5.58938   5
  -5   9   0 13.4883 14.1371   2
  -5   9   0 -3.9624 10.2235   5
  -5   9   0 -8.3606 21.1715   1
   5  -9   0 -0.3899 12.0704   2
  -9   5   0 -5.8160 8.96236   2
  -9  -5   0 16.2748 16.2104   3
  -9   5   0 -7.2891 8.84864   3
   9  -5   0 23.0488 17.3366   4
   9   5   0 -9.5144 15.3072   2
  -7   9   0 16.5374 12.8341   2
   9  -7   0 -12.738 20.6334   4
  -9  -7   0 15.3334 19.8945   3
   9   7   0 20.3023 10.5869   5
  -7   9   0 -7.3052 19.0362   1
   7   9   0 5.25526 11.6751   5
  -7   9   0 2.86610 10.6511   5
  -7  -9   0 28.2425 22.5471   2
   9   7   0 0.11994 15.7151   2
  -9   7   0 -18.646 19.2436   1
   7   9   0 60.1306 20.0476   2
  -7  -9   0 36.4182 22.4467   3
  -9  -7   0 -4.1075 16.0270   2
  -9   7   0 32.5790 12.3717   2
   7  -9   0 -0.0454 19.3885   4
  -9   9   0 9.76389 10.2556   5
   9  -9   0 -13.258 20.7254   4
  -9  -9   0 -5.6780 16.2808   3
  -9  -9   0 56.2326 24.0403   2
  -9   9   0 7.40138 24.9816   1
   9   9   0 6.22037 12.0060   5
  -9   9   0 2.24922 14.1919   2
   9   9   0 10.9385 18.3140   2
 -10   0   0 1284.43 61.1856   2
   0  10   0 1301.43 66.7490   5
  10   0   0 1245.91 60.8781   2
 -10   0   0 1335.63 54.0945   5
   0 -10   0 1263.88 69.8071   2
   0 -10   0 1335.69 69.7139   3
   0 -10   0 1354.40 61.4184   4
   0  10   0 1269.61 69.8838   2
  10   0   0 1339.37 72.3278   4
 -10   0   0 1350.17 61.1021   2
 -10   0   0 1407.70 56.7321   5
   0  10   0 1336.31 70.0376   1
 -10   0   0 1371.78 60.6156   3
   2 -10   0 2526.62 110.612   4
  10   2   0 2613.71 116.690   4
   2 -10   0 2669.05 115.058   3
 -10  -2   0 2643.74 111.558   2
  -2  10   0 2740.68 117.583   2
  -2 -10   0 2537.51 117.079   3
   2  10   0 2647.14 117.657   1
  10  -2   0 2538.81 117.982   4
   2 -10   0 2597.91 116.165   2
   2  10   0 2473.16 119.515   2
 -10  -2   0 2636.67 110.412   3
 -10  -2   0 2745.06 106.486   5
 -10   2   0 2632.45 104.857   3
  10   2   0 2625.90 109.212   2
  -2  10   0 2530.23 111.853   5
 -10   2   0 2752.39 105.434   2
  -2 -10   0 2515.44 119.394   2
 -10   2   0 2671.30 107.027   2
   2  10   0 2470.01 113.761   5
  -2  10   0 2657.24 117.551   1
  -4 -10   0 1432.99 76.6344   3
  -4  10   0 1430.59 68.4202   5
   4  10   0 1312.74 76.2032   2
  10  -4   0 1396.23 76.6086   4
 -10  -4   0 1467.98 71.6947   3
  -4  10   0 1420.60 78.4074   1
  -4  10   0 1358.79 72.1970   2
   4 -10   0 1431.88 71.8250   4
   4  10   0 1496.18 74.0805   5
   4 -10   0 1499.25 71.6204   2
  -4 -10   0 1321.39 76.3373   2
 -10   4   0 1537.98 62.4540   2
 -10  -4   0 1446.34 72.9714   2
 -10   4   0 1386.05 76.2176   1
 -10   4   0 1553.41 61.7554   3
 -10   4   0 1529.67 62.9018   2
  10   4   0 1476.12 70.7823   2
   6 -10   0 1457.31 77.7309   4
  -6  10   0 1483.64 85.6050   1
  10   6   0 1511.94 75.9638   2
 -10   6   0 1612.65 65.3004   3
   6  10   0 1466.31 83.7862   2
  -6  10   0 1540.75 69.9499   5
  -6  10   0 1568.47 74.4731   2
 -10  -6   0 1549.36 80.1853   2
  -6 -10   0 1556.31 83.4635   3
 -10   6   0 1568.26 65.7518   2
   6  10   0 1452.61 74.0941   5
 -10   6   0 1605.94 82.4218   1
  10  -6   0 1554.86 83.1176   4
  -6 -10   0 1410.22 81.0503   2
 -10  -6   0 1647.34 79.0473   3
  10  -8   0 1166.08 69.1271   4
  -8 -10   0 1126.70 69.5310   2
   8  10   0 1269.17 62.0758   5
  10   8   0 1231.74 68.8698   2
  -8 -10   0 1125.05 70.3025   3
 -10  -8   0 1082.21 67.0310   2
  -8  10   0 1065.09 58.1931   2
   8 -10   0 1278.41 70.1834   4
  -8  10   0 1173.30 55.4129   5
  -8  10   0 1235.74 77.4949   1
   8  10   0 1032.90 70.3373   2
 -10   8   0 1210.37 74.0064   1
 -10   8   0 1154.08 55.0328   2
 -10   8   0 1184.21 49.4099   5
 -10  -8   0 1195.99 66.2650   3
  10  10   0 2330.90 111.746   2
  10 -10   0 2431.29 113.250   4
 -10  10   0 2222.01 93.6706   5
 -10 -10   0 2325.18 112.028   3
 -10 -10   0 2164.96 110.610   2
 -10  10   0 2235.73 97.3726   2
 -10  10   0 2127.44 114.101   1
  -1  11   0 -3.2566 19.6229   2
  -1 -11   0 16.2761 19.5880   3
  -1  11   0 14.9214 18.8828   1
  -1 -11   0 -7.1836 10.6231   4
   1 -11   0 -1.9181 18.7100   2
  -1 -11   0 9.61849 17.4758   2
 -11   1   0 6.28712 5.41520   5
 -11   1   0 -3.5719 8.43110   3
   1  11   0 31.4478 20.0047   1
   1  11   0 18.2585 21.5059   2
 -11  -1   0 16.2861 11.4474   3
   1 -11   0 -12.593 13.0134   4
  11   1   0 8.97367 20.3612   4
 -11   1   0 5.05651 4.69995   5
   1 -11   0 -7.8984 17.8413   3
   1  11   0 5.52820 14.7137   5
 -11  -1   0 -3.2202 12.0812   2
 -11   1   0 1.78825 10.4703   2
  -1  11   0 15.0913 16.1813   5
  11  -1   0 19.2127 17.8015   4
   3  11   0 6.89208 17.4367   1
  -3  11   0 10.6578 14.8975   5
 -11  -3   0 8.88418 13.9124   3
  11   3   0 -11.294 15.1643   4
  -3 -11   0 24.9289 18.9949   2
 -11  -3   0 -6.6816 14.5203   2
  -3 -11   0 9.32636 17.1903   3
 -11   3   0 -10.448 6.84926   3
  11   3   0 -15.784 12.5612   2
 -11   3   0 5.97087 13.1243   2
   3  11   0 16.6219 17.8068   5
   3 -11   0 22.2463 16.6397   4
  -3  11   0 -4.4206 17.4926   2
  -3  11   0 20.1119 20.8332   1
   3  11   0 37.0943 20.2039   2
   3 -11   0 -16.397 16.3564   2
  11  -3   0 -2.8055 17.0459   4
   3 -11   0 26.9322 17.7572   3
  -5  11   0 18.7193 16.0954   5
  11  -5   0 14.9332 24.0987   4
   5 -11   0 -2.4906 13.7177   2
 -11   5   0 11.2769 9.00958   2
 -11   5   0 9.75833 8.39478   3
   5  11   0 -5.4664 18.9326   2
 -11  -5   0 3.64681 13.8951   2
   5  11   0 -2.5369 17.5553   5
  -5 -11   0 -21.177 17.6822   3
  -5 -11   0 -6.0447 23.2965   2
 -11   5   0 9.37097 17.1090   1
  -5  11   0 12.1124 22.3926   1
  11   5   0 5.38596 15.0785   2
 -11  -5   0 6.81846 13.6020   3
   5 -11   0 -4.1835 13.3561   4
  -5  11   0 6.12663 16.8205   2
  -7  11   0 -11.214 14.7374   2
  -7 -11   0 18.3486 19.4338   3
  -7  11   0 4.97956 25.6019   1
   7 -11   0 -27.170 18.7576   4
 -11  -7   0 8.47930 19.2625   3
  -7  11   0 15.7821 14.9543   5
  11  -7   0 11.8753 20.8206   4
 -11   7   0 10.8919 10.5532   2
   7  11   0 20.2755 17.8300   5
  11   7   0 28.5227 19.5627   2
 -11   7   0 10.8196 18.6788   1
  -7 -11   0 7.71503 23.5864   2
 -11  -7   0 5.23160 20.2710   2
   7  11   0 24.4983 25.1170   2
  -9 -11   0 5.90743 20.5535   2
  -9  11   0 4.70697 16.3308   2
 -11   9   0 6.48875 8.79118   5
  -9  11   0 2.72249 29.1122   1
  -9  11   0 2.64252 12.4239   5
 -11  -9   0 18.0162 20.1923   2
   9 -11   0 5.75179 22.0811   4
 -11   9   0 37.5347 23.2047   1
 -11   9   0 2.56784 12.0959   2
   9  11   0 -8.9770 20.1151   2
  11  -9   0 -4.6677 20.2211   4
  11   9   0 29.7482 22.7784   2
  -9 -11   0 -9.5060 22.9971   3
 -11  -9   0 -1.2974 21.7000   3
  11  11   0 38.9227 24.9746   2
  11 -11   0 3.21069 20.6806   4
 -11  11   0 8.10127 13.5717   5
 -11 -11   0 -36.222 18.0005   2
 -11  11   0 -3.8414 13.4056   2
 -11  11   0 -57.206 25.9296   1
 -11 -11   0 33.1251 24.5343   3
  12   0   0 2431.49 113.672   4
   0 -12   0 2380.92 111.150   2
 -12   0   0 2483.10 100.411   3
   0 -12   0 2454.28 101.228   4
   0 -12   0 2262.18 109.465   3
   0  12   0 2449.64 111.011   1
   0  12   0 2432.64 112.474   2
 -12   0   0 2210.89 99.1250   5
 -12   0   0 2373.53 101.121   2
   0  12   0 2268.92 106.588   5
  -2  12   0 1727.93 88.9989   5
  -2  12   0 1962.99 95.5096   2
   2  12   0 1888.67 96.1578   2
   2 -12   0 1827.70 91.7258   2
  -2 -12   0 1916.13 95.7597   3
  -2 -12   0 2000.08 82.1256   4
 -12   2   0 1924.57 80.3515   3
 -12   2   0 1971.37 73.4927   5
 -12  -2   0 1876.93 88.0261   2
  12   2   0 1860.96 93.3447   4
  -2  12   0 1852.52 92.3890   1
   2 -12   0 1848.42 91.7966   3
  12  -2   0 1856.82 97.2133   4
  -2 -12   0 1870.67 97.2427   2
   2  12   0 1966.78 95.4087   1
   2  12   0 1922.51 92.6103   5
 -12  -2   0 2018.20 87.4378   3
   2 -12   0 1977.89 87.7931   4
 -12   2   0 2045.73 84.4646   2
  -4  12   0 986.187 54.7194   5
   4  12   0 921.470 62.4325   2
   4  12   0 1124.97 60.8830   5
   4 -12   0 983.878 56.9112   2
 -12  -4   0 993.383 55.7049   3
  -4  12   0 1007.55 59.5663   2
  -4 -12   0 959.989 65.5587   2
  -4  12   0 985.626 60.9140   1
  -4 -12   0 801.603 58.8251   3
 -12   4   0 1068.07 47.1958   2
 -12  -4   0 950.747 56.5319   2
  12  -4   0 949.182 61.9336   4
   4 -12   0 966.288 56.0727   4
 -12   4   0 976.309 63.0070   1
  -6  12   0 1278.50 67.6378   5
   6 -12   0 1415.36 74.9397   4
  12  -6   0 1441.18 80.2178   4
 -12   6   0 1453.91 83.0023   1
  -6 -12   0 1389.10 80.3932   2
 -12  -6   0 1373.64 75.7545   2
  -6  12   0 1437.74 82.3604   1
  -6 -12   0 1464.91 79.0801   3
   6  12   0 1447.42 73.1268   5
 -12  -6   0 1370.19 74.1862   3
 -12   6   0 1402.95 60.3237   2
  -6  12   0 1436.40 72.9983   2
   6  12   0 1447.19 80.9476   2
  -8  12   0 1260.63 65.7793   2
  -8 -12   0 1142.03 74.5868   2
 -12  -8   0 1149.45 71.1315   2
   8 -12   0 1297.53 71.7467   4
 -12   8   0 1324.24 78.0078   1
   8  12   0 1422.49 69.0942   5
  -8  12   0 1195.29 80.8598   1
  -8 -12   0 1336.17 77.5714   3
   8  12   0 1140.26 74.3014   2
 -12  -8   0 1246.11 71.3798   3
 -12   8   0 1213.04 52.4807   5
  12  -8   0 1262.52 78.4884   4
 -12   8   0 1323.89 57.1363   2
  -8  12   0 1340.58 63.6504   5
 -10  12   0 532.642 60.8213   1
 -12  10   0 617.166 36.2475   2
  12 -10   0 599.871 51.3433   4
  10 -12   0 581.313 51.8625   4
 -10  12   0 631.043 41.5010   2
 -12  10   0 554.331 33.6647   5
 -12  10   0 564.564 60.0542   1
 -12 -10   0 548.832 52.9466   2
 -10 -12   0 655.782 57.3515   2
 -10 -12   0 626.705 54.0962   3
  10  12   0 682.820 56.3175   2
 -12 -10   0 525.737 47.3475   3
 -10  12   0 546.748 37.3937   5
 -12  12   0 829.289 74.6708   1
 -12  12   0 863.413 47.8439   2
 -12  12   0 854.164 46.8453   5
 -12 -12   0 834.904 65.6582   2
  12 -12   0 919.091 66.5353   4
 -12 -12   0 865.305 63.9224   3
  -1  13   0 16.5907 18.6588   5
 -13  -1   0 6.47157 14.5180   2
   1 -13   0 50.5219 22.6433   2
   1 -13   0 15.7427 14.2960   4
 -13   1   0 3.05134 13.5379   2
   1  13   0 15.4725 21.8382   1
 -13  -1   0 25.7099 14.2563   3
  13   1   0 4.41642 18.2083   4
  -1  13   0 4.82352 22.0434   2
  -1 -13   0 23.1905 13.6282   4
   1  13   0 22.7232 19.8684   2
 -13   1   0 27.1409 11.4811   3
   1  13   0 7.08741 19.7259   5
  -1 -13   0 -3.2875 16.8191   3
 -13   1   0 -1.3277 10.5687   5
   1 -13   0 38.3286 21.3130   3
  13  -1   0 -1.4568 24.0984   4
  -1 -13   0 4.09658 18.2693   2
  -1  13   0 10.6652 20.2870   1
 -13  -3   0 33.1622 18.8892   2
   3  13   0 9.62544 24.0263   1
   3  13   0 40.3361 22.1908   5
   3 -13   0 33.9935 19.3989   2
 -13   3   0 -12.590 14.2387   2
   3 -13   0 -18.639 16.8422   4
  -3  13   0 -1.2912 16.6555   2
  -3  13   0 33.4704 21.9870   1
  -3 -13   0 78.6728 26.8077   2
 -13  -3   0 20.8957 14.8502   3
  13  -3   0 53.0595 26.3662   4
  -3  13   0 0.90344 16.9794   5
  -3 -13   0 40.6961 21.3964   3
   3  13   0 13.0268 22.3511   2
 -13   5   0 8.27503 9.71657   2
   5  13   0 -20.085 19.8454   2
  -5  13   0 12.9777 24.2809   1
  -5  13   0 -13.847 15.0980   5
  -5  13   0 17.3797 19.4661   2
 -13  -5   0 1.27393 18.3879   2
   5 -13   0 -7.3754 17.4028   4
  -5 -13   0 -0.6714 19.3842   3
  13  -5   0 -17.616 17.9095   4
  -5 -13   0 70.9173 27.4140   2
 -13  -5   0 -6.3200 16.7009   3
 -13   5   0 44.9567 26.3040   1
   5  13   0 0.30713 16.3427   5
 -13  -7   0 -2.3602 19.7435   2
   7 -13   0 1.05167 19.5975   4
   7  13   0 -6.8990 18.8991   5
  -7  13   0 -2.6644 16.5082   2
  13  -7   0 2.61143 20.9167   4
  -7 -13   0 -4.9440 21.7036   2
  -7  13   0 45.1656 27.2892   1
 -13  -7   0 31.0187 20.6381   3
   7  13   0 -5.1885 22.0666   2
 -13   7   0 52.7309 27.0823   1
  -7 -13   0 -7.4121 20.1442   3
  -7  13   0 11.1500 15.4299   5
 -13   7   0 -5.4557 9.06729   2
 -13   9   0 -8.5162 9.89889   2
  -9 -13   0 11.2439 25.8126   3
  -9 -13   0 41.4113 29.1672   2
   9  13   0 -1.4520 20.8402   2
  -9  13   0 25.0206 16.3453   2
  -9  13   0 17.5629 17.3301   5
 -13   9   0 0.47987 11.7085   5
  13  -9   0 44.8689 24.4700   4
 -13  -9   0 30.3167 19.5004   2
 -13   9   0 -10.151 26.9515   1
   9 -13   0 17.8183 22.7350   4
  -9  13   0 63.0060 30.9131   1
 -13  -9   0 27.0343 24.1719   3
 -13 -11   0 -9.9108 22.2766   3
  11  13   0 37.7029 22.7771   2
 -11 -13   0 -15.852 20.3440   2
  11 -13   0 61.3990 27.7912   4
 -13  11   0 -4.7120 12.6486   5
  13 -11   0 26.9015 22.0647   4
 -11  13   0 12.8100 13.7108   5
 -11  13   0 -1.3284 31.4664   1
 -13  11   0 27.7290 31.8310   1
 -11 -13   0 10.6203 26.3974   3
 -13  11   0 3.96478 15.4650   2
 -13 -11   0 27.2681 26.0844   2
 -11  13   0 7.09737 15.8846   2
   0  14   0 1518.72 81.7373   5
  14   0   0 1425.40 85.5795   4
   0  14   0 1594.43 84.5939   1
   0  14   0 1694.09 86.7237   2
 -14   0   0 1532.34 73.7275   2
   0 -14   0 1761.83 88.7475   2
   0 -14   0 1564.87 82.8153   3
   2  14   0 954.555 58.8391   5
   2 -14   0 1017.62 53.4844   4
  14  -2   0 922.286 66.0709   4
  -2 -14   0 1030.40 67.3356   2
  14   2   0 1018.56 64.6298   4
 -14  -2   0 956.841 53.6563   3
  -2  14   0 960.210 62.6050   1
 -14  -2   0 935.105 53.7272   2
  -2  14   0 920.333 60.5706   2
   2 -14   0 1043.85 62.6689   2
   2  14   0 960.806 63.8217   1
 -14   2   0 991.851 44.3768   5
  -2 -14   0 931.166 63.9431   3
  -2  14   0 922.556 58.4102   5
 -14   2   0 958.096 51.6833   2
   2 -14   0 913.980 58.6029   3
   2  14   0 944.447 63.7878   2
   4 -14   0 1765.00 86.6033   4
 -14   4   0 1979.37 102.220   1
  14  -4   0 1834.49 96.3693   4
 -14  -4   0 1924.29 89.3038   2
   4  14   0 1803.14 90.5080   5
  -4  14   0 1731.27 93.0164   1
 -14   4   0 1808.77 76.8689   2
  -4 -14   0 1676.87 93.3562   3
  -4 -14   0 1917.60 97.8468   2
 -14  -4   0 1914.50 88.8626   3
  -4  14   0 1870.18 89.0428   5
   4  14   0 1609.49 94.9413   2
  -4  14   0 1792.56 91.3121   2
  14  -6   0 590.125 53.2573   4
  -6  14   0 636.920 49.0028   2
   6  14   0 622.194 49.5508   5
  -6  14   0 763.860 58.2865   1
  -6  14   0 633.063 45.4516   5
 -14   6   0 623.753 54.6955   1
   6  14   0 699.956 56.7686   2
 -14  -6   0 727.451 49.3693   3
   6 -14   0 710.808 49.4816   4
  -6 -14   0 760.657 55.0777   3
 -14  -6   0 590.970 46.4098   2
  -6 -14   0 692.154 55.9563   2
  -8  14   0 604.965 44.6512   2
  -8  14   0 524.650 55.4789   1
   8 -14   0 617.699 49.4860   4
 -14  -8   0 491.439 48.6130   2
  -8  14   0 510.544 40.6163   5
  -8 -14   0 523.624 55.0481   2
 -14   8   0 646.945 59.5520   1
  14  -8   0 616.159 56.2449   4
 -14  -8   0 593.922 45.5367   3
  -8 -14   0 575.555 54.1461   3
   8  14   0 564.096 57.1026   2
 -14 -10   0 512.743 49.4203   3
  14 -10   0 431.642 47.0316   4
 -14  10   0 491.855 54.1707   1
 -10  14   0 486.441 40.5485   2
 -10  14   0 414.944 38.0804   5
 -10 -14   0 478.790 47.9653   3
  10 -14   0 564.013 49.6036   4
 -14 -10   0 552.184 47.2903   2
 -10 -14   0 450.450 53.5443   2
  10  14   0 418.500 50.0599   2
 -10  14   0 491.713 57.8765   1
   1 -15   0 6.16640 17.3548   2
  -1  15   0 43.1927 23.5034   5
   1  15   0 11.7348 24.2507   1
  -1  15   0 26.6971 20.9039   2
  -1 -15   0 51.7579 27.9844   2
   1  15   0 28.6381 19.0406   5
  15   1   0 70.2897 26.9467   4
   1 -15   0 6.31182 21.8174   3
   1  15   0 -4.9542 19.5854   2
 -15  -1   0 6.67378 15.0970   2
  -1 -15   0 47.9184 23.2025   3
  15  -1   0 23.9277 21.6679   4
 -15   1   0 8.72199 15.4868   2
  -1  15   0 43.9369 20.2125   1
 -15  -3   0 29.5816 18.9156   3
   3  15   0 -4.8444 21.6706   2
  15  -3   0 35.1577 27.3382   4
  -3 -15   0 33.1639 24.9261   3
 -15   3   0 18.6632 11.2296   5
  -3  15   0 -29.759 16.6547   2
 -15   3   0 -12.366 12.8063   2
   3  15   0 10.9181 21.8561   5
  -3 -15   0 47.4804 28.0210   2
  -3  15   0 14.5817 17.1964   5
  -3  15   0 2.49117 22.0041   1
 -15  -3   0 13.7340 16.9879   2
  15  -5   0 -16.590 20.6801   4
   5  15   0 2.57722 22.5369   2
  -5  15   0 38.1035 20.8594   5
  -5  15   0 48.0890 23.1695   2
   5  15   0 12.5515 22.4004   5
  -5  15   0 54.3084 26.0910   1
  -5 -15   0 42.9446 22.6077   3
 -15  -5   0 13.7184 18.2238   2
   5 -15   0 -24.851 16.1917   4
  -5 -15   0 14.1301 22.0570   2
 -15   5   0 -28.450 18.8536   1
 -15  -5   0 9.90538 16.9458   3
 -15  -7   0 16.0019 21.6968   2
   7  15   0 33.6789 20.7226   5
  -7 -15   0 10.6303 22.3785   3
   7 -15   0 31.8230 21.5043   4
  -7  15   0 7.08244 25.8740   1
  -7 -15   0 37.6750 24.3901   2
  -7  15   0 12.9442 20.1605   2
  15  -7   0 -19.039 21.0600   4
 -15   7   0 -18.063 23.3921   1
   7  15   0 -19.811 23.4454   2
  -7  15   0 8.42582 18.5467   5
 -15  -7   0 30.2995 20.8038   3
   9 -15   0 17.9825 23.2242   4
  -9  15   0 13.9746 18.4677   5
  15  -9   0 2.98771 22.0594   4
 -15  -9   0 -8.7448 17.4138   2
  -9 -15   0 21.6271 25.9172   3
  -9 -15   0 21.1489 22.5052   2
  -9  15   0 29.6252 22.4850   2
 -15  -9   0 9.11589 21.0219   3
   9  15   0 54.9863 31.3828   2
 -15   9   0 15.6759 32.0980   1
   0  16   0 961.469 64.4035   1
   0 -16   0 900.312 68.6037   2
   0  16   0 1025.76 65.8774   2
 -16   0   0 1018.69 53.9373   2
   0  16   0 968.075 63.7897   5
  16   0   0 1043.90 69.6585   4
   0 -16   0 963.547 65.2876   3
  16  -2   0 718.082 55.0710   4
   2  16   0 725.766 57.0318   1
  -2 -16   0 698.407 53.1121   3
 -16   2   0 584.175 42.1296   2
  -2  16   0 713.759 53.4079   2
  -2  16   0 685.766 54.1202   1
  -2 -16   0 677.289 58.9468   2
   2  16   0 663.943 53.5915   5
   2  16   0 773.065 57.8127   2
 -16  -2   0 689.712 44.1470   2
  -2  16   0 708.966 52.1135   5
 -16   2   0 669.759 41.4480   5
  16  -4   0 442.028 47.3945   4
  -4  16   0 413.849 45.8825   1
  -4  16   0 451.088 46.2937   2
  -4 -16   0 389.197 44.0882   3
   4  16   0 539.519 47.5608   5
  -4  16   0 466.265 42.5198   5
  -4 -16   0 465.021 53.3540   2
 -16   4   0 414.345 49.2733   1
   4  16   0 500.408 50.3732   2
 -16  -4   0 469.346 40.3107   2
 -16  -6   0 748.812 56.6869   2
  16  -6   0 767.060 64.7671   4
  -6 -16   0 805.400 61.1769   3
 -16  -6   0 828.852 53.3874   3
  -6  16   0 706.421 52.2905   5
  -6 -16   0 770.998 66.0005   2
   6  16   0 747.044 53.1664   5
  -6  16   0 824.831 57.3408   2
 -16   6   0 783.005 67.3734   1
   6  16   0 821.985 63.7365   2
  -1  17   0 65.4511 25.3881   5
 -17  -1   0 10.2546 15.1379   2
 -17   1   0 64.4340 18.0511   2
  -1 -17   0 28.5980 26.2407   3
   1  17   0 18.7590 24.2299   1
  -1  17   0 -6.1568 22.0763   1
   1  17   0 25.4346 24.9307   2
  -1  17   0 71.4762 29.1252   2
  17  -1   0 -57.972 23.3171   4
   1  17   0 59.7735 26.2699   5
  -3  17   0 46.5790 23.9917   5
  -3  17   0 -25.299 17.7538   2
   3  17   0 118.084 29.5955   5
  -3 -17   0 39.0223 28.2766   2
 -17   3   0 14.5546 30.0317   1
  -3 -17   0 3.40411 25.3094   3
 -17  -3   0 -6.1971 15.0797   2
  17  -3   0 26.0748 24.0575   4
   3  17   0 -6.0710 29.2124   2
 -17   5   0 16.0559 24.9449   1
  -5 -17   0 58.8192 28.8056   3
  -5  17   0 8.80870 17.3492   5
   5  17   0 1.42679 24.5489   2
  -5 -17   0 115.673 34.2887   2
  17  -5   0 -17.069 28.5251   4
 -17  -5   0 29.5550 19.6880   2
   5  17   0 102.716 27.8729   5
  -5  17   0 17.3770 22.1879   2
   0   1   1 -2.1419 1.28232   1
   0   1   1 3.44652 2.59396   2
   0   1  -1 -3.1200 2.06667   2
   0  -1   1 0.15035 2.73083   1
   1   0   1 0.30593 1.97754   4
  -1   0  -1 1.04562 1.46136   2
  -1   0   1 -0.9573 1.56267   3
   0   1  -1 2.16738 2.40622   1
   0  -1  -1 1.00323 2.12410   3
   0  -1   1 -0.0044 1.82221   5
  -1   0  -1 -0.2714 0.99482   3
   0  -1   1 -1.1859 2.21621   3
   0  -1   1 0.92081 2.13874   2
   1   0  -1 1.46914 2.60447   4
   0  -1  -1 -0.4990 2.14182   2
   1   0   1 1.86131 2.64956   2
   2   1   1 69.4977 8.83400   4
   2  -1  -1 59.1223 9.43885   4
  -1   2   1 78.6405 9.97900   2
   1   2  -1 87.1350 11.2276   2
  -2   1  -1 88.0256 9.96731   2
  -1  -2  -1 76.6422 10.9655   2
   2   1   1 81.7713 10.4067   2
   1   2  -1 66.6829 10.2816   1
  -2  -1   1 100.940 10.4270   2
  -2  -1   1 75.9014 9.06693   3
  -1   2   1 76.8938 9.90613   1
  -1  -2  -1 74.5505 11.1580   3
   1  -2   1 73.8456 9.67508   4
   1  -2   1 79.0871 8.21698   3
   1  -2   1 78.7534 9.26466   2
  -1   2  -1 77.2308 11.4309   1
   1  -2  -1 79.6693 8.88169   2
   1   2   1 62.5164 10.3806   2
   2  -1   1 76.6560 10.2851   4
   1  -2  -1 74.6555 8.63720   4
  -1  -2   1 56.9010 9.17407   3
  -1  -2   1 77.3851 10.6313   2
   2   1  -1 80.7764 9.74192   2
  -2  -1  -1 80.5003 9.27813   3
   1   2   1 94.3196 11.6376   1
  -2  -1  -1 53.8764 6.65143   5
  -1   2  -1 85.7466 9.56774   2
  -2  -1  -1 73.3982 10.2511   2
  -1  -2   1 86.5907 9.40484   5
   3   0  -1 -4.6005 6.40947   2
   0   3  -1 -6.1730 8.01301   3
   0   3  -1 9.51309 12.4457   1
   3   0   1 -5.8795 8.95427   4
   3   0   1 6.48267 5.85105   2
   0  -3   1 -5.8892 8.60363   3
  -3   0  -1 -8.8920 6.08379   2
  -3   0  -1 -4.6722 5.16654   3
   3   0  -1 33.4920 12.2990   4
   3   0  -1 -7.6030 8.43046   3
   0   3  -1 -15.374 9.60101   2
  -3   0   1 7.14220 6.11351   2
   0  -3  -1 -0.0904 11.3377   3
   0   3   1 17.0893 11.2562   2
   0   3  -1 0.72824 8.91997   2
   0   3  -1 -6.5459 8.32246   5
   0  -3  -1 11.6733 12.7012   2
  -3   0   1 1.56073 8.73510   4
   3   0  -1 -0.3239 1.82192   2
  -3   0  -1 -1.8277 8.38412   4
   0   3   1 11.0046 10.4330   1
   0  -3   1 -10.921 9.40807   2
  -3   0  -1 -3.0562 7.74472   2
   0   3   1 12.8586 11.1620   3
   0  -3   1 2.59395 6.64411   5
   0   3   1 -15.133 9.43643   2
   3   0   1 -10.745 7.02829   3
  -3   0   1 -15.188 6.21914   3
  -3   0   1 0.21338 5.58625   2
  -2   3   1 90.7434 11.3494   2
  -2   3   1 74.6869 10.7359   2
   3   2   1 88.9734 10.7277   5
  -3   2  -1 67.6397 9.33498   2
  -3  -2   1 68.6659 12.7135   3
   2   3  -1 69.2340 11.4502   5
   2   3  -1 70.8983 14.9445   2
   3  -2  -1 69.6836 8.26279   2
  -3   2  -1 62.9432 15.4992   1
   2  -3   1 58.3300 10.9834   2
   3   2   1 75.5272 11.8227   4
   2  -3   1 85.2584 11.4789   3
   2  -3   1 83.2155 12.8597   4
  -3  -2   1 83.7928 12.8111   4
  -3  -2   1 98.2106 15.4867   2
  -3   2  -1 79.7218 13.0313   4
  -2   3   1 95.6644 13.5303   1
  -2   3   1 72.1119 11.3193   3
   3   2   1 78.6891 15.0275   3
  -3  -2   1 84.2304 14.9961   2
  -2  -3  -1 48.5979 13.0547   3
  -3  -2   1 89.3045 11.3008   5
  -3   2  -1 82.9154 10.8948   2
  -2  -3  -1 87.9241 15.7408   2
   3   2   1 89.7544 15.3781   2
   2   3  -1 70.5523 15.2796   1
   3  -2  -1 103.901 9.93505   2
   3  -2  -1 82.5077 14.1431   4
  -2   3   1 62.6543 12.0488   4
  -2  -3   1 69.9356 17.3117   2
  -3  -2  -1 74.1377 11.0431   4
  -2   3  -1 97.1739 12.5180   2
  -3  -2  -1 87.3918 12.9411   3
   2  -3  -1 75.4557 12.2267   4
   3  -2   1 86.6555 16.8634   4
  -3  -2  -1 74.6481 12.9573   2
   2   3   1 79.4834 14.7842   2
  -2   3  -1 80.1399 14.5465   4
   2   3   1 79.6069 11.9864   5
  -3   2   1 68.5610 9.00150   2
   3   2  -1 99.6236 13.4577   2
  -2   3  -1 75.7216 11.9893   2
  -3  -2  -1 82.1251 11.4103   5
   3   2  -1 76.8802 10.4016   5
  -3   2   1 78.5934 8.13963   2
  -2   3  -1 97.8771 17.8372   1
  -2   3  -1 92.2334 10.4556   3
  -2  -3   1 72.3625 13.7199   3
  -2  -3   1 62.2548 11.3104   5
  -3   2   1 71.9020 13.5205   4
  -3  -2  -1 66.5828 15.0935   2
   2  -3  -1 86.7519 10.7816   2
  -4  -1   1 7.49748 9.34853   2
  -4  -1   1 -0.8542 5.18311   5
  -4   1  -1 12.2610 6.60304   3
   1  -4   1 -4.6401 10.7366   4
   4   1   1 5.31829 12.6363   4
   1  -4   1 -12.763 12.7627   2
  -1   4   1 -27.309 12.6774   1
   1   4  -1 -22.296 11.7026   5
  -1   4   1 -0.9136 12.1639   2
  -4   1  -1 0.33531 10.7216   4
   1  -4   1 -4.9756 11.9473   3
  -4   1  -1 -3.8132 8.41451   2
   1   4  -1 -8.9580 15.7886   2
  -1  -4  -1 -9.7730 12.4746   3
   4   1   1 -25.490 9.80758   3
  -4   1  -1 7.78480 9.38533   2
  -4  -1   1 11.4902 9.15629   3
  -4  -1   1 -6.9576 9.49172   2
  -4  -1   1 8.22239 10.9045   4
  -1  -4  -1 -8.6186 13.1484   2
  -1   4   1 0.35460 13.0673   2
   4  -1  -1 -4.5023 4.55093   2
   1   4  -1 -14.986 15.1438   1
   4   1   1 7.52526 10.6857   2
   4  -1  -1 19.4569 12.8516   4
   4  -1   1 -2.7125 11.6771   4
  -1  -4   1 -5.4200 11.5716   3
  -4  -1  -1 5.90372 6.49925   5
   1  -4  -1 5.28294 9.80530   4
  -4  -1  -1 -2.5385 10.5048   2
  -4  -1  -1 7.71399 12.4191   4
  -1  -4   1 -5.3259 12.8965   2
  -4   1   1 6.57509 6.14960   2
  -4  -1  -1 20.7310 10.4239   3
   1   4   1 7.95073 13.7457   2
  -1   4  -1 7.49486 9.74163   5
   1  -4  -1 -6.9428 12.1616   3
   4   1  -1 -6.2476 11.3431   3
  -1   4  -1 12.9504 14.2741   2
  -4   1   1 3.11477 6.04113   2
   4  -1   1 -4.2030 5.86805   2
  -4   1   1 -5.8784 12.8750   4
   1  -4  -1 -5.3607 12.8391   2
   4   1  -1 -0.0537 9.25634   2
   1   4   1 24.5370 14.3389   1
   1   4   1 2.08549 9.78648   5
  -1   4  -1 -7.4490 12.9939   2
   4   1  -1 24.3836 11.2843   4
  -1   4  -1 17.5927 13.6933   1
  -4   1   1 8.34673 7.69722   3
  -4  -1  -1 -10.271 10.0006   2
  -3  -4  -1 16.0574 13.5537   3
  -4  -3   1 3.30587 10.2159   4
  -3  -4  -1 30.8484 18.0225   2
  -3   4   1 -2.9401 13.8611   1
   3  -4   1 -11.480 8.97509   2
  -4   3  -1 -4.3680 10.2117   4
  -3   4   1 17.7383 9.75420   2
  -4   3  -1 9.94941 8.87800   2
  -3   4   1 -11.619 9.28144   3
   4   3   1 17.9557 9.40096   5
  -4  -3   1 37.5917 16.0994   2
  -4   3  -1 -25.086 11.2987   1
  -3   4   1 23.7228 10.7959   2
   3   4  -1 9.47479 10.1119   5
   3  -4   1 5.18430 14.7299   4
  -4  -3   1 -3.5944 7.88305   5
   4  -3  -1 41.3595 16.5499   4
  -4  -3   1 -11.139 10.7404   3
   4   3   1 -8.6292 15.3522   2
   4  -3  -1 -1.1133 6.58844   2
  -4   3  -1 -4.1323 8.38982   2
   3   4  -1 32.3269 17.2413   2
  -3   4   1 -18.233 13.3495   4
   3   4   1 -4.3926 13.4139   2
   3   4   1 16.4415 10.8674   5
   3  -4  -1 -5.7544 13.6379   4
  -4  -3  -1 -10.913 12.1189   2
  -3  -4   1 19.7826 17.3371   2
  -3   4  -1 4.50762 10.2650   2
   4   3  -1 -10.607 8.32027   5
  -3   4  -1 -4.5359 13.2547   4
   4   3  -1 -7.4065 14.8156   2
  -4   3   1 -0.9851 13.8829   4
  -4  -3  -1 0.72303 11.2166   3
   4  -3   1 -4.0775 4.72134   2
  -3  -4   1 4.52799 12.5355   3
   3  -4  -1 -1.5446 9.06169   2
  -3   4  -1 -4.1992 16.1315   1
   4  -3   1 -14.774 12.2644   4
  -3   4  -1 0.37415 9.36373   3
  -3   4  -1 -1.3814 10.1812   2
  -4   3   1 -15.220 12.9034   1
  -4   3   1 7.10351 7.70289   2
  -4  -3  -1 -7.5810 9.21255   4
  -4   3   1 -2.1710 7.53916   2
   0   5  -1 -11.584 12.3899   1
   0  -5  -1 -25.671 14.4660   3
   0   5   1 -14.601 11.2340   5
   5   0   1 2.01250 9.78903   3
   0   5   1 -6.7252 15.4792   2
  -5   0  -1 -9.8559 8.22438   2
  -5   0  -1 0.37040 12.2123   4
   0   5   1 -8.2518 11.0513   1
  -5   0   1 16.9608 8.97484   2
   5   0   1 -12.852 11.7213   4
   0   5  -1 -10.745 12.9163   2
   5   0  -1 4.93949 9.86591   3
   5   0  -1 2.31393 15.3857   4
   5   0   1 -1.1690 6.53982   2
  -5   0  -1 0.55097 8.32454   3
  -5   0   1 1.11733 8.54073   2
   0  -5   1 -0.1425 15.7181   2
  -5   0   1 -16.413 11.8933   4
  -5   0   1 -7.0711 8.06753   3
   5   0  -1 0.03547 3.94239   2
  -5   0  -1 0.71143 10.1854   2
   0  -5  -1 4.73954 13.6712   2
   0   5  -1 -3.3740 12.4057   5
   0  -5   1 -13.581 14.1751   3
   0  -5  -1 6.81179 9.30403   4
  -5  -2   1 -13.419 12.0336   2
   2  -5   1 30.5033 11.1255   2
  -5  -2   1 -0.2225 13.0152   3
   5  -2  -1 -0.5014 15.9329   4
  -5   2  -1 -1.3962 10.7360   2
   2   5  -1 0.83300 13.7794   1
  -2  -5  -1 -10.201 14.4373   2
  -5  -2   1 13.6510 12.3941   2
  -5  -2   1 5.12592 8.51420   5
  -5   2  -1 6.01198 6.67668   3
   2  -5   1 -6.8960 11.0972   3
  -2   5   1 -1.9378 12.6295   2
   2  -5   1 -2.5188 12.8534   4
   2   5  -1 0.57041 13.9899   5
  -2   5   1 9.50894 12.4797   4
   5   2   1 -6.2726 12.4545   2
   5   2   1 6.93778 4.12717   5
  -5  -2   1 -3.6552 12.5431   4
  -2   5   1 -2.4237 12.2623   2
  -2   5   1 -7.3691 15.2182   1
  -2  -5  -1 -4.2679 15.7193   3
  -5   2  -1 -1.5109 12.4793   2
   5   2   1 9.19907 13.4554   4
   2   5  -1 12.2352 18.3738   2
  -2   5  -1 -17.763 14.8654   1
   2   5   1 -12.347 14.0205   2
   2  -5  -1 1.11341 12.5582   3
  -5   2   1 -1.6945 9.23170   2
   2   5   1 -12.455 10.3251   5
   5   2  -1 -0.8152 13.9669   4
  -5   2   1 12.5999 8.85284   2
   5   2  -1 -11.773 11.6017   2
  -5  -2  -1 6.41438 12.3087   3
   5  -2   1 0.04630 6.57713   2
   2  -5  -1 7.54959 12.0039   4
  -2  -5   1 -9.6204 14.1698   2
  -5  -2  -1 -6.7894 12.5759   4
  -2   5  -1 9.82519 10.7912   5
   2  -5  -1 14.0645 10.8970   2
   2   5   1 -3.3150 15.2810   1
  -5  -2  -1 -6.3067 10.4685   2
  -5  -2  -1 7.30762 9.32126   5
  -2  -5   1 26.5838 17.0847   3
  -2   5  -1 20.9853 13.7756   2
   5  -2   1 9.13130 17.0161   4
  -5  -2  -1 14.5546 15.2224   2
  -5   4  -1 29.1182 15.4579   1
  -5  -4   1 54.5805 17.3128   3
   5   4   1 25.2320 17.4494   2
   4   5  -1 33.0520 13.4453   5
  -4  -5  -1 32.4897 15.0020   3
   5  -4  -1 34.2820 7.74200   2
   5   4   1 42.7478 11.6504   5
   4  -5   1 26.0784 11.5334   2
  -4   5   1 29.9947 12.4188   2
  -5  -4   1 21.0682 14.6553   2
  -5   4  -1 44.1427 8.42830   3
  -4   5   1 12.4202 10.0843   2
  -4  -5  -1 27.7152 10.2962   4
  -5   4  -1 26.8151 10.5714   2
  -4  -5  -1 46.3526 16.5036   2
   4   5  -1 41.2051 16.2346   2
  -4   5   1 67.6526 15.6195   1
   5  -4  -1 17.3698 14.8676   4
  -5   4  -1 38.4808 10.6334   2
  -5  -4   1 52.5143 13.1407   4
   4  -5   1 17.6101 14.4020   4
   4   5   1 29.7340 16.2422   2
  -4  -5   1 31.6590 19.7468   2
   4   5   1 36.4303 14.4184   5
  -4   5  -1 32.8482 11.7650   2
   5   4  -1 11.0475 17.1993   2
  -5   4   1 43.4629 9.28335   2
  -5   4   1 41.8446 9.41913   2
   4  -5  -1 8.76829 15.5256   4
  -5  -4  -1 20.0483 13.6385   3
   5  -4   1 31.2899 15.3269   4
  -5  -4  -1 23.2337 14.4578   2
   5  -4   1 8.08500 7.02121   2
  -5   4   1 24.0755 15.9328   1
  -5  -4  -1 40.4989 12.8453   4
   5   4  -1 41.7224 10.8852   5
  -4   5  -1 65.1796 19.5382   1
  -4   5  -1 38.9196 13.5347   2
   4  -5  -1 24.9149 8.72441   2
  -4  -5   1 18.6916 17.4853   3
  -6   1  -1 1.85947 6.95348   3
  -1   6   1 -22.525 14.6789   1
  -1   6   1 -16.290 15.0405   2
  -6  -1   1 -13.819 8.99447   2
  -6   1  -1 -7.5013 8.38421   2
   1   6  -1 11.8729 13.9608   1
   6  -1  -1 0.43104 6.50019   2
  -1  -6  -1 0.53578 16.6790   3
   1   6  -1 -24.256 12.9812   5
  -6  -1   1 -4.3488 11.2933   2
   6   1   1 15.1566 12.0242   2
  -6  -1   1 -1.7035 4.56259   5
   6   1   1 17.3350 15.7326   4
   1  -6   1 3.32982 13.0852   2
  -6   1  -1 -7.6165 8.62335   2
  -1   6   1 5.94852 11.2568   5
  -1  -6  -1 -8.2477 17.8909   2
   1   6  -1 -0.9655 17.7697   2
  -6  -1   1 -3.1169 10.3525   3
   1  -6   1 4.49495 11.2537   4
   1  -6   1 19.0436 14.3555   3
   6  -1  -1 -2.9861 16.2403   4
   1   6   1 10.2399 15.7006   1
  -1   6  -1 -10.302 16.4789   1
  -6  -1  -1 4.97849 10.5709   2
   6  -1   1 9.00324 17.0268   4
  -1  -6   1 -9.5257 13.0777   3
   1  -6  -1 2.02779 11.9738   3
  -6   1   1 -3.9653 7.60682   2
   6   1  -1 -5.1071 12.5049   4
  -6  -1  -1 -9.2520 9.06756   3
  -1   6  -1 3.97441 15.9183   2
  -1   6  -1 -18.545 11.4740   5
   1   6   1 0.41838 13.8398   5
  -1  -6   1 -1.2020 18.3322   2
  -6   1   1 3.94754 7.50466   2
   1  -6  -1 12.4219 13.0265   2
  -6   1   1 4.87308 8.22466   3
   1   6   1 14.7794 15.2501   2
  -6  -1  -1 0.39998 5.74894   5
  -6  -1  -1 -12.159 10.5364   2
   6  -1   1 -9.7500 9.20779   2
   1  -6  -1 7.29256 11.9108   4
   6   1  -1 16.4063 9.49529   2
  -3  -6  -1 49.9335 18.0270   2
   3   6  -1 47.1334 17.6251   1
  -6  -3   1 78.4776 12.6955   5
   6   3   1 86.5435 16.9078   4
   3  -6   1 73.0190 15.3462   2
  -6  -3   1 43.5058 16.2035   3
  -6   3  -1 88.6428 12.6540   2
   6   3   1 73.4463 17.8377   2
  -3   6   1 75.1050 15.9996   2
  -3   6   1 51.1627 19.1433   1
  -6   3  -1 42.8097 15.6270   1
   6  -3  -1 54.0832 20.6624   4
   3   6  -1 65.9261 17.2122   5
   3  -6   1 63.9533 14.2729   3
   3  -6   1 85.7174 17.5646   4
  -6  -3   1 66.3408 17.1961   2
  -3  -6  -1 69.9715 17.8876   3
   3   6  -1 63.1440 18.2079   2
  -3   6   1 80.5572 18.6011   2
  -6   3  -1 73.3172 13.9369   2
  -3  -6   1 69.9584 18.9268   2
  -3   6  -1 78.4642 12.1710   5
  -6  -3  -1 92.7302 17.5560   3
  -6   3   1 83.8295 9.99627   2
   6   3  -1 52.1449 6.62251   5
  -3  -6   1 49.1696 15.8038   3
   6   3  -1 80.3338 14.7237   2
  -6  -3  -1 74.9658 16.0732   4
   6  -3   1 87.9827 18.6776   4
  -3   6  -1 74.4303 21.7564   1
   3   6   1 90.4955 16.2366   5
   3  -6  -1 89.3180 15.6286   2
  -6  -3  -1 61.7949 15.3424   2
  -6   3   1 63.4734 11.0279   2
   3  -6  -1 65.1349 16.4729   4
  -3   6  -1 56.6394 15.3584   2
   3   6   1 58.4683 18.0828   2
  -5   6   1 -17.241 16.1463   1
   5   6  -1 9.17338 12.5061   5
   6   5   1 -15.242 9.09443   5
  -6   5  -1 -3.2341 16.1855   1
   6  -5  -1 4.44054 6.81617   2
  -5  -6  -1 -1.0227 9.61985   4
  -5   6   1 24.1524 12.3219   2
  -6   5  -1 6.69227 9.91152   2
   5  -6   1 6.88134 16.4276   4
  -6   5  -1 25.2831 10.5679   2
  -5   6   1 0.94364 11.1685   2
  -6   5  -1 8.79418 8.22599   3
  -5  -6  -1 16.5538 15.7688   2
  -6  -5   1 -15.311 15.8207   2
   5  -6   1 -8.4284 9.11106   2
   6   5   1 15.8018 17.3254   2
   5   6  -1 -7.0871 17.7538   2
  -6  -5   1 -4.7120 13.2319   4
   6  -5  -1 15.7270 17.7641   4
  -6  -5   1 29.2750 17.0958   3
  -5  -6  -1 -3.3913 13.7375   3
  -5   6  -1 -7.9013 12.4488   2
  -6  -5  -1 -2.3655 13.6191   2
  -6   5   1 19.8123 9.95841   2
  -5   6  -1 6.98433 11.1311   2
  -6  -5  -1 8.96620 10.4273   4
  -5   6  -1 -5.1469 17.1646   1
   5  -6  -1 -1.7001 13.2076   4
   6  -5   1 -15.573 12.9559   4
  -5  -6   1 -9.6642 18.0578   2
   6  -5   1 12.4866 8.19158   2
   5  -6  -1 -3.9185 3.67176   2
  -6   5   1 5.80095 9.40653   2
   5   6   1 -15.270 18.0477   2
  -5  -6   1 -1.1003 9.04766   4
   5   6   1 -3.9887 12.5776   5
  -6   5   1 -10.132 14.8000   1
   6   5  -1 -8.2952 16.6001   2
   6   5  -1 8.98114 9.45500   5
  -6  -5  -1 13.9164 13.6811   3
  -5  -6   1 -13.689 16.5062   3
   0   7  -1 -6.5292 10.8068   5
  -7   0   1 -2.9733 9.34084   2
  -7   0  -1 0.29273 3.71614   5
   0  -7   1 4.75567 16.1936   3
   0  -7  -1 9.14122 10.4112   4
  -7   0  -1 9.25549 7.90881   3
   0   7  -1 19.4315 17.4819   1
  -7   0  -1 4.70037 10.1959   2
  -7   0   1 10.1599 8.85808   3
   0   7   1 11.6746 17.6205   2
   0   7   1 -15.403 15.0167   1
   0   7  -1 5.40699 14.5360   2
   7   0  -1 -33.825 15.7429   4
   7   0   1 3.45553 4.31529   2
   0  -7   1 -7.2388 16.6739   2
   0   7   1 14.6036 14.1921   5
   0  -7  -1 -13.058 12.7679   2
   7   0   1 20.7538 14.5109   4
  -7   0  -1 -8.6127 10.5606   2
  -7   0  -1 -3.5947 3.99277   5
  -7   0   1 -8.1173 8.82625   2
   0  -7  -1 -13.463 15.0594   3
   7   0  -1 -2.3759 7.68986   2
  -2  -7  -1 128.830 24.5220   2
  -7   2  -1 125.669 16.8246   2
  -7  -2   1 127.341 17.7594   2
  -7  -2   1 110.576 14.3599   5
  -7   2  -1 141.080 15.5089   2
   2  -7   1 133.973 18.9844   3
   2   7  -1 158.136 21.6872   1
  -2   7   1 168.351 23.2644   1
  -2  -7  -1 118.098 20.2399   3
   7  -2  -1 116.566 20.6734   4
  -7  -2   1 154.954 18.4663   2
  -2   7   1 116.018 16.1247   5
  -7   2  -1 109.456 12.7937   3
   2  -7   1 139.644 21.0748   2
   2   7  -1 152.595 21.2528   5
   2   7  -1 114.313 21.6979   2
  -2   7   1 131.028 18.7433   2
  -7  -2   1 101.598 17.3520   3
   7   2   1 124.485 17.3465   2
   2  -7   1 111.942 17.9194   4
   7   2   1 91.2024 19.5667   4
   2  -7  -1 132.556 18.5386   2
   7   2  -1 124.594 21.5503   4
  -2  -7   1 107.826 22.3902   3
   2   7   1 104.577 17.4823   5
  -7  -2  -1 106.273 17.8664   2
   7   2  -1 110.052 16.4903   2
  -2   7  -1 153.449 21.8182   2
  -7  -2  -1 117.465 15.4343   5
   7  -2   1 150.920 11.8610   2
  -2   7  -1 104.685 16.6458   5
  -2  -7   1 125.587 21.9712   2
   7  -2   1 128.507 23.1763   4
   2   7   1 95.8683 20.5441   2
  -7   2   1 122.285 12.9176   2
  -2   7  -1 118.183 23.9733   1
   2  -7  -1 100.390 17.2249   4
   2   7   1 107.641 19.1808   1
  -7   2   1 116.678 14.0433   3
   2  -7  -1 127.138 19.5866   3
  -7  -2  -1 114.113 17.0757   3
  -7   2   1 120.586 14.2290   2
   7  -4  -1 -8.0089 14.1624   4
  -7   4  -1 -0.1687 8.13284   2
   4   7  -1 -15.096 14.7807   2
  -4  -7  -1 8.32280 14.1432   3
  -7   4  -1 -12.845 13.2719   1
   4  -7   1 28.0081 12.2041   2
   7   4   1 19.0701 16.0686   2
  -7   4  -1 -2.4750 10.8160   2
  -4   7   1 3.16388 12.7467   2
   4  -7   1 12.9257 16.2918   4
  -7  -4   1 -9.0716 15.3447   2
  -4  -7  -1 27.9645 16.8034   2
  -7  -4   1 -5.7252 12.4358   3
   7   4   1 -1.2441 6.90708   5
  -4   7   1 -5.5073 17.4792   1
   4   7  -1 11.1483 11.9139   5
  -4  -7   1 -21.213 14.1593   3
  -7   4   1 8.00918 9.08015   2
   4   7   1 7.57509 14.7823   5
   7   4  -1 -3.1562 3.92417   5
   4  -7  -1 -14.427 14.7854   4
  -7  -4  -1 -12.521 15.0349   2
  -7   4   1 11.2538 13.2270   1
   7  -4   1 10.8545 6.14366   2
  -7  -4  -1 0.37750 14.4272   3
  -4   7  -1 5.30045 10.3995   5
   7   4  -1 12.9410 15.0985   2
  -4   7  -1 -15.415 19.0610   1
   4  -7  -1 11.8575 11.7136   2
   7  -4   1 -1.4857 14.6482   4
  -4  -7   1 41.9298 20.6612   2
   4   7   1 14.1834 16.4773   2
  -7   4   1 0.75861 6.97228   2
  -4   7  -1 5.94112 12.7628   2
   6   7  -1 -4.6596 12.3062   5
   7  -6  -1 13.7081 7.67802   2
   7   6   1 27.7729 13.0838   5
  -7   6  -1 29.2735 11.4461   2
  -6  -7  -1 44.2662 12.3597   4
   6  -7   1 21.9215 18.2472   4
  -6  -7  -1 27.0429 17.6333   2
   7   6   1 8.42887 15.0725   2
  -7   6  -1 31.0429 19.1207   1
  -6  -7  -1 6.70653 18.4946   3
  -7  -6   1 10.9319 17.5527   3
   7  -6  -1 29.4590 16.3856   4
  -6   7   1 31.0167 11.9746   2
  -6   7   1 26.2399 11.6569   2
   6  -7   1 18.7327 7.77678   2
  -7   6  -1 21.1741 11.1899   2
   6   7  -1 21.2724 17.1152   2
  -6   7   1 15.9874 15.8511   1
  -7  -6   1 36.6507 19.1292   2
   6   7   1 25.2176 14.2388   5
   7   6  -1 14.9049 11.8514   5
   7  -6   1 24.0246 16.5487   4
   7   6  -1 40.2560 19.0942   2
  -6   7  -1 7.84768 16.3954   1
   6  -7  -1 5.91416 5.62577   2
  -7  -6  -1 48.3097 20.6179   2
  -6  -7   1 39.4256 17.0823   3
  -7   6   1 7.74676 14.2628   1
   6   7   1 -0.8426 19.6048   2
  -6  -7   1 19.0853 16.6440   2
  -7  -6  -1 31.6171 18.2847   3
  -6   7  -1 24.2434 8.17868   5
   6  -7  -1 17.1329 15.3012   4
   7  -6   1 21.4380 8.31937   2
  -6   7  -1 31.0484 12.3302   2
  -7   6   1 37.8580 11.5718   2
  -7   6   1 24.2462 10.6757   2
  -6   7  -1 31.8173 13.3118   2
  -8   1  -1 3.98447 9.64347   2
  -1   8   1 -4.2787 12.9842   5
  -8   1  -1 18.2326 9.51979   2
  -8  -1   1 2.18307 12.2750   2
  -1  -8  -1 -17.874 14.2175   2
   1   8  -1 2.72441 12.2655   5
  -8   1  -1 -0.5116 7.67322   3
   1  -8   1 -8.5890 11.9142   3
   1   8  -1 24.2859 15.5067   1
  -1  -8  -1 19.2969 14.4702   3
   8  -1  -1 2.60014 7.01697   2
   8  -1  -1 12.5244 14.9849   4
  -1   8   1 2.10101 12.7646   1
   1  -8   1 -17.248 16.2760   2
  -8  -1   1 -3.0474 9.88345   3
  -8  -1   1 26.0159 12.1836   2
   8   1   1 -0.4780 16.9039   4
   8   1   1 11.5314 11.2515   2
  -8  -1   1 1.85309 5.51278   5
   1   8  -1 -7.4734 15.0687   2
   1  -8   1 -2.1945 11.4185   4
  -1   8   1 -9.8352 13.1689   2
   1   8   1 23.6095 16.1783   2
   1  -8  -1 -9.2090 12.0785   3
   1   8   1 -20.903 15.6842   1
  -8   1   1 19.8651 9.48308   2
  -8   1   1 13.7394 8.32172   2
  -8   1   1 1.57932 8.69590   3
   8  -1   1 8.94039 9.81598   2
  -1   8  -1 -0.0525 13.4356   5
   1  -8  -1 -22.219 15.6179   2
   8   1  -1 -1.6462 8.24238   2
  -1  -8   1 -13.596 13.2596   3
  -1   8  -1 -6.3170 13.8970   1
   1   8   1 -9.5385 11.6332   5
   8  -1   1 4.35930 15.7297   4
   1  -8  -1 2.78249 10.6599   4
   8   1  -1 -24.651 16.3966   4
  -8  -1  -1 6.54859 6.28441   5
  -1  -8   1 -15.883 14.6587   2
  -1   8  -1 4.51127 17.1005   2
  -8  -1  -1 -3.5957 10.3934   3
  -8  -1  -1 2.66921 10.1222   2
  -8  -1  -1 0.88453 11.2224   2
  -3  -8  -1 0.83487 15.4775   2
  -3   8   1 5.15718 10.6701   5
  -3   8   1 10.4717 14.7404   2
   3   8  -1 12.6194 15.7851   1
   3  -8   1 13.0560 14.7897   4
  -8   3  -1 6.31562 7.25428   3
  -3   8   1 -3.6218 17.1635   1
   8  -3  -1 8.45800 15.0347   4
  -8  -3   1 -15.170 11.2406   2
   3  -8   1 25.9153 14.0435   3
   8   3   1 -7.5101 12.9849   2
  -8  -3   1 2.62409 13.3121   3
   3  -8   1 3.48568 13.9043   2
   3   8  -1 11.7967 20.0453   2
  -3  -8  -1 13.9615 18.7675   3
  -8   3  -1 -18.021 10.8392   2
   8   3   1 8.04280 15.8645   4
   3   8  -1 48.2402 17.1690   5
  -8   3  -1 -0.8361 9.57801   2
  -8   3   1 14.0815 8.04697   3
   3   8   1 -12.988 15.4778   5
  -8   3   1 -1.8298 9.32501   2
  -8  -3  -1 19.1175 14.6250   2
   3  -8  -1 0.51101 13.9491   2
  -8   3   1 19.6150 8.23907   2
   8  -3   1 -7.7273 17.9718   4
   8   3  -1 -14.968 11.8126   2
  -3  -8   1 7.87348 17.1288   2
  -8  -3  -1 27.1146 14.2526   3
   3   8   1 9.94786 18.3571   1
   3  -8  -1 6.31047 13.8294   4
   3   8   1 23.2467 17.0090   2
  -3   8  -1 5.35904 15.0478   2
  -3   8  -1 4.81823 11.7637   5
  -3   8  -1 20.2849 19.9168   1
  -3  -8   1 -6.4199 17.5030   3
  -8   5  -1 53.2515 13.1163   2
   8  -5  -1 34.7478 20.1121   4
  -5   8   1 19.3143 16.6685   1
  -8   5  -1 27.1325 10.0489   2
   8   5   1 47.8258 18.7183   2
   5  -8   1 11.4763 13.9198   2
  -5  -8  -1 59.7960 11.6004   4
  -5  -8  -1 51.9500 19.1883   2
   5   8  -1 44.3338 18.5461   2
  -8   5  -1 33.2999 20.0347   1
   5   8  -1 49.6619 17.1946   5
  -5   8   1 23.2714 13.7352   2
  -8  -5   1 0.01548 16.4145   3
   8   5   1 55.4523 10.0482   5
  -8  -5   1 13.0310 17.9015   2
  -5  -8  -1 48.8309 18.3392   3
  -8   5  -1 51.9555 10.2503   3
   5  -8   1 10.2124 17.4176   4
   8   5  -1 54.5127 17.9435   2
   8  -5   1 19.1277 17.3122   4
  -8  -5  -1 76.4722 20.1932   2
   5  -8  -1 39.3825 18.3854   4
  -5   8  -1 36.3606 14.9258   2
  -5   8  -1 37.0946 12.4366   5
   5   8   1 26.5245 20.9586   2
  -5  -8   1 17.8747 20.3820   2
   5   8   1 47.9646 14.9957   5
  -5   8  -1 32.3236 22.6150   1
   5  -8  -1 55.1067 14.6007   2
  -8   5   1 27.7113 10.4661   2
  -8   5   1 34.4399 18.9921   1
   8   5  -1 17.1639 6.37937   5
  -5  -8   1 34.1399 20.3656   3
  -8  -5  -1 54.9156 18.2806   3
  -8   5   1 32.2359 9.90599   2
   8   7   1 32.1214 19.6868   2
  -8   7  -1 45.3562 12.9229   2
   8   7   1 33.3074 11.6809   5
  -8   7  -1 14.9648 20.5314   1
   7  -8   1 32.1438 17.9468   4
  -7   8   1 57.5809 21.0877   2
  -7   8   1 39.2246 12.6428   2
  -7  -8  -1 22.8168 17.6849   3
   8  -7  -1 42.2476 21.9131   4
  -8  -7   1 16.0008 16.1387   3
  -8  -7   1 35.0440 17.7624   2
  -7   8   1 26.2969 17.5476   1
   7   8  -1 14.1354 17.5748   2
   7   8  -1 26.8611 13.9706   5
  -8   7  -1 36.3993 14.3177   2
  -7  -8  -1 32.9600 18.5159   2
   8  -7   1 34.7581 9.41296   2
   8  -7   1 28.1853 18.1251   4
  -7  -8   1 18.4384 21.5619   2
   7  -8  -1 19.7576 9.94616   2
  -7  -8   1 6.33882 15.6261   3
   7  -8  -1 7.73227 19.4560   4
  -8   7   1 7.26911 18.1790   1
  -7   8  -1 15.7140 14.1077   2
  -7   8  -1 50.3755 10.5183   5
   8   7  -1 2.15485 19.7813   2
  -7   8  -1 30.1108 22.3989   1
  -8  -7  -1 21.5085 19.0639   3
  -8  -7  -1 12.4397 19.2570   2
   7   8   1 6.22941 17.6986   2
  -8   7   1 33.5326 12.5372   2
   8   7  -1 34.4070 11.8560   5
  -8   7   1 37.6037 11.8175   2
   7   8   1 25.5516 14.2751   5
   0   9  -1 -5.5150 16.9711   1
  -9   0  -1 -6.6106 8.77508   3
   0   9  -1 -22.271 17.1250   2
   0  -9   1 22.5503 17.9407   3
   0   9   1 6.01477 11.9637   5
  -9   0  -1 5.83877 5.08398   5
   0   9   1 -3.2112 13.0367   1
   0   9   1 8.41952 15.1975   2
  -9   0  -1 -1.7193 6.76522   5
   9   0   1 -7.2892 9.30358   2
  -9   0  -1 6.31405 8.99671   2
  -9   0  -1 -5.3018 11.3990   2
  -9   0   1 -2.8626 3.41864   5
   0  -9  -1 -9.7699 17.4426   2
   0  -9   1 -5.0607 11.3564   4
   0  -9  -1 3.35292 13.6556   3
  -9   0   1 -6.4786 10.3468   2
   0   9  -1 -9.3948 12.3356   5
   9   0  -1 -19.943 9.40570   2
   0  -9   1 16.1909 18.0529   2
  -9   0   1 -7.5820 8.36599   3
  -9   0   1 -7.1166 9.39674   2
   9   0  -1 -0.5000 14.6687   4
   9   0   1 4.09610 17.9466   4
  -9   0   1 13.0467 5.19113   5
   0  -9  -1 15.2111 10.9812   4
  -9   2  -1 7.12929 8.61969   2
   2  -9   1 8.11171 16.4557   2
  -9  -2   1 29.0305 13.5143   3
  -9   2  -1 5.86565 7.81303   3
   2   9  -1 1.05579 15.3883   1
   9  -2  -1 0.37878 19.4007   4
   2  -9   1 18.6760 15.6822   3
   2   9  -1 28.2114 14.5776   5
  -9  -2   1 14.0890 12.8533   2
  -2   9   1 29.4686 14.7971   5
  -2  -9  -1 30.2667 21.0401   2
   2   9  -1 -5.1740 15.2223   2
   9   2   1 -3.6312 10.9730   2
  -2   9   1 -3.8081 16.3726   2
   2  -9   1 6.74671 12.9605   4
  -2   9   1 -13.725 16.6551   1
  -9  -2   1 4.84999 8.54607   5
  -9   2  -1 9.36974 10.3050   2
  -2  -9  -1 -29.513 17.0787   3
   9   2   1 18.1278 17.5892   4
   9  -2   1 14.5744 19.6969   4
  -9   2   1 9.38714 8.36826   2
   2   9   1 12.7700 19.8014   2
  -9  -2  -1 11.3111 14.0742   3
   2  -9  -1 -5.6430 12.7688   2
  -2   9  -1 13.6624 14.2237   2
   9   2  -1 21.8140 12.0417   2
   2  -9  -1 7.36850 14.7133   4
  -9  -2  -1 1.22256 8.44567   5
   2   9   1 -10.633 17.2821   1
  -9   2   1 14.2760 10.2991   2
  -9   2   1 8.94088 8.23555   3
   2   9   1 23.0201 16.7347   5
   9   2  -1 -43.847 11.3095   4
  -2   9  -1 10.6204 18.4837   1
  -2   9  -1 -16.014 13.0827   5
   2  -9  -1 -38.817 14.0689   3
  -9  -2  -1 4.86185 12.7920   2
  -2  -9   1 -20.782 18.4148   2
  -2  -9   1 7.85415 15.3186   3
   9  -4  -1 31.9598 20.2778   4
  -4   9   1 -13.375 17.8617   1
  -9   4  -1 -6.4128 9.20426   2
   9   4   1 21.3457 12.6033   2
   4   9  -1 29.3950 19.1127   2
  -9  -4   1 -18.930 13.9958   3
  -9   4  -1 -10.921 10.1714   2
  -4  -9  -1 -15.206 15.1512   2
   4  -9   1 -29.215 14.0895   4
  -9   4  -1 1.85420 7.34679   3
  -4   9   1 -12.965 14.1236   2
   4  -9   1 21.2481 14.6110   2
  -4   9   1 9.22197 11.5706   5
   4   9  -1 -3.4371 12.8851   5
  -4  -9  -1 -0.9327 19.5352   3
  -9   4  -1 25.8747 16.2169   1
  -9  -4   1 10.3134 12.7662   2
  -9   4   1 2.16313 7.35007   2
   9  -4   1 27.0357 17.1446   4
  -9   4   1 15.0292 8.71607   3
  -4  -9   1 18.9483 17.1833   3
  -4   9  -1 25.7464 13.1904   5
  -4   9  -1 0.33187 20.1369   1
  -4   9  -1 5.22235 15.0902   2
  -9  -4  -1 -9.4877 11.1713   3
  -9  -4  -1 11.7497 15.5411   2
   4  -9  -1 -0.9523 14.8250   2
  -9   4   1 11.3244 14.4451   1
  -4  -9   1 -18.165 19.0561   2
   9   4  -1 -8.2139 13.5919   2
   4  -9  -1 11.4023 15.5693   4
  -9   4   1 1.91230 8.22082   2
   4   9   1 15.4173 16.3539   5
   4   9   1 12.4948 17.4071   2
   9   6   1 -6.7838 16.6987   2
  -9  -6   1 -6.5265 16.8699   3
  -9   6  -1 13.2825 12.5031   2
   6  -9   1 19.1654 15.9015   4
  -6   9   1 -7.6195 9.89048   5
   6   9  -1 16.8833 18.3754   2
  -9  -6   1 -0.2293 14.6198   2
  -9   6  -1 -24.226 18.9682   1
   6   9  -1 15.5128 12.7584   5
   9  -6  -1 5.19198 19.7372   4
   6  -9   1 14.5785 12.3157   2
  -6   9   1 5.86273 12.9428   2
  -6  -9  -1 1.25203 10.1461   4
  -6   9   1 -32.282 19.0173   1
  -9   6  -1 2.41843 10.4765   2
   9   6   1 5.69276 7.71797   5
  -6  -9  -1 22.6931 17.8555   3
  -6  -9  -1 -19.149 17.0709   2
  -9  -6  -1 13.2941 14.8859   3
   9   6  -1 12.5231 18.0606   2
  -9  -6  -1 14.5474 19.2496   2
  -6  -9   1 -0.0321 17.2934   3
  -6  -9   1 -7.7117 16.9480   2
  -6   9  -1 8.15187 13.2404   2
  -6   9  -1 -4.9033 11.2430   5
   9  -6   1 33.1466 21.2698   4
  -9   6   1 -24.278 13.5152   1
   6   9   1 20.4363 18.6052   2
   6   9   1 13.1016 13.1798   5
  -9   6   1 11.2140 10.6273   2
  -6   9  -1 -19.680 22.7762   1
   6  -9  -1 13.5469 11.6626   2
  -9   6   1 14.7208 9.06715   2
   6  -9  -1 31.9721 18.8104   4
   8   9  -1 23.6161 14.1222   5
  -9   8  -1 32.7172 24.7417   1
  -9  -8   1 -0.0634 20.1431   3
   9   8   1 15.7784 11.5639   5
  -9   8  -1 33.3314 9.52647   5
  -8   9   1 28.8845 14.3936   2
   9  -8  -1 8.98672 18.2072   4
   9   8   1 45.4421 22.3948   2
  -8  -9  -1 36.0572 20.6700   2
  -8   9   1 54.0959 11.8689   5
   8   9  -1 -3.8566 22.1549   2
  -8   9   1 37.2323 24.6842   1
  -8  -9  -1 1.35414 21.2996   3
  -9   8  -1 24.1139 12.9511   2
   8  -9   1 32.5819 22.2764   4
  -9  -8   1 5.70935 21.1515   2
  -8  -9   1 28.2775 18.6700   3
   9   8  -1 26.4854 18.1628   2
   8   9   1 10.2289 18.6645   2
   9  -8   1 41.6243 22.9543   4
   9   8  -1 33.6757 12.9962   5
  -8  -9   1 51.7133 21.7504   2
  -9  -8  -1 41.3344 20.8706   3
  -9   8   1 31.7946 12.0702   2
   8   9   1 24.8094 15.1208   5
  -8   9  -1 32.5147 11.3238   5
  -8   9  -1 48.0172 15.6643   2
  -9  -8  -1 29.3499 21.8797   2
  -9   8   1 19.4953 22.6527   1
  -8   9  -1 21.7000 25.0763   1
   8  -9  -1 28.0119 21.3442   4
   1 -10   1 -21.168 14.7537   3
  -1 -10  -1 27.4756 20.3478   2
   1  10  -1 -34.260 19.4043   2
 -10   1  -1 -3.2349 4.05706   5
  10   1   1 -59.527 15.8552   4
  -1 -10  -1 7.98636 11.0396   4
   1  10  -1 28.2861 17.6871   5
   1 -10   1 6.97244 18.4469   2
 -10  -1   1 -10.950 10.1678   2
 -10   1  -1 -18.333 9.34146   2
   1 -10   1 -10.276 11.3041   4
 -10   1  -1 -17.494 7.29403   3
 -10   1  -1 4.19437 4.70907   5
  -1  10   1 3.76973 18.0114   2
 -10  -1   1 0.32499 10.1458   2
  10  -1  -1 -12.528 14.7212   4
 -10  -1   1 4.14501 10.7116   3
 -10  -1   1 2.54623 5.88475   5
  -1 -10  -1 38.8893 16.8705   3
  -1  10   1 -13.670 11.2124   5
 -10   1  -1 1.84968 10.2357   2
  -1  10   1 5.33945 17.5422   1
   1  10  -1 24.8973 19.5571   1
  -1  10  -1 -21.937 17.1995   2
   1 -10  -1 -0.5975 12.6795   4
  -1  10  -1 3.38967 17.8144   1
  -1 -10   1 7.77281 16.5857   2
   1 -10  -1 -2.0901 17.1699   2
 -10   1   1 4.98450 9.42921   2
 -10  -1  -1 6.92739 10.9154   2
   1  10   1 13.0730 17.3333   1
  10   1  -1 -15.935 18.6156   4
 -10  -1  -1 6.57847 7.44243   5
   1  10   1 19.3954 16.9813   2
   1 -10  -1 26.0677 14.9099   3
 -10  -1  -1 9.95217 12.5522   2
  10  -1   1 26.5481 9.12050   2
  -1 -10   1 -15.169 13.3895   3
 -10  -1  -1 -0.7101 12.0316   3
 -10   1   1 -19.753 8.54767   3
  -1  10  -1 -21.756 13.8088   5
 -10   1   1 -8.7195 9.78133   2
  10  -1   1 -1.9472 15.1601   4
   1  10   1 19.6740 16.3565   5
   3 -10   1 5.27007 15.5719   2
  -3  10   1 47.3536 18.9362   2
   3 -10   1 -0.2408 13.8446   4
 -10   3  -1 11.4889 13.3658   2
   3  10  -1 18.0723 20.5848   1
  -3  10   1 -14.484 12.6929   5
 -10   3  -1 15.9706 8.25154   3
 -10   3  -1 19.5618 9.81378   2
   3  10  -1 51.2749 19.3776   5
  10   3   1 17.5418 14.8419   2
  10   3   1 26.8485 18.9922   4
  -3 -10  -1 -5.7188 19.1079   3
  -3 -10  -1 -12.078 20.1723   2
 -10  -3   1 62.6491 18.5089   2
   3 -10   1 11.6963 15.1727   3
   3  10  -1 20.2431 18.9130   2
 -10  -3   1 24.5039 15.3205   3
  10  -3  -1 14.2281 17.0738   4
  -3  10   1 2.99348 17.9456   1
   3  10   1 24.9158 16.7673   1
  10   3  -1 38.0210 14.7646   2
 -10   3   1 16.1033 11.3611   2
  10  -3   1 -6.1660 20.1813   4
   3 -10  -1 44.0110 17.5735   4
  -3  10  -1 15.3719 17.9542   2
  -3  10  -1 18.2974 14.2223   5
 -10  -3  -1 2.65607 15.5319   3
   3 -10  -1 26.0712 16.8021   2
   3  10   1 58.9609 21.0884   2
 -10   3   1 21.4656 9.47644   3
   3  10   1 18.5010 17.7427   5
  -3  10  -1 20.6669 20.4082   1
  -3 -10   1 34.8664 20.1409   2
  -3 -10   1 20.6172 20.3901   3
 -10  -3  -1 34.4488 16.2665   2
 -10   3   1 21.7989 8.26571   2
   5 -10   1 20.7732 17.5447   4
  10  -5  -1 24.2058 18.3924   4
 -10   5  -1 28.8141 21.7000   1
  -5 -10  -1 21.3643 18.0603   3
   5  10  -1 19.2385 17.6534   5
  -5  10   1 -2.9708 15.5003   2
  -5 -10  -1 59.5170 21.5390   2
  -5  10   1 17.8186 21.3950   1
  -5  10   1 9.50439 13.6733   5
  10   5   1 10.7703 16.1155   2
 -10   5  -1 4.32961 9.36275   2
 -10   5  -1 20.6951 18.9332   2
 -10  -5   1 31.2671 18.6069   2
 -10   5  -1 6.09325 7.73081   3
 -10  -5   1 14.1381 16.7205   3
   5 -10   1 24.7170 14.3330   2
   5  10  -1 27.0598 23.2653   2
 -10  -5  -1 35.8439 15.6769   3
 -10  -5  -1 34.6596 19.3453   2
  -5 -10   1 44.9106 19.6467   2
   5  10   1 22.5578 19.6857   2
  -5 -10   1 52.4279 22.3297   3
 -10   5   1 25.4196 9.78403   3
   5 -10  -1 24.9811 17.4943   4
 -10   5   1 47.1996 17.6251   1
 -10   5   1 11.7120 9.59022   2
   5 -10  -1 26.8354 15.4099   2
  10  -5   1 2.89320 17.0534   4
  -5  10  -1 19.4570 23.5173   1
  -5  10  -1 7.42451 12.8252   5
   5  10   1 46.4424 18.5728   5
 -10   5   1 14.0705 8.34941   2
  -5  10  -1 45.6597 17.7904   2
  10   5  -1 38.1233 16.7957   2
 -10   7  -1 1.68633 5.59840   5
 -10   7  -1 10.9693 11.2401   2
  -7  10   1 -2.5310 11.3325   5
   7 -10   1 -22.529 18.2434   4
  -7 -10  -1 8.81558 22.1050   3
  -7  10   1 10.0180 13.8944   2
 -10  -7   1 -6.5838 18.0380   3
 -10   7  -1 2.05148 17.8028   1
   7  10  -1 -5.8895 18.0248   2
   7  10  -1 14.2207 15.7441   5
  10  -7  -1 -17.166 16.9194   4
 -10  -7   1 15.6424 16.1661   2
  10   7   1 15.6490 19.3451   2
  -7 -10  -1 -6.3277 22.8030   2
  -7  10   1 12.3961 24.6203   1
   7  10   1 -36.155 21.8932   2
 -10  -7  -1 -17.428 18.8816   2
  -7 -10   1 -37.765 20.5512   2
   7  10   1 -18.222 15.2522   5
  -7 -10   1 -7.0354 21.1284   3
  10   7  -1 38.1715 19.9324   2
  -7  10  -1 -22.671 14.9403   2
  -7  10  -1 0.44713 10.4232   5
  10  -7   1 12.7116 22.3548   4
   7 -10  -1 -12.014 17.8927   4
 -10  -7  -1 11.0466 18.8312   3
  -7  10  -1 5.05403 25.3210   1
 -10   7   1 -18.733 8.55685   2
 -10   7   1 -11.546 17.1853   1
 -10   9  -1 -0.5570 12.7138   2
  -9 -10  -1 -14.290 16.4741   2
  -9  10   1 -4.1563 25.4642   1
  10  -9  -1 -31.681 16.3993   4
  -9  10   1 -1.5032 10.0883   5
   9  10  -1 -18.567 17.9836   2
 -10  -9   1 -8.8941 20.9980   2
 -10   9  -1 -7.6972 24.5586   1
 -10  -9   1 34.4934 19.1943   3
  10   9   1 26.2564 22.3223   2
  -9  10   1 15.1610 13.5724   2
   9 -10   1 40.5176 20.9991   4
 -10   9  -1 11.0861 9.78167   5
  -9 -10  -1 1.49760 22.1916   3
 -10  -9  -1 4.75026 21.9919   3
  -9  10  -1 11.6194 14.5071   2
 -10   9   1 -8.9332 23.9956   1
 -10   9   1 23.2017 11.9180   2
  -9 -10   1 25.1674 24.3139   2
  -9  10  -1 -0.0687 11.1407   5
  10  -9   1 9.81557 23.8710   4
  -9  10  -1 -27.383 26.8083   1
  -9 -10   1 -15.274 18.0757   3
   9  10   1 -28.765 20.7750   2
 -10  -9  -1 10.7969 19.2549   2
   9 -10  -1 0.82704 18.4345   4
 -10   9   1 3.63912 8.26136   5
  10   9  -1 -27.134 15.0844   2
   0 -11   1 26.9077 13.6077   4
   0  11  -1 24.5482 20.4842   1
 -11   0  -1 4.07682 9.98038   3
   0 -11  -1 -32.641 17.3572   2
   0 -11  -1 -7.3508 12.2019   4
  11   0  -1 18.2565 20.1048   4
 -11   0   1 3.82374 8.80414   5
 -11   0  -1 -17.776 10.1248   5
   0  11  -1 26.6943 21.6196   2
   0 -11   1 8.58696 15.6119   2
  11   0   1 11.2976 20.0829   4
   0  11   1 -21.755 12.2211   5
   0  11   1 19.1346 18.6531   1
   0  11   1 15.7655 16.4826   2
   0 -11  -1 8.63460 18.4028   3
 -11   0   1 -5.6892 11.1943   2
   0  11  -1 -17.528 12.6796   5
 -11   0  -1 -6.5306 12.0187   2
 -11   0   1 6.11341 5.59084   5
 -11   0  -1 -4.9916 6.26897   5
   0 -11   1 0.06475 18.6324   3
 -11   0   1 -22.059 9.36936   3
  -2 -11  -1 -45.035 18.0728   2
  -2  11   1 20.6865 15.6641   5
 -11  -2   1 -13.490 12.0288   2
   2 -11   1 23.7715 18.1383   2
 -11   2  -1 -27.875 11.6191   2
   2  11  -1 2.09325 13.9266   5
   2 -11   1 2.81159 13.0712   3
   2  11  -1 11.0387 20.8201   1
  -2 -11  -1 -1.5083 9.86262   4
   2 -11   1 2.06397 15.5695   4
 -11   2  -1 -6.1151 7.75697   3
  -2 -11  -1 18.0296 20.9189   3
 -11  -2   1 16.2021 15.2877   3
   2  11  -1 -17.312 16.8840   2
  -2  11   1 2.65342 17.5605   1
  -2  11   1 2.71066 15.4581   2
  11   2   1 -9.9308 18.0764   4
  11   2   1 10.3234 12.5911   2
  11  -2  -1 9.12403 18.2032   4
   2  11   1 1.52689 19.5792   1
  11   2  -1 19.6208 12.1981   2
   2  11   1 -14.633 16.2564   2
   2 -11  -1 3.26965 17.5587   2
   2 -11  -1 -14.374 12.9273   3
 -11  -2  -1 15.3435 13.7894   2
 -11   2   1 -12.563 7.73424   3
   2  11   1 0.36750 17.4987   5
  -2  11  -1 -10.567 17.6253   2
  -2 -11   1 34.2979 20.9355   3
 -11   2   1 -23.312 9.21845   2
  -2  11  -1 15.8103 20.7596   1
  -2 -11   1 -32.805 19.7835   2
  11  -2   1 3.81008 21.7788   4
  11   2  -1 -6.9455 19.2437   4
 -11  -2  -1 5.68429 12.6091   3
   2 -11  -1 -11.216 14.2147   4
  -2  11  -1 11.8367 13.4137   5
 -11   4  -1 31.8578 19.7165   1
 -11   4  -1 52.0517 9.10147   3
  -4 -11  -1 40.1813 24.8027   2
  -4  11   1 23.6061 22.0328   1
 -11  -4   1 30.2234 16.9942   3
  -4  11   1 26.0156 14.8847   2
   4 -11   1 60.0530 18.1169   4
   4 -11   1 40.7574 18.2490   2
   4  11  -1 88.2022 23.6739   2
 -11   4  -1 30.2419 12.4192   2
  11   4   1 33.1944 15.3258   2
   4  11  -1 12.0623 16.3376   5
  -4 -11  -1 33.9057 22.4592   3
  -4  11   1 28.7065 15.3742   5
 -11  -4   1 42.2922 17.9781   2
  11  -4  -1 29.8647 22.9445   4
   4  11   1 43.5426 21.6327   2
 -11  -4  -1 19.8764 16.3605   3
 -11   4   1 7.84995 18.0048   1
  -4  11  -1 7.29451 15.1304   5
  11  -4   1 -5.0730 17.7598   4
  -4 -11   1 14.6040 18.6080   3
  -4 -11   1 4.72760 21.8892   2
  11   4  -1 54.8994 15.9745   2
 -11   4   1 27.5584 10.2850   2
   4  11   1 7.65698 18.6714   5
 -11  -4  -1 21.3751 17.4306   2
   4 -11  -1 17.8140 16.0051   2
 -11   4   1 21.1103 9.80920   3
   4 -11  -1 31.2580 17.1758   4
  -4  11  -1 42.4469 20.0789   2
  -4  11  -1 27.2129 22.5030   1
 -11   6  -1 32.8007 11.8250   2
  -6 -11  -1 27.7774 19.6512   3
  -6  11   1 15.1586 19.2205   1
 -11  -6   1 6.70134 18.9848   2
   6  11  -1 27.6014 18.8509   5
  -6  11   1 25.0382 13.7441   5
  11   6   1 61.8598 19.2687   2
  -6  11   1 31.0072 16.8785   2
  -6 -11  -1 38.7576 24.6492   2
   6  11  -1 56.9654 26.6007   2
 -11  -6   1 34.8833 19.3818   3
   6 -11   1 18.8514 16.3479   4
  11  -6  -1 44.4622 21.3812   4
 -11   6  -1 45.2600 24.3993   1
 -11   6   1 23.5645 9.45913   2
  11  -6   1 -26.488 22.6773   4
  -6 -11   1 44.2326 24.8291   3
   6  11   1 39.6637 21.9593   2
 -11   6   1 0.52262 21.0889   1
 -11  -6  -1 39.7803 17.3102   2
   6 -11  -1 46.0537 20.9400   4
 -11  -6  -1 43.2522 16.8618   3
  -6  11  -1 34.6618 25.5924   1
  11   6  -1 16.2655 17.6399   2
  -6 -11   1 24.5884 24.6819   2
  -6  11  -1 24.5516 14.4968   5
  -6  11  -1 48.9781 18.0655   2
   6  11   1 49.3714 20.5051   5
  -8 -11  -1 -15.379 24.1814   2
  -8  11   1 50.4032 27.3390   1
  -8 -11  -1 9.53902 19.4503   3
   8  11  -1 69.7757 23.6389   2
 -11  -8   1 17.0829 21.5004   3
  11  -8  -1 30.3129 24.5458   4
 -11   8  -1 36.2247 13.1798   2
 -11   8  -1 24.2063 8.82111   5
  11   8   1 11.9007 20.8772   2
 -11   8  -1 31.1627 26.4822   1
  -8  11   1 37.9869 15.6434   2
 -11  -8   1 27.2222 19.7242   2
   8 -11   1 28.0882 18.5441   4
   8  11  -1 23.7613 16.4237   5
  -8  11   1 35.9016 14.3068   5
  -8  11  -1 46.1648 28.6316   1
 -11  -8  -1 49.0749 18.5070   3
  11  -8   1 22.3190 20.2282   4
   8  11   1 -27.140 22.6306   2
  -8  11  -1 31.2551 13.5050   5
  -8 -11   1 10.1885 20.3640   2
  -8 -11   1 3.75857 23.7619   3
  11   8  -1 38.5933 18.5930   2
  -8  11  -1 8.15955 17.1663   2
 -11   8   1 28.5841 10.9551   2
 -11  -8  -1 -9.6093 17.2104   2
 -11   8   1 38.3176 25.5570   1
   8 -11  -1 32.5876 19.2744   4
   8  11   1 32.1540 17.8205   5
 -11  10  -1 -3.5192 27.9283   1
  10 -11   1 16.0685 24.1036   4
 -10 -11  -1 9.99667 25.4709   2
  11 -10  -1 -4.3300 18.6686   4
 -10  11   1 3.68089 14.6045   2
 -11 -10   1 11.4089 21.5404   2
 -11 -10   1 24.4712 23.7829   3
 -10  11   1 46.8592 30.1248   1
  11  10   1 -7.2029 21.4502   2
 -10 -11  -1 15.7681 23.7439   3
 -10  11   1 8.83831 11.7710   5
  10  11  -1 -58.104 21.2843   2
 -11  10  -1 -22.073 10.6777   5
 -11  10  -1 2.45916 12.0180   2
 -11 -10  -1 -10.621 18.5662   3
 -10 -11   1 -15.688 24.2749   3
 -10 -11   1 -6.0320 19.8327   2
 -11  10   1 -9.1752 9.73496   5
  10  11   1 -5.8370 20.1126   2
 -11 -10  -1 -3.9320 18.9711   2
 -10  11  -1 9.77481 15.0826   2
 -10  11  -1 -52.307 20.6906   1
  11 -10   1 -5.8652 23.1174   4
 -11  10   1 -34.781 25.2649   1
 -11  10   1 14.5009 13.6069   2
  10 -11  -1 9.98710 19.4295   4
 -10  11  -1 -8.2785 12.0150   5
  11  10  -1 -12.919 20.9148   2
   1 -12   1 18.0060 19.5114   3
  -1 -12  -1 -7.0683 11.5382   4
   1  12  -1 -0.9752 17.6783   5
 -12   1  -1 12.0187 12.8346   2
  12   1   1 2.29329 20.7567   4
  -1 -12  -1 1.16732 20.2455   3
 -12   1  -1 4.71127 10.3800   3
  -1 -12  -1 -11.442 16.8665   2
   1  12  -1 2.14933 22.8239   2
  -1  12   1 -13.464 15.9610   5
 -12   1  -1 -7.4448 8.36722   5
   1 -12   1 16.4035 14.9218   4
  12  -1  -1 36.5962 19.4476   4
 -12  -1   1 -18.892 12.4376   3
   1  12  -1 4.83067 17.2034   1
  -1  12   1 -25.372 17.3927   1
 -12  -1   1 -3.2176 13.2014   2
   1 -12   1 14.2481 20.3055   2
  -1  12   1 -11.580 20.2289   2
   1 -12  -1 5.77578 13.4358   4
 -12   1   1 -12.352 8.96382   3
   1 -12  -1 -1.9453 19.2148   3
 -12  -1  -1 10.0821 12.6148   2
  -1 -12   1 5.76723 21.2334   3
  12   1  -1 -34.730 19.2009   4
   1  12   1 3.71564 15.2338   5
   1  12   1 -12.719 19.4227   1
  -1 -12   1 1.50453 12.1571   4
   1  12   1 13.9485 18.6979   2
  -1  12  -1 4.70492 20.8582   2
  12  -1   1 4.63246 21.4146   4
  -1  12  -1 -16.432 16.5472   5
   1 -12  -1 30.0875 20.4721   2
  -1 -12   1 -17.982 17.0943   2
 -12   1   1 -9.4832 11.4686   2
 -12  -1  -1 -15.508 12.0555   3
 -12   1   1 -4.4505 6.01530   5
  -1  12  -1 1.68097 17.0243   1
   3  12  -1 88.5864 26.1754   1
   3  12  -1 57.0357 27.1572   2
   3 -12   1 93.0678 22.4854   2
  -3 -12  -1 84.6120 14.0946   4
 -12  -3   1 107.266 22.4535   2
  12  -3  -1 93.4635 23.9442   4
  -3 -12  -1 50.2240 26.4729   2
 -12   3  -1 66.2493 17.0010   2
  -3  12   1 80.4260 22.8525   2
   3 -12   1 101.382 22.6871   3
  -3 -12  -1 63.6192 22.6394   3
   3  12  -1 85.3593 23.5244   5
 -12  -3   1 101.561 20.0281   3
  12   3   1 119.914 26.3587   4
  -3  12   1 71.8821 17.5496   5
  -3  12   1 89.0487 23.9599   1
   3 -12   1 85.9123 19.3213   4
   3  12   1 113.860 24.7401   5
 -12  -3  -1 83.4110 19.5203   2
  -3  12  -1 134.830 28.4779   1
 -12   3   1 112.664 13.7974   3
 -12  -3  -1 105.096 18.6748   3
   3 -12  -1 79.3498 18.8738   4
  12  -3   1 108.875 27.5914   4
 -12   3   1 71.2168 15.9669   2
   3 -12  -1 75.3167 21.4776   2
  -3 -12   1 90.0375 26.5645   3
  -3  12  -1 128.805 25.3918   2
   3  12   1 121.455 29.8792   2
   3  12   1 87.8902 26.5775   1
  -3  12  -1 67.0010 20.0563   5
  -3 -12   1 88.0643 24.8406   2
  -5  12   1 3.67657 21.7969   1
  -5 -12  -1 -7.1405 19.6820   2
   5  12  -1 -42.873 23.2937   2
 -12   5  -1 14.8755 23.0723   1
  12  -5  -1 -33.695 17.1337   4
  -5 -12  -1 11.9285 19.3064   3
 -12   5  -1 -12.172 8.30138   2
  -5  12   1 -1.4738 17.2145   2
   5  12  -1 8.80476 18.1055   5
  -5  12   1 0.42913 14.3714   5
   5 -12   1 17.1782 18.8101   4
 -12  -5   1 -20.930 15.4774   3
 -12  -5   1 -2.5809 17.1959   2
  -5  12  -1 -4.6369 22.6525   1
   5  12   1 27.1232 21.7040   2
 -12   5   1 16.7463 8.37066   2
  -5 -12   1 32.3858 20.5823   2
   5 -12  -1 13.5204 17.4763   4
  -5  12  -1 -10.096 15.0185   5
 -12   5   1 30.4444 19.9495   1
   5  12   1 -11.877 18.1421   5
  -5  12  -1 16.1491 17.5019   2
  -5 -12   1 -12.941 22.0747   3
  12  -5   1 25.8198 24.4238   4
 -12  -5  -1 -9.4178 16.9125   2
 -12  -5  -1 12.0994 17.1334   3
   7  12  -1 -5.6032 17.1424   5
 -12   7  -1 -34.458 21.0459   1
   7 -12   1 23.7862 21.7857   4
 -12   7  -1 4.88686 9.44264   2
  -7 -12  -1 22.6204 24.8209   3
   7  12  -1 18.7314 26.4324   2
  -7 -12  -1 14.3339 26.6178   2
 -12   7  -1 -3.5784 5.73217   5
  12  -7  -1 12.0925 20.1746   4
 -12  -7   1 1.54221 20.4862   2
  -7  12   1 -44.974 23.6519   1
  -7  12   1 25.3440 16.9467   2
  -7  12   1 15.6847 13.8634   5
 -12  -7   1 -5.9018 18.8138   3
 -12  -7  -1 -2.6348 19.1350   3
   7  12   1 37.6667 18.4571   5
   7 -12  -1 27.9060 21.0345   4
 -12  -7  -1 -22.412 20.2628   2
  -7  12  -1 -8.0994 14.1377   5
  -7 -12   1 36.4459 22.8201   2
  -7  12  -1 11.2160 26.6361   1
   7  12   1 -5.7687 25.3505   2
 -12   7   1 -15.969 8.17062   2
 -12   7   1 21.7817 23.3506   1
  12  -7   1 13.1898 21.0197   4
  -7 -12   1 22.7060 20.7986   3
  -7  12  -1 4.39816 19.8271   2
  -9  12   1 14.3004 14.6059   2
 -12   9  -1 -13.725 12.4197   2
 -12   9  -1 4.10320 9.15841   5
  -9 -12  -1 -5.1016 23.4120   3
   9  12  -1 34.0809 27.1649   2
   9 -12   1 8.41837 18.7106   4
 -12   9  -1 -38.158 19.1644   1
  -9  12   1 33.1146 28.3227   1
  -9  12   1 6.58119 12.6473   5
 -12  -9   1 32.8181 25.7815   2
  12  -9  -1 -2.5932 21.0500   4
  -9 -12  -1 41.1093 23.0709   2
 -12  -9   1 -34.944 15.2863   3
  -9  12  -1 25.5265 15.9274   2
  12  -9   1 2.20647 21.3404   4
 -12   9   1 15.9534 8.86937   5
 -12   9   1 -20.634 25.1871   1
 -12  -9  -1 51.6024 24.7582   2
   9  12   1 26.4155 22.6680   2
  -9 -12   1 11.0102 24.2113   2
  -9  12  -1 8.45191 13.3138   5
 -12   9   1 2.18230 10.4640   2
  -9  12  -1 -33.735 27.6682   1
  -9 -12   1 49.8157 27.3453   3
   9 -12  -1 5.55281 22.6777   4
 -12  -9  -1 8.19736 22.9028   3
 -11  12   1 -7.2354 12.7325   5
 -11  12   1 -9.4006 13.3394   2
 -11 -12  -1 -5.1816 24.5844   2
  12 -11  -1 38.7217 23.8983   4
 -12  11  -1 6.30508 24.7980   1
 -11 -12  -1 -42.325 21.6875   3
  11 -12   1 -17.509 24.2476   4
 -12  11  -1 -9.2473 12.5418   5
 -12 -11   1 -18.708 18.3341   2
  11  12  -1 41.3378 26.4008   2
 -12  11  -1 21.6581 15.3924   2
 -11  12   1 -7.5642 27.1974   1
 -12 -11   1 -35.202 17.9641   3
 -11  12  -1 -21.586 31.3256   1
 -12  11   1 -12.211 12.1735   2
 -12  11   1 -7.3691 30.1984   1
 -12 -11  -1 2.68654 18.9763   3
 -11 -12   1 15.3403 26.4286   2
 -12 -11  -1 33.0154 26.9322   2
 -11  12  -1 0.99489 14.0345   5
 -11  12  -1 -5.8321 14.8380   2
  11  12   1 -49.973 21.5749   2
  11 -12  -1 -14.216 23.9162   4
 -12  11   1 8.56731 12.4879   5
 -11 -12   1 -35.810 24.6286   3
  12 -11   1 -46.046 18.6833   4
 -13   0  -1 -14.337 10.6215   3
   0 -13  -1 -4.1598 21.3002   3
 -13   0   1 -4.0723 12.2780   2
 -13   0  -1 2.85383 12.8832   2
   0 -13   1 22.1050 17.6533   3
   0  13  -1 0.34195 21.6756   1
 -13   0   1 8.91809 12.2078   3
  13   0  -1 3.58534 23.0013   4
   0  13  -1 14.3212 19.8929   5
  13   0   1 -40.762 15.7435   4
   0  13   1 -10.430 17.4989   5
   0 -13  -1 0.42517 12.1152   4
   0  13   1 21.6076 22.8062   2
   0 -13   1 -5.4584 21.5754   2
   0  13  -1 -29.219 16.3620   2
   0 -13  -1 -3.5297 20.3608   2
   0  13   1 33.5172 21.3586   1
   0 -13   1 3.28684 13.3364   4
 -13   2  -1 1.62389 14.7590   2
 -13  -2   1 30.5122 16.8294   3
  -2 -13  -1 31.7182 20.7980   3
  -2  13   1 -4.8806 17.2907   5
   2 -13   1 44.3233 21.2061   3
  -2  13   1 -22.406 19.1188   1
   2  13  -1 22.6708 18.2709   5
 -13  -2   1 0.99162 14.2041   2
   2  13  -1 -11.952 21.7863   1
  13  -2  -1 17.7944 24.1077   4
  -2  13   1 -3.4211 20.5133   2
  -2 -13  -1 -32.363 16.7777   2
   2  13  -1 45.9013 22.3784   2
 -13   2  -1 8.47278 7.79752   5
   2 -13   1 18.5247 17.1464   4
  13   2   1 12.0738 22.3682   4
   2 -13   1 -3.6912 16.4511   2
  -2  13  -1 34.3773 23.1022   1
   2 -13  -1 42.9208 20.8416   3
  -2  13  -1 23.9657 19.2018   5
 -13  -2  -1 36.5557 14.5896   3
 -13   2   1 22.8333 6.23227   5
  -2 -13   1 24.4964 23.5455   2
   2 -13  -1 25.7345 20.2719   2
  13  -2   1 1.13138 24.7553   4
   2  13   1 8.07505 21.5375   1
 -13  -2  -1 50.9969 18.9636   2
   2  13   1 17.3768 20.7737   5
  13   2  -1 -7.9514 17.5854   4
  -2 -13   1 0.57631 22.0401   3
  -2  13  -1 21.1838 18.4499   2
   2  13   1 -3.1629 23.6578   2
 -13   2   1 7.44493 12.6859   2
   2 -13  -1 8.73895 13.7373   4
 -13   4  -1 24.0246 5.56385   5
 -13   4  -1 20.4624 12.0360   2
   4 -13   1 27.3619 17.4139   4
  -4  13   1 20.8068 20.4397   2
  -4 -13  -1 -18.015 18.9550   2
 -13  -4   1 36.9197 17.4617   3
 -13  -4   1 33.0040 20.1508   2
  -4  13   1 43.0860 18.1183   5
  -4  13   1 40.5149 22.5368   1
   4  13  -1 7.00910 22.2099   2
   4  13  -1 27.8435 18.3399   5
  13  -4  -1 -6.0008 23.4783   4
  -4 -13  -1 4.62843 23.9203   3
 -13   4  -1 55.4869 24.1514   1
   4  13   1 33.1941 17.8675   5
  -4 -13   1 13.2627 20.0673   3
 -13  -4  -1 31.1704 18.0252   2
 -13   4   1 26.0352 24.6174   1
 -13  -4  -1 23.5352 16.9836   3
   4 -13  -1 37.4673 17.6192   4
 -13   4   1 44.3880 11.2042   2
  13  -4   1 20.1516 20.9010   4
  -4 -13   1 44.6236 21.9556   2
  -4  13  -1 14.9284 17.9660   5
  -4  13  -1 4.76246 20.7265   2
  -4  13  -1 23.9836 23.3794   1
   4  13   1 42.1073 23.1641   2
 -13  -6   1 -10.009 17.8111   3
 -13   6  -1 11.4488 9.61416   2
  -6  13   1 -2.9376 17.1606   2
 -13  -6   1 4.50859 19.9184   2
   6  13  -1 -12.372 18.4480   5
   6 -13   1 -2.4410 17.9737   4
  -6  13   1 -7.7119 22.6712   1
  -6 -13  -1 31.6099 20.9676   3
 -13   6  -1 34.7180 26.0177   1
   6  13  -1 2.26051 26.4479   2
  -6  13   1 0.28577 15.3882   5
  -6 -13  -1 -5.8681 19.9119   2
  13  -6  -1 -7.9296 19.9486   4
  -6  13  -1 -16.999 14.2417   5
 -13  -6  -1 28.6747 20.2075   2
 -13   6   1 -5.9616 23.4217   1
   6  13   1 13.0836 19.6038   5
  -6  13  -1 33.9635 26.3058   1
  -6 -13   1 5.17603 21.1244   3
 -13  -6  -1 2.00739 17.6599   3
   6  13   1 28.1385 26.0142   2
  -6 -13   1 -5.0694 24.4532   2
   6 -13  -1 -16.547 16.5234   4
  -6  13  -1 8.58994 19.2636   2
 -13   6   1 11.6789 7.92386   2
  13  -6   1 -17.795 22.5682   4
  13  -8  -1 19.0899 26.0715   4
  -8  13   1 9.15723 16.2677   2
 -13  -8   1 -9.8782 19.6306   3
  -8  13   1 7.28837 26.0328   1
 -13  -8   1 13.2645 22.6765   2
 -13   8  -1 14.6873 9.02035   5
   8 -13   1 24.1881 21.6749   4
 -13   8  -1 4.11955 10.4157   2
  -8 -13  -1 18.9988 21.6479   3
   8  13  -1 62.7493 29.7962   2
  -8  13   1 0.43076 14.3623   5
  -8 -13  -1 27.0657 22.6531   2
 -13   8  -1 3.81795 27.6194   1
   8  13  -1 28.5416 19.2883   5
 -13  -8  -1 32.6906 22.3802   2
 -13  -8  -1 2.80277 20.4949   3
  -8  13  -1 -9.8246 15.2640   2
  -8 -13   1 -26.790 24.7840   3
  -8  13  -1 -9.9993 14.9009   5
 -13   8   1 22.2145 9.42085   2
   8  13   1 15.3086 25.9132   2
  -8 -13   1 -34.538 24.2018   2
   8  13   1 6.10352 17.7571   5
 -13   8   1 -0.0348 24.6902   1
  -8  13  -1 8.59248 22.8997   1
   8 -13  -1 -8.6469 21.2836   4
  13  -8   1 10.6925 25.9259   4
 -10  13   1 46.5669 31.1555   1
  10  13  -1 39.1051 27.8263   2
 -13  10  -1 2.51395 11.1565   5
 -13  10  -1 7.97777 30.2590   1
 -10  13   1 -12.364 15.9024   2
 -13 -10   1 16.7703 23.9208   3
 -13 -10   1 -1.3156 24.0067   2
 -10 -13  -1 -36.416 22.8525   3
 -10  13   1 -0.6058 15.8157   5
 -10 -13  -1 4.95916 22.0627   2
  10 -13   1 -19.384 23.2896   4
 -13  10  -1 -2.1615 12.1855   2
  13 -10  -1 -13.345 21.2375   4
 -13 -10  -1 18.5988 24.5305   3
 -10  13  -1 21.9459 30.7260   1
 -10 -13   1 -7.9303 25.0662   3
  10  13   1 21.2061 26.7155   2
  13 -10   1 12.9002 22.2622   4
 -10  13  -1 14.1651 14.8362   5
 -10 -13   1 -6.3241 21.1596   2
 -13 -10  -1 -0.7093 23.0280   2
  10 -13  -1 33.5878 21.2033   4
 -13  10   1 69.6135 31.5443   1
 -13  10   1 -20.381 11.4543   5
 -10  13  -1 -26.283 16.4533   2
 -12  13   1 -22.795 14.1026   5
 -12  13   1 0.72039 15.5584   2
 -13  12  -1 22.8574 14.5916   2
  12 -13   1 17.0004 27.6479   4
 -13 -12   1 -24.435 24.0418   3
 -12 -13  -1 54.5682 30.6455   2
 -13  12  -1 -25.195 12.6488   5
 -12 -13  -1 55.3369 28.0711   3
  13 -12  -1 27.2872 28.8690   4
 -12  13   1 10.1122 32.4400   1
 -13  12  -1 11.6202 26.7900   1
 -13 -12   1 -26.183 24.3397   2
 -13  12   1 -7.4842 31.4128   1
 -13 -12  -1 38.5687 26.7145   3
 -13  12   1 -0.1094 13.7524   5
 -12  13  -1 13.2835 15.8900   5
 -13 -12  -1 -5.4698 25.2260   2
  13 -12   1 -28.827 25.3242   4
 -12  13  -1 -6.6657 14.4873   2
 -12  13  -1 -34.516 24.9872   1
  12 -13  -1 4.92893 25.5323   4
 -12 -13   1 18.0391 26.2772   3
 -12 -13   1 19.3871 27.2271   2
 -14   1  -1 7.18465 15.5259   2
   1  14  -1 37.0251 22.4312   5
 -14  -1   1 3.19950 14.6395   3
   1 -14   1 16.3233 21.9111   3
   1  14  -1 9.87361 24.9915   2
  -1  14   1 6.03494 16.8400   5
  -1 -14  -1 19.8382 23.6121   3
  -1  14   1 22.3570 22.9924   2
   1  14  -1 14.4191 23.5736   1
  14   1   1 20.1252 20.3688   4
 -14  -1   1 39.1478 16.5794   2
  -1  14   1 34.3301 21.8242   1
 -14   1  -1 27.8554 14.8349   5
   1 -14   1 21.0526 17.3588   2
  -1 -14  -1 18.8735 20.5634   2
   1 -14   1 53.8858 17.2952   4
  14  -1  -1 28.8164 25.0369   4
  -1 -14   1 25.8172 23.1166   3
  -1  14  -1 50.0324 23.6491   1
   1  14   1 23.2859 21.6916   1
   1 -14  -1 4.32103 20.7851   2
 -14   1   1 7.97649 13.5668   2
 -14  -1  -1 32.4479 15.4227   3
 -14  -1  -1 5.46615 15.3144   2
  14   1  -1 50.2274 25.2510   4
  -1  14  -1 30.5799 18.3296   5
  -1 -14   1 25.0817 24.0807   2
   1  14   1 20.9506 20.8318   5
   1 -14  -1 -9.1231 16.4546   3
 -14   1   1 8.15479 13.5546   5
   1  14   1 7.75358 19.6042   2
  -1  14  -1 21.7378 20.2892   2
  14  -1   1 13.6142 20.7368   4
   3  14  -1 -18.418 20.2725   2
  -3 -14  -1 -1.5759 18.7692   3
  -3  14   1 -21.248 19.8727   2
  -3  14   1 25.4149 16.5545   5
   3  14  -1 -15.873 20.7436   5
   3  14  -1 18.1934 24.3739   1
 -14   3  -1 17.0651 7.99960   5
 -14  -3   1 28.0769 16.2237   3
  14  -3  -1 -35.798 22.9261   4
 -14   3  -1 -2.3765 13.8619   2
   3 -14   1 -16.439 17.0213   4
  -3 -14  -1 -13.891 19.8701   2
  -3  14   1 34.4369 22.8206   1
 -14  -3   1 49.5064 17.3562   2
 -14  -3  -1 36.2205 17.8900   3
  -3  14  -1 2.93276 19.2627   5
  -3 -14   1 0.03554 22.3464   3
 -14  -3  -1 17.2397 16.3528   2
   3 -14  -1 13.4962 17.3884   4
  14  -3   1 6.42872 24.7970   4
 -14   3   1 13.1630 13.2191   2
  -3  14  -1 13.4980 23.3952   1
  -3 -14   1 3.92011 24.8007   2
  -3  14  -1 41.2789 23.4396   2
   3  14   1 -21.108 19.8335   5
   3  14   1 0.02700 21.6312   2
 -14   5  -1 12.9476 26.0559   1
  14  -5  -1 27.4530 21.9016   4
  -5  14   1 -0.8099 21.7565   1
  -5 -14  -1 -13.574 19.3178   2
 -14  -5   1 47.0181 19.6276   2
 -14  -5   1 25.5021 18.3558   3
   5  14  -1 17.6341 21.3592   2
  -5  14   1 2.32237 18.0666   5
 -14   5  -1 -1.8469 9.98407   2
  -5  14   1 27.9744 21.8625   2
   5  14  -1 14.1749 20.4864   5
  -5 -14  -1 22.9055 21.0107   3
   5 -14   1 -16.749 18.8086   4
  -5  14  -1 -3.9590 22.8121   1
 -14   5   1 -3.2557 9.64295   2
  -5  14  -1 -21.796 19.5960   2
 -14  -5  -1 -22.168 15.7692   3
  -5  14  -1 5.91556 17.3556   5
  -5 -14   1 34.5328 27.0801   2
   5  14   1 -29.130 19.9325   5
  -5 -14   1 19.3476 21.1904   3
 -14  -5  -1 4.02111 18.0430   2
 -14   5   1 -24.092 18.6217   1
   5 -14  -1 -6.5229 16.5683   4
  14  -5   1 -14.329 19.5059   4
   5  14   1 2.09180 21.9617   2
  -7 -14  -1 -19.153 23.8023   3
 -14   7  -1 12.1398 27.0792   1
 -14  -7   1 -2.9316 19.2796   2
  -7 -14  -1 -26.451 24.1197   2
  -7  14   1 1.88275 25.1277   1
   7 -14   1 0.13835 20.9646   4
 -14  -7   1 17.9830 20.0715   3
  -7  14   1 -24.371 16.7260   2
  -7  14   1 3.02261 16.8750   5
  14  -7  -1 -36.506 18.8332   4
   7  14  -1 -9.3932 15.4983   5
   7  14  -1 -10.592 28.2893   2
 -14  -7  -1 -7.5937 20.5983   2
  -7 -14   1 6.09711 22.3976   2
 -14  -7  -1 -37.233 17.1846   3
   7 -14  -1 5.45263 19.9478   4
   7  14   1 6.70378 29.2198   2
   7  14   1 6.07802 16.9804   5
  -7 -14   1 1.65286 21.2777   3
  14  -7   1 -4.1594 20.9430   4
  -7  14  -1 7.17191 16.8577   5
  -7  14  -1 -18.648 18.1041   2
  -7  14  -1 -1.7731 26.0337   1
 -14   7   1 21.3078 28.2151   1
  -9  14   1 38.6678 17.8480   5
   9 -14   1 21.8183 23.2849   4
  -9  14   1 42.9007 28.3091   1
 -14  -9   1 13.4428 22.1738   3
  -9 -14  -1 -2.9104 26.6257   3
 -14   9  -1 27.6007 25.5178   1
  14  -9  -1 49.1847 23.7168   4
 -14  -9   1 8.24277 24.5613   2
   9  14  -1 -19.619 22.6348   2
  -9 -14  -1 -8.1109 21.5411   2
  -9  14   1 -0.5404 18.7871   2
  -9  14  -1 28.3282 17.4151   5
  -9  14  -1 37.9872 18.7865   2
   9  14   1 22.6316 23.7128   2
 -14   9   1 29.1971 27.3634   1
 -14  -9  -1 16.2985 18.6761   3
  14  -9   1 0.64740 23.0706   4
  -9 -14   1 18.8689 27.6159   3
 -14  -9  -1 -37.767 20.9883   2
  -9 -14   1 30.9141 23.7088   2
   9 -14  -1 12.1833 18.4662   4
  -9  14  -1 10.9399 28.1852   1
 -11 -14  -1 12.2428 28.0255   2
 -14  11  -1 -8.3351 14.5707   5
 -14 -11   1 21.8428 20.4903   3
 -14 -11   1 66.8258 27.6861   2
  14 -11  -1 6.41857 22.1414   4
 -11 -14  -1 12.7298 25.6997   3
 -11  14   1 4.80500 17.4716   5
 -11  14   1 14.0771 17.1380   2
  11 -14   1 27.1682 26.4366   4
 -14  11  -1 -4.5817 32.0557   1
 -11  14  -1 -2.6206 18.7497   2
  11 -14  -1 25.3255 26.8523   4
 -11 -14   1 -10.265 25.3769   3
 -14 -11  -1 20.0525 27.0359   2
 -11  14  -1 10.3309 17.4153   5
 -11 -14   1 -39.298 26.6043   2
 -14 -11  -1 -5.0301 23.6007   3
 -11  14  -1 -24.842 29.7018   1
 -14  11   1 30.8755 32.9540   1
  11  14   1 1.31823 21.9860   2
  14 -11   1 32.3822 23.4327   4
   0  15  -1 -2.9300 17.4676   5
   0  15   1 39.8934 26.3605   2
   0 -15  -1 -3.5254 23.1780   3
   0 -15   1 -28.064 20.4916   3
   0 -15   1 1.30647 22.9649   2
   0  15   1 -1.4856 20.7275   5
  15   0  -1 -5.0776 19.0896   4
   0  15  -1 40.2236 25.9603   2
 -15   0  -1 7.99670 14.2281   2
  15   0   1 -0.1528 19.6508   4
   0  15   1 12.0351 21.6605   1
   0  15  -1 -14.715 22.3680   1
 -15   0   1 -16.452 13.3145   2
   0 -15  -1 3.95572 23.2271   2
   2  15  -1 24.2866 26.4264   2
  15  -2  -1 27.3844 22.0247   4
  -2  15   1 6.21084 20.9077   5
  -2  15   1 13.1914 21.0502   1
  -2  15   1 26.8595 24.4671   2
   2 -15   1 -25.771 19.8244   3
 -15   2  -1 18.3162 13.2196   5
  -2 -15  -1 -1.5071 23.3061   3
 -15  -2   1 7.06507 15.9920   2
   2  15  -1 41.5891 24.5777   1
 -15   2  -1 5.88826 16.3684   2
   2  15  -1 -7.2858 17.4471   5
  -2 -15  -1 -15.065 19.0706   2
  15   2   1 -7.1920 21.9638   4
   2  15   1 9.70771 18.0200   5
  -2 -15   1 -1.9223 24.0032   3
   2  15   1 24.9738 20.5258   1
 -15   2   1 -12.032 14.9189   2
  15  -2   1 9.67620 22.1045   4
 -15  -2  -1 -12.801 13.1988   2
   2  15   1 -8.0823 27.0126   2
  -2 -15   1 42.4477 25.9158   2
  -2  15  -1 -32.481 21.8240   2
  -2  15  -1 -19.899 21.6981   1
  -2  15  -1 5.40227 21.0141   5
 -15   2   1 5.43420 12.0985   5
   4  15  -1 10.8030 22.7010   2
  -4 -15  -1 -34.542 25.4985   2
  -4 -15  -1 6.48984 21.9737   3
  15  -4  -1 23.5355 21.3422   4
   4  15  -1 37.2811 23.2906   5
 -15  -4   1 -5.3392 16.3435   2
 -15  -4   1 39.4438 20.5806   3
  -4  15   1 6.05819 21.1440   2
  -4  15   1 -1.9778 15.6112   5
   4 -15   1 -31.487 15.4662   4
 -15   4  -1 -10.870 9.82264   2
  -4  15   1 -9.0212 20.6258   1
 -15   4  -1 15.6581 22.0616   1
   4  15   1 -10.215 21.2056   2
  -4 -15   1 2.36607 21.0545   3
 -15   4   1 -1.6682 24.6385   1
 -15  -4  -1 -11.837 16.8414   2
 -15  -4  -1 8.95292 15.9641   3
  -4  15  -1 -10.525 22.2735   1
  -4  15  -1 -36.151 20.2128   2
  -4  15  -1 4.75688 19.5072   5
   4  15   1 -17.760 16.6410   5
  -4 -15   1 9.81525 21.6432   2
  15  -4   1 34.0302 21.4570   4
   6  15  -1 -13.379 22.9142   2
 -15   6  -1 34.8691 29.4562   1
 -15  -6   1 27.8505 19.3022   3
   6  15  -1 -23.581 19.7462   5
   6 -15   1 -7.8997 17.0850   4
  -6  15   1 -9.1268 18.5325   5
  15  -6  -1 15.4214 23.6575   4
  -6 -15  -1 -16.505 21.4281   2
  -6  15   1 -9.8313 18.5404   2
 -15  -6   1 -16.705 18.9374   2
  -6  15   1 15.2072 24.2762   1
  -6 -15  -1 -26.096 19.2501   3
  -6 -15   1 -1.4894 21.9163   2
 -15  -6  -1 20.7694 20.5601   2
  -6  15  -1 -26.976 19.3275   2
   6  15   1 -18.927 21.0600   5
 -15   6   1 -35.906 25.1128   1
  15  -6   1 53.6552 24.1912   4
  -6  15  -1 -42.923 16.1803   5
 -15  -6  -1 -53.547 14.3610   3
   6 -15  -1 -18.984 17.3363   4
  -6  15  -1 -8.2368 23.7824   1
   6  15   1 -0.6976 21.9024   2
  -6 -15   1 -10.243 20.8054   3
 -15   8  -1 19.8048 30.2625   1
 -15  -8   1 -8.0533 19.7359   3
 -15  -8   1 -51.904 19.6123   2
   8  15  -1 2.22242 23.6041   2
  -8  15   1 9.95470 18.4686   2
  -8  15   1 18.2224 20.5645   5
   8 -15   1 -11.845 21.7601   4
  15  -8  -1 59.2006 30.6986   4
  -8 -15  -1 -13.701 27.0008   2
  -8 -15  -1 9.52521 24.4369   3
 -15  -8  -1 -24.464 18.7029   3
  -8  15  -1 -9.3835 17.5543   5
   8  15   1 -15.248 23.5500   2
  -8  15  -1 21.3320 28.2094   1
  15  -8   1 -26.037 25.0213   4
  -8 -15   1 8.78612 27.4044   2
 -15  -8  -1 6.81860 21.8458   2
  -8  15  -1 -20.451 18.1798   2
   8 -15  -1 -20.067 19.8011   4
  -8 -15   1 -23.450 24.3469   3
 -15   8   1 -33.262 24.6517   1
  -1  16   1 22.4778 21.9312   2
   1  16  -1 14.4451 23.0554   5
  -1 -16  -1 27.2388 21.4442   3
  16  -1  -1 19.8757 24.2783   4
 -16   1  -1 26.8298 16.8201   2
   1  16  -1 6.89418 23.3842   1
  16   1   1 0.49441 25.1633   4
   1  16  -1 8.52586 28.3820   2
   1 -16   1 29.5360 23.6335   3
 -16  -1   1 4.58108 14.6555   2
  -1  16   1 -23.153 20.6213   1
  -1 -16  -1 -16.614 18.2386   2
  -1  16   1 24.8547 22.7482   5
 -16  -1  -1 1.57209 15.2659   2
  -1  16  -1 -23.082 25.1382   2
  -1  16  -1 -19.778 22.2549   1
  -1 -16   1 -23.386 17.6846   3
   1  16   1 -9.1523 22.1363   5
  16  -1   1 34.3335 27.8180   4
 -16   1   1 7.35172 14.8894   2
   1  16   1 -73.698 19.6377   1
  -1 -16   1 13.5276 25.8265   2
  -1  16  -1 -15.362 17.0682   5
   1  16   1 22.2660 26.5393   2
  16   1  -1 -6.1881 19.6411   4
   1 -16  -1 -41.603 21.2957   3
 -16  -3   1 9.29097 15.6508   2
  -3 -16  -1 1.80977 24.6067   3
  16  -3  -1 51.5551 23.4078   4
 -16   3  -1 -14.586 22.2849   1
  -3 -16  -1 22.1365 22.4136   2
  -3  16   1 40.8299 24.7243   1
  -3  16   1 72.2331 25.3998   2
 -16   3  -1 20.7506 15.6228   5
   3  16  -1 -7.0978 27.1138   2
   3  16  -1 24.5689 24.3147   5
  -3  16   1 12.8817 20.6972   5
 -16   3  -1 14.6691 22.2044   2
  -3 -16   1 15.8650 25.8916   3
  -3  16  -1 -17.171 22.1308   2
  -3 -16   1 -23.106 25.5421   2
 -16  -3  -1 5.96166 19.0193   2
  -3  16  -1 -8.9381 22.2426   1
  -3  16  -1 17.1125 21.5649   5
  16  -3   1 -4.1518 25.7543   4
   3  16   1 55.2680 30.0691   2
   3  16   1 25.1868 24.0041   5
  -5 -16  -1 11.5956 22.6042   3
  -5  16   1 14.0679 18.7302   2
 -16   5  -1 0.22870 22.6128   1
   5  16  -1 -31.221 21.9318   2
   5  16  -1 -10.227 16.6982   5
 -16  -5   1 11.6023 17.6668   2
 -16  -5   1 18.8988 17.7643   3
  16  -5  -1 -15.219 26.3864   4
  -5 -16  -1 -8.1925 27.9683   2
  -5  16   1 -39.714 18.8640   5
  -5 -16   1 -28.611 27.7631   2
  -5 -16   1 33.1559 24.6136   3
 -16   5   1 -6.2601 23.1271   1
  -5  16  -1 11.1713 21.4238   5
   5  16   1 -27.296 21.4424   5
 -16  -5  -1 -6.2143 17.6759   2
   5  16   1 10.6722 25.2122   2
 -16  -5  -1 7.04951 20.4020   3
  16  -5   1 13.6267 22.8714   4
  -5  16  -1 4.93483 21.0709   2
  -5  16  -1 -42.421 21.9444   1
 -16   7  -1 -37.388 27.5162   1
  -7 -16  -1 43.6381 25.0260   3
  -7  16   1 -16.746 19.0138   2
   7  16  -1 -27.295 19.7295   5
  16  -7  -1 -13.931 21.8548   4
  -7 -16  -1 66.7705 31.9650   2
   7  16  -1 17.3685 25.3297   2
  -7  16   1 5.33435 18.8949   5
 -16  -7   1 10.3198 19.5698   3
 -16  -7   1 -5.8225 20.4049   2
   7  16   1 -7.8054 20.2390   5
 -16  -7  -1 22.6388 20.8469   3
  -7 -16   1 -31.117 26.5093   2
  -7 -16   1 -1.4760 20.9030   3
 -16   7   1 3.15607 28.8142   1
  16  -7   1 42.6394 23.9312   4
  -7  16  -1 16.4292 20.7879   2
  -7  16  -1 -39.925 16.7869   5
 -16  -7  -1 -14.499 19.8879   2
   7  16   1 -14.050 29.7282   2
   0  17   1 -35.699 21.6225   1
   0  17  -1 -0.4140 25.1413   2
   0  17  -1 -3.4280 19.3309   5
  17   0  -1 19.4447 27.3607   4
 -17   0  -1 2.41214 16.6519   2
   0  17   1 -21.246 21.6459   5
   0  17  -1 -1.8812 23.4141   1
   0 -17  -1 9.28548 24.3418   3
   0  17   1 -18.846 25.6863   2
   0 -17   1 -20.261 17.0407   3
 -17   0   1 6.43413 13.5693   2
  17   0   1 -34.895 24.6375   4
  -2 -17  -1 -14.619 19.5512   2
  -2 -17  -1 -0.9438 20.0976   3
   2  17  -1 -22.447 27.2558   2
  -2  17   1 37.9240 25.3775   2
 -17  -2   1 15.7860 17.3952   2
  -2  17   1 3.77790 22.3259   5
   2  17  -1 8.07757 23.7191   5
  17  -2  -1 -17.142 24.9418   4
   2  17  -1 -27.406 24.3558   1
   2  17   1 -8.7310 27.2493   2
  -2  17  -1 9.35316 22.4784   5
  17  -2   1 39.1337 26.6000   4
   2  17   1 -5.0704 22.7295   5
  -2 -17   1 -26.996 25.7574   2
  -2  17  -1 6.53187 24.8689   2
  -2  17  -1 -70.792 20.3553   1
  -2 -17   1 -14.259 20.5246   3
 -17  -2  -1 -6.6368 16.2296   2
 -17  -4   1 -1.1653 16.4529   2
  -4  17   1 19.6714 23.4693   2
  -4  17   1 33.4496 23.2030   5
 -17   4  -1 22.0543 31.5761   1
   4  17  -1 16.2821 29.6942   2
  -4 -17  -1 -21.890 20.2264   3
   4  17  -1 34.6707 26.1004   5
  17  -4  -1 22.6040 26.9285   4
  -4 -17  -1 -4.7203 23.0747   2
  17  -4   1 -25.210 19.0410   4
 -17   4   1 -21.107 23.1028   1
  -4 -17   1 -9.5145 20.3241   3
  -4  17  -1 -34.941 16.1795   2
   4  17   1 22.9702 20.3077   5
   4  17   1 34.7949 26.1019   2
  -4  17  -1 8.84308 22.6409   5
 -17  -4  -1 22.4259 18.0461   2
  -4 -17   1 24.0558 23.6463   2
   1  -1   2 2.45968 2.19652   5
   1  -1  -2 -5.8172 3.09301   4
   1   1   2 -3.4400 3.94688   3
  -1  -1   2 -1.1582 3.47106   2
   1   1  -2 -3.3948 3.13623   3
  -1  -1  -2 -3.6547 1.71131   4
   1  -1   2 0.94419 3.45164   2
   1  -1   2 0.06589 1.81840   3
   1  -1  -2 -1.4406 2.07908   2
  -1  -1  -2 -5.6095 5.05839   2
   1   1  -2 -3.4482 4.71989   1
  -1  -1   2 0.01583 2.80112   5
  -1  -1   2 -4.1816 3.43892   2
  -1   1  -2 -2.2726 1.54563   3
  -1  -1   2 -3.2492 4.66319   3
   1   1   2 -2.7445 2.50926   4
   1  -1   2 2.36796 4.05421   4
   1   1  -2 -1.5006 3.00318   2
   1   1   2 -0.6647 3.31916   2
   1   1  -2 -1.7271 2.79115   5
  -1   1  -2 -5.4295 2.87522   2
  -1   1   2 1.14773 3.08123   4
   1  -1   2 -3.1412 3.72886   2
  -1   1   2 -4.2269 1.65299   2
  -1   1  -2 -4.6449 1.65307   5
  -1   1  -2 -3.1511 3.97128   2
  -1   1  -2 -0.8045 4.80124   1
  -1   1   2 -1.5194 1.99300   2
  -1  -1  -2 -4.0664 3.85866   2
  -1  -1  -2 2.43991 4.17417   3
   0  -2   2 180.484 13.4334   2
   0   2  -2 174.711 13.7397   2
  -2   0   2 111.387 7.95675   2
   2   0   2 178.957 13.1608   2
   0   2   2 75.4419 10.4130   1
   0  -2  -2 189.416 15.1712   2
   0  -2  -2 160.058 12.7128   3
   0  -2   2 174.716 12.2625   3
   2   0  -2 180.501 13.4247   4
  -2   0   2 143.676 11.0588   3
   0   2  -2 169.983 14.9897   1
  -2   2   2 -3.8328 4.89983   2
  -2  -2   2 4.33103 8.73699   2
  -2  -2  -2 0.60265 8.99922   3
   2  -2  -2 -0.9627 5.38054   2
  -2  -2   2 5.31389 7.71208   5
   2   2  -2 -12.520 6.90229   5
  -2   2  -2 0.55898 3.46139   5
  -2  -2   2 -22.109 10.4948   3
  -2   2  -2 -7.0320 10.4765   1
  -2  -2  -2 -7.8345 11.9890   2
   2   2   2 -6.0958 8.75560   3
  -2   2  -2 -12.135 7.22480   2
   2  -2   2 -10.555 7.11296   2
  -2   2   2 1.26427 8.36518   1
   2   2  -2 -2.0856 8.91007   3
  -2   2  -2 -16.348 7.63134   4
  -2   2  -2 2.97133 7.07468   2
   2   2   2 -8.0448 6.21603   4
  -2   2   2 -3.6905 8.47544   4
   2  -2   2 10.6865 9.35828   4
   2   2  -2 -2.0667 9.74542   2
   2  -2  -2 -1.3153 8.24399   4
  -2   2   2 3.42996 5.87755   2
   2  -2  -2 -6.5566 3.02784   2
  -2   2  -2 -1.4290 4.62711   3
   2   2   2 0.96536 9.94246   2
  -2  -2   2 -13.708 10.7242   2
  -2  -2  -2 -1.4958 8.81060   2
  -2  -2  -2 -3.6136 5.31473   4
   2   2   2 5.82275 8.69876   5
  -3  -1   2 2533.20 95.1347   2
   1  -3   2 2364.05 96.2013   2
  -3  -1   2 2511.21 97.0722   4
   1   3  -2 2442.59 98.1520   2
  -1  -3  -2 2512.67 98.4475   2
  -3   1  -2 2111.93 95.3498   2
   1   3  -2 2555.36 98.7971   3
  -3   1  -2 2452.53 94.5445   2
  -3   1  -2 2421.93 90.7088   3
  -1  -3  -2 2363.42 97.0881   3
  -1   3   2 2396.68 96.0372   1
   3   1   2 2500.22 94.9140   3
  -3  -1   2 2429.42 91.5340   5
  -3  -1   2 2554.95 95.0458   2
  -1   3   2 2353.08 94.4573   4
  -1   3   2 2383.40 95.7264   2
  -3   1  -2 2439.90 97.4802   4
   3   1   2 2263.01 92.9582   5
   1  -3   2 2335.26 94.8855   3
  -1   3   2 2506.00 96.2150   3
  -1   3   2 2474.01 95.9414   2
   3   1   2 2374.95 95.8962   2
   1   3  -2 2357.12 97.8387   1
  -3  -1   2 2382.32 95.9638   3
   1   3  -2 2439.50 96.1196   5
   3  -1  -2 2389.60 97.4831   4
   3   1   2 2422.32 95.8776   4
   1   3   2 2393.26 95.7179   1
   1  -3  -2 2395.01 95.8187   2
   1   3   2 2491.58 96.0713   5
  -1   3  -2 2237.18 93.8482   5
  -3  -1  -2 2591.65 93.5650   5
  -1  -3   2 2465.96 97.1037   3
   3   1  -2 2415.22 97.0123   4
  -1   3  -2 2285.80 96.0164   2
  -3   1   2 2387.56 90.5883   2
   1  -3  -2 2301.34 94.2551   4
  -3  -1  -2 2402.62 94.5853   3
  -3   1   2 2345.42 89.8727   2
   1   3   2 2363.27 97.6579   2
   3   1  -2 2401.38 94.4171   2
   3   1  -2 2559.63 96.5686   3
  -1   3  -2 2526.79 95.0122   3
   1   3   2 2529.28 101.958   3
  -3   1   2 2536.78 97.8390   4
  -3  -1  -2 2529.42 96.1951   2
   3  -1   2 2313.42 97.2570   4
  -3  -1  -2 2554.14 96.0355   4
  -1  -3   2 2432.86 97.8156   2
  -1  -3   2 2659.68 97.1045   5
  -1   3  -2 2342.53 100.562   1
   1  -3  -2 2320.79 95.9131   3
  -3  -1  -2 2399.08 95.5658   2
   3  -3  -2 1986.17 85.8689   4
   3   3  -2 1987.04 82.6197   5
  -3   3   2 2044.63 80.5887   2
  -3  -3  -2 2043.96 85.9472   3
  -3  -3   2 1918.39 85.8223   3
  -3  -3   2 2150.14 84.5276   5
   3   3  -2 2060.64 86.6461   2
  -3  -3  -2 2148.08 88.8197   2
  -3   3  -2 1976.77 88.7958   1
   3   3   2 2085.33 88.2530   2
   3   3   2 2059.32 84.0360   5
  -3   3  -2 2112.61 79.9722   3
  -3   3   2 2211.32 87.5855   4
  -3   3  -2 2164.58 87.7275   4
  -3   3   2 2047.90 85.7618   1
   3  -3   2 2063.62 86.8252   4
  -3   3  -2 2103.52 83.0767   2
  -3   3   2 2014.44 80.4334   2
  -3  -3   2 2013.61 86.7229   2
  -3  -3  -2 2065.97 81.1759   4
  -3   3  -2 2052.56 82.6495   2
   4   0   2 645.560 36.7626   4
  -4   0   2 649.798 29.2072   2
  -4   0   2 664.102 29.1822   2
  -4   0  -2 635.207 32.2111   2
   0   4   2 715.545 38.5397   2
   0  -4   2 578.867 33.6189   3
  -4   0  -2 624.826 25.8626   5
   4   0  -2 617.202 32.1707   3
   0  -4  -2 692.123 38.5715   2
   0   4  -2 583.145 37.0002   1
   4   0  -2 635.142 37.4815   4
   0  -4  -2 660.436 36.9184   3
  -4   0  -2 626.363 25.6802   5
   4   0   2 605.830 32.7214   2
   0   4   2 632.933 33.1776   1
  -4   0  -2 644.868 28.9063   3
   4   0   2 645.982 29.5742   3
  -4   0  -2 641.562 31.8094   2
   0   4  -2 618.151 33.9940   5
   0   4  -2 645.135 38.5213   2
  -4   0  -2 686.580 37.4780   4
  -4   0   2 647.591 35.7514   4
  -4   0   2 669.511 31.8197   3
   0  -4  -2 643.595 29.9575   4
   0  -4   2 613.077 37.4010   2
  -2  -4  -2 -5.2814 13.6009   2
   2  -4   2 -12.441 11.2295   2
   4   2   2 8.76772 11.4089   4
  -4  -2   2 0.40212 12.0635   2
   2  -4   2 8.37514 10.9038   4
  -4  -2   2 9.16427 13.1501   3
  -2  -4  -2 -17.407 15.4002   3
   4   2   2 4.53376 7.13305   5
   2  -4   2 3.56498 9.61838   3
  -4  -2   2 2.00205 12.3470   2
   4   2   2 3.07734 13.7235   2
  -4  -2   2 2.83464 9.81970   4
  -4   2  -2 -6.5355 12.0544   2
  -4  -2   2 10.0443 7.73734   5
  -2   4   2 0.72443 10.7984   2
   2   4  -2 3.46375 16.8548   1
  -4   2  -2 -1.0104 9.98293   2
  -4   2  -2 2.29642 13.4334   1
  -2   4   2 -9.5227 12.8564   1
   2   4  -2 2.18826 14.0433   2
   2   4  -2 0.03119 10.0079   5
   4  -2  -2 -10.698 12.1842   4
  -2   4   2 -28.313 9.76475   2
  -2   4   2 3.25918 12.1464   4
  -4   2  -2 -11.427 12.5901   4
  -2   4  -2 -4.0268 11.1883   3
   2   4   2 3.78031 13.8906   2
  -2   4  -2 6.04714 8.02183   5
   4   2  -2 5.74958 12.8190   2
  -2  -4   2 41.2268 17.0558   2
  -2   4  -2 5.84694 11.8361   2
  -4  -2  -2 -1.9815 8.70081   5
  -2  -4   2 3.85439 12.4182   3
   4   2  -2 -1.0667 1.90551   5
  -4   2   2 -1.2083 5.90529   2
  -4  -2  -2 1.44390 10.6790   4
  -4  -2  -2 10.9975 12.2593   3
  -4   2   2 0.74817 13.1015   4
   4  -2   2 2.18957 3.94902   2
   2  -4  -2 -16.796 11.2531   4
   2  -4  -2 -7.0341 10.9603   2
  -4   2   2 5.76576 5.05758   2
   2   4   2 9.48955 10.7422   5
  -2   4  -2 9.38519 15.9998   1
   4  -2   2 18.7295 12.9440   4
  -2   4  -2 5.79541 12.3715   2
  -4  -2  -2 -5.9658 10.8468   2
  -4   4   2 7.16456 8.77840   2
   4   4   2 6.94034 11.7383   5
   4  -4  -2 0.72420 6.96460   2
  -4  -4   2 -10.542 16.2637   2
  -4   4  -2 24.6415 14.9505   1
   4   4  -2 14.2689 11.1121   5
  -4   4  -2 17.3800 8.14122   3
   4   4   2 -22.477 13.1862   2
  -4  -4  -2 -10.520 16.4243   2
  -4  -4  -2 -7.3428 9.18699   4
   4  -4   2 16.8751 13.8715   4
  -4  -4  -2 -0.2298 12.3077   3
  -4   4  -2 10.0956 11.5397   2
  -4   4  -2 -9.1180 10.6636   2
   4  -4  -2 16.3600 13.3410   4
  -4  -4   2 -3.5498 12.5261   3
  -4   4   2 8.03947 13.4197   1
   4  -4   2 -11.605 8.02516   2
   4   4  -2 -3.7334 13.1256   2
   1   5  -2 2037.93 90.2227   2
  -5  -1   2 2070.34 79.4036   5
  -5  -1   2 2180.25 84.6127   2
   5   1   2 2047.96 85.4922   2
  -1   5   2 2083.34 87.1331   1
  -1  -5  -2 2106.95 91.8128   2
  -5  -1   2 2024.71 84.8470   2
   1  -5   2 2006.05 88.6660   2
  -5  -1   2 2194.70 86.4222   3
  -1   5   2 2145.69 89.1793   2
  -1  -5  -2 2011.05 88.7784   3
   5   1   2 1923.28 87.0082   4
   1  -5   2 1993.19 86.7642   3
  -5  -1   2 2257.60 90.3749   4
  -5   1  -2 2193.19 84.3246   2
   1   5  -2 1985.09 89.3216   1
  -5   1  -2 2118.08 83.6588   2
  -5   1  -2 2245.19 96.3609   4
   1  -5   2 2007.97 85.9400   4
   1   5  -2 1994.73 86.7467   5
   5  -1  -2 1973.59 89.2036   4
  -5   1  -2 2151.34 80.9646   3
  -1  -5   2 1891.23 87.8123   3
   5   1  -2 2056.57 88.6559   4
   1  -5  -2 2134.60 84.8553   4
   1   5   2 2062.89 90.1280   2
   1   5   2 2149.10 87.8297   5
  -1   5  -2 2035.08 85.7348   5
   1  -5  -2 2037.18 87.8588   2
  -5   1   2 2055.45 83.2562   3
  -1   5  -2 2148.22 92.6178   1
  -5  -1  -2 2248.40 89.2937   4
   5  -1   2 2090.22 90.4479   4
  -5  -1  -2 1973.26 85.7435   2
  -5  -1  -2 2004.84 84.2317   3
  -5  -1  -2 2190.06 86.0128   2
  -1   5  -2 2031.73 88.3892   2
  -1  -5   2 2064.42 91.4563   2
   1   5   2 2031.40 88.0075   1
  -5   1   2 2077.68 80.2554   2
   5   1  -2 2015.48 83.7293   2
  -5   1   2 2117.99 80.3258   2
   1  -5  -2 2107.68 88.2857   3
  -5  -1  -2 2209.83 82.0384   5
   5   3   2 2974.72 114.588   5
  -3   5   2 2768.02 120.796   1
   3  -5   2 2981.37 115.951   3
  -5  -3   2 3021.67 116.568   5
  -5  -3   2 3008.94 120.988   2
   3  -5   2 2869.56 119.902   4
  -5  -3   2 2908.35 119.572   3
   3  -5   2 2890.82 117.276   2
   5  -3  -2 2882.04 122.294   4
  -3   5   2 3069.37 120.496   4
  -3   5   2 2870.90 116.721   2
   3   5  -2 2900.44 123.675   1
   3   5  -2 3048.72 119.233   5
   5   3   2 2879.05 117.313   4
  -5  -3   2 3010.32 119.094   4
  -5   3  -2 3106.09 115.329   2
  -5   3  -2 3027.44 115.839   2
   3   5  -2 2814.63 122.142   2
  -3  -5  -2 2829.39 121.103   3
  -3  -5  -2 2916.64 123.163   2
   5   3   2 2934.20 120.533   2
  -5   3  -2 2855.97 122.784   1
  -3   5   2 2971.26 117.002   2
  -3  -5   2 2931.37 121.284   3
   5  -3   2 2862.00 122.442   4
  -5  -3  -2 2855.11 121.112   2
   3  -5  -2 2967.08 116.779   2
  -3  -5   2 2906.76 122.681   2
  -3   5  -2 2855.15 118.222   2
  -5   3   2 2841.63 111.120   2
   3   5   2 2825.57 118.920   5
  -3   5  -2 3000.07 126.049   1
   5   3  -2 3013.87 113.062   5
  -3   5  -2 2726.48 113.712   5
   5   3  -2 2906.50 119.632   2
  -3   5  -2 3032.66 118.557   2
  -5  -3  -2 3006.41 117.653   4
  -5   3   2 2865.67 111.130   2
   3  -5  -2 2820.17 119.146   4
   3   5   2 2924.29 123.456   2
  -5  -3  -2 3026.55 119.751   3
  -5  -5  -2 3319.31 138.433   2
  -5   5  -2 3281.05 138.903   1
  -5  -5   2 3185.37 137.309   2
  -5   5   2 3314.46 128.910   2
  -5   5  -2 3353.45 127.738   3
  -5   5   2 3153.00 128.415   2
   5  -5  -2 3405.52 126.933   2
  -5  -5   2 3271.80 136.548   3
   5   5  -2 3318.12 131.659   5
  -5  -5   2 3407.36 132.258   4
   5  -5   2 3171.64 136.825   4
   5   5  -2 3521.32 138.382   2
  -5   5   2 3398.23 137.823   1
  -5   5  -2 3280.99 130.899   2
   5   5   2 3141.01 136.884   2
  -5   5  -2 3298.13 130.853   2
   5   5   2 3301.30 132.126   5
   5  -5  -2 3255.11 136.551   4
  -5  -5  -2 3288.09 129.649   4
  -5  -5  -2 3199.23 136.702   3
   0  -6  -2 72.5498 16.6901   3
   6   0  -2 62.5459 16.7743   4
  -6   0  -2 102.973 9.08329   5
   0   6   2 82.8353 20.5616   2
   0   6   2 75.7286 15.9036   5
  -6   0   2 80.8605 11.5991   2
   0  -6   2 101.666 17.5004   3
   0   6  -2 95.2464 17.1712   5
   0  -6   2 67.8200 19.8339   2
  -6   0  -2 110.946 14.8826   2
  -6   0   2 84.3232 13.7541   3
   6   0  -2 57.8617 9.82351   2
   0   6  -2 102.446 21.1578   1
  -6   0  -2 90.8537 13.8308   2
  -6   0  -2 85.0447 7.85797   5
   6   0   2 63.1203 19.1352   4
   6   0   2 108.077 14.5053   2
   0  -6  -2 116.484 14.8176   4
   0  -6  -2 119.884 21.7484   2
   0   6  -2 66.9819 17.9720   2
  -6   0   2 74.9527 11.8843   2
  -6   0  -2 82.5308 11.6483   3
   0   6   2 109.509 17.8860   1
   6   0   2 98.9784 13.7122   3
  -6   2  -2 269.632 23.4021   2
  -6  -2   2 290.065 25.8875   3
   2  -6   2 227.674 26.2171   2
  -6  -2   2 251.188 24.9814   2
   2   6  -2 247.300 28.6021   1
   2  -6   2 244.947 22.8490   4
   2   6  -2 325.333 27.9542   5
  -2   6   2 271.547 27.0784   2
  -6   2  -2 296.573 16.3556   3
  -2  -6  -2 240.818 29.6378   2
   6   2   2 229.985 25.1460   2
   2   6  -2 279.199 29.9990   2
  -6   2  -2 281.090 23.1170   2
   2  -6   2 271.267 24.5064   3
   6  -2  -2 219.509 26.9674   4
  -6  -2   2 261.192 22.5654   2
  -2  -6  -2 255.520 27.2957   3
  -6  -2   2 263.984 18.6432   5
  -2   6   2 299.089 29.1894   1
   6   2   2 285.900 27.2621   4
   6   2  -2 263.186 25.1392   2
   6  -2   2 254.776 17.2298   2
  -6   2   2 253.479 16.8976   2
  -2   6  -2 247.017 22.4854   5
   6   2  -2 267.593 25.5198   4
  -2   6  -2 239.340 30.3860   1
  -6   2   2 287.826 19.6015   3
  -6  -2  -2 239.284 23.4945   3
  -2  -6   2 283.293 27.2100   3
  -6  -2  -2 231.534 25.7946   2
  -2  -6   2 253.790 29.1111   2
   2   6   2 262.926 29.8905   1
   2  -6  -2 258.145 23.4940   4
   2  -6  -2 281.558 26.4220   3
   2   6   2 268.363 26.9579   5
   2  -6  -2 254.646 26.3041   2
  -2   6  -2 264.943 25.3555   2
  -6  -2  -2 265.932 29.1583   4
  -6  -2  -2 250.090 20.5333   5
  -6   2   2 260.050 16.1307   2
   6  -2   2 261.374 27.7365   4
   2   6   2 257.672 28.7062   2
   6   4   2 35.9115 10.3535   5
  -6   4  -2 32.1625 11.1540   2
   6  -4  -2 19.8838 18.3477   4
  -6   4  -2 34.2090 7.29957   3
  -4  -6  -2 22.3912 15.6512   3
   4   6  -2 19.8791 12.5177   5
  -6   4  -2 33.7733 16.3330   1
  -4  -6  -2 26.9229 8.93664   4
   4   6  -2 10.2166 16.0490   2
  -4   6   2 30.2298 15.0287   1
  -6   4  -2 39.7910 11.8942   2
  -6  -4   2 37.3949 16.9745   3
  -4   6   2 20.4930 12.2587   2
  -4  -6  -2 40.9886 17.9414   2
   6   4   2 13.8422 16.9575   2
   4  -6   2 47.0072 14.2543   2
   4  -6   2 35.7737 17.5084   4
  -6  -4   2 50.9821 17.7608   2
  -4   6  -2 31.9661 14.1136   2
   4   6   2 24.8603 16.9987   2
   4  -6  -2 14.9446 12.1111   2
  -6   4   2 21.0808 15.5809   1
  -6   4   2 31.8487 7.95931   2
   4  -6  -2 40.2921 17.0622   4
  -6  -4  -2 34.8219 12.7135   4
   6   4  -2 21.9270 9.30425   5
  -4   6  -2 39.7604 10.4424   5
   6  -4   2 47.5433 8.85041   2
  -6   4   2 36.6253 8.89447   2
  -6  -4  -2 25.3061 16.6282   3
  -4  -6   2 21.6599 15.5618   3
  -4   6  -2 -1.3573 19.9521   1
  -4  -6   2 58.4092 20.2872   2
  -4   6  -2 36.4868 13.4737   2
   6  -4   2 21.0135 18.7767   4
   6   4  -2 51.3581 15.2755   2
  -6  -4  -2 24.8701 17.5973   2
   4   6   2 42.1546 13.7914   5
  -6   6  -2 -0.2386 11.9487   2
  -6  -6   2 3.69525 14.4619   2
  -6  -6  -2 -12.345 13.6534   3
  -6   6   2 6.00596 15.9730   1
   6  -6  -2 -13.900 13.8234   4
   6  -6   2 -2.3566 3.04998   2
  -6  -6  -2 -17.316 10.3201   4
   6   6   2 -0.8829 11.7678   5
   6   6  -2 17.8249 19.3051   2
  -6   6  -2 11.7343 15.7233   1
   6   6   2 16.8115 15.7628   2
  -6   6   2 2.34717 9.92500   2
   6  -6   2 2.43465 14.8963   4
   6  -6  -2 1.22676 7.10998   2
  -6  -6  -2 10.9685 18.6293   2
  -6  -6   2 3.87271 14.5497   3
  -6   6   2 18.4321 10.2022   2
  -6   6  -2 9.53170 6.54326   5
   6   6  -2 3.20192 11.0239   5
  -6   6  -2 11.4526 12.3140   2
   1   7  -2 1235.68 59.7162   5
   1   7  -2 1168.93 62.0948   1
  -1   7   2 1117.54 57.4537   5
  -7  -1   2 1238.70 56.1123   2
   1   7  -2 1220.24 63.4920   2
  -7  -1   2 1329.46 56.8684   2
   7  -1  -2 1211.47 64.1802   4
  -1  -7  -2 1299.83 64.3359   2
   1  -7   2 1251.56 63.0621   2
  -1   7   2 1181.09 59.5362   1
   1  -7   2 1155.01 57.5582   4
  -7   1  -2 1226.44 55.2069   2
  -7  -1   2 1263.04 50.1276   5
   1  -7   2 1126.63 58.7444   3
  -1   7   2 1228.91 61.7023   2
   7   1   2 1272.04 62.6248   4
   7   1   2 1274.79 56.9961   2
  -7  -1   2 1230.86 57.4415   3
  -1  -7  -2 1282.10 63.7334   3
  -7   1  -2 1308.45 55.3809   2
   7  -1  -2 1258.69 49.0094   2
  -7   1  -2 1253.60 52.5161   3
   7   1  -2 1157.69 62.5191   4
  -1   7  -2 1274.74 63.9488   1
   7  -1   2 1231.21 63.9588   4
  -7   1   2 1282.30 54.7369   3
  -7  -1  -2 1278.16 52.4914   5
  -1  -7   2 1206.25 63.3474   3
  -7  -1  -2 1348.03 58.5294   2
   1   7   2 1221.42 65.0757   2
  -1  -7   2 1286.92 65.7136   2
   1  -7  -2 1272.25 56.1171   4
  -7  -1  -2 1296.57 58.4847   2
   1   7   2 1228.63 60.3014   1
  -1   7  -2 1166.48 58.4497   5
   1  -7  -2 1343.94 63.8878   2
  -7  -1  -2 1266.49 55.9612   3
  -7   1   2 1233.12 52.3713   2
   1  -7  -2 1183.60 61.1464   3
   1   7   2 1203.25 59.2855   5
   7   1  -2 1236.98 54.3049   2
  -1   7  -2 1210.25 63.4366   2
  -7   1   2 1224.61 52.0206   2
   7  -3  -2 2258.62 102.794   4
   3   7  -2 2361.18 104.222   2
  -7  -3   2 2295.92 99.6691   2
  -7   3  -2 2352.55 95.8420   2
  -7   3  -2 2379.41 89.9086   3
  -3   7   2 2245.65 102.156   1
   3   7  -2 2190.76 98.5981   5
  -3   7   2 2334.53 99.1665   2
  -7  -3   2 2365.79 94.7296   5
   7   3   2 2308.58 99.2320   2
   3  -7   2 2249.44 98.6312   2
  -7   3  -2 2261.49 103.105   1
   3  -7   2 2320.07 97.0655   3
   3   7  -2 2201.60 102.155   1
  -3  -7  -2 2148.88 101.791   3
   3  -7   2 2263.09 99.6358   4
  -7  -3   2 2233.25 98.9407   3
   7   3   2 2259.47 99.1261   4
  -3  -7  -2 2384.86 106.248   2
   7   3   2 2368.34 88.3131   5
  -7   3  -2 2323.68 96.6277   2
  -7  -3  -2 2317.01 100.488   2
  -7   3   2 2431.57 90.5752   2
   7  -3   2 2464.25 89.7101   2
  -3  -7   2 2300.86 104.915   2
   3   7   2 2189.00 98.6559   5
   3  -7  -2 2396.99 98.5693   2
  -3   7  -2 2196.14 95.2025   5
   7   3  -2 2260.82 97.7410   2
  -7  -3  -2 2294.44 98.3560   3
  -7   3   2 2514.40 91.6959   2
  -3   7  -2 2343.26 100.195   2
  -3  -7   2 2267.32 102.109   3
   3   7   2 2123.23 102.506   2
  -7   3   2 2361.40 93.5439   3
  -3   7  -2 2261.47 106.333   1
   3  -7  -2 2374.38 99.1719   4
   7  -3   2 2183.22 102.325   4
  -5   7   2 2526.50 104.535   2
  -7   5  -2 2609.66 97.9659   3
   5  -7   2 2574.20 103.676   2
   5  -7   2 2518.82 110.838   4
   7   5   2 2403.09 109.514   2
  -5  -7  -2 2517.37 112.938   2
   7   5   2 2578.93 102.146   5
  -7  -5   2 2406.26 109.414   2
   5   7  -2 2387.11 105.403   5
   7  -5  -2 2368.19 110.518   4
  -5  -7  -2 2511.71 99.9741   4
  -7   5  -2 2637.42 102.419   2
  -7   5  -2 2350.67 111.078   1
  -7   5  -2 2413.48 101.007   2
  -5  -7  -2 2561.67 112.466   3
  -7  -5   2 2514.89 109.892   3
  -5   7   2 2511.40 113.321   1
   5   7  -2 2475.90 112.408   2
  -5   7   2 2484.00 103.672   2
   7   5  -2 2570.26 100.579   5
   7   5  -2 2459.64 108.486   2
  -7   5   2 2489.89 98.7194   2
  -7   5   2 2509.97 110.540   1
   5   7   2 2488.02 112.057   2
  -7  -5  -2 2445.94 110.247   2
   7  -5   2 2534.77 112.676   4
  -5   7  -2 2395.08 100.355   5
  -7  -5  -2 2557.59 109.628   3
  -5  -7   2 2426.43 110.462   3
   5  -7  -2 2516.18 101.849   2
   7  -5   2 2586.37 98.0884   2
  -5  -7   2 2384.97 111.649   2
   5   7   2 2546.75 107.277   5
  -5   7  -2 2548.32 111.942   2
  -5   7  -2 2446.73 105.208   2
   5  -7  -2 2498.28 109.540   4
  -5   7  -2 2561.16 116.907   1
  -7   5   2 2519.98 98.8817   2
  -7   7  -2 1946.70 96.3752   1
  -7   7   2 1871.37 80.9790   2
  -7  -7   2 1838.42 92.8243   2
   7   7  -2 1934.30 92.7114   2
   7   7  -2 1990.27 84.1690   5
  -7  -7   2 1896.14 91.7473   3
   7   7   2 1890.99 91.5757   2
  -7   7   2 1958.72 93.9017   1
  -7   7  -2 1930.98 83.6340   2
   7  -7  -2 1974.57 77.4336   2
  -7   7  -2 1968.61 83.8522   2
  -7  -7  -2 1800.55 91.8893   2
   7  -7   2 1892.17 92.5595   4
  -7  -7  -2 1879.51 91.1035   3
  -7   7  -2 1888.23 77.5566   5
  -7   7   2 1993.60 81.7901   2
   7   7   2 1887.07 84.5096   5
   7  -7  -2 1952.76 92.7642   4
  -8   0  -2 93.7642 10.9237   5
   0   8  -2 106.416 17.6272   5
  -8   0   2 111.731 14.7750   3
   0  -8   2 102.060 21.0784   3
  -8   0  -2 117.489 16.6005   2
  -8   0  -2 98.1409 16.6124   2
   8   0   2 102.581 22.2363   4
   0  -8   2 69.4909 18.4474   2
  -8   0   2 94.6718 14.0692   2
   0   8   2 114.127 17.8494   5
  -8   0   2 131.274 14.7352   2
  -8   0  -2 127.244 15.0500   3
   0  -8  -2 103.231 21.9624   3
   0  -8  -2 106.673 14.2721   4
   0   8  -2 89.2581 22.4271   2
  -8   0  -2 98.2171 9.85838   5
   0  -8  -2 123.985 21.0094   2
   8   0  -2 130.470 14.1940   2
   0   8  -2 114.372 22.7581   1
   0   8   2 92.5609 19.8562   1
   0   8   2 120.265 21.2397   2
   8   0  -2 135.211 24.0939   4
   8   2   2 8.54712 16.6551   4
  -2  -8  -2 17.6778 20.0186   2
   2  -8   2 -12.506 14.9248   2
   2   8  -2 -5.7957 15.1310   5
  -8   2  -2 2.96269 8.77025   2
  -8   2  -2 3.04728 11.1692   2
  -8  -2   2 12.7586 13.2089   3
   2  -8   2 13.6545 13.5183   4
   8  -2  -2 17.7433 19.4781   4
   8   2   2 3.75774 13.9588   2
  -2   8   2 4.02759 9.77787   5
  -8  -2   2 17.9899 12.4957   2
   2  -8   2 4.39016 14.2234   3
  -8  -2   2 -3.7298 6.37953   5
  -2   8   2 21.6297 17.0845   1
  -2  -8  -2 -6.6117 13.2062   3
   2   8  -2 -18.358 14.7434   2
  -8  -2   2 -5.2717 11.5380   2
  -8   2  -2 9.55683 6.65169   3
   2   8  -2 -11.003 18.4963   1
  -2   8   2 24.6254 16.4646   2
  -8  -2  -2 13.4614 13.4672   3
  -8  -2  -2 14.9479 13.5283   2
   2  -8  -2 16.0614 15.5040   3
  -8  -2  -2 6.81416 9.31948   5
   2   8   2 -12.711 15.3999   2
  -2   8  -2 -4.9591 13.0682   2
   8  -2   2 25.5433 15.9209   4
   2   8   2 27.6096 16.0345   5
  -2  -8   2 -7.2577 14.4823   3
  -8   2   2 0.59924 7.66194   2
   2  -8  -2 -1.9175 14.6234   2
  -2  -8   2 11.6458 16.2580   2
  -2   8  -2 13.1327 12.8825   5
   8   2  -2 13.0100 17.6745   4
   8   2  -2 1.34203 11.0964   2
   8  -2   2 1.83955 6.96439   2
  -8   2   2 5.35741 8.55134   3
   2   8   2 20.3605 17.1257   1
  -8   2   2 -1.7624 6.60317   2
   2  -8  -2 22.2104 12.7122   4
  -2   8  -2 -12.252 15.0684   1
   8   4   2 11.0627 16.0547   2
   4   8  -2 -5.2200 14.9039   5
  -8  -4   2 27.0277 16.6141   2
  -8   4  -2 14.5488 15.8507   1
   8  -4  -2 25.2057 17.3903   4
  -8   4  -2 34.4054 15.4901   2
   4  -8   2 30.3848 17.2393   4
   8   4   2 38.8124 6.94294   5
  -4   8   2 17.8746 14.4448   2
  -8   4  -2 25.6291 7.64584   3
  -4   8   2 33.1725 18.9003   1
  -4  -8  -2 36.0550 17.8326   3
   4  -8   2 36.5361 15.0909   2
  -4  -8  -2 65.4439 23.5153   2
  -8   4  -2 53.8337 12.8157   2
  -8  -4   2 27.1972 13.9643   3
   4   8  -2 32.7937 18.8297   2
  -4  -8   2 35.5645 16.9803   3
  -8  -4  -2 25.7312 17.9414   2
   8  -4   2 68.7144 18.6630   4
  -4   8  -2 14.4011 11.2059   5
   8   4  -2 30.3412 12.9391   2
  -4  -8   2 48.5785 21.8806   2
   4   8   2 -1.1366 15.8199   5
  -4   8  -2 51.4623 24.0066   1
   4   8   2 9.40394 17.4574   2
  -4   8  -2 47.7531 16.0835   2
   4  -8  -2 12.2758 15.5913   4
  -8   4   2 49.6039 8.34280   2
  -8  -4  -2 37.5705 14.5285   3
  -8   4   2 33.9098 11.1707   2
  -8   4   2 44.3783 15.6324   1
   4  -8  -2 15.5870 12.7876   2
  -8   6  -2 46.3841 12.5738   2
  -8  -6   2 39.6325 20.1119   3
   6   8  -2 15.4526 17.6337   2
  -8   6  -2 15.8326 12.7505   2
  -6  -8  -2 48.6480 12.2137   4
  -6   8   2 45.1988 15.1214   2
   6   8  -2 7.51525 11.5043   5
   8   6   2 38.3574 11.0380   5
  -6   8   2 52.8770 14.1707   2
  -6  -8  -2 27.6285 18.2702   2
   6  -8   2 24.8674 20.1615   4
   6  -8   2 42.5988 13.8471   2
   8   6   2 28.5761 19.4177   2
  -6   8   2 16.8269 19.9797   1
  -8   6  -2 30.6684 18.3950   1
  -6  -8  -2 43.6786 22.4353   3
   8  -6  -2 36.0834 18.2664   4
  -8  -6   2 26.7655 20.0582   2
  -8   6   2 34.0281 10.8805   2
   8  -6   2 19.5588 8.28745   2
  -6   8  -2 53.9059 15.1573   2
  -6   8  -2 19.7934 24.3222   1
   6   8   2 65.5219 23.3883   2
  -6  -8   2 -2.5970 17.6602   2
   8   6  -2 28.4889 15.4986   2
   8  -6   2 54.9171 23.1810   4
   6  -8  -2 33.6575 19.7867   4
  -6   8  -2 28.1971 10.4808   5
  -8   6   2 8.06673 18.5556   1
  -6  -8   2 40.4556 18.5260   3
  -8   6   2 44.0676 10.8529   2
   8   6  -2 39.2046 10.8522   5
  -8  -6  -2 38.6794 16.7206   3
   6   8   2 42.9232 16.2780   5
  -8  -6  -2 14.6327 16.1796   2
   8   8  -2 9.99693 11.4295   5
  -8  -8  -2 27.2763 21.3568   2
  -8  -8   2 0.93991 15.9936   3
   8   8  -2 21.3373 17.8279   2
  -8   8  -2 -1.1646 11.1248   2
  -8   8   2 -7.4852 10.6832   2
  -8  -8   2 21.3960 21.4282   2
   8   8   2 -13.083 20.0459   2
  -8   8   2 9.34342 17.0682   1
  -8  -8  -2 -0.2764 16.4950   3
  -8   8  -2 18.1222 9.52365   5
   8   8   2 24.7878 13.7101   5
  -8   8  -2 37.9463 24.0356   1
   8  -8  -2 15.0438 20.5318   4
   8  -8   2 8.34216 20.6465   4
  -9   1  -2 1681.71 67.6410   2
   9  -1  -2 1375.86 74.9591   4
  -1   9   2 1512.39 72.6757   1
  -9   1  -2 1499.55 67.3577   2
  -9   1  -2 1510.63 64.0983   3
   1   9  -2 1465.42 78.2187   2
  -1   9   2 1454.84 75.9554   2
  -1  -9  -2 1554.04 76.7160   3
   1  -9   2 1541.92 74.1239   3
  -9  -1   2 1596.99 69.4583   3
   1  -9   2 1520.92 75.9961   2
   1   9  -2 1483.35 73.3803   5
  -9   1  -2 1522.90 58.8942   5
  -1   9   2 1425.46 70.1521   5
  -9   1  -2 1516.45 59.0569   5
  -1  -9  -2 1568.45 78.3998   2
   9   1   2 1503.72 68.7744   2
  -9  -1   2 1570.39 68.4984   2
  -9  -1   2 1512.35 68.4108   2
   9   1   2 1487.38 75.9262   4
   1  -9   2 1516.86 69.6499   4
   1   9  -2 1501.80 75.3681   1
  -1  -9  -2 1570.40 65.3574   4
  -9  -1   2 1497.97 61.8075   5
  -1   9  -2 1611.18 78.0292   1
   9   1  -2 1531.81 77.3798   4
  -9  -1  -2 1447.76 70.1744   2
  -9  -1  -2 1656.20 70.4344   2
  -9  -1  -2 1635.41 64.6085   5
   9  -1   2 1530.26 65.5047   2
  -1   9  -2 1490.21 71.9787   5
  -1  -9   2 1473.73 77.7027   2
  -9   1   2 1505.33 64.6335   2
  -9   1   2 1589.98 64.7010   2
  -1  -9   2 1533.87 75.0521   3
   1   9   2 1450.63 72.7838   1
   1   9   2 1547.11 78.6543   2
   1  -9  -2 1474.98 67.4291   4
   1   9   2 1494.17 73.0215   5
  -9   1   2 1474.15 66.5244   3
   9  -1   2 1444.29 76.9545   4
  -1   9  -2 1579.55 77.4687   2
  -9  -1  -2 1547.34 67.5571   3
   1  -9  -2 1452.27 74.3635   3
   1  -9  -2 1555.41 76.3683   2
   9  -3  -2 1234.44 66.2275   4
   3  -9   2 1229.32 60.7793   3
  -3   9   2 1207.65 62.7421   2
  -3   9   2 1226.40 65.2093   1
  -9   3  -2 1288.08 50.8430   3
  -3  -9  -2 1206.96 65.1947   3
   3   9  -2 1227.56 69.0423   2
  -9  -3   2 1273.19 61.5467   2
   3   9  -2 1199.95 61.8087   5
   9   3   2 1142.30 59.3347   2
   3  -9   2 1183.48 61.1811   4
   9   3   2 1298.51 64.4410   4
  -3  -9  -2 1207.15 69.0294   2
  -9   3  -2 924.121 56.5537   2
  -9  -3   2 1154.06 60.4792   3
   3   9  -2 1248.22 65.9600   1
  -9   3  -2 1260.10 55.0089   2
   3  -9   2 1182.97 62.1310   2
  -3   9   2 1065.80 56.9753   5
  -3   9  -2 1179.14 58.7306   5
  -9  -3  -2 1173.36 59.2881   3
  -3   9  -2 1259.49 64.2421   2
  -9   3   2 1243.24 54.1468   3
   9   3  -2 1246.15 58.9928   2
   3  -9  -2 1190.93 59.8381   4
  -3  -9   2 1225.57 68.0441   3
  -3   9  -2 1251.49 67.2616   1
  -3  -9   2 1253.36 67.3670   2
   3   9   2 1158.10 62.4588   5
  -9  -3  -2 1143.40 61.2751   2
   3  -9  -2 1290.84 62.2529   2
   9  -3   2 1222.14 67.8856   4
  -9   3   2 1153.11 53.1520   2
  -9   3   2 1222.15 50.4788   2
   3   9   2 1202.77 66.6000   2
  -9   5  -2 1337.79 67.0828   2
  -5   9   2 1356.98 68.3278   2
  -5  -9  -2 1443.87 60.9899   4
   9   5   2 1497.82 72.6777   2
  -9   5  -2 1554.46 58.9348   3
   5  -9   2 1400.68 71.5946   4
  -5  -9  -2 1348.70 75.5097   2
   9  -5  -2 1331.20 75.8805   4
  -9  -5   2 1377.23 72.7525   2
   5   9  -2 1485.77 77.7880   2
  -9   5  -2 1465.74 58.6994   3
  -9   5  -2 1493.68 78.5027   1
   5  -9   2 1390.37 67.5594   2
  -5   9   2 1350.95 74.5662   1
   5   9  -2 1490.51 71.4686   5
  -9  -5   2 1444.24 70.9674   3
  -9   5  -2 1366.46 62.2789   2
   9   5   2 1393.15 58.0094   5
  -5  -9  -2 1532.08 77.7208   3
  -5   9   2 1389.20 63.9513   5
  -5   9  -2 1359.11 65.4416   5
  -9   5   2 1500.73 75.0550   1
  -9   5   2 1450.05 59.0704   2
   5  -9  -2 1426.37 66.3648   2
  -5   9  -2 1409.59 80.9461   1
  -9  -5  -2 1454.97 72.6008   2
   9  -5   2 1335.85 74.2998   4
   9   5  -2 1493.78 71.5502   2
  -9  -5  -2 1541.28 72.4293   3
  -5   9  -2 1512.73 70.7730   2
   5  -9  -2 1432.13 71.7900   4
  -5  -9   2 1372.42 74.9951   3
   5   9   2 1403.03 76.4193   2
  -9   5   2 1273.21 62.1452   2
  -5  -9   2 1407.77 78.0255   2
   5   9   2 1470.49 70.2424   5
   9   7   2 1609.24 68.5996   5
  -7  -9  -2 1523.36 82.3014   3
   7   9  -2 1585.80 74.0860   5
  -7   9   2 1502.74 70.7876   2
  -9  -7   2 1513.32 79.4025   2
  -9   7  -2 1588.07 62.8250   5
   7  -9   2 1485.27 79.9249   4
  -9   7  -2 1592.93 86.1999   1
   9   7   2 1411.54 78.5744   2
  -7   9   2 1510.08 84.6430   1
   9  -7  -2 1558.52 82.5423   4
  -9  -7   2 1520.74 79.3349   3
   7   9  -2 1426.80 79.5789   2
  -7  -9  -2 1520.45 84.1347   2
  -9   7  -2 1582.96 68.9592   2
  -9  -7  -2 1556.07 81.7888   2
  -7   9  -2 1533.77 68.3239   5
  -9   7   2 1535.19 83.1071   1
   9   7  -2 1609.20 67.7875   5
  -7  -9   2 1555.18 83.5392   2
   7  -9  -2 1532.72 78.2509   4
   7   9   2 1492.79 73.1861   5
  -9  -7  -2 1436.80 76.4102   3
   9  -7   2 1641.12 83.5100   4
  -7   9  -2 1527.16 88.5096   1
  -7  -9   2 1533.23 80.2309   3
   7   9   2 1689.73 84.6073   2
   9   7  -2 1505.69 77.5945   2
  -7   9  -2 1523.38 72.4021   2
  -9   7   2 1594.51 66.4421   2
  -9  -9  -2 924.434 57.8289   3
  -9   9   2 933.116 64.3676   1
   9   9   2 911.870 61.3071   2
  -9  -9   2 900.047 59.5117   2
  -9   9  -2 873.843 48.6461   2
   9  -9  -2 867.889 59.6458   4
   9  -9   2 946.354 61.7282   4
  -9   9  -2 874.323 44.0639   5
   9   9   2 883.179 48.8713   5
  -9   9  -2 967.577 64.2110   1
  -9  -9  -2 886.574 62.0028   2
   9   9  -2 875.156 59.7950   2
  -9  -9   2 887.333 59.7046   3
  -9   9   2 898.863 46.5086   2
   0  10  -2 -24.176 18.8602   1
   0  10  -2 22.5705 16.9115   5
  10   0  -2 21.5861 20.4473   4
 -10   0  -2 22.6977 10.3502   3
   0 -10   2 -1.5600 15.8774   2
   0 -10  -2 22.7006 11.5453   4
 -10   0  -2 28.4402 7.40813   5
   0 -10  -2 14.0685 15.9980   2
   0  10   2 27.5591 20.3570   2
   0  10   2 19.9168 17.5543   1
   0 -10  -2 33.9017 16.6482   3
   0 -10   2 30.3483 18.4648   3
   0 -10   2 26.1693 13.9801   4
 -10   0   2 26.5362 7.50616   5
 -10   0  -2 27.6199 11.5889   5
 -10   0   2 10.1560 9.70885   2
 -10   0   2 20.5516 10.1961   3
   0  10   2 7.94988 13.5817   5
   0  10  -2 -3.9910 18.7265   2
  10   0  -2 3.90384 10.6604   2
 -10   0   2 20.1971 5.07302   5
 -10   0   2 31.1689 11.6322   2
  10   0   2 59.9342 21.7051   4
 -10   0  -2 27.0201 12.6049   2
 -10   0  -2 4.64287 11.6179   2
   2 -10   2 27.0828 18.5060   2
 -10   2  -2 54.1384 13.1538   2
   2  10  -2 29.6073 22.7661   2
  -2  10   2 46.5254 16.5552   2
  -2  10   2 66.9036 17.1873   5
 -10  -2   2 47.7779 14.3868   2
  10   2   2 24.1147 14.4036   2
   2  10  -2 19.3392 20.5222   1
  -2  10   2 17.9815 17.3644   1
   2 -10   2 50.8501 17.6285   4
 -10   2  -2 36.5212 9.32326   3
 -10  -2   2 36.0001 16.0195   3
   2 -10   2 38.9942 17.7137   3
  -2 -10  -2 38.7564 10.3308   4
   2  10  -2 34.8819 15.6290   5
  10   2   2 14.1447 18.3710   4
 -10  -2   2 45.3937 10.1165   5
  -2 -10  -2 9.57672 15.7900   3
 -10   2  -2 31.7390 14.6656   2
  10  -2  -2 24.9238 17.6259   4
  -2 -10  -2 66.7641 20.6120   2
 -10  -2  -2 4.05472 13.9854   2
 -10   2   2 46.3008 9.74742   2
 -10  -2  -2 11.7242 12.8767   3
   2 -10  -2 53.6376 19.4943   2
  -2  10  -2 26.5472 15.9068   5
  -2  10  -2 38.9829 19.5156   2
   2 -10  -2 45.3249 16.1207   4
 -10  -2  -2 58.9985 12.7177   5
   2  10   2 54.1916 20.7422   2
   2  10   2 43.4087 20.0005   1
  10   2  -2 20.5898 16.9446   4
 -10   2   2 26.5077 10.2905   3
 -10   2   2 35.7818 10.5860   2
   2 -10  -2 41.9078 18.5121   3
  10  -2   2 -0.0060 15.4745   4
   2  10   2 54.0602 16.7886   5
  10   2  -2 16.6290 12.3198   2
  -2 -10   2 39.4303 18.6500   2
  -2  10  -2 16.2065 21.0290   1
  -2 -10   2 31.4985 17.7057   3
 -10   4  -2 45.2667 13.4853   2
   4  10  -2 66.0437 19.9802   5
 -10  -4   2 65.9900 18.5691   3
   4 -10   2 66.6647 18.5107   2
  -4 -10  -2 67.6931 20.8680   3
  -4 -10  -2 46.2212 23.8743   2
 -10  -4   2 63.9615 19.0542   2
 -10   4  -2 81.3542 14.2454   2
  -4  10   2 67.5813 19.7609   2
  -4  10   2 97.0260 22.5027   1
   4 -10   2 95.8647 20.5975   4
 -10   4  -2 62.3980 21.1612   1
  -4  10   2 67.8029 16.0519   5
  10   4   2 43.5046 17.1035   2
   4  10  -2 58.5331 21.7527   2
  10  -4  -2 78.1700 22.3370   4
 -10   4  -2 74.3692 9.44547   3
   4  10   2 102.721 21.8517   5
   4 -10  -2 95.0411 18.9174   2
  10  -4   2 34.4845 19.5331   4
  -4 -10   2 77.0258 21.5502   3
   4  10   2 68.7800 23.1901   2
  -4  10  -2 91.3655 21.5288   2
 -10   4   2 71.8434 9.87667   2
   4 -10  -2 78.3915 18.8051   4
 -10   4   2 77.2497 12.2761   3
 -10  -4  -2 63.3199 17.1390   2
  -4  10  -2 78.4496 22.5125   1
 -10   4   2 69.9740 10.2211   2
  10   4  -2 71.1108 17.4220   2
 -10  -4  -2 75.3954 19.0325   3
  -4 -10   2 80.6641 22.3708   2
  -4  10  -2 47.0761 16.1909   5
  -6  10   2 109.751 16.4237   5
  -6 -10  -2 65.3439 25.5183   3
  -6  10   2 126.908 26.3005   1
   6 -10   2 87.7124 23.0776   4
 -10  -6   2 90.2233 23.1383   2
 -10   6  -2 114.025 8.55465   5
   6  10  -2 102.020 24.7690   2
 -10   6  -2 108.387 27.9368   1
  -6 -10  -2 111.074 25.0704   2
 -10  -6   2 85.9145 22.2325   3
  10  -6  -2 95.4383 24.1981   4
  -6  10   2 166.086 23.7582   2
 -10   6  -2 131.318 16.0158   2
 -10   6  -2 117.798 13.2032   3
   6 -10   2 141.651 23.3149   2
  10   6   2 143.173 24.8954   2
   6  10  -2 69.1538 19.4997   5
  10  -6   2 142.525 29.2615   4
 -10  -6  -2 120.407 21.8843   3
  -6  10  -2 109.090 17.4991   5
 -10  -6  -2 109.089 22.4235   2
   6 -10  -2 160.885 25.6983   4
 -10   6   2 106.021 24.9152   1
   6  10   2 115.614 22.2795   5
  -6  10  -2 131.174 21.9127   2
  -6 -10   2 76.3521 22.2298   3
 -10   6   2 93.0625 11.9902   2
  -6 -10   2 123.157 25.0634   2
  10   6  -2 119.441 22.6889   2
   6  10   2 69.7105 23.8185   2
  -6  10  -2 40.2719 27.2406   1
   8  10  -2 -10.394 13.4440   5
   8 -10   2 0.65875 22.0537   4
  10  -8  -2 18.1844 23.5664   4
  -8 -10  -2 26.6357 19.2910   3
  -8 -10  -2 19.2961 24.1679   2
  -8  10   2 8.34000 24.1323   1
  -8  10   2 5.11210 10.8142   5
 -10  -8   2 35.9900 22.2582   2
  10   8   2 -34.028 19.2989   2
 -10   8  -2 10.6050 13.7548   2
  -8  10   2 1.02516 12.3497   2
 -10   8  -2 -6.4550 24.3350   1
 -10   8  -2 16.7006 9.13573   5
 -10  -8   2 41.1331 22.3673   3
   8  10  -2 7.42118 18.7657   2
  10   8  -2 32.0229 20.9107   2
   8 -10  -2 -17.884 19.6296   4
  10  -8   2 1.56903 23.0311   4
  -8 -10   2 32.4826 20.4137   2
  -8  10  -2 14.4232 16.0304   2
 -10   8   2 13.3639 18.3329   1
   8  10   2 12.3902 15.6195   5
   8  10   2 -8.1584 18.8508   2
  -8 -10   2 41.5376 19.4665   3
 -10  -8  -2 6.34240 16.4302   3
 -10   8   2 9.91788 10.5068   2
  -8  10  -2 7.78374 21.6686   1
 -10  -8  -2 -4.6323 16.8491   2
  -8  10  -2 37.8060 13.6477   5
  10 -10   2 33.0015 25.0400   4
  10  10  -2 -7.0394 18.6186   2
 -10  10  -2 41.2834 29.6670   1
 -10  10   2 -4.2453 14.1852   2
 -10  10  -2 28.2254 14.0063   5
 -10 -10   2 -17.181 22.8643   2
 -10 -10  -2 44.7393 25.5645   2
 -10  10   2 8.50623 10.7889   5
  10 -10  -2 17.5413 24.4722   4
 -10  10  -2 11.8581 14.7858   2
 -10  10   2 39.8129 29.2835   1
 -10 -10  -2 15.3923 19.6486   3
  10  10   2 53.6791 25.3495   2
 -10 -10   2 14.7230 19.7114   3
 -11   1  -2 1135.19 47.0425   5
  11   1   2 1030.74 63.2321   4
  -1 -11  -2 1078.86 50.6136   4
  -1  11   2 1131.86 64.1549   2
   1 -11   2 1093.75 61.4684   3
 -11   1  -2 1145.35 54.5463   2
  -1  11   2 1099.59 61.0866   1
  11  -1  -2 1121.38 64.2952   4
 -11   1  -2 1108.23 45.9313   5
 -11  -1   2 1019.06 53.5649   3
 -11  -1   2 1068.33 54.3498   2
   1  11  -2 1012.85 65.4901   2
   1 -11   2 1089.97 63.6482   2
   1 -11   2 1072.30 55.0122   4
   1  11  -2 1015.38 58.1298   5
  -1 -11  -2 1038.74 61.0920   3
   1  11  -2 1106.51 65.0855   1
  -1  11   2 1063.06 58.3124   5
  -1 -11  -2 1125.43 65.7560   2
 -11   1  -2 1127.38 49.9860   3
   1  11   2 1121.91 60.1098   1
  11  -1   2 1083.77 64.9509   4
   1 -11  -2 1087.61 53.6409   4
  -1 -11   2 957.917 52.0905   4
   1  11   2 1051.29 59.8291   5
  11   1  -2 1074.14 62.7564   4
  -1 -11   2 1092.83 63.9222   2
 -11  -1  -2 1082.66 52.7228   3
   1 -11  -2 1074.29 61.1862   2
 -11  -1  -2 1067.34 55.5743   2
   1 -11  -2 1121.93 62.6402   3
  -1  11  -2 1095.03 59.6570   5
  -1  11  -2 1035.04 64.0735   1
 -11   1   2 1101.92 52.0846   3
  -1  11  -2 1065.90 62.0667   2
   1  11   2 1077.87 65.5941   2
  -1 -11   2 1108.34 63.3394   3
 -11   1   2 1052.55 50.6352   2
 -11  -3   2 1199.80 60.1153   3
 -11  -3   2 1116.13 59.2298   2
  -3  11   2 1164.27 64.0584   2
  11   3   2 1121.27 57.4265   2
   3  11  -2 1061.22 62.2273   5
  11   3   2 1222.55 65.0797   4
   3  11  -2 1096.02 66.4721   2
  11  -3  -2 1196.74 68.9616   4
 -11   3  -2 924.044 55.9348   2
  -3  11   2 1115.76 64.2424   1
  -3 -11  -2 1115.85 66.6856   3
   3 -11   2 1061.51 59.1250   4
 -11   3  -2 1141.19 48.6565   3
  -3  11   2 999.205 57.5977   5
   3  11  -2 1100.46 67.3296   1
  -3 -11  -2 1064.10 65.6020   2
   3 -11   2 1229.76 63.9601   2
   3 -11   2 1145.82 60.7068   3
  -3  11  -2 1096.93 59.3246   5
  11  -3   2 1197.65 66.9248   4
   3 -11  -2 1099.40 58.1331   4
  -3  11  -2 1178.83 68.6381   1
   3 -11  -2 1178.46 62.6587   2
  -3 -11   2 1144.86 65.1719   3
 -11   3   2 1292.02 51.9003   2
  11   3  -2 1079.66 55.9262   2
   3  11   2 1059.15 60.5334   5
 -11   3   2 1044.29 52.2303   2
  -3  11  -2 1081.11 63.5779   2
 -11   3   2 1260.30 52.6660   3
   3  11   2 1108.40 66.1128   2
  -3 -11   2 1000.73 65.0187   2
 -11  -3  -2 1168.93 58.5982   3
 -11  -3  -2 1164.25 60.8051   2
  -5 -11  -2 707.226 56.0237   3
 -11   5  -2 770.314 59.4883   1
   5  11  -2 823.898 59.7981   2
  11   5   2 858.422 50.6141   2
  -5 -11  -2 839.892 60.0122   2
  11  -5  -2 830.837 59.0384   4
 -11  -5   2 830.171 52.3548   2
   5  11  -2 813.711 49.5680   5
   5 -11   2 803.234 52.0263   4
  -5  11   2 781.126 45.6823   5
  -5  11   2 820.105 56.7376   1
 -11  -5   2 765.326 50.2020   3
  -5  11   2 870.927 51.0717   2
 -11   5  -2 847.369 41.6931   2
   5 -11   2 797.035 48.5177   2
   5  11   2 786.067 51.7135   5
 -11  -5  -2 738.512 52.0886   2
 -11  -5  -2 883.091 51.7546   3
   5 -11  -2 783.902 50.7795   4
  11   5  -2 811.921 49.1616   2
  -5 -11   2 792.440 55.2350   3
 -11   5   2 844.703 40.6907   3
  -5  11  -2 840.383 52.1905   2
 -11   5   2 802.134 36.9970   2
   5  11   2 897.571 60.9604   2
  -5  11  -2 788.309 47.7989   5
  -5 -11   2 842.941 59.5789   2
 -11   5   2 904.777 59.1428   1
  -5  11  -2 921.976 62.8806   1
  11  -5   2 778.333 55.6465   4
  -7 -11  -2 1242.77 72.4617   2
  -7  11   2 1090.00 56.6231   5
   7  11  -2 1308.38 65.1055   5
  -7  11   2 1128.42 61.9285   2
   7  11  -2 1160.46 70.4232   2
   7 -11   2 1289.20 69.5043   4
  11   7   2 1157.87 66.5354   2
 -11  -7   2 1199.10 67.8005   3
 -11   7  -2 1217.12 72.7605   1
 -11   7  -2 1201.44 49.1153   5
  -7 -11  -2 1206.22 72.0359   3
  11  -7  -2 1128.39 72.0431   4
 -11   7  -2 1143.54 54.6863   2
  -7  11   2 1200.60 74.3873   1
 -11  -7   2 1285.96 70.4880   2
  11   7  -2 1092.59 64.9537   2
  -7  11  -2 1124.14 62.3208   2
 -11  -7  -2 1212.64 67.7860   2
   7  11   2 1216.52 71.2554   2
  -7 -11   2 1186.28 71.1071   2
 -11  -7  -2 1165.75 66.3431   3
 -11   7   2 1117.91 69.0554   1
  -7 -11   2 1249.02 73.1092   3
  11  -7   2 1103.79 71.4324   4
  -7  11  -2 1189.09 78.2145   1
  -7  11  -2 1103.67 57.9739   5
   7  11   2 1156.33 63.6978   5
   7 -11  -2 1233.33 68.1955   4
 -11   7   2 1142.27 51.4812   2
  11   9   2 1051.28 65.3395   2
 -11   9  -2 1043.69 52.1770   2
 -11  -9   2 969.418 61.2877   3
 -11   9  -2 993.647 47.2523   5
  -9 -11  -2 1052.60 69.2758   2
  -9 -11  -2 972.155 62.9198   3
  -9  11   2 887.178 71.1380   1
  -9  11   2 963.511 50.0035   5
   9 -11   2 974.624 62.6218   4
  11  -9  -2 1053.25 68.3761   4
 -11   9  -2 1131.38 73.8660   1
   9  11  -2 1147.34 69.3029   2
  -9  11   2 1023.54 53.9996   2
 -11  -9   2 1082.22 67.1373   2
   9  11   2 1010.54 64.8250   2
 -11  -9  -2 970.481 65.9356   2
  -9  11  -2 949.338 51.4687   5
  -9 -11   2 920.720 67.9141   2
  11   9  -2 1084.50 64.5600   2
  -9  11  -2 950.982 54.4054   2
 -11   9   2 1073.88 70.7561   1
 -11   9   2 948.736 44.1084   5
 -11   9   2 1050.82 49.5395   2
  -9  11  -2 903.814 75.1464   1
   9 -11  -2 984.130 64.5766   4
  -9 -11   2 995.831 64.7837   3
  11  -9   2 1073.41 68.9353   4
 -11  -9  -2 996.043 64.5879   3
  11  11  -2 613.147 54.4324   2
 -11 -11   2 704.854 56.6299   3
 -11  11  -2 768.087 63.7820   1
 -11  11   2 630.763 36.5507   5
 -11  11   2 662.482 39.3868   2
 -11 -11   2 527.783 51.1484   2
  11 -11   2 702.341 56.7750   4
 -11 -11  -2 756.201 52.8252   3
  11  11   2 637.300 55.3905   2
 -11  11  -2 687.816 39.4803   5
 -11  11   2 663.410 62.0912   1
 -11  11  -2 698.237 42.3181   2
 -11 -11  -2 603.354 56.5476   2
  11 -11  -2 660.292 55.6421   4
  12   0   2 -5.5480 16.8427   4
   0 -12   2 23.3307 18.1266   2
   0 -12  -2 28.0219 13.8453   4
 -12   0  -2 4.66905 13.6273   5
   0 -12   2 17.4939 17.0246   3
   0  12  -2 32.7200 18.9871   5
 -12   0   2 14.8999 10.8407   3
   0 -12  -2 5.01874 20.0629   3
   0 -12   2 3.36591 14.0566   4
 -12   0   2 4.35777 13.6001   2
   0  12   2 22.5992 18.6229   5
   0  12  -2 18.0452 22.7182   1
   0  12   2 -2.4728 16.6085   2
   0  12  -2 1.59409 17.8286   2
 -12   0  -2 -0.9028 10.2603   3
  12   0  -2 24.3545 20.0819   4
 -12   0   2 -2.4199 11.6532   5
 -12   0  -2 21.1497 12.5187   2
   0 -12  -2 74.3827 22.7968   2
   0  12   2 34.4067 20.3712   1
   2 -12   2 -1.9771 18.7111   2
 -12   2  -2 5.68729 8.27123   3
 -12  -2   2 -1.3529 15.0818   2
   2 -12   2 4.42188 18.2239   3
  -2  12   2 19.8716 16.7137   5
  -2 -12  -2 -17.013 21.0265   3
  -2  12   2 14.6093 19.2772   1
 -12  -2   2 -10.227 15.6557   3
  -2 -12  -2 15.5594 11.3611   4
  -2  12   2 24.2944 20.7458   2
   2 -12   2 44.8299 17.5637   4
   2  12  -2 30.1341 19.8837   5
 -12   2  -2 5.35581 6.34804   5
 -12   2  -2 2.55541 15.5783   2
  -2 -12  -2 25.4399 23.1577   2
   2  12  -2 20.4319 19.4588   2
  12  -2  -2 -8.1967 18.0075   4
   2  12  -2 17.6994 22.1483   1
  12   2   2 -32.133 19.1882   4
  -2 -12   2 11.7628 18.3555   3
 -12   2   2 5.91191 11.8933   2
 -12  -2  -2 3.77793 13.8224   2
   2 -12  -2 27.3387 19.7941   2
  -2 -12   2 35.5757 24.0439   2
   2 -12  -2 9.85884 19.0656   3
   2  12   2 11.2593 23.9323   2
 -12   2   2 -3.0046 9.16657   3
  -2  12  -2 22.3123 20.7554   2
   2  12   2 21.9709 19.5836   5
  12  -2   2 2.50909 17.4832   4
   2 -12  -2 11.5004 15.7968   4
  -2  12  -2 9.64913 14.0936   5
 -12  -2  -2 7.58481 12.4719   3
  -2  12  -2 10.9347 21.1716   1
   2  12   2 -0.3057 20.5708   1
  12   2  -2 -26.421 19.6509   4
 -12   4  -2 12.1450 4.51509   5
 -12   4  -2 24.5294 24.7210   1
 -12  -4   2 7.43525 15.9712   3
   4 -12   2 1.51935 17.5042   2
   4  12  -2 -11.734 18.0842   5
  -4  12   2 25.6175 16.4197   5
 -12  -4   2 -13.927 18.0449   2
   4 -12   2 -11.361 16.6520   4
  -4 -12  -2 -1.9809 18.5946   3
   4  12  -2 37.5247 20.8884   2
 -12   4  -2 3.00090 12.4833   2
  -4  12   2 1.43527 15.6764   2
  -4 -12  -2 -8.4526 18.7365   2
  12  -4  -2 -11.567 23.0359   4
  -4  12   2 7.20166 19.6903   1
   4  12   2 25.0254 16.5640   5
   4 -12  -2 19.7717 19.2754   2
 -12  -4  -2 13.5943 17.1190   2
  -4  12  -2 36.4840 18.1343   5
  -4  12  -2 -9.3933 23.0129   1
   4 -12  -2 8.90557 15.7540   4
 -12   4   2 8.89458 8.59690   2
  12  -4   2 30.3576 24.1099   4
 -12   4   2 13.6789 11.5224   3
  -4  12  -2 -4.5444 18.9106   2
  -4 -12   2 -5.1835 22.5305   2
   4  12   2 1.16848 19.7798   2
 -12  -4  -2 0.22085 15.5317   3
  -4 -12   2 -19.303 21.0031   3
 -12  -6   2 26.0833 20.1409   2
 -12   6  -2 -26.467 23.3094   1
   6  12  -2 36.6061 27.8105   2
   6  12  -2 35.0233 19.4316   5
  12  -6  -2 -5.5021 18.6887   4
 -12   6  -2 18.2388 11.6589   2
 -12  -6   2 37.5788 19.9066   3
  -6  12   2 12.7231 17.4060   2
   6 -12   2 -6.2533 19.1971   4
  -6  12   2 7.51085 14.2579   5
  -6 -12  -2 20.5426 24.0652   3
  -6 -12  -2 49.0806 27.4906   2
 -12   6  -2 8.71899 5.64829   5
  -6  12   2 17.9843 23.5088   1
 -12  -6  -2 27.0503 20.8224   2
   6 -12  -2 27.6583 19.5268   4
   6  12   2 27.6827 26.3973   2
  12  -6   2 47.9104 25.1262   4
 -12  -6  -2 -14.690 17.3002   3
  -6  12  -2 13.7913 15.4629   5
   6  12   2 32.5744 20.5953   5
 -12   6   2 5.99874 7.61725   2
  -6 -12   2 -10.491 22.7394   2
  -6 -12   2 -11.490 22.9074   3
 -12   6   2 -33.844 16.3317   1
  -6  12  -2 16.4598 20.6896   1
  -6  12  -2 5.22192 19.7047   2
   8  12  -2 0.38328 16.7878   5
 -12   8  -2 -0.8392 8.62031   5
  -8  12   2 1.54243 14.7313   5
  12  -8  -2 4.04407 23.6973   4
 -12  -8   2 27.8181 23.5995   2
  -8  12   2 4.95609 25.1364   1
  -8 -12  -2 14.5951 19.4966   3
   8 -12   2 4.43352 21.6688   4
 -12   8  -2 -6.8690 25.0076   1
   8  12  -2 44.4827 23.3995   2
 -12   8  -2 -15.434 12.0279   2
  -8  12   2 -6.7198 14.7872   2
  -8 -12  -2 14.5385 24.7046   2
 -12  -8   2 58.1722 23.5010   3
  -8  12  -2 62.9798 31.9414   1
  12  -8   2 -2.4872 20.2447   4
   8  12   2 38.8371 19.2388   5
  -8  12  -2 -15.596 15.6102   2
   8 -12  -2 55.6241 23.2879   4
 -12  -8  -2 -25.709 19.8563   2
 -12   8   2 5.16269 19.7953   1
  -8 -12   2 -9.3784 25.1435   2
 -12   8   2 -4.2832 9.26025   2
   8  12   2 14.5862 26.4273   2
  -8  12  -2 14.4120 14.7093   5
  -8 -12   2 13.1983 26.1024   3
 -12  -8  -2 39.3673 18.3828   3
 -12 -10   2 7.98356 23.4061   3
 -10 -12  -2 50.1056 29.0271   2
  10 -12   2 12.9737 20.4382   4
 -10  12   2 -8.6968 26.9845   1
 -10 -12  -2 31.2472 25.7716   3
 -12  10  -2 50.3641 26.7940   1
 -12 -10   2 -14.287 19.3190   2
 -12  10  -2 12.5417 12.1162   2
 -12  10  -2 41.3415 12.2995   5
  12 -10  -2 23.9289 21.8889   4
 -10  12   2 2.40078 15.5657   2
 -10  12   2 11.2379 13.3070   5
  10  12  -2 26.7467 26.4100   2
 -10 -12   2 2.66243 20.5383   2
  10  12   2 49.8852 28.9226   2
 -10  12  -2 9.89513 14.7733   5
 -12  10   2 -3.9828 10.0812   5
 -10  12  -2 36.5967 16.3145   2
 -12  10   2 10.1449 27.3226   1
 -12  10   2 10.6833 12.5074   2
  10 -12  -2 23.0670 25.5280   4
 -12 -10  -2 -7.4677 21.9305   2
 -12 -10  -2 6.80660 22.6707   3
  12 -10   2 -10.908 23.8375   4
 -10  12  -2 -29.864 28.8084   1
 -10 -12   2 7.92752 21.5318   3
 -12  12   2 6.22725 13.2216   2
 -12 -12  -2 11.3344 28.0964   2
  12 -12  -2 44.6050 26.8167   4
 -12  12   2 17.6635 14.8964   5
 -12 -12   2 -3.7615 26.1623   2
  12 -12   2 -12.731 26.5369   4
 -12  12  -2 2.99594 14.7649   2
 -12  12  -2 -2.4876 31.8797   1
 -12  12   2 -40.462 28.7129   1
 -12  12  -2 13.1634 14.8863   5
 -12 -12  -2 2.75343 20.2766   3
 -12 -12   2 -27.163 24.2560   3
 -13  -1   2 1229.43 58.0578   2
  -1  13   2 1065.23 64.2769   1
   1  13  -2 1131.65 69.0065   1
   1  13  -2 1129.84 70.3891   2
   1 -13   2 1164.08 67.9430   2
 -13   1  -2 1120.11 56.9040   2
 -13  -1   2 1211.16 57.5397   3
  13  -1  -2 1152.38 68.3573   4
  -1  13   2 1011.82 60.0483   5
   1 -13   2 1107.68 57.0478   4
 -13   1  -2 1207.96 53.9341   5
   1  13  -2 1093.77 62.6104   5
  -1 -13  -2 1119.13 66.9449   2
  13   1   2 1147.07 69.0246   4
  -1  13   2 1150.25 68.4142   2
   1 -13   2 1078.95 64.3084   3
  -1 -13  -2 1113.20 67.3541   3
   1  13   2 1005.67 63.3669   5
  -1  13  -2 1031.89 65.6022   2
 -13  -1  -2 1087.01 58.8122   2
  -1  13  -2 1153.95 68.6662   1
   1 -13  -2 1070.49 55.6616   4
  13  -1   2 1026.30 68.6163   4
  -1 -13   2 1026.94 66.1198   3
  -1 -13   2 1086.30 68.9118   2
 -13  -1  -2 1054.48 55.3685   3
 -13   1   2 1170.23 49.5676   5
  -1  13  -2 1004.49 60.4886   5
   1 -13  -2 1094.83 66.7752   2
  -1 -13   2 1115.05 55.5991   4
   1  13   2 1168.66 68.1336   2
  13   1  -2 1158.02 69.7320   4
   1  13   2 1079.09 65.2568   1
 -13   1   2 1123.04 54.0262   3
   1 -13  -2 1202.02 66.8670   3
 -13   1   2 1067.47 53.3969   2
  13   3   2 1116.19 66.9301   4
   3  13  -2 1128.51 70.1396   1
   3 -13   2 1101.42 62.3497   3
 -13   3  -2 1023.37 57.1866   2
  -3 -13  -2 1027.09 66.3449   3
  -3  13   2 1061.72 63.6751   2
   3 -13   2 1103.59 60.3756   4
  13  -3  -2 1121.46 68.5769   4
   3  13  -2 1235.59 66.4488   5
 -13  -3   2 1115.60 60.0928   3
  -3 -13  -2 1070.11 70.4892   2
   3 -13   2 1177.44 65.9021   2
  -3  13   2 1153.61 62.5101   5
 -13   3  -2 1142.64 47.1507   5
 -13  -3   2 1080.19 59.5799   2
  -3  13   2 1104.40 65.4672   1
   3  13  -2 1098.33 71.0941   2
  -3  13  -2 1019.82 63.9794   2
  13  -3   2 1247.09 72.9333   4
  -3  13  -2 1122.37 69.3611   1
   3  13   2 1033.32 70.7473   2
   3 -13  -2 1202.94 59.7914   4
  -3  13  -2 1050.12 61.7927   5
 -13  -3  -2 1084.72 58.7006   3
 -13   3   2 1023.91 52.9751   2
  -3 -13   2 1164.08 69.4058   2
   3  13   2 1207.16 66.7033   5
  -3 -13   2 1069.67 68.4359   3
   3 -13  -2 1249.94 67.4075   2
 -13  -3  -2 1212.04 63.7125   2
 -13  -5   2 682.640 46.9795   3
   5  13  -2 635.249 45.6511   5
  -5 -13  -2 732.378 54.7167   2
 -13   5  -2 631.441 28.6628   5
   5  13  -2 618.651 52.9247   2
 -13   5  -2 662.398 53.4853   1
  13  -5  -2 639.004 51.6699   4
   5 -13   2 627.401 46.6474   4
  -5  13   2 700.123 44.1612   5
  -5 -13  -2 538.587 51.4636   3
  -5  13   2 719.748 49.1688   2
 -13  -5   2 658.612 46.9471   2
 -13   5  -2 653.576 34.9509   2
  -5  13   2 677.283 52.8960   1
  13  -5   2 584.833 54.9295   4
 -13   5   2 662.141 56.0077   1
  -5 -13   2 624.123 53.2561   3
  -5  13  -2 660.005 45.1348   5
 -13  -5  -2 716.849 46.5247   3
  -5 -13   2 667.468 53.1018   2
 -13  -5  -2 597.807 46.9730   2
   5  13   2 638.007 45.7073   5
   5  13   2 714.544 57.9784   2
   5 -13  -2 642.773 45.8180   4
  -5  13  -2 608.264 48.3219   2
  -5  13  -2 727.271 57.4386   1
 -13   5   2 616.314 30.6103   2
  -7  13   2 483.748 36.0115   5
  -7  13   2 464.312 50.1477   1
  13  -7  -2 523.613 51.1066   4
   7  13  -2 505.237 49.2426   2
   7  13  -2 502.672 42.0091   5
  -7 -13  -2 549.194 54.0468   2
 -13   7  -2 536.064 30.7885   2
  -7 -13  -2 488.915 49.6371   3
 -13   7  -2 467.659 25.6479   5
 -13  -7   2 517.421 42.9798   2
   7 -13   2 488.427 44.3194   4
 -13   7  -2 526.328 53.7660   1
  -7  13   2 472.802 40.3426   2
 -13  -7   2 572.325 45.7993   3
 -13   7   2 524.490 51.7204   1
  -7  13  -2 488.913 54.9284   1
  -7 -13   2 504.071 48.2107   2
  13  -7   2 528.516 47.1440   4
  -7 -13   2 504.276 47.3043   3
 -13  -7  -2 521.606 46.9895   2
  -7  13  -2 573.513 41.3870   5
   7  13   2 535.568 48.7538   2
   7  13   2 540.234 43.3779   5
  -7  13  -2 418.609 39.8314   2
   7 -13  -2 477.648 43.9222   4
 -13  -7  -2 443.561 39.6483   3
   9  13  -2 462.146 47.0272   2
  -9  13   2 386.236 52.0676   1
  -9 -13  -2 514.605 51.3648   3
 -13   9  -2 518.883 32.6448   2
  -9  13   2 439.683 36.0951   5
 -13  -9   2 558.524 50.1909   2
  -9  13   2 483.176 37.5678   2
  13  -9  -2 563.247 54.1949   4
 -13   9  -2 595.384 59.1717   1
  -9 -13  -2 538.662 54.3113   2
 -13   9  -2 508.546 29.7022   5
 -13  -9   2 478.826 46.4941   3
   9 -13   2 495.460 47.1408   4
  -9  13  -2 513.620 58.3377   1
  -9  13  -2 501.632 38.7655   5
   9  13   2 561.652 53.6878   2
  13  -9   2 455.362 47.1893   4
 -13  -9  -2 519.060 49.0721   2
 -13  -9  -2 371.975 45.1632   3
   9 -13  -2 503.907 46.7731   4
 -13   9   2 548.955 56.2252   1
  -9 -13   2 457.296 47.3002   2
  -9  13  -2 457.190 41.5769   2
  -9 -13   2 525.193 51.9571   3
 -11 -13  -2 365.190 47.9594   3
 -11  13   2 435.000 33.0618   5
 -11  13   2 379.293 33.7150   2
 -13 -11   2 360.137 46.1734   3
 -13  11  -2 443.089 32.2443   2
  11  13  -2 612.215 80.2222   2
 -13  11  -2 400.503 30.9356   5
 -13  11  -2 412.751 52.2535   1
  13 -11  -2 360.765 43.9270   4
 -11  13   2 311.626 44.3996   1
  11 -13   2 472.416 48.8505   4
 -13 -11   2 353.988 45.1546   2
 -11 -13  -2 332.258 43.3350   2
 -13  11   2 441.346 30.1512   5
 -13  11   2 538.384 52.9591   1
 -11 -13   2 469.387 52.5564   2
  11 -13  -2 370.126 42.7566   4
 -13 -11  -2 428.308 45.9822   3
 -11  13  -2 379.571 35.3297   2
 -11  13  -2 382.879 49.6741   1
  11  13   2 414.348 45.1200   2
  13 -11   2 409.024 45.7527   4
 -11 -13   2 415.782 50.0792   3
 -11  13  -2 418.451 34.9839   5
 -13 -11  -2 371.371 46.0403   2
   0  14  -2 72.0595 26.2181   1
 -14   0  -2 54.7384 17.5575   2
   0  14   2 38.1580 23.5988   1
   0  14  -2 59.7939 21.1852   5
   0 -14   2 69.8929 24.7159   3
   0 -14  -2 75.4399 26.7096   2
  14   0   2 89.9559 27.4946   4
   0  14  -2 65.2303 25.8173   2
   0 -14  -2 82.8838 25.7650   3
   0 -14   2 40.1604 24.8375   2
 -14   0   2 46.0450 15.3490   3
   0  14   2 22.6705 21.9972   5
 -14   0   2 49.0107 15.0323   2
  14   0  -2 83.4693 23.4136   4
   0  14   2 76.0828 26.7689   2
 -14   2  -2 -3.0845 11.0276   5
   2  14  -2 16.1554 21.9063   2
   2 -14   2 12.2172 21.5983   2
  -2  14   2 42.8610 21.9843   5
   2  14  -2 25.8567 19.6514   1
  -2 -14  -2 49.7680 23.6638   2
  -2  14   2 42.2549 21.2843   2
   2 -14   2 48.4295 15.9514   4
 -14  -2   2 18.2697 14.4122   3
   2  14  -2 0.60754 16.7227   5
  14   2   2 -4.8913 17.5186   4
 -14   2  -2 1.42453 15.9397   2
  14  -2  -2 40.5335 26.6178   4
 -14  -2   2 28.9423 15.2920   2
  -2  14   2 10.9453 21.0243   1
   2 -14   2 4.93536 20.2093   3
  -2 -14  -2 12.9542 24.2846   3
 -14   2   2 33.9801 13.3356   2
   2 -14  -2 36.5572 19.7937   4
  -2 -14   2 17.8554 24.3090   3
  -2  14  -2 3.23361 16.2914   5
   2  14   2 24.5450 18.3520   5
   2 -14  -2 26.9644 21.2208   2
  -2  14  -2 2.18264 22.7045   1
  14  -2   2 13.7204 20.2815   4
  -2 -14   2 55.2510 26.3493   2
 -14  -2  -2 36.2396 14.8914   3
  -2  14  -2 69.6471 25.7492   2
   2  14   2 21.6178 22.8634   1
 -14  -2  -2 37.4924 16.5193   2
 -14   2   2 30.2571 8.41537   5
   2  14   2 10.4372 26.1792   2
 -14   4  -2 24.4248 8.42214   5
  -4  14   2 29.6080 17.6485   2
 -14  -4   2 9.91145 18.8863   2
  -4 -14  -2 59.5646 27.7801   3
  -4  14   2 43.7653 19.7818   5
   4 -14   2 43.9862 19.4323   4
  -4 -14  -2 24.3478 22.3916   2
   4  14  -2 18.5309 17.9534   5
   4  14  -2 -12.817 21.6746   2
  -4  14   2 12.4962 21.8553   1
 -14   4  -2 1.35782 12.8700   2
  14  -4  -2 28.4001 21.7402   4
 -14  -4   2 6.25455 17.3125   3
 -14   4  -2 11.6014 22.0407   1
  -4 -14   2 72.8635 28.5019   2
  -4  14  -2 6.36693 18.0513   5
  -4  14  -2 40.2142 24.5884   1
   4  14   2 -26.503 16.2408   5
   4  14   2 36.3394 24.1756   2
 -14  -4  -2 20.3712 18.5765   2
   4 -14  -2 28.5603 19.2334   4
  -4  14  -2 49.0434 23.1547   2
  14  -4   2 49.3611 23.4391   4
 -14   4   2 1.33011 8.40355   2
  -4 -14   2 4.83989 20.3617   3
 -14  -4  -2 18.3485 16.9495   3
 -14   4   2 -11.751 23.2583   1
  -6 -14  -2 37.8291 22.9610   3
 -14   6  -2 17.3373 10.1600   2
   6  14  -2 47.1717 24.1559   2
 -14  -6   2 14.7196 18.7619   3
   6  14  -2 -2.9403 19.7165   5
  -6  14   2 5.10863 16.6357   5
  -6 -14  -2 8.62513 22.0866   2
  14  -6  -2 -9.6070 20.1119   4
 -14   6  -2 23.6074 23.6092   1
  -6  14   2 48.3349 25.3574   1
 -14  -6   2 23.5518 19.5565   2
   6 -14   2 18.8375 18.7150   4
  -6  14   2 15.0413 20.0829   2
  -6  14  -2 28.1092 18.8574   5
  -6  14  -2 20.0711 20.7917   2
   6  14   2 46.8080 24.9756   2
  14  -6   2 -0.7266 20.5708   4
  -6 -14   2 -8.7275 20.0270   3
 -14  -6  -2 40.5977 21.5926   2
  -6  14  -2 15.2309 27.7374   1
   6  14   2 1.98339 17.2346   5
 -14   6   2 -4.3173 21.6704   1
 -14  -6  -2 36.4931 19.6359   3
   6 -14  -2 9.43709 19.0573   4
  -6 -14   2 41.0457 29.9509   2
   8 -14   2 39.1960 22.6361   4
  -8  14   2 1.20326 15.7852   5
  -8 -14  -2 28.1830 28.6491   2
 -14   8  -2 -1.7427 28.8462   1
  14  -8  -2 -13.503 25.2407   4
 -14  -8   2 39.5391 22.9854   3
  -8 -14  -2 -24.107 24.1257   3
  -8  14   2 -13.278 16.4371   2
   8  14  -2 -11.243 27.5131   2
  -8  14   2 37.7939 24.7056   1
 -14  -8   2 27.9694 19.6382   2
  -8  14  -2 -4.4927 18.9444   5
   8 -14  -2 23.1390 22.2780   4
  -8 -14   2 6.26417 26.7953   3
 -14   8   2 8.15405 26.4440   1
  -8  14  -2 9.81040 21.2034   2
  14  -8   2 39.2510 28.4358   4
 -14  -8  -2 -26.879 21.5820   2
   8  14   2 -2.2363 23.9651   5
  -8 -14   2 -9.1018 27.1209   2
   8  14   2 24.8358 29.3645   2
  -8  14  -2 57.0444 29.6840   1
 -14  -8  -2 3.93059 20.7908   3
 -14  10  -2 -29.724 28.3186   1
 -14  10  -2 3.45500 12.4151   5
 -14 -10   2 28.0139 24.2274   2
 -14 -10   2 9.56278 22.5454   3
  10  14  -2 28.1888 28.6747   2
 -10 -14  -2 30.2352 22.5643   3
 -10  14   2 13.9751 18.0463   2
  14 -10  -2 47.4476 23.2796   4
  10 -14   2 49.4438 25.4345   4
 -10 -14  -2 82.0166 33.2964   2
 -10  14   2 10.6288 17.6452   5
 -10  14  -2 -10.467 18.3047   5
 -10 -14   2 -2.1022 26.7861   3
 -10 -14   2 45.1469 28.6903   2
 -14 -10  -2 46.6669 24.6105   3
  10  14   2 -12.246 26.6768   2
 -14 -10  -2 33.0387 22.4789   2
 -14  10   2 -4.4278 29.6178   1
 -10  14  -2 -0.5701 16.6004   2
 -10  14  -2 50.8330 33.8043   1
  10 -14  -2 25.7032 20.5286   4
  14 -10   2 14.6064 23.6136   4
  -1  15   2 657.063 52.1399   1
  -1  15   2 684.302 55.0044   2
   1 -15   2 667.248 51.8794   3
   1  15  -2 664.165 58.2126   2
  15   1   2 704.647 56.7794   4
   1 -15   2 650.391 54.2721   2
  -1 -15  -2 594.808 52.4641   2
  15  -1  -2 715.612 54.9749   4
  -1  15   2 808.157 52.9122   5
   1  15  -2 766.168 50.7144   5
   1  15  -2 679.856 52.1296   1
  -1 -15  -2 706.011 55.4461   3
 -15  -1   2 647.471 42.5370   2
 -15   1  -2 774.333 44.5682   2
   1  15   2 754.743 59.3681   2
  -1  15  -2 695.044 51.3960   5
  -1 -15   2 813.319 55.8191   3
   1  15   2 685.518 53.1715   1
  15  -1   2 703.774 54.3255   4
   1 -15  -2 723.626 54.6909   3
 -15   1   2 674.175 40.8393   2
  -1 -15   2 657.959 53.2384   2
  15   1  -2 671.289 55.6052   4
 -15  -1  -2 654.084 44.7426   2
   1 -15  -2 661.694 62.3624   2
  -1  15  -2 675.801 53.0768   2
  -1  15  -2 606.396 54.3942   1
   1  15   2 681.765 51.4971   5
  -3 -15  -2 593.148 55.8281   2
 -15   3  -2 624.782 54.2696   1
   3  15  -2 538.170 44.2984   5
 -15  -3   2 542.637 40.1999   3
  -3  15   2 577.672 48.2930   1
 -15  -3   2 520.956 42.1513   2
 -15   3  -2 515.135 31.4047   5
  15  -3  -2 527.237 53.5469   4
  -3  15   2 522.922 48.5672   2
 -15   3  -2 506.698 37.6375   2
  -3  15   2 557.253 45.6141   5
  -3 -15  -2 693.630 53.1854   3
   3  15  -2 571.209 51.8309   2
   3  15  -2 594.015 53.6709   1
 -15   3   2 562.743 33.0597   2
 -15  -3  -2 536.184 43.8693   2
  -3  15  -2 513.274 45.0459   5
   3  15   2 653.177 50.2553   5
  -3 -15   2 572.703 52.2158   3
  -3  15  -2 489.789 48.9131   2
 -15  -3  -2 614.783 49.3663   3
   3  15   2 582.605 56.2011   2
  -3  15  -2 611.531 53.1119   1
  15  -3   2 574.447 54.5063   4
  -3 -15   2 653.201 52.3051   2
  -5 -15  -2 750.573 56.7065   3
   5 -15   2 738.408 51.8968   4
  15  -5  -2 690.360 56.3853   4
  -5 -15  -2 667.785 57.1897   2
  -5  15   2 692.859 54.4275   1
  -5  15   2 713.891 50.1202   5
 -15  -5   2 742.944 50.5878   2
  -5  15   2 726.242 53.2488   2
 -15  -5   2 758.093 50.7630   3
   5  15  -2 763.315 51.4201   5
   5  15  -2 691.245 57.9214   2
 -15   5  -2 762.123 41.7406   2
 -15   5  -2 687.896 58.8142   1
  -5  15  -2 716.680 54.8657   2
 -15  -5  -2 685.674 48.0592   3
  -5  15  -2 803.884 60.3637   1
  15  -5   2 649.065 55.8279   4
 -15   5   2 725.997 58.5656   1
  -5 -15   2 652.034 56.8727   2
   5  15   2 844.246 56.4877   5
  -5  15  -2 737.164 51.1085   5
  -5 -15   2 801.888 56.3072   3
   5  15   2 725.388 59.1622   2
 -15  -5  -2 710.131 51.4615   2
  -7  15   2 484.646 41.0081   5
   7  15  -2 597.983 54.5526   2
  -7 -15  -2 497.119 49.0306   3
 -15   7  -2 579.758 54.1357   1
  15  -7  -2 505.859 49.8829   4
 -15  -7   2 440.997 45.9693   2
   7  15  -2 600.542 46.8209   5
  -7  15   2 429.420 42.7451   2
   7 -15   2 536.521 45.9875   4
 -15  -7   2 560.110 46.1587   3
  -7 -15  -2 644.644 58.1511   2
 -15  -7  -2 579.671 48.4648   2
  -7 -15   2 511.551 53.6591   3
  -7  15  -2 547.628 56.3837   1
 -15  -7  -2 534.109 45.6644   3
  -7 -15   2 569.918 53.1130   2
  -7  15  -2 488.776 44.6954   2
   7 -15  -2 564.593 48.2182   4
   7  15   2 507.629 45.1643   5
   7  15   2 448.005 49.9889   2
  -7  15  -2 480.763 41.8957   5
  15  -7   2 461.420 48.3262   4
 -15   7   2 541.463 52.1390   1
   9 -15   2 390.431 44.0965   4
  -9  15   2 357.160 35.9401   2
  -9 -15  -2 393.163 46.6323   2
 -15  -9   2 330.194 42.2069   3
  -9  15   2 334.813 37.2422   5
  15  -9  -2 337.442 44.2761   4
 -15   9  -2 387.431 49.9461   1
   9  15  -2 395.134 51.9008   2
 -15  -9   2 312.734 39.7246   2
  -9 -15  -2 372.528 44.3262   3
  -9  15  -2 421.630 36.7893   5
 -15  -9  -2 408.113 46.9471   2
 -15   9   2 366.484 48.8001   1
  -9 -15   2 362.025 45.4498   2
   9  15   2 317.771 43.5711   2
   9 -15  -2 440.958 44.4884   4
  -9  15  -2 333.375 46.2030   1
  15  -9   2 374.005 46.7011   4
  -9 -15   2 478.116 50.3203   3
 -15  -9  -2 399.220 43.8156   3
  -9  15  -2 443.984 42.0976   2
   0  16   2 23.4549 27.1102   2
   0  16   2 51.1306 21.7358   5
  16   0   2 43.2148 22.8132   4
 -16   0   2 31.4970 16.0107   2
   0  16   2 -21.764 20.7067   1
   0 -16   2 6.20640 24.0724   3
 -16   0  -2 -6.8469 14.8656   2
   0  16  -2 21.5890 23.6237   5
   0 -16  -2 39.0830 25.8309   3
  16   0  -2 40.2433 27.4681   4
   0  16  -2 37.8039 22.0830   2
   0  16  -2 20.2093 25.2554   1
   0 -16   2 24.9375 25.3397   2
  16  -2  -2 -0.2929 28.2344   4
   2  16  -2 -24.040 23.5396   1
  -2 -16  -2 117.262 31.8608   2
   2 -16   2 39.4700 24.2366   3
  -2  16   2 36.0545 25.8786   2
   2  16  -2 33.8513 23.4994   2
 -16   2  -2 -8.0003 16.6385   2
  -2  16   2 79.5946 24.2740   1
  -2  16   2 24.0371 19.4351   5
   2  16  -2 22.5858 19.9536   5
 -16  -2   2 19.2257 16.2473   2
  -2 -16  -2 -3.7319 21.2135   3
  16   2   2 32.9892 21.5522   4
 -16   2  -2 50.9539 18.7957   5
  16  -2   2 20.3697 21.8081   4
   2  16   2 88.8535 26.4203   5
  -2  16  -2 40.6296 25.8489   2
  -2  16  -2 27.1859 22.4361   5
 -16  -2  -2 18.5561 18.5363   2
  -2 -16   2 67.0713 24.6622   2
 -16   2   2 39.3558 24.5767   2
   2  16   2 37.3269 25.0992   2
  -2  16  -2 14.3083 24.7077   1
  -2 -16   2 13.4033 20.1854   3
  16  -4  -2 30.8779 29.0009   4
  -4 -16  -2 25.3586 22.2479   3
   4  16  -2 85.4353 25.8011   5
 -16  -4   2 -4.4983 18.3465   2
  -4  16   2 62.0875 25.5705   2
  -4 -16  -2 41.1497 29.5549   2
   4  16  -2 4.83919 23.0686   2
  -4  16   2 -1.6289 20.3925   5
 -16   4  -2 -12.305 23.8825   1
 -16  -4   2 7.71064 23.1340   3
  -4  16  -2 25.7912 22.3085   5
  16  -4   2 -16.306 20.6828   4
  -4 -16   2 1.61602 21.3123   3
  -4  16  -2 -2.5281 22.5697   2
 -16   4   2 -7.9446 20.1841   1
  -4  16  -2 -0.0631 23.7428   1
  -4 -16   2 -4.4815 26.2644   2
 -16  -4  -2 43.4623 19.3171   2
   4  16   2 48.6164 25.9079   5
   4  16   2 -9.2150 22.7778   2
  16  -6  -2 -12.546 27.7272   4
  -6 -16  -2 55.6483 30.2631   3
   6  16  -2 -30.811 22.3815   2
 -16   6  -2 17.7776 24.9980   1
 -16  -6   2 7.34770 21.0101   2
  -6  16   2 -1.8456 19.5298   5
 -16  -6   2 22.8183 19.4299   3
  -6  16   2 10.9643 16.7582   2
  -6 -16  -2 23.6412 29.5337   2
   6  16  -2 7.21151 21.7033   5
  -6  16  -2 45.4368 23.0431   2
  -6 -16   2 -11.624 21.6347   2
  16  -6   2 25.1416 22.0824   4
 -16  -6  -2 16.1700 20.6200   2
   6  16   2 72.1015 32.6445   2
  -6  16  -2 -13.471 15.3142   5
  -6  16  -2 31.4309 27.0195   1
 -16   6   2 2.84974 28.2773   1
  -6 -16   2 -31.096 20.1916   3
   6  16   2 42.5515 25.0861   5
 -16  -6  -2 0.18144 18.9827   3
   1  17  -2 581.050 54.8063   1
  17   1   2 612.950 52.6736   4
 -17   1  -2 574.905 43.1184   2
  -1  17   2 572.406 50.5666   2
   1  17  -2 601.790 53.7994   2
   1  17  -2 679.566 53.6076   5
 -17  -1   2 673.030 41.6472   2
  -1 -17  -2 605.419 54.4479   3
   1 -17   2 572.308 51.9201   3
  -1  17   2 575.463 47.5161   5
  17  -1  -2 615.153 53.6734   4
  -1  17  -2 697.855 58.0979   2
   1  17   2 606.603 54.8671   1
   1  17   2 619.178 53.9355   2
   1  17   2 785.740 55.1472   5
  -1  17  -2 694.970 55.7371   1
  17  -1   2 631.391 58.4847   4
  -1 -17   2 537.657 49.4795   3
  -1  17  -2 635.925 52.9190   5
 -17  -1  -2 598.749 43.1044   2
  -1 -17   2 629.885 69.6360   2
  -3  17   2 410.686 43.0179   5
   3  17  -2 351.896 46.0507   2
  -3 -17  -2 486.736 51.9355   2
  -3 -17  -2 339.462 42.4594   3
   3  17  -2 365.867 39.4275   5
 -17  -3   2 288.104 35.1873   2
  -3  17   2 408.949 46.0765   2
 -17   3  -2 511.265 57.8517   1
  17  -3  -2 461.135 47.1816   4
  -3  17  -2 424.540 47.8250   1
 -17  -3  -2 376.219 35.9992   2
  -3  17  -2 340.224 37.6642   5
   3  17   2 348.873 48.4667   2
  -3 -17   2 356.666 45.4402   3
  17  -3   2 440.830 50.0515   4
   3  17   2 393.295 40.5382   5
  -3  17  -2 445.244 47.4926   2
  -3 -17   2 315.486 41.9753   2
  -5  17   2 507.483 45.5376   5
  -5 -17  -2 543.494 56.8160   2
   5  17  -2 511.959 52.7976   2
  -5 -17  -2 468.571 51.8821   3
 -17   5  -2 454.928 52.6816   1
   5  17  -2 544.371 47.9849   5
 -17  -5   2 455.203 42.1673   2
  17  -5  -2 455.704 55.2513   4
  -5  17   2 579.277 49.3698   2
 -17  -5  -2 519.255 44.3789   2
   5  17   2 521.145 52.4840   2
  -5 -17   2 509.939 57.6649   2
  -5  17  -2 498.105 49.2217   2
   5  17   2 527.225 49.5711   5
  -5 -17   2 535.737 49.7803   3
  -5  17  -2 496.135 46.1446   5
  17  -5   2 535.554 51.9110   4
   0  -1   3 0.80129 2.89058   3
   1   0   3 -0.9221 4.35993   2
   0   1   3 1.20030 2.70997   2
   0  -1  -3 5.88076 4.22171   2
  -1   0  -3 1.15500 3.63871   2
  -1   0   3 4.23095 2.09359   2
   0   1  -3 13.7893 4.77642   2
   0  -1   3 0.82355 2.94643   5
   0   1  -3 -1.4997 2.36080   5
  -1   0   3 -0.5165 2.40278   2
  -1   0  -3 5.82208 3.46118   2
   0   1  -3 1.58041 2.63483   2
   0  -1   3 -3.1778 2.18841   2
   1   0  -3 -1.5112 1.97746   2
   0   1  -3 2.97979 2.46320   3
  -1   0  -3 -1.6090 2.15058   5
   0   1  -3 -11.269 5.10800   1
   1   0   3 0.30495 3.00878   5
   0  -1   3 2.71697 3.82452   1
   0  -1  -3 -0.7531 2.26308   2
   0   1   3 2.35203 3.03929   2
   0  -1   3 -0.6462 4.47406   2
   1   0   3 0.48561 2.59642   2
  -2  -1   3 343.840 19.8228   3
   1   2  -3 376.646 22.7791   1
   2   1   3 370.583 20.8800   2
  -2  -1   3 359.240 19.1863   2
   2  -1  -3 316.807 20.0996   4
  -2  -1   3 312.668 15.8773   5
   1  -2   3 345.312 21.4432   2
  -1  -2  -3 336.963 20.0869   3
  -1  -2  -3 339.522 21.3872   2
  -2   1  -3 338.421 21.9861   1
   2   1   3 362.317 18.2809   4
  -1   2   3 334.436 17.3944   1
  -2   1  -3 291.512 21.9672   2
   1  -2   3 315.590 16.9669   3
   1  -2   3 324.158 16.9046   5
   2   1   3 353.012 17.9355   5
   1   2  -3 377.007 21.8284   2
  -1   2   3 357.715 18.9977   2
  -2  -1  -3 369.808 19.2339   3
  -1  -2   3 343.901 20.7943   2
   2   1  -3 374.459 19.8984   2
   1  -2  -3 355.176 17.1531   1
   1   2   3 348.808 23.2589   2
  -1   2  -3 325.582 20.8348   2
  -2  -1  -3 384.990 20.6214   2
   2  -1   3 312.517 20.4849   4
   2  -1   3 370.091 19.7652   2
   1  -2  -3 325.284 17.7747   2
   1  -2  -3 308.489 18.1017   4
  -1   2  -3 305.763 24.2715   1
  -1  -2   3 327.493 18.4171   5
  -1  -2   3 365.410 20.8648   3
   0   3   3 1.77181 11.6548   2
   0  -3  -3 5.03650 5.65680   4
   3   0   3 -6.8587 5.93350   3
  -3   0   3 6.27035 5.94102   2
  -3   0   3 -2.7814 5.14637   2
   3   0   3 6.23312 10.2661   2
  -3   0   3 -11.229 8.45990   4
   3   0  -3 -2.9054 3.70741   2
   0  -3  -3 9.93775 12.3133   2
   0   3   3 4.40128 7.88955   1
   0   3  -3 -9.7519 10.3244   3
   0  -3   3 6.16544 10.0305   5
   0   3   3 -12.197 11.1402   2
   3   0   3 3.31689 9.58396   4
   0   3  -3 -2.7117 9.02433   5
   0   3  -3 -3.7497 10.4004   2
  -3   0  -3 -5.0308 10.4285   4
  -3   0  -3 -4.6207 4.84921   5
   0  -3   3 0.51955 10.2697   3
   0   3  -3 -7.6841 14.5597   1
   0  -3   3 10.4137 10.4503   2
   3   0  -3 -3.9952 12.1257   4
   0  -3  -3 4.48928 9.73677   3
   3   0  -3 -0.1986 9.45730   3
  -3   0  -3 -2.4204 4.26382   5
  -3   0  -3 0.29677 8.75656   2
  -3   0   3 0.82036 8.62697   3
   0   3   3 7.24642 9.67727   3
  -3   0  -3 -0.0162 8.53803   2
   3   0  -3 -4.6520 5.27319   2
  -3   0  -3 -0.9945 5.55445   3
  -2  -3  -3 236.613 21.2408   3
   2   3  -3 196.855 24.0975   1
   3  -2  -3 160.300 19.2524   4
  -3  -2   3 214.347 19.1715   2
  -3   2  -3 194.028 23.1812   1
   3   2   3 208.037 21.1436   3
   2   3  -3 200.449 22.5618   2
  -3   2  -3 224.198 19.7925   2
   3   2   3 189.659 16.5065   4
  -2   3   3 229.132 17.9300   2
  -3   2  -3 232.396 19.2546   2
   2  -3   3 191.473 22.6697   4
   2   3  -3 187.634 17.0311   5
  -3   2  -3 200.189 10.4392   3
  -2   3   3 221.859 19.6934   1
  -3  -2   3 260.962 22.5130   2
  -2  -3  -3 200.598 12.4216   4
   3   2   3 221.426 17.4113   5
  -2   3   3 202.192 17.2090   2
  -3  -2   3 189.666 19.8188   3
  -2   3   3 200.481 18.6977   4
   2  -3   3 190.020 15.6443   3
  -3  -2   3 224.463 16.4241   5
  -3   2  -3 191.919 19.5062   4
  -2  -3  -3 246.824 26.2706   2
  -3   2  -3 210.040 9.90803   5
   3   2   3 197.798 20.8097   2
   3  -2   3 208.238 15.5664   2
  -2   3  -3 180.957 14.3170   3
  -3  -2  -3 211.462 17.6846   4
   2  -3  -3 209.632 18.1092   4
   2   3   3 194.172 22.4374   2
  -3   2   3 197.590 23.0099   4
   3   2  -3 210.597 15.0922   5
  -3  -2  -3 176.144 22.9112   2
  -2  -3   3 218.601 22.0450   2
  -3   2   3 199.918 11.1147   2
   3   2  -3 199.040 21.9568   2
  -3   2   3 223.356 11.1634   2
  -2  -3   3 201.442 23.5316   3
   2   3   3 196.855 17.8443   5
  -2   3  -3 193.930 14.2582   5
  -2   3  -3 247.830 20.2547   2
  -3  -2  -3 178.756 20.3299   3
   2  -3  -3 217.720 14.5773   2
   3  -2   3 223.265 21.3910   4
  -2   3  -3 249.213 30.5442   1
  -2   3  -3 193.867 17.8737   2
  -2  -3   3 240.491 17.6444   5
  -4   1  -3 16.3012 5.29323   3
   4   1   3 1.11224 9.37291   3
  -4  -1   3 4.61297 4.23545   5
   4   1   3 -10.348 11.4038   2
   4   1   3 7.28872 6.13509   5
  -1   4   3 -3.8252 12.4574   2
  -4   1  -3 10.5724 11.2770   2
  -1  -4  -3 -4.4595 14.6830   3
   1   4  -3 6.34512 13.5047   2
  -4  -1   3 13.7965 9.69783   2
  -4   1  -3 9.86336 11.3088   4
  -4  -1   3 8.77776 12.4135   3
  -4  -1   3 1.23219 9.41617   2
   4  -1  -3 15.9400 15.5066   4
  -1   4   3 15.6261 12.9393   2
   1  -4   3 11.6201 11.5087   3
  -1  -4  -3 39.9844 14.1861   2
  -4   1  -3 -4.7858 10.9124   2
   1  -4   3 10.4579 11.4121   2
  -4  -1   3 19.4422 13.9174   4
   1   4  -3 17.1761 12.4459   5
  -1   4   3 -3.2736 10.5069   1
  -1   4   3 -1.7032 9.00830   4
   4   1   3 1.72557 2.30489   5
   1   4  -3 12.3241 14.1911   1
   4   1   3 17.5550 12.5692   4
   1  -4  -3 -3.6746 12.7943   2
   4  -1   3 -0.7706 11.7208   4
  -4  -1  -3 -5.2974 11.8015   4
   1  -4  -3 20.3745 11.0885   3
   1   4   3 25.1376 12.7064   1
  -1   4  -3 29.0943 11.9139   3
  -4   1   3 4.51185 4.11193   2
  -4   1   3 16.3970 10.9102   4
  -4  -1  -3 -7.1755 11.6295   2
  -4   1   3 13.7809 8.85572   3
  -1  -4   3 12.0517 14.1291   3
  -4  -1  -3 10.4092 8.27314   5
   1   4   3 2.01817 12.8988   2
  -1   4  -3 6.78323 10.2326   5
   4   1  -3 14.9767 14.5787   4
  -4   1   3 11.1729 4.22513   2
   1  -4  -3 9.60502 10.4475   4
  -1  -4   3 -16.208 12.0289   2
  -4  -1  -3 13.3461 9.23034   3
   4  -1   3 18.3024 8.50332   2
  -1   4  -3 25.5677 14.7554   2
   4   1  -3 11.1994 8.95677   2
  -4  -1  -3 2.28561 11.6898   2
  -1   4  -3 10.4911 16.1760   1
  -4   3  -3 36.8931 6.46536   3
   4   3   3 31.4325 14.2478   2
   3  -4   3 17.5236 9.45018   3
  -4  -3   3 52.5927 11.9476   5
  -3   4   3 57.1347 14.4414   1
   3   4  -3 38.8471 15.3351   2
  -3   4   3 49.1324 10.5803   2
  -3  -4  -3 58.2806 19.4507   2
   3  -4   3 54.8623 12.7540   2
  -4   3  -3 28.3911 14.9461   4
   4  -3  -3 40.4091 17.0331   4
   4   3   3 15.3098 11.4429   4
   4  -3  -3 34.8621 4.65559   2
   4   3   3 50.8511 11.8673   5
  -3  -4  -3 12.8334 13.8782   3
  -3  -4  -3 18.8109 8.09432   4
  -3   4   3 63.2010 11.7126   2
  -4  -3   3 52.9878 16.5679   2
  -4  -3   3 30.6969 16.3943   3
  -3   4   3 44.6485 15.5865   4
   3   4  -3 59.5368 13.8558   5
   3  -4   3 41.5231 13.8443   4
  -4  -3   3 39.2310 12.8335   4
  -4   3  -3 32.9334 15.8616   1
  -4   3  -3 39.3004 10.6007   2
  -4   3  -3 35.0045 11.1583   2
   3  -4  -3 14.5147 6.11001   2
  -3   4  -3 48.9256 9.23001   5
  -3   4  -3 26.7255 12.1552   2
  -4   3   3 11.9745 10.9432   1
  -3  -4   3 54.1473 17.4997   3
  -3   4  -3 63.4447 10.4430   3
  -3   4  -3 50.7000 20.5632   1
   4   3  -3 63.9329 16.4212   2
   3  -4  -3 3.27014 11.7648   4
   3   4   3 49.3487 16.2866   2
   3   4   3 40.7152 14.1272   5
  -4  -3  -3 47.0492 11.6458   4
   4   3  -3 35.5847 9.57542   5
  -4   3   3 36.9381 7.40729   2
  -4  -3  -3 39.2321 16.6319   2
  -3  -4   3 34.8734 17.7816   2
  -4  -3  -3 19.4408 14.9576   3
  -3   4  -3 27.4622 12.4215   2
   4  -3   3 44.9102 8.49491   2
  -4   3   3 39.4177 15.8836   4
   4  -3   3 48.4589 14.6625   4
  -5   0  -3 9.60459 10.1577   2
   5   0   3 -7.5817 14.8661   4
   5   0  -3 -2.5719 16.6920   4
  -5   0   3 -9.7389 9.10071   3
  -5   0  -3 -4.0351 6.40937   5
   0  -5  -3 -5.2489 15.3141   3
   0   5  -3 6.94094 12.6508   5
  -5   0  -3 -13.601 10.1838   2
   5   0  -3 7.96499 6.22769   2
   0   5  -3 -14.139 15.9787   2
  -5   0   3 -10.730 8.07059   2
   0   5  -3 1.91502 17.4036   1
  -5   0  -3 -8.9548 12.0043   4
   5   0   3 -3.8697 10.8461   2
  -5   0   3 -13.274 11.1045   4
  -5   0  -3 2.92657 7.43815   3
   0   5   3 -9.2544 11.5116   1
   0  -5  -3 15.9786 13.6305   2
   0   5   3 -1.4214 12.5382   2
   0  -5  -3 -4.2370 8.44811   4
   5   0   3 9.68220 8.96684   3
  -5   0   3 6.22753 7.40407   2
   0  -5   3 -9.5900 15.0590   2
   0  -5   3 7.30840 14.4071   3
  -5   0  -3 -1.6886 4.54912   5
   5   2   3 59.0572 13.8553   2
   2   5  -3 66.9683 20.1615   1
  -2  -5  -3 41.6184 19.0391   3
  -2   5   3 74.1717 14.9494   2
  -5   2  -3 36.9192 15.2990   2
   5  -2  -3 57.4037 15.4770   4
   2  -5   3 42.9768 12.4749   3
   2   5  -3 56.5391 15.3390   5
  -5   2  -3 60.5637 16.8588   2
  -5  -2   3 71.0708 10.6933   5
  -2   5   3 59.4603 13.9910   2
   5   2   3 31.2206 6.93052   5
   2   5  -3 23.0647 15.8949   2
  -2  -5  -3 62.2658 17.4628   2
   2  -5   3 30.1147 15.1055   2
  -5   2  -3 67.1049 8.06449   3
  -2   5   3 62.3939 15.3697   1
  -5  -2   3 39.9116 15.4877   3
  -2   5   3 30.0611 13.1889   4
  -5  -2   3 52.1154 12.6796   2
  -5  -2   3 46.5660 13.4495   4
   2  -5   3 24.6103 15.3996   4
  -5  -2   3 69.7422 15.0269   2
   5   2   3 56.2269 14.8021   4
  -5  -2  -3 69.3449 16.0902   2
  -5   2   3 56.9906 7.96142   2
  -2   5  -3 65.7920 14.5652   2
   2  -5  -3 53.1092 13.7932   4
  -5   2   3 64.3232 7.29408   2
   2   5   3 39.2646 15.2922   5
   2   5   3 84.9108 18.1125   2
  -5  -2  -3 74.2905 11.9027   5
   5  -2   3 38.4702 15.4347   4
  -5  -2  -3 52.9881 14.0627   4
  -2   5  -3 67.8935 12.3505   5
  -2   5  -3 47.4265 19.2685   1
  -2  -5   3 62.3934 16.6390   2
  -2  -5   3 60.7275 15.1949   3
   2  -5  -3 49.2986 14.1311   2
  -5  -2  -3 54.2825 11.9825   3
   5   2  -3 63.0792 14.0451   2
   5   4   3 141.954 22.1528   2
  -5   4  -3 119.663 20.8555   1
   4  -5   3 123.185 18.9708   4
   4   5  -3 129.302 20.6522   2
  -5   4  -3 141.825 16.7393   2
  -5  -4   3 107.139 16.8874   4
  -4  -5  -3 140.850 20.2794   3
  -4   5   3 118.529 14.8280   2
   4  -5   3 170.786 18.4631   2
   5  -4  -3 93.4854 21.2398   4
  -5  -4   3 132.181 21.6221   3
  -4   5   3 102.678 18.8204   1
   5  -4  -3 120.545 9.39222   2
  -5  -4   3 123.379 19.4195   2
   5   4   3 145.824 16.5914   5
   4   5  -3 133.971 16.4468   5
  -5   4  -3 118.308 16.1456   2
  -5   4  -3 110.804 11.4903   3
  -4  -5  -3 151.424 24.3198   2
  -4   5   3 124.124 15.3191   2
  -4  -5  -3 134.426 15.2432   4
  -4   5  -3 128.910 21.8516   1
  -5  -4  -3 143.825 19.0920   3
   4   5   3 131.998 18.5168   5
  -4  -5   3 100.556 19.6677   2
   5   4  -3 110.674 13.9012   5
   4   5   3 139.323 21.7980   2
  -4   5  -3 131.712 16.9982   2
  -5  -4  -3 124.151 21.8540   2
   5  -4   3 131.299 20.1496   4
  -4   5  -3 135.430 17.0263   2
  -5   4   3 117.987 17.1664   1
  -5   4   3 128.964 13.1876   2
  -4   5  -3 172.199 15.8940   3
   5   4  -3 115.690 18.5310   2
   4  -5  -3 136.601 21.0678   4
  -4   5  -3 112.568 14.1041   5
  -5   4   3 117.858 13.4331   2
  -5  -4  -3 150.535 17.3800   4
  -4  -5   3 141.612 20.0554   3
  -6  -1   3 44.3774 5.70036   5
   1  -6   3 40.2916 14.3866   2
   1  -6   3 18.1229 14.8246   3
  -1  -6  -3 17.3536 14.4066   3
  -6   1  -3 30.0251 7.30607   3
   1   6  -3 26.3368 15.9456   1
  -6  -1   3 46.1417 13.7731   3
  -1   6   3 18.9293 13.6239   2
  -6  -1   3 42.5593 10.8291   2
   1   6  -3 27.6253 15.7636   5
  -1   6   3 38.9105 14.6849   1
  -6  -1   3 37.4926 11.0267   2
  -6   1  -3 35.7374 12.3862   2
   6   1   3 31.5348 14.2341   4
   6  -1  -3 27.4642 18.1358   4
  -6   1  -3 42.5968 12.6304   2
   1   6  -3 37.9344 16.9807   2
  -1  -6  -3 34.0886 19.4137   2
   6   1   3 56.7296 15.0797   2
  -6  -1  -3 7.27256 10.2519   3
   1  -6  -3 46.2766 17.1817   3
   1   6   3 15.1147 14.3038   5
  -6  -1  -3 46.8881 9.55150   5
  -6   1   3 40.4664 7.64018   2
  -6   1   3 41.7176 7.17943   2
  -1  -6   3 8.40261 13.9386   3
  -1   6  -3 50.1613 12.3621   5
  -1  -6   3 39.9115 16.1050   2
  -1   6  -3 52.4358 18.0216   1
  -6   1   3 33.5268 10.9636   3
  -6  -1  -3 27.6814 12.9418   2
   1   6   3 24.6486 15.7889   2
  -1   6  -3 17.3537 13.7797   2
  -6  -1  -3 51.8654 13.5288   2
   6   1  -3 33.9152 14.8692   4
   1  -6  -3 39.6333 11.8902   4
   1  -6  -3 27.8435 13.8489   2
   6   1  -3 44.3595 9.14823   2
   1   6   3 39.0918 15.3908   1
   6  -1   3 32.4968 18.1623   4
   6   3   3 23.5474 8.77544   5
   6   3   3 36.9859 14.3644   4
   3   6  -3 29.7709 16.7629   1
  -3  -6  -3 30.2471 17.3435   2
   3   6  -3 29.5205 12.7593   5
  -6   3  -3 17.1435 13.1281   2
  -6  -3   3 18.9587 15.1027   3
   6  -3  -3 39.4573 17.7961   4
  -6  -3   3 12.2994 14.7951   2
   3   6  -3 -1.1917 18.7925   2
   3  -6   3 37.5668 13.5038   3
  -3   6   3 2.99423 12.5145   2
   6   3   3 41.6208 16.4221   2
  -6   3  -3 29.9554 6.86671   3
  -6   3  -3 23.4914 14.4189   2
  -6  -3   3 19.1366 9.98469   5
  -6   3  -3 13.3849 15.6850   1
   3  -6   3 28.5314 11.9280   2
  -3   6   3 -8.2994 14.6950   1
  -3   6   3 28.8107 12.6011   2
  -3  -6  -3 18.1616 17.5080   3
   3  -6   3 14.5554 13.3662   4
   6  -3   3 3.83574 7.72371   2
  -6  -3  -3 20.8674 14.1554   3
  -3   6  -3 6.97678 10.3384   5
  -3   6  -3 28.2051 22.6610   1
  -6   3   3 15.3711 6.77396   2
   6  -3   3 17.4321 14.6278   4
  -6   3   3 20.5223 5.69545   2
   3   6   3 42.4404 20.2448   2
  -6  -3  -3 6.27078 12.7015   4
   3  -6  -3 44.0546 12.9296   2
   3   6   3 21.3300 12.7544   5
   6   3  -3 27.0725 5.45920   5
   6   3  -3 23.2226 14.0450   2
  -3  -6   3 1.10511 18.8025   2
   3  -6  -3 22.3128 13.8268   4
  -6  -3  -3 14.0061 12.9031   2
  -3   6  -3 36.1983 15.3515   2
  -3  -6   3 30.8525 18.1364   3
  -6  -5   3 92.5697 21.1369   2
  -6   5  -3 92.1135 19.9552   1
  -6   5  -3 84.5170 14.9068   2
  -6   5  -3 67.8214 7.91772   5
  -6  -5   3 88.9601 20.4067   3
   5   6  -3 84.0844 15.8944   5
   5  -6   3 100.764 19.0568   4
  -5   6   3 85.2547 14.1843   2
   5   6  -3 93.9714 22.6031   2
  -5  -6  -3 108.960 21.9154   3
  -6   5  -3 93.8326 11.6466   3
  -6   5  -3 94.6397 14.2460   2
   5  -6   3 89.2015 14.7830   2
   6   5   3 81.4614 18.4962   2
  -5  -6  -3 99.9197 23.2981   2
  -5   6   3 85.4161 19.0431   1
   6  -5  -3 66.6140 18.3722   4
  -5  -6  -3 86.2714 12.8091   4
   6   5   3 101.181 15.3688   5
   5   6   3 130.287 24.0911   2
  -6  -5  -3 94.2226 15.2334   4
  -5   6  -3 91.0944 12.4387   5
  -6  -5  -3 65.4153 17.0311   3
  -5   6  -3 113.979 24.2960   1
  -6  -5  -3 66.4119 18.4267   2
   5   6   3 79.4454 15.2300   5
  -6   5   3 98.0367 12.3370   2
   6  -5   3 116.460 20.1648   4
  -5  -6   3 95.3776 19.9067   2
  -5   6  -3 93.2109 15.6297   2
  -6   5   3 94.0351 11.7272   2
  -5   6  -3 101.601 16.1859   2
   6   5  -3 91.0819 13.7462   5
  -6   5   3 109.610 20.2386   1
   5  -6  -3 104.137 20.5557   4
   6   5  -3 87.2787 18.0465   2
  -5  -6   3 68.8045 20.2320   3
  -7   0  -3 -21.096 9.35001   2
  -7   0  -3 -5.2299 10.3516   2
   0   7   3 5.70136 14.1877   2
  -7   0   3 -7.6853 7.60260   2
  -7   0   3 -0.0683 9.30567   3
   0  -7  -3 2.47615 8.67857   4
   0   7  -3 9.06672 14.7146   5
  -7   0  -3 10.7820 7.47086   5
   0   7   3 13.9707 14.4165   1
   0   7  -3 17.3566 18.5042   1
  -7   0  -3 -0.0095 7.97137   3
   7   0   3 5.99260 16.4324   4
   0  -7   3 1.30925 13.0371   3
   0   7  -3 3.91177 14.1161   2
   7   0  -3 1.27795 8.33598   2
  -7   0  -3 -4.4215 4.91690   5
   7   0   3 -6.5903 11.6807   2
   0  -7  -3 15.3161 17.2307   2
  -7   0   3 0.81149 8.61746   2
   0   7   3 4.43360 11.3271   5
   0  -7  -3 11.4538 13.8807   3
   0  -7   3 7.10917 17.4351   2
   7   0  -3 -4.3818 13.8266   4
   7   2   3 55.6118 17.5676   4
  -7  -2   3 94.6722 17.3692   2
  -2  -7  -3 65.0046 21.9598   2
  -2  -7  -3 39.0664 16.6609   3
   2   7  -3 49.6261 17.9242   1
  -2   7   3 78.0037 17.7711   1
   7   2   3 77.8976 16.3238   2
   2  -7   3 100.440 16.8765   3
   7  -2  -3 72.5999 18.5724   4
   2  -7   3 62.0791 16.6343   4
   2   7  -3 61.7020 17.6297   5
   2   7  -3 55.9355 19.0346   2
  -7   2  -3 64.0836 14.0829   2
  -7   2  -3 86.8943 17.1498   2
  -7  -2   3 47.5124 15.6737   3
   2  -7   3 69.5861 16.3095   2
  -7  -2   3 118.560 16.3364   2
  -2   7   3 52.8424 17.2262   2
  -7  -2   3 76.8009 10.7099   5
  -7   2  -3 64.0004 8.29146   3
   7  -2   3 73.4982 11.1035   2
   2  -7  -3 71.4424 15.6741   3
   7   2  -3 80.6145 17.2374   4
  -7  -2  -3 57.2753 15.2660   3
  -7   2   3 72.2912 12.4759   3
  -2  -7   3 69.2198 19.4547   2
  -2   7  -3 73.4517 15.3462   5
   2  -7  -3 61.8997 17.2383   2
  -7   2   3 69.0616 8.08302   2
  -7   2   3 84.4979 11.1966   2
   2   7   3 81.0140 16.5671   1
   7  -2   3 66.2118 20.9289   4
   7   2  -3 49.8287 13.1395   2
  -7  -2  -3 84.3610 12.6943   5
  -2   7  -3 97.2032 20.1752   2
   2   7   3 85.1054 16.0237   5
   2  -7  -3 85.9439 15.0431   4
  -2   7  -3 107.933 24.7719   1
   2   7   3 98.0843 20.5816   2
  -7  -2  -3 60.3847 16.0061   2
  -2  -7   3 59.6530 17.0790   3
  -7   4  -3 -3.8540 10.4585   2
  -7  -4   3 3.38999 15.6165   2
  -4   7   3 10.9928 12.0745   2
  -4   7   3 -27.665 12.1283   2
  -4  -7  -3 1.96227 7.23801   4
  -4  -7  -3 -14.403 13.4862   3
   4   7  -3 11.0650 14.3159   5
   7   4   3 16.6026 8.54671   5
  -4  -7  -3 -13.712 14.9087   2
   4  -7   3 -11.166 15.5741   4
   7  -4  -3 -22.931 13.7905   4
  -7   4  -3 10.3698 12.3724   2
   4  -7   3 -3.9333 11.7677   2
  -7  -4   3 2.17460 15.8668   3
  -4   7   3 -7.2276 15.0357   1
  -7   4  -3 -3.4839 5.35888   3
  -7   4  -3 -8.8253 14.0697   1
   7   4   3 4.47949 15.5503   2
   4   7  -3 0.09255 15.8964   2
  -4  -7   3 -0.1293 18.7922   2
   4   7   3 -27.300 13.0375   5
  -4   7  -3 -3.5025 9.38032   5
   7  -4   3 8.57769 14.9641   4
  -7  -4  -3 -1.8529 15.9980   2
   4   7   3 -14.116 18.5792   2
   4  -7  -3 -6.2979 11.5874   4
  -4   7  -3 -12.217 13.0769   2
   7   4  -3 4.11747 4.83128   5
  -7   4   3 9.58067 6.94308   2
  -7   4   3 12.9487 14.8104   1
   7   4  -3 -3.5500 14.8242   2
  -7  -4  -3 12.8396 14.8841   3
  -4  -7   3 -9.5616 14.1056   3
   4  -7  -3 12.7960 10.6774   2
  -4   7  -3 3.55512 17.1635   1
  -7   4   3 -7.7745 5.27628   2
  -7   6  -3 73.1288 21.2733   1
  -6  -7  -3 108.281 21.6128   2
  -6   7   3 59.8840 14.0883   2
   6  -7   3 70.7578 13.6803   2
  -7  -6   3 78.2612 21.2003   3
  -7   6  -3 87.9978 13.1622   3
  -6   7   3 98.9439 14.2012   2
  -6  -7  -3 78.9390 13.5663   4
   6  -7   3 68.0142 21.5607   4
   6   7  -3 64.3289 15.7396   5
  -6  -7  -3 71.4218 19.2355   3
   6   7  -3 77.0084 20.0356   2
  -6   7   3 69.0251 20.2645   1
   7  -6  -3 62.9262 20.9863   4
   7   6   3 78.9539 14.8993   5
   7   6   3 69.1434 21.2263   2
  -7   6  -3 58.5461 8.93414   5
  -7   6  -3 63.4795 14.4018   2
  -7  -6   3 92.4050 22.5965   2
  -7   6  -3 73.0577 15.1696   2
   6  -7  -3 80.5542 21.2989   4
   7   6  -3 99.7991 19.8281   2
  -7  -6  -3 70.7997 21.9519   2
  -6  -7   3 71.0244 22.9214   2
  -6   7  -3 72.7575 11.8055   5
   6   7   3 65.2176 16.9122   5
  -6   7  -3 70.8301 21.9523   1
   7  -6   3 62.5385 22.0482   4
   7   6  -3 68.9629 13.9132   5
  -7  -6  -3 67.1434 17.2991   3
  -7   6   3 72.7463 12.0779   2
  -7   6   3 64.9981 19.9583   1
  -7   6   3 81.2194 12.3417   2
   6   7   3 65.5543 19.5584   2
  -6   7  -3 76.3959 17.4016   2
   6  -7  -3 62.8462 10.8377   2
  -6   7  -3 55.6325 14.7386   2
  -6  -7   3 82.3317 19.4047   3
   8   1   3 19.2376 16.9263   4
   1  -8   3 39.9444 16.4457   2
   1   8  -3 48.6527 17.3001   5
  -8   1  -3 44.8353 11.8501   2
  -8  -1   3 44.9568 6.94175   5
  -8   1  -3 47.9986 12.2760   2
  -1  -8  -3 47.6038 17.4150   2
  -8  -1   3 58.4775 12.3921   2
  -8  -1   3 32.8645 13.9666   3
  -8   1  -3 47.5321 5.59628   5
  -8   1  -3 56.5014 9.76674   3
   1  -8   3 40.3536 15.7481   4
   1   8  -3 40.2666 17.6801   2
   1   8  -3 18.7194 20.6508   1
  -1   8   3 42.5425 12.6723   5
  -1   8   3 58.1553 19.6813   2
  -1  -8  -3 41.6973 10.1022   4
  -8  -1   3 41.8914 12.1341   2
  -1   8   3 39.1429 16.3786   1
   1  -8   3 79.9706 18.2829   3
   8  -1  -3 43.0489 17.1100   4
   8   1   3 21.2058 14.1033   2
  -1  -8  -3 32.0643 16.5074   3
  -8   1  -3 41.2938 6.07141   5
   8   1  -3 59.5649 20.4510   4
   1   8   3 54.8925 18.2525   2
  -8   1   3 49.9919 9.44338   2
  -1   8  -3 17.9653 20.3924   1
  -1   8  -3 50.8245 16.6533   2
  -8  -1  -3 61.4538 16.5199   2
   1   8   3 39.7884 16.8489   5
  -8   1   3 52.9156 9.64332   2
  -8   1   3 66.3503 12.7640   3
   1   8   3 44.8000 14.7483   1
  -1   8  -3 64.1214 16.4089   5
  -8  -1  -3 52.7096 10.1145   5
   8  -1   3 1.32977 8.80084   2
  -1  -8   3 33.0032 15.9473   3
   8  -1   3 56.1871 17.9970   4
  -1  -8   3 23.7236 19.7391   2
   1  -8  -3 34.5713 15.5480   3
   1  -8  -3 67.4814 17.1758   2
  -8  -1  -3 61.7025 13.1833   3
   1  -8  -3 49.3715 13.1887   4
  -8  -1  -3 34.1696 13.4475   2
   8   3   3 215.684 25.5954   2
  -3   8   3 225.454 26.1443   2
   8   3   3 216.843 25.7849   4
  -3  -8  -3 155.825 23.5638   3
  -8  -3   3 133.775 19.6367   3
   3  -8   3 166.048 22.3191   4
  -8  -3   3 174.309 22.2409   2
  -8   3  -3 154.681 20.6806   2
  -3  -8  -3 149.916 25.4263   2
   3   8  -3 201.725 26.2432   1
   3   8  -3 194.234 24.0689   5
  -8   3  -3 206.762 13.2215   3
   3  -8   3 195.424 26.2317   2
   3  -8   3 163.786 20.9175   3
  -8  -3   3 191.803 18.1493   5
   8  -3  -3 256.733 29.0720   4
  -8   3  -3 215.298 23.2400   2
  -3   8   3 197.287 24.7926   1
  -8   3  -3 145.871 24.1546   1
   3   8  -3 210.437 27.4268   2
  -3   8  -3 169.874 29.4678   1
  -8  -3  -3 177.799 21.4547   3
   3  -8  -3 204.800 25.0682   2
   8   3  -3 182.490 24.5175   2
  -8   3   3 182.263 15.1216   2
   8  -3   3 191.227 25.0656   4
   8  -3   3 203.868 14.9760   2
   3   8   3 142.818 22.6280   5
   3  -8  -3 187.909 23.2626   4
  -3  -8   3 210.441 27.1139   3
  -3  -8   3 142.765 24.6504   2
   3   8   3 175.281 25.6586   2
  -3   8  -3 181.077 21.8641   5
  -8  -3  -3 233.433 24.5177   2
  -8   3   3 193.044 17.7565   3
  -3   8  -3 166.467 22.1058   2
  -8   3   3 191.844 13.1453   2
  -5   8   3 23.8094 16.0467   1
  -8   5  -3 24.4990 17.3745   1
  -8   5  -3 35.7275 6.98008   3
   5  -8   3 26.5384 17.6423   4
   8  -5  -3 27.3288 17.4550   4
   8   5   3 46.8481 18.7757   2
  -8  -5   3 29.3501 15.4938   2
  -5  -8  -3 37.6620 20.8332   3
   5   8  -3 58.8263 16.7198   5
  -5  -8  -3 41.3155 18.5169   2
  -8   5  -3 21.3502 11.2154   2
  -5   8   3 24.2411 13.2138   2
   5   8  -3 16.3216 17.2770   2
  -8   5  -3 25.8574 12.8734   2
   8   5   3 25.8299 9.56210   5
  -8  -5   3 35.2966 18.2141   3
  -5  -8  -3 49.2086 10.4627   4
   5  -8   3 35.1257 13.4780   2
  -8  -5  -3 31.9669 18.8686   2
   5  -8  -3 36.4255 12.6875   2
   5   8   3 36.8319 16.5536   5
   8  -5   3 15.2268 8.33326   2
  -5  -8   3 39.7009 18.1059   3
   5  -8  -3 19.9914 17.4061   4
  -8  -5  -3 19.6177 16.8268   3
   8   5  -3 10.8722 4.64752   5
  -5   8  -3 14.1778 23.7578   1
  -5   8  -3 9.30098 12.0755   5
  -8   5   3 31.3264 14.9319   1
  -8   5   3 14.3337 7.12787   2
  -8   5   3 27.5495 8.43302   2
  -5   8  -3 21.2110 14.6038   2
   5   8   3 -19.029 15.2382   2
   8   5  -3 19.9179 16.2687   2
  -5  -8   3 11.5403 17.2303   2
   8  -5   3 13.6026 16.3135   4
  -8  -7   3 37.7748 21.0150   2
  -8  -7   3 30.1023 17.2301   3
  -8   7  -3 56.1378 10.3870   5
  -7   8   3 44.4927 14.0697   2
  -7   8   3 43.3659 21.7400   1
  -7  -8  -3 50.7790 22.3982   3
  -7  -8  -3 4.18860 21.4714   2
   7  -8   3 86.4959 23.3720   4
   8  -7  -3 66.3239 22.0548   4
  -8   7  -3 74.4130 24.6410   1
  -7  -8  -3 46.8755 12.0170   4
   7   8  -3 48.4625 19.6437   2
   8   7   3 60.9572 22.2354   2
  -8   7  -3 60.7276 15.2248   2
  -7   8   3 70.0866 17.1111   2
   8   7   3 70.1870 14.6958   5
  -8   7  -3 64.1299 19.4035   2
   7   8  -3 52.6039 15.5755   5
   8  -7   3 78.2922 12.0380   2
  -8  -7  -3 54.9894 19.8806   2
  -7   8  -3 52.4513 26.0486   1
  -8   7   3 45.1025 11.8490   2
  -7  -8   3 60.4732 23.5609   2
  -8   7   3 32.7079 21.1164   1
  -7   8  -3 72.5971 12.5561   5
   7   8   3 50.4465 16.1831   5
  -8  -7  -3 88.5757 23.0988   3
   7  -8  -3 83.3054 20.3083   4
  -7   8  -3 37.2386 16.4988   2
  -8   7   3 51.5972 11.4427   2
   7  -8  -3 55.4197 10.2926   2
   7   8   3 52.9799 20.5515   2
  -7  -8   3 53.5732 20.3614   3
   8   7  -3 62.9588 13.9000   5
   8  -7   3 76.3660 21.5349   4
   8   7  -3 61.3298 22.1245   2
  -9   0   3 1.05694 9.28154   2
   0   9   3 -7.3524 11.4390   5
   0  -9  -3 -4.7452 9.08946   4
   0  -9  -3 -23.259 16.2231   3
   9   0  -3 -2.0415 9.16150   2
  -9   0   3 -1.9099 8.84319   2
   0   9   3 -23.172 12.9949   2
   9   0  -3 1.44684 15.5886   4
   9   0   3 20.3020 8.75751   2
   0  -9  -3 -11.090 13.8487   2
   0   9  -3 15.2716 18.6894   2
   0   9  -3 0.55867 12.3150   5
   0   9  -3 -0.3524 15.0776   1
  -9   0  -3 3.53251 11.7754   2
   9   0   3 10.0330 14.7588   4
  -9   0  -3 -4.6454 10.9914   2
  -9   0  -3 -11.935 8.03392   3
  -9   0  -3 -0.8878 8.07022   5
   0  -9   3 0.29692 16.6536   3
  -9   0   3 -6.7712 10.4546   3
   0   9   3 -9.3471 14.9290   1
   0  -9   3 19.3385 15.8612   2
  -9   0  -3 -4.4780 5.61718   5
  -2   9   3 57.1897 18.0082   1
  -2  -9  -3 24.5825 21.3213   2
   2  -9   3 88.9815 18.8394   4
   2  -9   3 100.832 21.1039   2
   2  -9   3 49.2273 17.3032   3
   9   2   3 59.9931 15.1723   2
  -9   2  -3 50.7524 14.7137   2
  -2   9   3 69.3304 15.9265   5
  -9  -2   3 57.3913 10.5571   5
  -9   2  -3 64.9554 9.44047   3
   9  -2  -3 69.5996 20.1358   4
  -9  -2   3 99.4737 15.9946   2
   2   9  -3 60.7885 19.3004   5
  -9  -2   3 52.1706 16.3748   2
  -9   2  -3 57.8404 4.99677   5
  -2   9   3 57.3681 19.6438   2
   9   2   3 48.7378 16.6834   4
   2   9  -3 126.457 25.1644   2
  -2  -9  -3 49.7429 10.2952   4
  -2  -9  -3 62.2276 18.8735   3
   2   9  -3 90.9664 23.3978   1
  -9  -2   3 68.7851 16.0990   3
  -9   2  -3 70.3984 13.2996   2
  -9   2   3 56.6068 9.73342   2
   2  -9  -3 71.3157 17.0242   2
   2  -9  -3 38.5079 15.8296   3
  -2  -9   3 61.8722 20.1156   2
  -2  -9   3 63.5180 18.6018   3
   2   9   3 41.7510 15.9283   5
   2   9   3 50.3081 19.0787   2
   9   2  -3 50.7720 13.8516   2
   2   9   3 93.7514 20.7902   1
  -2   9  -3 78.9811 23.1351   1
   9   2  -3 57.6775 20.5142   4
   2  -9  -3 50.6902 15.2917   4
  -9  -2  -3 54.5230 12.9537   5
  -9  -2  -3 51.7851 13.8146   3
  -9   2   3 59.0045 8.71883   2
   9  -2   3 53.0904 10.1862   2
  -2   9  -3 40.7403 16.0372   5
  -9   2   3 56.7797 12.0638   3
  -9  -2  -3 39.7977 15.5089   2
  -2   9  -3 29.0658 15.9727   2
   9  -2   3 66.2369 18.8502   4
   4   9  -3 20.6575 17.1258   5
  -9  -4   3 17.5573 16.1890   3
   4   9  -3 -1.4361 17.0667   2
   4  -9   3 29.7703 15.6307   2
  -4  -9  -3 19.1479 21.5253   2
  -9  -4   3 10.1813 15.6845   2
   9   4   3 34.6681 16.5941   2
  -4   9   3 23.7157 11.6847   5
   4  -9   3 9.38863 16.6948   4
  -9   4  -3 21.3666 13.5556   2
  -4   9   3 16.5754 14.8860   2
  -9   4  -3 24.7072 12.7255   2
   4   9  -3 48.2108 19.9568   1
   9  -4  -3 47.4329 21.5716   4
  -4   9   3 31.6278 18.9044   1
  -9   4  -3 57.2897 18.5739   1
  -9   4  -3 37.5446 6.69421   3
   9   4   3 19.5454 15.4866   4
  -4  -9  -3 25.8337 17.7900   3
  -4   9  -3 52.5046 17.7545   2
  -4  -9   3 13.7744 17.9557   2
  -4  -9   3 34.5707 17.2620   3
  -9   4   3 19.8070 9.80925   3
  -4   9  -3 18.6746 23.0006   1
   4  -9  -3 6.91298 13.1729   2
   4   9   3 36.2232 17.9634   5
  -9   4   3 30.5501 7.51748   2
   9  -4   3 69.1048 18.6037   4
  -9   4   3 21.8698 6.96457   2
  -9  -4  -3 36.8458 16.0712   3
   4   9   3 36.6938 23.1219   2
   9   4  -3 36.1835 16.4775   2
  -4   9  -3 18.8481 12.6676   5
   4  -9  -3 43.5638 16.8425   4
  -9  -4  -3 2.27969 16.3522   2
  -9   6  -3 -9.3719 9.98190   2
  -9   6  -3 21.0674 24.0687   2
  -9   6  -3 7.28149 5.50824   5
   6  -9   3 21.0123 18.8955   4
  -6  -9  -3 10.1016 9.35438   4
  -9   6  -3 9.90057 21.7972   1
   6  -9   3 34.1014 13.8366   2
   9   6   3 -41.090 15.2368   2
  -9  -6   3 31.9992 19.1526   2
  -6   9   3 1.56560 12.1681   2
  -9  -6   3 6.80470 16.8717   3
  -6  -9  -3 12.3290 17.2078   3
  -6   9   3 -0.0237 18.9102   1
   9   6   3 5.49421 8.59386   5
   6   9  -3 19.5393 21.6047   2
   6   9  -3 10.3921 14.9340   5
   9  -6  -3 -8.4364 20.0918   4
  -6  -9  -3 -21.751 20.5412   2
  -9  -6  -3 8.13395 14.7069   2
  -6   9  -3 -13.131 11.1297   5
   9   6  -3 4.51545 16.8795   2
   6  -9  -3 21.6513 17.8857   4
  -9   6   3 -0.9921 7.47668   2
   6   9   3 -11.312 11.0106   5
  -9   6   3 -4.2967 18.2103   1
   9  -6   3 5.25152 20.6101   4
   6   9   3 16.8615 18.7362   2
  -6   9  -3 19.4367 21.0967   1
  -6  -9   3 20.1671 17.3962   2
  -9  -6  -3 -14.012 15.3348   3
  -6  -9   3 23.5576 17.7402   3
   6  -9  -3 -0.0457 9.95609   2
  -6   9  -3 -12.394 14.9204   2
  -9   6   3 -8.7501 8.65621   2
  -9   8  -3 115.860 30.4771   1
  -9  -8   3 104.912 25.7707   3
   8   9  -3 114.824 18.5500   5
  -8   9   3 99.2514 17.5549   2
  -8  -9  -3 125.844 27.9860   3
   9  -8  -3 98.4440 23.6009   4
  -8   9   3 113.717 27.7224   1
  -8  -9  -3 126.775 26.0013   2
   9   8   3 136.999 27.7518   2
  -9  -8   3 123.131 27.1233   2
  -9   8  -3 114.644 14.4149   5
  -9   8  -3 139.009 19.6258   2
   9   8   3 139.907 18.3373   5
   8   9  -3 79.6135 23.5004   2
   8  -9   3 119.619 26.7568   4
   9   8  -3 130.963 26.1176   2
   8  -9  -3 140.907 27.6357   4
  -9  -8  -3 152.112 29.7417   2
   8   9   3 94.3074 24.2995   2
  -8  -9   3 45.7896 21.1951   2
  -9   8   3 106.134 15.5768   2
  -8   9  -3 136.119 31.7476   1
  -8   9  -3 108.151 20.3598   2
  -9  -8  -3 150.737 26.4691   3
   9  -8   3 167.575 29.9371   4
  -9   8   3 89.5880 26.8270   1
  -8  -9   3 109.438 23.6943   3
  -8   9  -3 121.117 17.3653   5
   8   9   3 94.3036 19.1542   5
  -1  10   3 13.7157 15.2683   5
  -1  10   3 6.25860 14.1904   2
  10   1   3 10.6711 13.0234   2
   1 -10   3 -10.944 11.8529   4
  10  -1  -3 20.0647 17.3878   4
  -1 -10  -3 -3.8850 9.13169   4
  -1 -10  -3 7.48808 19.2845   3
   1  10  -3 35.3946 20.6376   1
 -10   1  -3 2.36806 5.17141   5
  -1 -10  -3 -4.1155 18.9589   2
 -10  -1   3 -6.9687 9.82076   2
 -10   1  -3 8.97625 11.9434   2
 -10   1  -3 -1.6839 6.52857   5
 -10   1  -3 -10.269 10.3381   2
 -10  -1   3 11.5063 11.5789   2
  -1  10   3 -16.260 15.0264   1
   1 -10   3 1.86035 17.4089   2
 -10  -1   3 -23.285 9.85074   3
 -10  -1   3 -7.0510 5.50628   5
 -10   1  -3 3.81443 7.54804   3
   1  10  -3 4.39412 13.6170   5
   1  10  -3 -2.1527 18.8708   2
   1 -10   3 16.7927 16.2398   3
  10   1   3 27.5594 19.0448   4
  10   1  -3 -9.3632 19.0204   4
   1  10   3 5.01983 20.0977   2
  -1 -10   3 39.7045 21.2329   2
 -10   1   3 5.53229 8.93706   2
   1 -10  -3 -15.980 13.3710   3
  -1  10  -3 -18.036 14.0899   2
  -1  10  -3 -3.9103 19.9898   1
 -10  -1  -3 13.8022 12.8227   2
 -10  -1  -3 -10.204 12.2002   2
   1  10   3 4.74960 13.1384   5
  -1 -10   3 20.8533 18.4251   3
 -10  -1  -3 0.26140 7.98170   5
  10   1  -3 3.50874 10.1520   2
  10  -1   3 11.7925 16.2065   4
  10  -1   3 10.0485 9.99436   2
   1  10   3 -4.1068 16.1063   1
  -1  10  -3 -19.082 14.3377   5
   1 -10  -3 -7.1644 17.3315   2
   1 -10  -3 -12.001 10.6543   4
 -10   1   3 -5.1477 7.63416   2
 -10  -1  -3 19.3830 11.5542   3
 -10   1   3 -6.5007 9.80827   3
 -10  -3   3 0.94521 14.1758   3
  -3 -10  -3 12.5742 19.9057   3
 -10  -3   3 -0.7617 14.1398   2
  -3  10   3 -3.3723 12.9021   5
  10  -3  -3 1.16763 20.1052   4
  10   3   3 13.3520 16.5654   4
  -3  10   3 4.88936 16.8919   1
   3 -10   3 1.34359 15.1433   4
   3 -10   3 -14.164 12.6082   2
   3  10  -3 -7.6234 16.8435   2
   3  10  -3 -26.336 15.6427   5
   3 -10   3 -4.5360 14.0895   3
  -3 -10  -3 18.1324 17.8230   2
 -10   3  -3 5.86417 6.41064   3
  10   3   3 12.5998 15.9813   2
 -10   3  -3 12.2160 16.4392   2
  -3  10   3 -1.1903 16.6820   2
   3  10  -3 -11.444 20.4376   1
 -10   3  -3 -6.0924 9.00237   2
  10   3  -3 5.79506 10.9818   2
  -3 -10   3 31.5664 18.6657   2
 -10   3   3 -15.091 8.05161   2
 -10   3   3 1.89150 8.79584   3
  -3 -10   3 21.7684 21.3997   3
   3 -10  -3 1.06066 14.8044   4
 -10  -3  -3 3.03648 14.8568   2
 -10   3   3 4.34048 6.01179   2
   3  10   3 24.0130 17.5966   5
  -3  10  -3 -7.0314 21.0062   1
  -3  10  -3 -18.303 16.5381   2
   3  10   3 14.7133 18.5680   2
  -3  10  -3 9.33096 14.5085   5
   3 -10  -3 -3.7740 14.2923   2
  10  -3   3 -1.0692 19.2826   4
 -10  -3  -3 8.06125 13.1276   3
  -5  10   3 72.9747 17.9972   2
   5  10  -3 59.0130 19.1274   5
   5  10  -3 45.4692 24.1732   2
 -10   5  -3 49.4527 20.9873   1
  10   5   3 94.8500 20.9489   2
 -10  -5   3 100.954 22.0421   2
   5 -10   3 72.5659 21.1107   4
  -5  10   3 58.7854 14.2511   5
 -10   5  -3 47.5790 13.3149   2
  -5 -10  -3 56.3684 25.1581   2
  10  -5  -3 28.4167 19.4964   4
  -5  10   3 48.2058 22.0933   1
 -10   5  -3 72.6057 8.55508   3
  -5 -10  -3 96.4432 21.4508   3
   5 -10   3 42.1918 16.7784   2
 -10  -5   3 88.7547 19.0478   3
  10  -5   3 29.2705 22.5885   4
 -10   5   3 65.0043 9.06810   2
  -5  10  -3 54.9736 15.3549   5
  -5 -10   3 37.5750 24.0009   3
  -5 -10   3 67.2643 23.0740   2
  -5  10  -3 100.733 20.9606   2
   5 -10  -3 63.8937 19.7736   4
 -10   5   3 65.1505 12.6923   3
   5  10   3 59.2078 21.9320   2
 -10   5   3 59.7727 21.5175   1
 -10   5   3 45.6860 9.42313   2
   5  10   3 57.4657 17.4276   5
  -5  10  -3 71.0979 27.6205   1
 -10  -5  -3 58.0599 20.4769   2
   5 -10  -3 72.1321 15.8957   2
 -10  -5  -3 93.9786 20.9345   3
  10   5  -3 134.646 20.7615   2
  10  -7  -3 10.9921 23.0777   4
 -10   7  -3 2.88863 7.56113   5
  10   7   3 -0.1708 18.7582   2
 -10  -7   3 18.6186 19.8039   3
 -10   7  -3 32.3757 20.6869   1
  -7  10   3 -3.3079 10.4947   5
  -7 -10  -3 32.8599 20.8395   2
   7  10  -3 9.07985 15.8417   5
  -7 -10  -3 6.23399 16.9321   3
   7 -10   3 9.80417 16.3718   4
  -7  10   3 6.68480 12.9636   2
   7  10  -3 9.26495 23.4017   2
 -10  -7   3 33.6360 18.0040   2
  -7  10   3 -14.702 21.5733   1
 -10   7  -3 -1.9707 11.2113   2
  10  -7   3 33.0628 23.4918   4
  -7  10  -3 20.6386 27.1009   1
 -10   7   3 15.5511 8.87404   2
  -7  10  -3 -15.676 16.2272   2
  10   7  -3 0.91572 18.0459   2
   7 -10  -3 13.4632 19.6255   4
  -7  10  -3 19.7017 14.0139   5
   7  10   3 -2.3753 23.7473   2
   7  10   3 14.2977 16.2762   5
  -7 -10   3 -5.0196 17.9514   2
 -10  -7  -3 23.1869 21.8186   2
 -10  -7  -3 -10.448 17.4850   3
 -10   7   3 -1.9564 16.8820   1
  -7 -10   3 28.6052 18.7945   3
  10  -9  -3 17.0611 22.2358   4
  -9  10   3 8.46750 12.6618   2
  -9 -10  -3 25.1043 23.0543   3
 -10   9  -3 -2.9987 13.4829   2
 -10  -9   3 8.37193 17.8640   2
  -9  10   3 7.91081 10.5549   5
   9  10  -3 -12.131 17.1305   2
 -10   9  -3 18.0402 23.9379   1
 -10   9  -3 -2.8472 9.57423   5
  -9 -10  -3 24.1204 25.2831   2
  -9  10   3 44.7171 25.5339   1
 -10  -9   3 -4.8761 21.1061   3
   9 -10   3 -1.5758 22.9742   4
  10   9   3 -6.0861 17.3784   2
  -9  10  -3 4.34293 15.5809   2
  10  -9   3 -17.794 15.5256   4
 -10   9   3 5.66998 11.7328   2
   9  10   3 -4.6234 19.0236   2
  10   9  -3 51.9440 23.2156   2
  -9  10  -3 -13.704 27.4830   1
  -9  10  -3 6.04252 12.8722   5
  -9 -10   3 -2.8407 21.1719   3
   9  10   3 17.5878 14.1802   5
  -9 -10   3 -17.678 18.1520   2
   9 -10  -3 1.59604 20.3563   4
 -10  -9  -3 -5.0396 17.9930   2
 -10   9   3 -1.0819 16.7537   1
 -10  -9  -3 1.64113 22.1150   3
 -11   0   3 2.98788 5.05715   5
   0  11   3 15.2222 16.6405   2
   0  11  -3 -23.804 15.5365   5
  11   0   3 -4.1819 15.2858   4
   0 -11   3 -4.2868 20.5609   2
   0 -11  -3 -30.988 8.63303   4
   0 -11   3 6.48033 18.7004   3
   0 -11   3 -20.716 12.8752   4
  11   0  -3 23.8269 21.3734   4
   0  11  -3 0.80319 19.8003   2
 -11   0   3 9.93986 10.8566   2
   0  11   3 18.4249 14.0474   5
 -11   0   3 -12.019 6.68805   5
 -11   0  -3 -3.8397 12.9642   2
 -11   0  -3 -13.313 13.0569   5
   0 -11  -3 -17.950 18.4289   3
   0 -11  -3 2.39326 15.8760   2
 -11   0   3 -0.8076 11.7461   3
   0  11   3 -44.632 14.2222   1
 -11   0  -3 -4.7406 8.89052   3
   0  11  -3 -5.4790 16.9264   1
  -2  11   3 9.51541 15.4401   5
   2 -11   3 19.6173 19.2316   2
   2 -11   3 14.7172 13.9869   3
   2  11  -3 15.1736 21.3566   2
 -11   2  -3 9.17103 13.8120   2
  -2 -11  -3 14.1446 17.1331   2
   2  11  -3 25.4418 21.9731   1
  -2  11   3 -2.8756 16.1423   1
 -11   2  -3 1.28632 5.25868   5
   2  11  -3 -4.5701 14.2942   5
  11  -2  -3 2.50001 17.4851   4
 -11  -2   3 -23.517 11.0258   2
  11   2   3 -16.417 18.0032   4
 -11  -2   3 0.54210 13.1814   3
  -2 -11  -3 11.3494 9.24105   4
   2 -11   3 -0.5134 13.4422   4
  -2  11   3 5.98295 18.7796   2
 -11   2  -3 17.7060 6.46849   5
  11   2   3 2.76109 11.2856   2
 -11   2  -3 -11.816 7.10143   3
  -2 -11  -3 3.37581 17.1438   3
  11  -2   3 -12.564 20.6168   4
   2 -11  -3 16.8071 17.4780   2
 -11  -2  -3 -5.7304 11.7236   3
   2  11   3 12.1125 18.1999   2
  -2 -11   3 6.13376 20.3307   3
   2  11   3 3.08758 18.0475   5
 -11  -2  -3 17.5073 14.7453   2
   2 -11  -3 5.54324 13.8490   4
  -2 -11   3 3.83136 17.1776   2
 -11   2   3 -9.1045 9.98876   3
  11   2  -3 24.8694 17.5981   4
 -11   2   3 1.25584 7.71828   2
 -11   2   3 -6.6330 9.10963   2
   2  11   3 27.4559 19.0605   1
  -2  11  -3 -9.8030 16.3990   1
  -2  11  -3 -13.537 14.6878   5
  -2  11  -3 16.7286 19.8066   2
   2 -11  -3 13.0002 18.0547   3
   4 -11   3 13.8134 16.6388   4
  -4  11   3 -7.3816 13.0328   5
  -4  11   3 -22.193 17.7070   1
  -4 -11  -3 19.9090 19.2301   2
 -11   4  -3 19.8923 13.7039   2
  -4 -11  -3 -8.7355 21.0443   3
 -11  -4   3 30.7744 17.0200   3
 -11   4  -3 10.7381 4.28740   5
 -11   4  -3 -35.556 21.2931   1
   4  11  -3 -18.677 13.1016   5
 -11  -4   3 16.8821 16.5414   2
   4  11  -3 -8.0704 22.3481   2
  11   4   3 14.1081 16.7850   2
   4  11  -3 2.41900 19.5907   1
   4 -11   3 14.8108 16.3554   2
  -4  11   3 -9.8357 16.3846   2
  11  -4  -3 2.90399 17.6118   4
  -4 -11   3 34.7739 19.3086   3
 -11   4   3 8.80287 7.70928   2
   4  11   3 -2.1607 14.5021   5
  11   4  -3 0.91164 12.8762   2
  11  -4   3 11.6281 18.7946   4
  -4  11  -3 -3.9096 18.3576   1
 -11  -4  -3 18.9108 15.0880   3
  -4 -11   3 10.0901 18.0402   2
 -11  -4  -3 -3.8821 16.2195   2
 -11   4   3 3.54145 9.43574   3
  -4  11  -3 17.1490 18.5704   2
   4  11   3 7.94743 23.2033   2
 -11   4   3 6.78792 6.45206   2
   4 -11  -3 -1.4356 13.7070   2
  -4  11  -3 -8.6785 13.8001   5
   4 -11  -3 -2.2265 13.9530   4
  11   6   3 3.99490 16.9485   2
 -11   6  -3 -1.4815 19.0321   1
 -11  -6   3 -1.3895 19.2163   2
 -11  -6   3 7.47939 17.6022   3
   6 -11   3 4.59965 18.5971   4
   6  11  -3 7.32463 19.3610   2
   6  11  -3 9.20794 18.0551   5
  -6  11   3 21.4907 15.9382   2
  -6 -11  -3 -22.689 17.6625   3
  -6 -11  -3 -40.395 17.1860   2
 -11   6  -3 6.70337 5.94397   5
 -11   6  -3 -5.1083 9.85969   2
  11  -6  -3 0.67644 22.6200   4
  -6  11   3 0.56636 20.4017   1
  -6  11   3 -0.1578 14.1519   5
   6 -11  -3 -1.9988 18.4085   4
  -6  11  -3 -26.994 25.0471   1
  11   6  -3 -22.443 13.8623   2
  11  -6   3 6.91689 18.9821   4
  -6 -11   3 21.1252 20.8300   2
   6  11   3 15.1395 24.0589   2
   6  11   3 -0.4937 17.1992   5
 -11   6   3 4.12786 7.27858   2
 -11  -6  -3 -14.099 15.8479   3
 -11   6   3 14.5432 10.1316   3
 -11  -6  -3 7.35624 16.9985   2
  -6  11  -3 7.32594 15.0722   5
  -6 -11   3 7.45094 19.0401   3
  -6  11  -3 29.8988 19.3339   2
 -11   6   3 -11.661 15.7211   1
  -8  11   3 5.06306 12.5390   5
  -8 -11  -3 -7.3551 18.0829   2
 -11   8  -3 -7.7907 25.8189   1
 -11   8  -3 -4.5553 12.8839   2
 -11   8  -3 -4.7137 8.58171   5
  -8  11   3 34.2874 24.1411   1
  -8  11   3 -0.6831 15.0640   2
  11   8   3 37.9113 21.3609   2
   8 -11   3 -25.593 19.5334   4
 -11  -8   3 3.02079 21.2069   3
   8  11  -3 2.21562 15.3354   5
   8  11  -3 16.9199 24.7914   2
  -8 -11  -3 34.0765 22.8047   3
  11  -8  -3 -10.696 17.1745   4
 -11  -8   3 -3.5481 20.6984   2
  11   8  -3 -2.7928 18.4489   2
 -11   8   3 -8.5116 8.95927   2
  -8  11  -3 -12.309 14.2837   5
   8  11   3 -21.874 15.1701   5
  11  -8   3 -50.255 22.9481   4
 -11   8   3 -3.4847 22.8092   1
  -8  11  -3 12.6264 18.1787   2
 -11  -8  -3 26.2154 22.6247   2
   8 -11  -3 7.15499 17.2089   4
 -11  -8  -3 19.5118 20.5986   3
  -8  11  -3 -37.026 20.8171   1
  -8 -11   3 -8.1726 23.1106   2
   8  11   3 10.3484 24.7192   2
  -8 -11   3 -22.089 16.5281   3
 -11 -10   3 -17.152 23.5247   2
  10 -11   3 -37.405 21.8637   4
 -10  11   3 -16.563 23.8439   1
 -10  11   3 -2.9549 12.1055   5
 -11 -10   3 27.3432 20.2268   3
 -10 -11  -3 30.6871 25.6955   2
 -11  10  -3 2.57619 14.0421   2
 -11  10  -3 -10.845 29.4511   1
 -10  11   3 21.3024 14.2606   2
  10  11  -3 -1.4893 23.5009   2
 -10 -11  -3 9.60732 20.0855   3
  11  10   3 36.3915 24.2879   2
  11 -10  -3 30.7277 26.2348   4
 -11  10  -3 -4.9867 12.4603   5
 -11 -10  -3 17.0738 23.2594   3
 -11  10   3 -3.0287 25.1281   1
  10  11   3 -24.863 17.8346   2
  11  10  -3 0.96038 21.0599   2
 -11  10   3 0.78142 9.03973   5
  10 -11  -3 5.76080 23.7229   4
 -10 -11   3 -38.423 17.2347   3
  11 -10   3 6.84644 25.9170   4
 -10  11  -3 -2.6449 13.5965   5
 -10  11  -3 -8.9527 12.9681   2
 -10  11  -3 -27.052 28.9527   1
 -10 -11   3 -16.448 23.0911   2
 -11  10   3 -6.1091 11.3683   2
 -11 -10  -3 -7.2713 23.0049   2
   1 -12   3 41.0608 15.9259   4
  12   1   3 15.6847 21.6734   4
   1  12  -3 42.1683 23.5771   1
   1 -12   3 86.6900 21.8838   2
  12  -1  -3 40.4333 20.9769   4
 -12  -1   3 57.0356 15.2730   3
  -1  12   3 28.4218 21.5345   2
   1  12  -3 -15.476 17.9214   5
  -1 -12  -3 41.9510 13.1542   4
  -1  12   3 52.2366 19.2843   5
  -1 -12  -3 23.2902 18.4063   3
   1 -12   3 42.3416 20.6093   3
 -12   1  -3 54.7839 12.4022   5
  -1 -12  -3 46.5522 24.4754   2
   1  12  -3 63.3498 25.0957   2
 -12   1  -3 54.4588 11.8586   3
  -1  12   3 56.0651 20.0705   1
 -12   1  -3 49.6979 15.6563   2
 -12  -1   3 54.4335 15.3870   2
 -12   1   3 51.5880 12.7777   2
   1 -12  -3 16.8869 17.3932   2
   1 -12  -3 26.2599 13.7510   4
   1  12   3 35.1578 20.6525   1
   1 -12  -3 67.6982 19.7533   3
  -1 -12   3 25.7457 18.3929   3
   1  12   3 46.2862 20.7540   2
  -1 -12   3 58.1923 21.0225   2
 -12   1   3 38.6212 13.0237   3
  -1  12  -3 37.3056 19.3548   5
 -12   1   3 45.4206 5.86815   5
  -1  12  -3 52.7884 24.1051   1
  -1 -12   3 21.2201 14.2329   4
  12  -1   3 55.2912 21.4210   4
  -1  12  -3 70.1075 23.9386   2
   1  12   3 15.7961 18.8883   5
 -12  -1  -3 27.9506 13.4550   3
 -12  -1  -3 33.3240 16.8159   2
  12   1  -3 31.1430 23.4191   4
 -12   3  -3 34.7495 17.8827   2
   3  12  -3 35.4134 17.9135   5
 -12  -3   3 9.47190 15.6834   3
  -3  12   3 30.8168 20.4478   2
  -3 -12  -3 39.6680 25.1333   2
  -3  12   3 19.1687 14.6212   5
  -3 -12  -3 120.553 27.2508   3
   3 -12   3 53.8783 18.2934   4
   3 -12   3 45.3654 18.6293   3
  12   3   3 36.9657 21.3306   4
   3 -12   3 45.3285 21.0750   2
 -12  -3   3 67.9640 17.5176   2
  -3  12   3 39.6523 20.0408   1
   3  12  -3 18.1658 20.5928   2
   3  12  -3 59.9050 25.6650   1
  12  -3  -3 57.5501 25.6509   4
 -12   3  -3 50.0071 8.25487   5
  -3 -12   3 17.1345 20.0482   2
   3  12   3 56.0696 22.6212   2
   3 -12  -3 40.4168 16.5037   2
  12  -3   3 58.2485 21.1503   4
  -3  12  -3 65.6885 19.8260   5
   3 -12  -3 57.4538 17.9453   4
 -12   3   3 58.9908 13.0164   3
  -3  12  -3 34.5535 24.5418   1
  -3  12  -3 54.5025 22.2848   2
 -12  -3  -3 25.4705 17.6325   2
 -12   3   3 43.1714 12.3153   2
  -3 -12   3 86.2941 22.5227   3
 -12  -3  -3 59.6031 18.9341   3
   3  12   3 37.5459 17.8419   5
 -12   5  -3 24.7664 24.6043   1
 -12  -5   3 22.0354 17.6230   2
   5  12  -3 9.72871 15.6003   5
 -12   5  -3 41.3128 12.5823   2
 -12  -5   3 26.0368 18.1248   3
 -12   5  -3 17.7109 6.36045   5
  -5  12   3 39.4385 22.1801   1
  -5  12   3 -10.921 14.3651   5
   5  12  -3 13.8329 20.7662   2
  -5 -12  -3 4.78315 23.3024   2
  -5  12   3 3.59835 18.3406   2
   5 -12   3 6.93197 18.6060   4
  -5 -12  -3 34.5372 23.2716   3
  12  -5  -3 24.1277 24.0151   4
 -12  -5  -3 26.9208 17.5636   3
  -5 -12   3 -30.089 23.4924   3
 -12  -5  -3 15.4158 19.1345   2
   5 -12  -3 5.26800 17.3974   4
  12  -5   3 6.67889 18.9372   4
 -12   5   3 15.1538 6.74071   2
  -5  12  -3 5.26236 19.2601   2
  -5 -12   3 -8.7245 24.2868   2
  -5  12  -3 6.07809 16.3129   5
   5  12   3 26.3597 20.0478   5
 -12   5   3 24.6831 21.5537   1
   5  12   3 58.5660 27.2301   2
  -5  12  -3 32.9102 22.6177   1
  -7  12   3 4.75329 14.8717   5
  -7  12   3 -5.6094 15.8834   2
  -7 -12  -3 11.1798 19.4709   3
   7 -12   3 20.0967 20.6159   4
 -12   7  -3 28.2822 27.2272   1
 -12  -7   3 34.7980 21.3746   2
  -7 -12  -3 11.9619 21.3585   2
  12  -7  -3 23.6265 24.5131   4
 -12   7  -3 15.4620 11.8230   2
   7  12  -3 21.8755 23.4180   2
 -12   7  -3 9.55616 8.62007   5
   7  12  -3 -1.7892 14.2141   5
 -12  -7   3 19.4831 17.3782   3
  -7  12   3 -31.007 21.2908   1
 -12  -7  -3 19.2320 18.0961   2
 -12  -7  -3 19.1754 19.8452   3
  -7  12  -3 -18.182 16.4732   2
  -7 -12   3 7.99389 24.5375   2
 -12   7   3 3.48705 7.57826   2
  -7  12  -3 9.70864 23.1690   1
   7  12   3 33.7145 23.1657   2
  -7  12  -3 -17.626 15.4999   5
  12  -7   3 -5.7510 23.2656   4
  -7 -12   3 -20.145 23.1604   3
   7  12   3 4.54844 18.5926   5
   7 -12  -3 18.8148 20.4086   4
 -12   7   3 -7.8516 22.1204   1
  -9 -12  -3 29.0315 21.9846   3
   9  12  -3 64.5724 28.5203   2
   9 -12   3 33.0010 24.1772   4
 -12   9  -3 32.5573 11.8186   5
 -12  -9   3 24.3135 23.6387   3
 -12   9  -3 35.4194 14.6605   2
  -9  12   3 22.2464 16.9234   2
  12  -9  -3 96.7598 30.4810   4
  -9  12   3 22.7256 14.3480   5
 -12   9  -3 12.9540 29.1857   1
  -9  12   3 39.7727 28.3236   1
  -9 -12  -3 -7.7730 20.8479   2
 -12  -9   3 10.2053 19.6171   2
 -12  -9  -3 10.4170 18.4267   3
 -12   9   3 52.2154 27.4536   1
   9  12   3 32.1422 22.4834   2
  -9  12  -3 56.1936 19.0505   2
 -12  -9  -3 5.97933 18.1239   2
  -9 -12   3 -17.895 21.3768   2
   9 -12  -3 -38.797 20.4558   4
  12  -9   3 25.1409 26.6165   4
 -12   9   3 31.3643 10.1738   2
  -9  12  -3 -27.934 28.8278   1
  -9  12  -3 13.6983 15.0835   5
  -9 -12   3 32.9204 22.3957   3
 -11  12   3 19.6627 13.9162   2
 -12  11  -3 16.1071 16.2306   2
 -12 -11   3 5.29523 21.8798   2
 -11  12   3 21.8134 13.3641   5
  11 -12   3 -30.375 18.2662   4
 -12 -11   3 -20.498 23.8034   3
 -11 -12  -3 -12.917 24.4697   2
 -12  11  -3 42.8400 32.6781   1
  12 -11  -3 -17.159 25.6858   4
  11  12  -3 -1.3914 26.1662   2
 -12  11  -3 6.75720 14.3243   5
 -11 -12  -3 20.9686 25.2951   3
 -11  12   3 -36.905 26.1152   1
 -12  11   3 7.22151 12.3433   2
 -11  12  -3 21.6091 17.2005   2
 -12  11   3 16.5036 30.0682   1
 -11 -12   3 -4.4301 25.4421   3
 -11 -12   3 -7.7711 20.0715   2
 -12 -11  -3 25.6852 24.4343   3
 -11  12  -3 36.3279 16.7057   5
  11  12   3 41.6602 24.6819   2
  11 -12  -3 35.4366 25.4570   4
 -12  11   3 17.8970 11.7298   5
 -12 -11  -3 80.3348 29.7504   2
  12 -11   3 27.5609 22.5571   4
 -11  12  -3 -38.282 31.3248   1
  13   0   3 38.0337 23.5791   4
   0 -13  -3 -8.4324 18.0028   3
   0  13   3 18.8621 15.9943   5
   0 -13  -3 26.2992 23.1369   2
  13   0  -3 15.0698 24.1242   4
   0 -13   3 -11.845 19.2093   3
 -13   0   3 -0.3611 10.6613   3
   0  13   3 -2.8697 18.2149   1
 -13   0  -3 -21.294 9.86159   3
   0 -13   3 3.48558 21.7234   2
   0  13  -3 -0.4638 14.4465   5
   0 -13  -3 -0.1641 13.3955   4
   0 -13   3 -1.9408 14.2108   4
 -13   0  -3 13.0021 14.9395   2
   0  13   3 13.1264 22.6477   2
   0  13  -3 -25.597 21.1632   2
   0  13  -3 -10.219 17.8523   1
 -13   0   3 21.9848 12.2531   2
 -13   2  -3 68.0604 18.3434   2
 -13  -2   3 59.4040 17.4851   3
   2  13  -3 79.2032 23.6482   5
  -2  13   3 50.5005 22.0323   1
  13   2   3 44.2850 23.7151   4
   2 -13   3 50.6958 19.0671   4
  13  -2  -3 52.4036 22.7151   4
 -13  -2   3 45.8362 16.9110   2
   2  13  -3 34.9299 26.3747   1
   2  13  -3 35.3881 26.0672   2
   2 -13   3 76.6574 20.0091   3
  -2  13   3 68.0787 24.0489   2
  -2  13   3 40.1948 17.3115   5
 -13   2  -3 57.6965 11.4541   5
  -2 -13  -3 62.1255 23.5044   2
   2 -13   3 36.9835 19.0819   2
  -2 -13  -3 51.8043 24.9163   3
  -2  13  -3 51.5736 20.7462   2
   2 -13  -3 43.9842 21.1421   2
   2 -13  -3 43.8962 16.7557   4
 -13  -2  -3 35.4559 16.7697   3
  -2 -13   3 45.2978 14.9901   4
  -2 -13   3 38.4500 24.0818   2
  -2 -13   3 50.9881 20.4344   3
   2  13   3 59.9906 23.3498   2
  13  -2   3 71.0649 22.3785   4
   2  13   3 47.5176 22.4540   1
   2  13   3 25.5132 21.0067   5
 -13   2   3 61.5317 13.6507   2
  -2  13  -3 55.6752 21.4464   5
 -13   2   3 40.0402 13.2254   3
  -2  13  -3 46.8134 21.8910   1
 -13  -2  -3 51.0767 20.1075   2
   4 -13   3 9.52740 17.8989   4
 -13   4  -3 -17.113 12.5636   2
  -4 -13  -3 28.6443 25.4124   2
  -4  13   3 11.4528 19.5497   2
 -13   4  -3 17.0484 25.8634   1
 -13  -4   3 -15.769 15.1899   2
 -13  -4   3 -0.4968 16.4141   3
 -13   4  -3 0.71766 6.57596   5
  13  -4  -3 -9.7748 22.6421   4
  -4  13   3 -17.313 18.2167   1
  -4  13   3 -4.3249 16.3909   5
  -4 -13  -3 -11.249 22.3071   3
   4  13  -3 -17.519 18.4419   5
   4  13  -3 -3.2124 25.4299   2
  -4 -13   3 -18.660 18.8540   3
 -13  -4  -3 -5.0852 16.5893   2
 -13  -4  -3 5.76219 15.2339   3
  -4 -13   3 21.2057 24.9976   2
 -13   4   3 5.87197 7.16247   2
  -4  13  -3 -21.143 15.2421   5
   4 -13  -3 19.0661 16.6321   4
   4  13   3 -10.369 15.0494   5
  13  -4   3 2.24032 23.6402   4
   4  13   3 21.6196 24.2825   2
  -4  13  -3 21.1386 20.1994   2
  -4  13  -3 45.5545 25.9405   1
  13  -6  -3 39.0602 23.2699   4
 -13   6  -3 25.6456 8.07027   5
  -6  13   3 42.2363 17.1535   5
 -13  -6   3 34.8105 19.7124   3
  -6 -13  -3 32.1682 25.6429   3
  -6 -13  -3 44.9629 26.8759   2
  -6  13   3 12.2150 18.2287   2
   6  13  -3 13.2010 22.7020   2
  -6  13   3 58.7336 27.1121   1
 -13  -6   3 39.9834 21.0171   2
 -13   6  -3 13.2017 27.2841   1
   6  13  -3 28.9910 20.7767   5
   6 -13   3 44.6078 22.1840   4
 -13   6  -3 13.6951 11.6889   2
   6  13   3 26.8149 20.4017   5
   6 -13  -3 23.9879 19.4852   4
   6  13   3 57.2605 23.4219   2
 -13  -6  -3 8.17375 18.7399   3
  -6 -13   3 50.1112 23.4061   2
  -6  13  -3 -11.559 27.1576   1
  13  -6   3 46.6749 27.9292   4
  -6  13  -3 31.2924 21.1613   2
  -6 -13   3 28.4583 26.8138   3
 -13  -6  -3 43.7655 21.2118   2
  -6  13  -3 28.2819 18.3381   5
 -13   6   3 43.5854 24.6819   1
  -8 -13  -3 47.2989 25.4856   2
  -8  13   3 45.2635 19.5502   2
  13  -8  -3 38.5076 26.9717   4
   8 -13   3 -0.4461 22.5180   4
 -13   8  -3 34.6214 14.0071   2
  -8 -13  -3 42.0615 22.7574   3
   8  13  -3 12.9792 21.4144   2
  -8  13   3 42.5603 17.3584   5
 -13   8  -3 28.0676 29.7000   1
 -13   8  -3 36.1284 11.1511   5
  -8  13   3 -3.8868 24.7340   1
 -13  -8   3 39.4980 23.0152   3
 -13  -8   3 44.7682 20.0712   2
  -8 -13   3 57.5729 27.6203   3
  13  -8   3 -16.639 24.7980   4
  -8  13  -3 30.3854 18.5941   2
  -8 -13   3 6.25260 25.8875   2
  -8  13  -3 -22.190 27.3626   1
 -13  -8  -3 -26.876 20.2809   2
 -13   8   3 35.4795 26.7708   1
   8  13   3 19.8398 19.7272   5
 -13  -8  -3 27.5838 18.5945   3
   8 -13  -3 39.1504 18.4844   4
  -8  13  -3 61.9110 20.6227   5
   8  13   3 45.5361 28.7598   2
 -13  10  -3 -9.1997 12.7007   2
  10 -13   3 19.0795 24.8837   4
 -13  10  -3 13.6058 12.5763   5
 -10  13   3 -0.8698 15.5277   2
  10  13  -3 30.4991 27.4854   2
 -10 -13  -3 34.4498 23.3440   2
 -13 -10   3 22.4154 25.0910   2
 -13 -10   3 22.6397 23.2652   3
 -10  13   3 -7.9077 11.9339   5
  13 -10  -3 21.8578 21.6441   4
 -13  10  -3 3.36366 26.1152   1
 -10 -13  -3 45.5843 27.4257   3
 -10  13   3 23.7484 27.5907   1
 -10  13  -3 25.6007 18.0962   5
 -10 -13   3 -22.105 20.3237   2
 -13 -10  -3 9.52116 22.6462   3
 -10  13  -3 -25.760 31.2999   1
 -13 -10  -3 -26.356 18.3029   2
  10  13   3 16.7083 23.0090   2
 -13  10   3 27.0800 26.8361   1
 -10  13  -3 15.8264 16.8985   2
 -10 -13   3 -26.684 24.6546   3
  13 -10   3 -15.525 21.7739   4
  10 -13  -3 -43.539 21.3890   4
 -12  13   3 -11.936 13.1793   5
  12 -13   3 -0.8889 26.0820   4
 -12  13   3 16.5281 14.7942   2
 -13 -12   3 5.05961 26.8086   3
 -13  12  -3 14.3064 15.2166   5
  13 -12  -3 8.12562 25.5108   4
 -13 -12   3 45.0441 28.1790   2
 -13  12  -3 -12.627 34.3768   1
 -12 -13  -3 -5.7343 26.3239   2
 -13  12  -3 12.4017 15.1634   2
 -12 -13  -3 74.5763 27.8790   3
  12 -13  -3 31.0028 22.2002   4
 -13  12   3 -28.500 29.8500   1
 -12  13  -3 -14.290 34.0701   1
 -12 -13   3 -17.669 26.9826   2
  13 -12   3 1.33462 27.0414   4
 -12  13  -3 16.0032 16.2869   2
 -13 -12  -3 10.1534 24.7287   3
 -12  13  -3 -3.4607 16.8044   5
 -13 -12  -3 32.4999 28.3960   2
 -12 -13   3 5.01683 25.3769   3
 -13  12   3 -21.967 12.2722   5
   1  14  -3 -5.7515 24.1374   1
  14  -1  -3 27.5060 25.3382   4
   1  14  -3 -25.223 15.9897   5
   1 -14   3 17.7513 21.3576   3
   1  14  -3 33.2861 21.4670   2
  -1  14   3 8.31363 20.9821   2
 -14  -1   3 12.0774 13.9941   2
   1 -14   3 -14.152 17.0917   2
  -1  14   3 12.9508 19.6255   1
  14   1   3 11.2859 19.5408   4
 -14  -1   3 6.04575 14.4347   3
 -14   1  -3 -6.0410 14.1597   2
 -14   1  -3 -17.652 16.0744   5
   1 -14   3 0.73136 15.4890   4
  -1 -14  -3 27.5662 20.0482   3
  -1  14   3 17.0521 20.3718   5
  -1 -14  -3 -16.483 16.7456   2
   1 -14  -3 25.5365 18.7626   3
  14   1  -3 -25.680 22.0718   4
  -1 -14   3 26.4019 22.8737   3
  -1 -14   3 6.65529 23.4840   2
  -1  14  -3 25.4059 23.6923   1
  -1  14  -3 -7.1873 19.8707   5
 -14   1   3 17.4468 11.4152   5
 -14  -1  -3 0.70268 13.2870   2
  14  -1   3 -15.169 16.7892   4
   1  14   3 9.61411 24.4352   2
 -14   1   3 13.3152 11.7503   2
   1  14   3 10.4608 21.8912   1
   1  14   3 -22.909 19.7929   5
   1 -14  -3 -12.060 19.9445   2
  -1  14  -3 -25.286 21.8166   2
 -14  -3   3 -6.0358 14.3508   2
 -14   3  -3 -1.8590 20.4693   1
   3 -14   3 -28.317 15.0581   4
  -3  14   3 -18.812 16.4792   5
 -14   3  -3 13.7952 17.2876   2
  -3 -14  -3 8.51387 20.5744   2
  14   3   3 -24.578 19.7707   4
  -3  14   3 -3.1684 20.7327   2
   3 -14   3 15.5935 19.5520   3
   3  14  -3 -13.748 22.8529   1
  -3 -14  -3 42.2910 21.7656   3
  -3  14   3 -8.7221 18.7963   1
   3  14  -3 -7.1876 25.1689   2
 -14  -3   3 14.5567 16.1360   3
  14  -3  -3 14.1880 21.8010   4
   3  14  -3 11.4920 20.8202   5
 -14   3  -3 5.77333 9.02462   5
  -3 -14   3 -20.841 18.5664   2
  -3  14  -3 0.01878 23.6647   1
 -14   3   3 8.38123 10.8050   2
   3  14   3 11.5701 25.1867   2
  -3  14  -3 -10.055 14.7251   5
  -3 -14   3 6.73743 23.6352   3
 -14  -3  -3 22.0214 17.6376   2
  -3  14  -3 -7.3558 16.6956   2
   3 -14  -3 -29.839 14.9445   4
  14  -3   3 -3.2163 24.7430   4
   3  14   3 -38.746 19.1887   5
 -14  -3  -3 -28.195 14.8629   3
   5  14  -3 20.1742 23.4712   2
  -5 -14  -3 8.55875 25.9775   2
 -14  -5   3 40.4788 19.6673   2
 -14   5  -3 25.1806 9.46157   5
  -5 -14  -3 74.3084 24.6463   3
   5  14  -3 31.5871 22.7749   5
   5 -14   3 14.1162 18.9794   4
  14  -5  -3 49.5845 23.6506   4
  -5  14   3 22.8477 22.2615   1
 -14  -5   3 55.4550 20.4138   3
 -14   5  -3 31.7837 12.5414   2
  -5  14   3 35.6856 20.2659   2
  -5  14   3 61.0227 19.8756   5
 -14   5  -3 55.4939 30.0612   1
  -5  14  -3 -5.4264 25.6528   1
 -14  -5  -3 44.0584 20.2514   2
   5 -14  -3 44.5733 19.7859   4
  -5  14  -3 28.3598 18.7100   2
  -5 -14   3 60.9242 28.9830   2
 -14   5   3 15.8402 20.4756   1
   5  14   3 37.4341 29.6528   2
  -5 -14   3 67.0707 24.8981   3
 -14  -5  -3 51.6872 18.9761   3
   5  14   3 42.1831 19.5680   5
  -5  14  -3 17.8886 18.9469   5
  14  -5   3 13.6398 25.6143   4
   7  14  -3 -21.619 27.4985   2
   7 -14   3 -17.665 20.0934   4
  -7 -14  -3 34.6439 28.3244   3
 -14  -7   3 34.9759 21.0209   3
  -7  14   3 -4.5747 21.2173   1
 -14   7  -3 -12.995 25.6909   1
 -14  -7   3 -4.4629 20.8499   2
  -7  14   3 7.96769 16.1849   5
 -14   7  -3 18.0179 11.3031   2
  14  -7  -3 40.5246 22.4070   4
  -7  14   3 5.93927 17.8495   2
 -14   7  -3 18.3132 9.65418   5
   7  14  -3 -6.1916 19.4237   5
  -7 -14  -3 -31.461 24.4744   2
  -7  14  -3 18.8133 18.0989   5
 -14  -7  -3 19.4263 18.9049   2
   7  14   3 -16.876 26.9520   2
  -7  14  -3 -5.8127 18.7623   2
  -7 -14   3 4.92970 21.1053   3
   7  14   3 13.4458 19.8828   5
  -7 -14   3 -5.2840 21.0818   2
  14  -7   3 3.12002 21.1009   4
   7 -14  -3 32.0425 20.6429   4
 -14  -7  -3 20.3122 21.0170   3
  -7  14  -3 46.5372 29.9797   1
 -14   7   3 -12.263 23.9967   1
  14  -9  -3 -17.104 20.6538   4
   9  14  -3 6.24688 23.3419   2
  -9  14   3 2.45500 13.6601   5
  -9  14   3 41.5734 19.4670   2
 -14   9  -3 -4.6574 10.4325   5
   9 -14   3 1.78087 22.0344   4
 -14  -9   3 7.21414 22.4238   2
 -14  -9   3 0.37494 21.2225   3
 -14   9  -3 15.3690 30.6972   1
  -9 -14  -3 -32.355 24.9229   3
  -9 -14  -3 -3.7930 23.0923   2
  -9  14  -3 -1.8761 16.5258   5
 -14  -9  -3 -43.394 22.5199   2
   9 -14  -3 50.6262 23.1142   4
  -9 -14   3 -13.546 27.1389   3
 -14   9   3 14.7025 25.8245   1
  -9  14  -3 -24.048 28.4471   1
 -14  -9  -3 -17.475 20.0327   3
   9  14   3 23.3282 23.0676   2
  14  -9   3 26.3761 24.0602   4
  -9  14  -3 3.74723 17.2974   2
  -9 -14   3 14.8160 23.0645   2
 -11  14   3 -17.592 14.7310   2
 -11  14  -3 25.8869 16.3716   2
  11  14   3 2.84313 27.0092   2
   0  15   3 -22.024 18.5911   2
   0  15   3 -15.987 21.4852   5
  15   0  -3 19.8780 25.2486   4
 -15   0   3 -10.493 11.4503   2
   0  15  -3 -3.2936 19.7360   2
   0 -15  -3 -26.729 17.9361   2
 -15   0  -3 -1.7609 15.6907   2
   0 -15  -3 1.55291 23.1858   3
  15   0   3 2.60116 19.8561   4
   0 -15   3 26.5498 22.1596   3
   0  15   3 4.22196 20.4714   1
   0  15  -3 15.2645 17.7545   5
   0  15  -3 10.7204 20.4649   1
   0 -15   3 22.1925 23.5944   2
  -2  15   3 50.6559 22.1524   5
 -15   2  -3 37.8376 19.5330   2
   2  15  -3 12.7709 27.5723   2
  -2  15   3 40.3288 22.1080   1
  -2  15   3 70.7425 23.0125   2
  -2 -15  -3 37.3825 25.9007   3
   2  15  -3 5.17052 18.2429   5
 -15  -2   3 28.1131 16.9612   2
 -15  -2   3 14.5700 17.5860   3
  -2 -15  -3 33.4899 25.9583   2
   2 -15   3 37.1155 22.9151   3
  15   2   3 48.2437 25.4554   4
 -15   2  -3 43.1740 17.1985   5
  15  -2  -3 18.9735 21.4858   4
   2  15  -3 47.0247 26.6489   1
   2  15   3 34.3901 23.5062   2
  -2  15  -3 70.9025 27.6112   2
 -15  -2  -3 49.0985 19.7698   2
  -2 -15   3 76.9192 25.2430   3
  -2 -15   3 54.1387 23.2557   2
   2  15   3 40.6732 23.6443   5
  15  -2   3 13.2130 21.0745   4
 -15   2   3 39.4805 14.7680   2
  -2  15  -3 6.52928 24.8476   1
  -2  15  -3 74.2820 23.3256   5
  -4  15   3 -14.624 20.5685   2
  -4 -15  -3 10.6266 26.5424   2
   4 -15   3 -0.4540 19.9794   4
  -4  15   3 -9.3402 18.1646   5
  -4 -15  -3 5.40757 21.2792   3
   4  15  -3 -8.6307 22.5455   2
  15  -4  -3 -26.654 21.1349   4
   4  15  -3 35.7443 22.7054   5
 -15   4  -3 -14.463 10.3199   5
 -15  -4   3 5.28144 19.3858   3
 -15   4  -3 -9.2543 12.7282   2
  -4  15   3 14.9079 24.5806   1
 -15   4  -3 -13.181 21.6677   1
 -15  -4   3 0.32758 18.3061   2
   4  15   3 28.8722 22.5166   5
   4  15   3 8.80282 23.1812   2
  -4  15  -3 -4.9864 23.5025   1
  -4 -15   3 37.7108 27.8823   2
  -4 -15   3 24.7719 22.9301   3
  -4  15  -3 -12.946 22.3128   2
 -15   4   3 -1.1066 25.0460   1
 -15  -4  -3 -6.7566 16.7970   2
  15  -4   3 39.6205 23.2076   4
  -4  15  -3 -28.205 17.9115   5
 -15  -4  -3 -6.6157 17.8554   3
 -15  -6   3 10.7254 19.4710   3
 -15   6  -3 -44.276 26.2018   1
  -6 -15  -3 20.0085 25.8851   2
 -15  -6   3 0.44736 19.1217   2
   6  15  -3 10.7197 23.3706   2
  -6  15   3 26.2303 20.1894   2
   6 -15   3 -21.303 17.2399   4
  -6 -15  -3 -5.7748 21.8131   3
  15  -6  -3 -9.8884 20.6518   4
  -6  15   3 -13.502 17.7353   5
   6  15  -3 17.0157 21.9006   5
  -6  15  -3 8.31084 19.5992   5
   6  15   3 -25.773 21.9043   2
   6 -15  -3 16.1795 22.1367   4
 -15  -6  -3 -12.213 18.0809   3
 -15   6   3 10.0248 24.4875   1
  -6 -15   3 12.4759 22.2293   3
   6  15   3 -3.4610 15.7049   5
  -6  15  -3 -18.888 19.4940   2
  -6 -15   3 -3.0291 22.1276   2
 -15  -6  -3 22.6691 20.9400   2
  15  -6   3 23.7149 23.1203   4
  -6  15  -3 -59.717 23.3338   1
 -15  -8   3 -32.110 18.2162   3
  -8 -15  -3 35.7333 29.6950   2
  -8 -15  -3 40.0031 28.3187   3
 -15   8  -3 -11.487 29.9042   1
   8  15  -3 16.6875 28.2859   2
  -8  15   3 2.62856 17.0370   5
  15  -8  -3 -3.0849 26.4650   4
  -8  15   3 -4.5352 17.2942   2
 -15  -8   3 -57.780 19.0409   2
   8 -15   3 -30.233 19.9805   4
 -15   8   3 2.55499 19.8692   1
  -8 -15   3 -46.982 19.1454   3
  15  -8   3 -24.929 27.6368   4
  -8  15  -3 -12.531 19.0207   2
  -8  15  -3 5.87690 20.5013   5
 -15  -8  -3 12.9582 18.1125   3
  -8 -15   3 13.3169 28.6909   2
   8 -15  -3 4.11504 24.3438   4
   8  15   3 20.8278 24.4966   2
  -8  15  -3 0.37333 23.4477   1
 -15  -8  -3 -10.794 20.3347   2
  -1 -16  -3 46.7575 21.8768   3
   1 -16   3 -23.672 21.5634   3
  -1  16   3 15.9553 20.9760   1
  16  -1  -3 -13.063 24.6370   4
 -16  -1   3 -16.732 13.0828   2
  -1  16   3 -37.692 21.6596   2
   1  16  -3 -15.733 26.4159   2
   1  16  -3 -43.843 19.0740   1
  16   1   3 -55.325 22.7891   4
 -16   1  -3 -0.1886 16.4070   2
  -1  16   3 -3.0367 22.1705   5
  -1 -16  -3 49.1046 26.9655   2
   1  16  -3 -4.4584 18.7741   5
  -1 -16   3 -8.2410 24.7999   2
   1  16   3 -19.572 25.8000   2
   1  16   3 -2.1595 17.3230   5
 -16   1   3 -3.0496 11.9731   2
  -1  16  -3 -45.551 23.2116   2
  -1 -16   3 -7.3299 17.4694   3
   1  16   3 -8.2125 21.7678   1
  -1  16  -3 -19.053 22.6588   1
  -1  16  -3 -23.324 21.6027   5
 -16  -1  -3 16.4964 15.7357   2
  16  -1   3 3.74182 21.0440   4
   3  16  -3 59.4407 21.7490   5
  -3 -16  -3 -19.652 23.0799   3
  -3  16   3 45.8768 22.6322   5
   3  16  -3 16.5744 27.9785   2
 -16   3  -3 14.7541 15.0699   2
  -3  16   3 19.9351 22.3037   2
  16  -3  -3 16.7387 20.9220   4
 -16  -3   3 -25.108 15.6363   2
   3  16  -3 -2.4484 26.6887   1
 -16   3  -3 26.0335 25.4776   1
  -3 -16  -3 6.22490 21.2199   2
 -16   3  -3 32.5342 14.3620   5
 -16  -3  -3 26.6784 17.7851   2
  -3  16  -3 20.2908 21.8534   5
  -3  16  -3 8.88792 24.7088   2
   3  16   3 -36.284 25.6247   2
   3  16   3 -19.276 17.9393   5
  -3 -16   3 12.7058 26.1483   3
  -3  16  -3 8.86313 25.1943   1
  -3 -16   3 15.0833 26.2675   2
  16  -3   3 2.73136 26.8854   4
  -5 -16  -3 -35.888 24.2281   3
   5  16  -3 13.8346 24.4638   2
  16  -5  -3 -7.6898 25.4947   4
 -16  -5   3 -1.3785 17.6526   2
   5  16  -3 -26.288 19.8053   5
  -5  16   3 -7.5895 20.1132   5
 -16  -5   3 -28.639 16.8345   3
  -5  16   3 -27.517 19.7367   2
  -5 -16  -3 39.5868 28.2467   2
 -16   5  -3 -29.135 21.5903   1
   5  16   3 25.7537 23.7908   2
   5  16   3 -8.4774 18.7099   5
 -16  -5  -3 30.8703 20.2031   2
  -5 -16   3 -3.8348 23.0450   2
  16  -5   3 -10.965 21.5313   4
  -5  16  -3 -9.1386 21.9917   2
  -5 -16   3 -17.214 20.3646   3
  -5  16  -3 -19.983 23.2061   1
  -5  16  -3 1.94040 19.4670   5
 -16   5   3 -23.322 22.2270   1
  -7 -16  -3 6.54569 29.3558   2
  -7  16   3 17.0149 20.0333   5
  -7  16   3 0.58834 18.9552   2
  16  -7  -3 -7.4491 22.7294   4
 -16  -7   3 17.9667 20.6636   3
  -7 -16  -3 -13.003 22.5814   3
   7  16  -3 33.5879 25.8476   2
 -16   7  -3 45.7524 32.8808   1
   7 -16   3 6.07658 21.3059   4
 -16  -7   3 32.8614 22.2684   2
 -16  -7  -3 -14.786 21.9910   3
  -7 -16   3 16.0264 28.1624   3
 -16  -7  -3 0.69658 22.1030   2
 -16   7   3 13.7318 24.2474   1
  -7  16  -3 40.4269 21.0109   5
  16  -7   3 -8.0505 28.3035   4
   7  16   3 1.58680 29.5516   2
  -7  16  -3 22.1412 22.7901   2
   7  16   3 47.7324 24.4387   5
  -7 -16   3 44.0642 31.3919   2
  -7  16  -3 26.0345 28.2364   1
   0  17  -3 18.2163 23.3843   5
 -17   0   3 3.27447 14.1315   2
   0  17  -3 40.8077 28.1894   2
   0 -17   3 41.3653 24.8486   3
   0  17   3 23.3066 23.8905   5
   0  17  -3 -39.121 23.3393   1
  17   0   3 11.2538 24.9415   4
 -17   0  -3 3.44792 15.8967   2
   0  17   3 -19.937 21.1743   2
 -17   2  -3 -5.5517 17.0092   2
  -2  17   3 2.22423 20.6989   2
  -2 -17  -3 34.3807 26.8498   3
   2  17  -3 -44.550 26.4118   2
  -2 -17  -3 19.7793 22.7523   2
   2  17  -3 -13.018 25.1573   1
  17  -2  -3 34.3367 30.3970   4
  -2  17   3 -3.9160 17.3526   5
 -17  -2   3 19.2900 16.0005   2
   2  17  -3 -20.230 22.6031   5
  -2  17  -3 4.27661 23.9250   2
  -2 -17   3 2.47483 24.2372   3
  -2  17  -3 -10.875 24.6016   1
  -2 -17   3 -6.1798 25.9371   2
  -2  17  -3 -3.1467 17.1507   5
 -17  -2  -3 -16.408 17.1184   2
   2  17   3 -11.575 26.6689   2
   2  17   3 60.7250 26.2105   5
  17  -2   3 -17.881 20.1029   4
 -17  -4   3 17.6411 19.4785   2
   4  17  -3 32.6913 21.0052   5
  -4 -17  -3 55.1550 25.8433   2
  -4 -17  -3 38.5302 28.2729   3
  17  -4  -3 -52.836 25.7911   4
  -4  17   3 19.1724 23.9904   2
 -17   4  -3 77.6136 34.0152   1
   4  17  -3 30.7530 30.8503   2
  -4  17   3 16.2711 18.7640   5
  -4 -17   3 48.8777 28.8855   3
  17  -4   3 7.82288 23.9077   4
  -4  17  -3 -5.0014 21.6858   5
 -17   4   3 48.1945 25.3784   1
 -17  -4  -3 19.9667 21.3764   2
  -4  17  -3 51.6395 25.9040   1
  -4  17  -3 -26.536 23.2466   2
   4  17   3 42.0277 25.6846   5
   4  17   3 33.2365 26.6571   2
  -4 -17   3 52.4103 26.4139   2
   0   0  -4 -0.4285 3.59205   2
   0   0  -4 -6.0947 2.86646   1
   0   0   4 -3.9215 2.78451   2
   0   0  -4 -7.5317 5.16115   2
   0   0   4 -0.2771 5.55640   2
   1  -1  -4 -3.1272 5.01261   4
  -1   1  -4 11.7566 7.51817   1
   1   1   4 4.78761 5.43897   3
  -1  -1   4 -1.8977 6.20917   2
   1  -1  -4 0.87123 1.84113   2
  -1   1   4 -1.2807 3.63905   2
   1   1  -4 0.55883 5.48490   2
   1   1  -4 -2.6993 3.75169   5
  -1  -1   4 4.48975 6.80761   3
   1  -1   4 -3.5280 3.99172   5
   1   1   4 -6.5596 5.53049   2
   1   1   4 0.85911 6.17687   2
  -1   1  -4 -7.6990 3.14674   5
   1   1  -4 -0.2556 4.18350   2
   1  -1   4 -2.1195 3.68173   3
  -1   1  -4 -2.9186 4.25821   2
  -1   1  -4 -5.1158 6.10900   2
   1   1  -4 -2.7810 5.39443   3
  -1   1   4 0.77324 5.06394   4
  -1  -1  -4 1.06979 5.39804   3
  -1  -1  -4 -0.5428 6.08693   2
   1  -1  -4 -6.5790 3.40785   2
  -1  -1   4 -1.0882 3.62606   5
  -1   1   4 0.36687 3.38413   2
  -1  -1  -4 -3.3138 5.52766   2
  -1  -1   4 -1.3249 3.98525   2
   1  -1   4 4.51453 6.02969   2
  -1   1  -4 4.37617 2.78577   3
   1   1  -4 -1.4483 8.24052   1
   1  -1   4 -0.1095 5.48670   2
   0   2   4 716.135 33.4598   2
   0  -2  -4 796.971 34.8471   2
   2   0   4 805.196 31.1806   5
   0  -2   4 792.764 36.1239   2
   2   0   4 756.393 34.0901   4
  -2   0   4 725.392 34.0373   3
   0  -2   4 732.878 32.5050   5
   0   2   4 682.772 29.9025   1
  -2   0  -4 740.674 29.8957   3
   0  -2  -4 626.740 29.1802   4
   0   2  -4 764.468 36.7408   1
  -2   0   4 761.047 30.4829   2
   0  -2   4 726.433 32.8462   3
  -2   0  -4 802.358 34.3070   2
   2   0   4 816.749 35.4751   2
   2   0   4 750.502 30.1168   3
   0   2  -4 725.801 34.4897   2
   2   2  -4 1843.73 70.2765   5
   2  -2   4 1817.98 67.3109   5
  -2  -2   4 1743.24 72.8899   2
  -2   2   4 1672.50 67.7495   2
  -2   2  -4 1735.63 75.3205   1
   2   2  -4 1866.03 73.4639   3
  -2  -2  -4 1758.11 73.4916   2
  -2  -2   4 1815.01 72.7418   2
   2   2   4 1764.14 73.6372   2
   2   2   4 1711.73 67.9383   4
   2  -2  -4 1707.38 67.3495   2
   2  -2   4 1729.49 73.1508   4
  -2  -2  -4 1824.07 72.8212   3
  -2  -2   4 1917.45 71.0738   5
   2   2  -4 1830.17 75.7816   1
   2  -2  -4 1741.10 72.3801   4
   2  -2   4 1688.69 70.8190   2
  -2   2  -4 1695.46 72.0024   2
   2  -2   4 1743.31 66.9675   3
  -2   2   4 1695.32 67.7928   2
  -2  -2  -4 1807.78 67.9512   4
   2   2  -4 1765.43 73.4174   2
  -2   2  -4 1732.15 71.5124   2
  -2  -2   4 1722.01 73.4226   3
  -2   2   4 1826.40 72.9478   4
   2   2   4 1903.69 73.1137   3
  -2   2  -4 1718.62 66.9057   3
  -2   2  -4 1727.62 68.6402   5
   3  -1  -4 174.532 19.0760   4
  -1  -3  -4 197.440 23.7082   2
   3   1   4 160.502 13.5820   5
   3   1   4 187.045 16.6549   5
  -3   1  -4 179.112 11.3379   5
   1   3  -4 193.123 22.8375   1
   3   1   4 191.331 20.5013   2
  -3  -1   4 170.017 18.1607   4
  -3  -1   4 152.350 10.4806   5
  -3  -1   4 210.064 20.0928   3
   1   3  -4 167.596 16.5432   5
   3   1   4 163.043 17.3312   4
   1  -3   4 168.325 16.1035   3
   1   3  -4 204.457 21.1861   2
  -3  -1   4 184.160 16.5720   2
  -1   3   4 166.925 19.5322   3
  -3  -1   4 162.338 16.0310   2
  -1   3   4 191.590 15.7598   4
  -3   1  -4 204.237 21.2222   4
  -1   3   4 171.811 17.3771   2
  -3   1  -4 172.214 20.3288   2
  -3   1  -4 185.934 23.5888   2
  -1   3   4 184.940 15.9690   1
   3   1   4 177.716 16.0047   3
  -1  -3  -4 167.281 21.9112   3
  -1   3   4 178.225 18.0941   2
   1   3   4 182.403 23.7526   2
  -3  -1  -4 182.306 16.1929   3
   3  -1   4 217.970 19.9492   2
   3   1  -4 172.393 16.2971   2
  -3  -1  -4 179.913 19.7322   2
  -3  -1  -4 198.358 17.5053   4
  -3   1   4 185.708 18.3800   4
  -1   3  -4 169.641 23.7226   1
  -3  -1  -4 172.308 17.8371   2
  -1   3  -4 170.713 16.2330   5
   1  -3  -4 163.328 17.5870   2
   3   1  -4 198.928 20.9048   3
   1  -3  -4 197.421 16.3404   4
   3  -1   4 170.838 19.3081   4
  -1  -3   4 184.607 19.8622   2
  -1   3  -4 185.206 15.9802   3
  -1  -3   4 131.960 16.1515   3
  -1   3  -4 166.034 18.2858   2
  -1   3  -4 165.831 18.2146   2
  -3   3   4 -3.0798 6.85040   2
  -3  -3   4 -0.8071 10.0297   5
  -3   3   4 -11.277 13.3165   4
  -3   3  -4 7.70162 6.59867   5
   3  -3   4 -9.6502 10.1490   2
  -3  -3   4 16.1054 14.7999   2
  -3   3  -4 -13.170 12.1158   4
  -3   3   4 -5.7821 6.19294   2
  -3  -3  -4 4.58362 8.01539   4
  -3  -3  -4 -4.0501 15.2612   2
  -3   3  -4 -14.748 10.7548   2
  -3   3  -4 8.72095 8.96731   2
  -3   3   4 4.07252 10.9938   1
   3   3   4 -16.025 12.4594   2
  -3  -3   4 2.20174 11.4094   3
   3   3   4 -6.1347 7.42352   4
  -3   3  -4 28.1241 18.7612   1
   3   3  -4 2.92205 9.14590   5
   3  -3  -4 -2.1164 6.03430   2
   3  -3   4 6.51935 12.2053   4
  -3   3  -4 4.76454 6.48747   3
   3  -3  -4 10.3290 13.8720   4
   3   3  -4 3.19622 14.8440   2
   3  -3   4 1.43429 6.11024   3
  -3  -3  -4 5.27514 11.6490   3
   3   3   4 4.51254 11.2957   5
   4   0   4 960.630 39.7846   3
  -4   0  -4 950.930 39.4972   3
  -4   0   4 1000.64 39.8762   2
   0  -4  -4 927.188 39.1089   4
   0   4  -4 912.795 46.8576   2
   0  -4   4 1022.45 46.0682   3
   4   0   4 928.726 46.8963   4
  -4   0   4 884.453 43.4659   3
   0  -4  -4 873.386 45.3848   3
  -4   0   4 964.689 46.4689   4
   4   0   4 938.331 45.3834   2
   0   4  -4 928.635 49.5283   1
  -4   0  -4 974.123 44.0916   2
   0   4  -4 908.387 43.7098   5
   0  -4  -4 944.253 46.3951   2
   0   4   4 929.969 42.7106   1
  -4   0   4 916.793 39.2229   2
   4   0  -4 912.653 46.5928   4
   0  -4   4 816.223 45.6355   2
  -4   0  -4 970.085 44.3390   2
  -4   0  -4 923.851 39.9203   5
  -4   0  -4 998.410 46.0533   4
   0   4   4 955.975 47.7684   2
  -2   4   4 1173.71 53.6385   1
   2   4  -4 1181.17 53.2721   5
  -4  -2   4 1248.29 54.7802   4
  -4  -2   4 1133.06 53.9269   2
  -4   2  -4 1036.77 55.8431   2
   2  -4   4 1217.00 54.6422   2
  -2  -4  -4 1120.83 45.5952   4
  -2  -4  -4 1207.04 57.4467   3
  -4  -2   4 1230.53 54.7620   2
  -4  -2   4 1218.94 55.9124   3
   4   2   4 1212.48 52.6145   4
  -4   2  -4 1283.62 56.4754   4
   2  -4   4 1093.36 50.4466   3
  -2   4   4 1120.06 52.2739   2
  -4   2  -4 1204.38 54.1037   2
   4   2   4 1248.87 51.0595   5
  -2  -4  -4 1193.87 59.4324   2
   2   4  -4 1069.20 58.2593   2
   4   2   4 1195.40 55.0278   2
   4  -2  -4 1092.42 56.6011   4
  -4   2  -4 1174.06 57.6858   1
  -2   4   4 1242.66 52.6668   2
   2  -4   4 1160.48 55.6780   4
  -4  -2   4 1204.84 49.8384   5
  -4   2  -4 1110.44 45.3653   5
   2   4  -4 1297.82 60.6659   1
  -2   4   4 1235.97 53.8472   4
  -2  -4   4 1118.92 56.3072   2
  -2   4  -4 1178.33 55.1694   2
  -4   2   4 1294.59 58.0318   4
  -2   4  -4 1203.80 54.7766   2
   2   4   4 1191.66 57.2144   2
   4   2  -4 1147.05 46.0930   5
  -2   4  -4 1243.63 51.5091   5
  -2   4  -4 1080.45 60.4382   1
  -2  -4   4 1190.69 57.2292   3
  -4  -2  -4 1156.46 53.3575   3
   2   4   4 1202.95 53.7719   5
   2  -4  -4 1201.03 52.1095   2
  -4  -2  -4 1155.11 56.0723   2
  -4  -2  -4 1253.17 52.7436   4
   4   2  -4 1159.12 53.4005   2
   4  -2   4 1192.89 57.4795   4
   2  -4  -4 1120.47 52.8674   4
  -2   4  -4 1173.73 50.8577   3
   4  -2   4 1223.86 50.9410   2
  -4   4  -4 2264.05 93.5283   2
  -4   4   4 2180.62 88.9344   2
  -4   4  -4 2357.09 88.1390   3
  -4   4   4 2240.82 89.2098   2
  -4   4  -4 2266.83 100.017   1
  -4  -4  -4 2286.25 99.4894   2
   4   4   4 2243.48 98.6347   2
  -4  -4  -4 2338.46 96.9367   3
   4  -4  -4 2231.45 96.9090   4
  -4  -4  -4 2301.92 89.8653   4
   4  -4  -4 2254.31 87.4790   2
  -4  -4   4 2234.46 96.9529   2
  -4   4   4 2226.77 95.2510   1
   4   4   4 2296.61 93.9565   5
   4   4  -4 2284.50 97.8794   2
  -4   4  -4 2314.49 93.1082   2
   4   4  -4 2311.92 92.4479   5
  -4   4  -4 2254.85 88.1519   5
   4  -4   4 2208.62 98.0610   4
  -4  -4   4 2202.22 97.4337   3
  -5   1  -4 153.208 18.6468   2
  -5  -1   4 142.575 18.9109   2
  -5  -1   4 155.144 18.6054   3
  -5  -1   4 164.492 21.1097   4
  -5   1  -4 163.874 9.66862   5
   5   1   4 146.142 8.36973   5
  -5  -1   4 128.885 16.7321   2
   5   1   4 146.106 19.3869   4
   1   5  -4 164.471 21.5105   1
   5   1   4 166.533 19.3225   3
  -5   1  -4 206.591 20.9705   2
   1   5  -4 189.255 22.9127   5
  -1   5   4 163.563 16.6353   4
  -5  -1   4 160.770 9.29466   5
   5   1   4 162.429 18.6651   2
  -5   1  -4 157.401 10.0318   5
  -1   5   4 181.514 20.8938   2
  -1  -5  -4 138.604 22.9883   2
   5   1   4 160.527 8.46265   5
  -1  -5  -4 144.200 19.5966   3
   5  -1  -4 156.070 20.1428   4
   1   5  -4 133.853 20.6836   2
  -1  -5  -4 159.278 11.5466   4
   1  -5   4 166.210 20.7367   3
   1  -5   4 142.864 20.6349   2
  -1   5   4 161.991 19.6975   1
  -5   1  -4 143.345 10.8729   3
   5  -1   4 177.488 19.2000   2
   1   5   4 170.255 18.7384   1
  -1  -5   4 152.498 19.0456   3
  -5  -1  -4 131.033 18.9968   4
  -5   1   4 143.426 10.3900   2
  -5  -1  -4 148.901 16.7319   3
  -5   1   4 144.638 16.5108   3
   1  -5  -4 128.797 19.6259   2
  -1   5  -4 143.621 21.6522   2
   5   1  -4 158.184 15.6133   2
   5  -1   4 126.044 12.3177   3
   1  -5  -4 119.159 15.4509   4
  -5  -1  -4 144.138 18.7067   2
  -1   5  -4 169.252 26.0198   1
   1   5   4 143.064 22.7368   2
  -5   1   4 148.548 10.3749   2
   5  -1   4 216.529 26.2438   4
  -5  -1  -4 177.312 21.4152   2
  -1   5  -4 154.616 18.0346   5
  -5  -1  -4 166.572 14.8176   5
   5   1  -4 134.944 19.2486   4
  -1  -5   4 164.529 21.1293   2
   1  -5  -4 135.588 19.8241   3
   5  -3  -4 32.4424 17.4282   4
  -5   3  -4 3.42168 11.7930   2
  -5   3  -4 -7.8940 11.8571   2
  -5   3  -4 6.04667 3.65604   5
  -3   5   4 -1.5694 10.0715   2
  -5  -3   4 -0.4897 9.39497   5
  -3   5   4 0.89946 10.6033   2
   3  -5   4 -2.5494 15.0826   4
   5   3   4 -2.7138 8.85702   5
   5   3   4 -16.269 15.0276   2
   5   3   4 -13.823 10.6627   4
  -5   3  -4 14.2153 18.6226   1
   3   5  -4 -27.161 14.4392   1
  -5  -3   4 -2.4617 13.1437   4
   3   5  -4 8.76517 13.1842   5
  -3  -5  -4 12.8521 6.55826   4
  -5  -3   4 -1.8876 14.9697   3
  -3   5   4 0.91298 13.2130   1
   3  -5   4 5.22701 10.3326   3
  -3   5   4 15.9596 13.5992   4
  -5   3  -4 -0.0510 4.28069   3
   3   5  -4 7.75387 18.0630   2
  -3  -5  -4 4.96151 15.1610   2
  -5  -3   4 1.76306 14.2463   2
   3  -5   4 12.1532 10.6174   2
  -3  -5  -4 19.3921 17.1681   3
   3   5   4 7.95258 14.1495   5
  -5  -3  -4 1.15223 10.2473   4
   3  -5  -4 17.9286 13.8788   4
  -5   3   4 7.10143 4.80874   2
  -3   5  -4 1.99690 9.13936   5
   5  -3   4 -3.8774 16.8579   4
  -3   5  -4 -3.9562 13.3071   2
   5  -3   4 11.0257 5.95973   2
   3   5   4 17.6818 15.6753   2
  -3   5  -4 -5.1626 21.1919   1
  -5   3   4 -6.3282 4.53278   2
  -5  -3  -4 14.5966 13.8187   3
   3  -5  -4 7.37381 11.2204   2
  -5  -3  -4 3.53182 12.8686   2
   5   3  -4 31.0151 12.6941   2
   5   3  -4 8.34719 5.68795   5
  -3  -5   4 2.49031 14.1355   2
  -3  -5   4 19.6646 14.2626   3
   5   5   4 -0.2827 15.0593   2
  -5   5   4 -0.2856 13.5395   1
  -5  -5   4 -10.106 13.2487   2
  -5  -5  -4 -8.0414 9.09111   4
  -5  -5  -4 -6.2136 16.8734   3
  -5   5  -4 13.0826 11.6567   2
  -5   5  -4 8.75819 7.30655   3
  -5   5  -4 11.5988 7.13073   5
   5  -5  -4 -11.455 6.44128   2
   5   5  -4 14.9274 14.2381   2
   5   5  -4 5.19197 10.9547   5
   5  -5   4 9.57231 9.23472   2
  -5  -5  -4 0.27818 14.9590   2
   5  -5   4 7.32378 17.8432   4
  -5  -5   4 21.8012 17.9193   3
   5  -5  -4 -7.0890 13.2285   4
   5   5   4 -5.4908 12.0123   5
  -5   5   4 9.40452 9.76923   2
  -5   5  -4 -26.427 18.5448   1
  -5   5  -4 -7.9496 12.3840   2
  -6   0   4 745.329 33.3457   2
   0  -6   4 638.658 41.0167   2
   6   0   4 655.374 40.0405   4
   0   6  -4 761.670 47.2940   1
   0   6  -4 607.778 40.8207   2
  -6   0  -4 656.618 32.1128   5
   0   6   4 681.585 38.2208   1
   6   0   4 667.894 39.5747   2
  -6   0   4 656.711 32.7736   2
  -6   0  -4 747.224 37.1432   2
  -6   0  -4 646.783 36.8678   2
   0   6   4 697.538 43.4599   2
  -6   0  -4 652.968 32.6804   3
   0   6  -4 667.694 39.3127   5
   0  -6  -4 648.083 32.4294   4
  -6   0  -4 749.568 31.3860   5
  -6   0   4 646.304 35.8177   3
   6   0  -4 647.917 40.9432   4
   0  -6  -4 598.986 39.2210   3
   6   0   4 764.314 33.7917   3
   0  -6  -4 742.361 42.0150   2
   0  -6   4 713.777 41.2040   3
   6   0  -4 687.068 30.9643   2
   2   6  -4 1104.47 55.2354   5
  -2   6   4 1092.57 52.0361   4
  -6  -2   4 1130.48 47.6170   5
   6   2   4 1134.18 54.5078   4
  -2   6   4 1116.08 54.8944   2
   2   6  -4 1133.87 60.4393   2
  -2   6   4 1145.38 54.1854   1
   2   6  -4 1070.26 58.2528   1
  -2  -6  -4 1052.54 59.9287   2
  -6  -2   4 1168.88 53.3184   2
  -6   2  -4 1111.30 54.4962   2
   2  -6   4 1075.64 52.3113   3
  -6  -2   4 1099.03 54.5993   3
   6  -2  -4 1080.96 56.7414   4
   6   2   4 1150.08 54.8873   2
   2  -6   4 1028.96 54.5514   4
   2  -6   4 1010.03 53.6072   2
   6   2   4 1055.98 44.2417   5
  -6   2  -4 1111.95 43.7384   3
  -6  -2   4 1069.36 52.6162   2
  -2  -6  -4 1067.01 57.6826   3
  -6   2  -4 1181.47 53.9630   2
   6   2  -4 1095.65 51.3526   2
   2  -6  -4 1091.19 53.1183   2
  -2   6  -4 1094.72 56.7428   2
  -2  -6   4 1006.74 55.3661   3
  -2  -6   4 1120.20 59.8647   2
  -6  -2  -4 1204.81 55.5114   4
   2  -6  -4 1033.87 51.2174   4
  -6   2   4 1135.81 43.5070   2
  -6  -2  -4 1155.85 54.4141   2
  -6  -2  -4 1207.28 50.8108   5
   6  -2   4 1052.96 58.4325   4
  -6  -2  -4 1112.35 52.1973   3
  -6   2   4 1098.04 50.6618   3
  -2   6  -4 1077.30 52.1439   5
   2   6   4 1115.96 54.0573   5
  -6   2   4 1096.16 43.1365   2
  -2   6  -4 1058.65 63.0937   1
   2   6   4 1115.67 59.9631   2
  -6   4  -4 989.990 39.2591   3
  -4  -6  -4 989.694 41.7885   4
   4   6  -4 907.141 53.4191   2
  -6   4  -4 920.436 47.2256   2
  -4   6   4 998.894 47.7194   2
   6   4   4 915.838 46.6558   4
  -6   4  -4 949.008 38.5290   5
   4  -6   4 960.907 48.2756   2
  -6  -4   4 946.542 51.0778   2
  -6   4  -4 1035.09 55.7221   1
  -4   6   4 1056.54 53.8920   1
   6  -4  -4 828.522 51.6169   4
   6   4   4 993.989 52.2796   2
   4   6  -4 989.052 49.9074   5
  -6   4  -4 962.236 46.3609   2
  -4  -6  -4 1015.52 55.2064   3
   4  -6   4 977.484 52.0412   4
   6   4   4 966.763 45.5995   5
  -4   6   4 1023.91 47.0282   2
  -4  -6  -4 941.495 55.1843   2
  -6  -4   4 934.415 50.8374   3
  -4   6  -4 889.335 60.2527   1
  -4   6  -4 1005.47 44.9849   5
  -6  -4  -4 958.580 48.0332   4
  -6  -4  -4 914.742 53.8234   2
   4   6   4 948.934 49.1562   5
   4  -6  -4 964.779 51.7085   4
   4  -6  -4 921.407 44.5526   2
   6  -4   4 896.721 52.7462   4
   6   4  -4 1011.90 52.2268   2
  -6   4   4 990.668 40.4074   2
  -4  -6   4 933.564 54.1887   3
  -6   4   4 887.081 49.9115   1
   6   4  -4 974.584 42.8321   5
  -6   4   4 978.762 40.2657   2
  -6  -4  -4 1000.58 52.0336   3
   4   6   4 900.592 53.6978   2
  -4   6  -4 961.534 49.7406   2
  -4  -6   4 945.903 53.7622   2
   6   6   4 1157.72 63.9370   2
  -6  -6   4 1161.53 63.0530   3
  -6  -6  -4 1294.10 68.0075   2
  -6   6   4 1261.31 54.7824   2
   6  -6   4 1200.01 64.4631   4
   6  -6   4 1192.13 55.0994   2
   6   6  -4 1232.00 57.9631   5
  -6   6   4 1223.89 64.4719   1
   6   6   4 1235.28 59.1749   5
  -6  -6  -4 1261.46 63.9787   3
  -6  -6   4 1287.14 66.7586   2
  -6   6  -4 1240.27 70.0884   1
   6   6  -4 1167.56 63.1531   2
  -6   6  -4 1210.33 58.6092   2
   6  -6  -4 1208.91 50.5352   2
  -6   6  -4 1242.24 58.1990   2
  -6   6  -4 1195.41 52.3304   5
   6  -6  -4 1216.87 64.7595   4
  -6   6  -4 1333.91 56.6959   3
  -6  -6  -4 1305.33 55.7759   4
  -6   6   4 1195.24 54.5773   2
   7  -1  -4 23.1432 16.5103   4
   1   7  -4 39.1614 14.3031   5
  -1  -7  -4 4.39021 14.7968   2
  -7   1  -4 26.6896 5.55080   5
   1  -7   4 46.5048 17.8049   2
   7   1   4 23.5122 12.5710   2
   1   7  -4 26.9186 19.7100   1
   1   7  -4 28.6893 17.1630   2
  -7   1  -4 36.9333 11.2965   2
  -1  -7  -4 -1.3337 14.0081   3
  -7  -1   4 22.8760 11.6827   2
   1  -7   4 25.1952 13.2730   3
  -1  -7  -4 26.6485 8.33443   4
  -1   7   4 27.2934 16.5669   2
  -1   7   4 34.9220 13.6064   1
   7   1   4 60.6296 17.9197   4
  -7   1  -4 34.9051 11.7907   2
  -7   1  -4 15.3085 7.51790   3
  -7  -1   4 32.0356 5.30553   5
  -7   1  -4 26.7124 6.13041   5
  -7  -1   4 40.6957 11.1873   2
  -7  -1   4 38.7802 13.6297   3
  -7  -1  -4 21.3072 12.6581   2
   1   7   4 51.5998 16.3787   5
   1  -7  -4 16.4557 11.1545   4
   1  -7  -4 14.5261 16.9714   3
  -1   7  -4 27.0465 17.3471   1
  -7  -1  -4 26.3159 8.44480   5
   1   7   4 17.2836 14.7113   1
   7  -1   4 5.69204 6.45404   2
   1  -7  -4 55.2889 17.6747   2
   1   7   4 23.8601 18.7724   2
  -1  -7   4 40.3826 16.5154   2
  -7  -1  -4 38.4200 14.0249   2
   7  -1   4 37.0077 15.6675   4
  -7  -1  -4 29.0069 10.4292   3
  -1  -7   4 46.0276 15.5232   3
  -7   1   4 22.6457 7.35304   2
  -1   7  -4 20.0898 15.1527   2
  -1   7  -4 18.2846 12.2329   5
  -7   1   4 25.4555 7.63957   2
   7   1  -4 17.1440 17.6606   4
  -7   1   4 22.8970 10.4314   3
  -7   3  -4 20.8733 16.7530   1
   3  -7   4 18.9884 14.4522   2
  -7   3  -4 22.6656 15.4017   2
   3  -7   4 27.9416 13.6278   4
  -3   7   4 19.3083 16.1879   1
  -3   7   4 36.2466 15.2231   2
   7   3   4 29.8889 14.7141   4
   3   7  -4 10.3740 15.1438   5
   7   3   4 6.74050 3.22740   5
  -3  -7  -4 28.8537 16.9254   2
  -7  -3   4 4.16531 13.5335   2
  -3  -7  -4 2.61517 17.8871   3
   3   7  -4 8.69582 20.5444   1
  -7  -3   4 15.9796 10.7711   5
  -7  -3   4 25.3615 15.5916   3
  -7   3  -4 19.5601 5.45256   3
   3   7  -4 39.5707 17.1978   2
   3  -7   4 38.6440 14.3609   3
   7  -3  -4 31.0384 19.6632   4
  -7   3  -4 17.9213 14.6479   2
   7   3   4 25.6243 16.3180   2
   7  -3   4 19.3377 8.70578   2
  -3   7  -4 24.9684 15.9288   2
  -7  -3  -4 32.3804 14.2064   2
  -3  -7   4 14.5765 14.9564   3
  -7  -3  -4 31.8127 12.1573   3
   7  -3   4 24.7587 16.7670   4
  -7   3   4 21.6715 5.45130   2
   3   7   4 -19.677 19.0011   2
   3   7   4 38.9455 16.8894   5
   3  -7  -4 22.3136 13.5358   2
   7   3  -4 2.99080 13.2105   2
  -3   7  -4 -13.727 21.8359   1
  -3   7  -4 13.4593 12.2239   5
   3  -7  -4 11.1635 13.8187   4
  -3  -7   4 31.2849 16.8607   2
  -7   3   4 9.13352 6.01176   2
   7  -5  -4 9.36774 15.0778   4
  -7   5  -4 -23.016 17.7645   1
   5  -7   4 -3.3663 13.4557   4
  -7   5  -4 6.10981 5.50482   5
  -5   7   4 3.45599 10.7308   2
   5   7  -4 5.65970 15.8392   2
  -5   7   4 3.75978 16.5827   1
  -7   5  -4 -0.3094 11.7072   2
  -7   5  -4 12.6312 10.7020   2
   7   5   4 22.2001 10.8297   5
  -5  -7  -4 -26.254 17.8230   3
  -5  -7  -4 13.7527 16.2261   2
  -7   5  -4 9.81732 5.82298   3
  -7  -5   4 7.38685 17.2983   3
   5  -7   4 -0.7524 11.0617   2
  -7  -5   4 3.79350 17.0413   2
   5   7  -4 11.2141 13.6148   5
  -5  -7  -4 11.3908 9.07245   4
   7   5   4 9.94727 18.0067   2
  -7  -5  -4 25.8818 15.2523   2
  -5   7  -4 11.9042 13.6757   2
   5   7   4 0.88317 16.0160   2
  -7   5   4 18.2635 15.6974   1
   5  -7  -4 6.78002 6.69335   2
   7   5  -4 7.70055 8.46625   5
   7   5  -4 -19.293 12.7080   2
  -7   5   4 -0.9923 7.39831   2
   5   7   4 10.3990 14.9095   5
   5  -7  -4 -5.8765 12.4555   4
   7  -5   4 1.50315 7.63042   2
  -5   7  -4 17.3983 23.2922   1
  -7   5   4 12.2249 6.94658   2
  -5  -7   4 2.01669 16.0452   2
   7  -5   4 13.1993 15.2551   4
  -7  -5  -4 -23.705 15.2080   3
  -5   7  -4 15.9685 10.7321   5
  -5  -7   4 25.9756 15.9019   3
  -7   7  -4 26.4459 10.2473   5
  -7   7   4 8.76839 17.5279   1
   7   7  -4 17.2557 12.2188   5
   7   7   4 -12.382 11.3720   5
  -7  -7   4 24.2035 16.5690   2
   7  -7  -4 25.7003 19.4666   4
  -7  -7   4 2.85566 14.2898   3
  -7  -7  -4 8.36622 10.6757   4
  -7   7  -4 17.3235 22.0824   1
  -7   7   4 2.13150 10.7318   2
  -7   7   4 -8.5661 10.4581   2
   7   7   4 -7.0976 15.7713   2
   7  -7   4 -14.048 17.7755   4
  -7  -7  -4 39.7656 17.7358   3
  -7   7  -4 11.2017 13.8612   2
  -7   7  -4 2.88123 13.3097   2
  -7  -7  -4 13.7854 20.0704   2
   7   7  -4 -21.904 14.8195   2
  -8   0  -4 299.597 21.8783   3
  -8   0   4 330.864 22.1087   2
   0   8  -4 274.651 34.6878   2
   0  -8   4 322.631 32.1075   3
   0   8  -4 353.379 33.8725   1
  -8   0  -4 346.709 19.4524   5
   0  -8  -4 288.324 21.5173   4
  -8   0  -4 323.264 26.3317   2
  -8   0  -4 367.395 27.7672   2
   8   0  -4 279.071 34.2129   4
   8   0   4 366.222 29.4945   2
   8   0  -4 345.338 20.4044   2
  -8   0   4 259.541 24.9290   3
   0  -8  -4 306.717 32.6450   3
   8   0   4 343.172 34.0064   4
  -8   0  -4 328.188 21.8555   5
   0  -8   4 365.063 35.2769   2
   0   8   4 385.836 30.3370   1
   0   8  -4 302.429 29.4868   5
   0   8   4 372.162 34.6738   2
   0   8   4 318.648 28.3517   5
  -8   0   4 332.298 22.8794   2
   0  -8  -4 346.669 34.0037   2
  -8   2  -4 920.502 39.9582   3
  -2  -8  -4 921.211 55.0789   3
   2   8  -4 929.883 50.7226   5
   2  -8   4 886.061 49.9627   3
  -2  -8  -4 928.486 55.6343   2
  -8   2  -4 950.876 37.6548   5
  -8   2  -4 960.462 37.7376   5
   2   8  -4 882.629 54.6901   1
   8   2   4 1055.00 54.0568   4
   2  -8   4 938.688 53.2022   2
   8   2   4 949.446 49.5977   2
  -8   2  -4 1000.88 49.5457   2
   8  -2  -4 929.085 56.5552   4
  -8  -2   4 1028.79 49.2889   2
  -8  -2   4 1010.72 49.0279   2
  -2  -8  -4 921.470 40.5966   4
  -2   8   4 925.674 53.1253   2
  -8   2  -4 1000.44 47.5069   2
  -2   8   4 1005.85 51.8726   1
   2   8  -4 943.809 57.7895   2
   2  -8   4 897.657 50.6355   4
  -8  -2   4 987.527 43.0394   5
  -8  -2   4 919.597 48.9237   3
  -2   8  -4 943.544 52.8368   2
  -8   2   4 968.670 39.8061   2
  -8   2   4 969.101 45.9080   3
   2   8   4 984.142 53.0477   1
  -2   8  -4 949.738 50.0178   5
   2   8   4 930.844 51.9821   5
  -8  -2  -4 929.469 47.7495   3
   8  -2   4 865.477 55.5890   4
   8   2  -4 949.285 46.8771   2
  -8  -2  -4 1012.25 51.8461   2
   2  -8  -4 958.109 48.6282   4
   2  -8  -4 895.947 51.7888   2
   8  -2   4 969.052 43.4925   2
  -8  -2  -4 1030.63 46.2458   5
  -2   8  -4 942.959 60.0168   1
  -2  -8   4 948.806 55.2646   2
  -2  -8   4 881.843 52.5825   3
   2   8   4 939.049 55.1565   2
  -8   2   4 924.093 40.1600   2
  -8   4  -4 683.459 47.8860   1
  -8   4  -4 736.422 30.0797   3
   4  -8   4 701.259 40.2319   3
  -8  -4   4 696.954 44.2672   2
   4   8  -4 729.772 50.8144   2
  -4  -8  -4 635.623 47.5307   2
   8  -4  -4 698.227 48.7661   4
   4  -8   4 757.472 42.7522   2
  -4   8   4 767.120 42.7282   2
   8   4   4 728.413 42.4793   4
  -8   4  -4 665.231 44.1811   2
  -4   8   4 636.004 45.0485   1
  -4  -8  -4 668.747 45.8961   3
  -8   4  -4 741.261 40.1620   2
   8   4   4 753.193 45.7185   2
   4  -8   4 701.777 45.2182   4
  -8   4  -4 669.919 28.1132   5
  -8  -4   4 769.480 43.9757   3
  -8   4  -4 740.627 30.0976   3
   4   8  -4 632.773 41.0679   5
   4   8  -4 662.550 51.2346   1
  -4  -8  -4 699.851 32.2964   4
  -4  -8   4 698.703 47.5854   2
  -4   8  -4 653.057 38.8355   5
  -4   8  -4 769.333 57.4977   1
  -4  -8   4 738.204 48.8144   3
  -4   8  -4 708.391 42.6828   2
   4   8   4 723.670 42.9246   5
  -8   4   4 731.403 30.5757   2
   4  -8  -4 782.596 44.4257   4
   8  -4   4 667.014 49.0190   4
   4  -8  -4 745.732 40.4919   2
  -8  -4  -4 704.557 44.4895   2
   4   8   4 708.243 51.1030   2
  -8  -4  -4 702.675 43.2445   3
  -8   4   4 681.193 32.8889   2
   8   4  -4 698.942 42.2923   2
  -8   6  -4 1133.02 46.9512   5
   6  -8   4 1156.11 54.3918   2
  -6  -8  -4 1173.57 49.9234   4
  -6  -8  -4 989.597 60.7069   3
   6   8  -4 1073.46 62.3082   2
   8   6   4 1162.37 53.5653   5
   6   8  -4 1169.05 57.4095   5
  -8   6  -4 1170.88 46.4206   3
  -6  -8  -4 1193.63 65.3335   2
  -6   8   4 1144.36 54.3037   2
  -8   6  -4 1082.70 53.1460   2
  -6   8   4 1082.39 54.1790   2
  -6   8   4 964.814 62.2949   1
   6  -8   4 1057.82 62.5563   4
  -8  -6   4 1116.20 62.9246   2
   8  -6  -4 1084.60 64.1498   4
  -8   6  -4 1097.50 67.1604   1
  -8   6  -4 1159.42 55.0379   2
   8   6   4 1081.32 62.3944   2
  -8  -6   4 976.309 59.1561   3
   6  -8  -4 1086.71 61.2964   4
  -6  -8   4 1086.84 65.3868   2
  -6   8  -4 1102.39 56.9843   2
   8   6  -4 1167.59 50.7347   5
   8  -6   4 1135.55 63.2095   4
   6   8   4 1060.98 57.7797   5
  -6   8  -4 958.235 66.2622   1
  -6   8  -4 1048.26 51.3915   5
  -8  -6  -4 1071.00 63.7584   2
   6   8   4 1086.01 65.4233   2
   8   6  -4 1046.39 60.5890   2
  -8   6   4 1121.01 61.5889   1
   8  -6   4 1154.17 49.3051   2
  -8  -6  -4 1081.95 60.8897   3
  -8   6   4 1096.23 48.0233   2
  -8   6   4 1082.41 48.3378   2
  -6  -8   4 1106.39 63.7186   3
   8  -8   4 694.826 52.4591   4
  -8  -8  -4 707.703 52.1452   3
  -8  -8  -4 629.291 50.1932   2
  -8  -8   4 705.248 49.5868   3
   8  -8  -4 731.293 52.3212   4
  -8   8  -4 729.948 59.6738   1
   8   8  -4 752.876 50.2834   2
   8   8   4 757.937 53.5317   2
  -8   8  -4 793.770 39.1778   5
   8   8   4 870.061 45.0935   5
  -8   8   4 772.707 40.2896   2
  -8  -8   4 737.513 51.1603   2
  -8   8   4 779.211 53.6207   1
  -8   8  -4 749.742 44.0803   2
   8   8  -4 716.391 40.9889   5
  -9  -1   4 5.12617 5.61155   5
  -1  -9  -4 11.8315 14.4290   3
  -9   1  -4 -2.7997 7.00093   3
  -9  -1   4 7.80399 13.2981   3
   1   9  -4 -2.2201 15.7726   5
   9   1   4 7.70939 11.6068   2
  -9   1  -4 2.83478 10.8865   2
   9  -1  -4 -18.090 19.3050   4
  -9   1  -4 -1.6050 6.31447   5
  -1   9   4 3.21389 14.4190   2
  -1  -9  -4 1.51833 8.04641   4
   1  -9   4 23.6131 18.1186   2
  -1   9   4 8.50356 11.8891   5
  -9   1  -4 8.21984 5.78433   5
  -1  -9  -4 16.1156 19.9249   2
  -1   9   4 -22.831 13.6341   1
   1  -9   4 -7.2618 15.1493   3
   1   9  -4 3.20449 15.1822   1
   9   1   4 -14.312 16.4507   4
   1   9  -4 0.39929 15.9565   2
  -9  -1   4 -5.5147 10.9305   2
  -9  -1   4 -0.0231 10.8161   2
  -9   1  -4 4.76783 12.3135   2
   1  -9   4 6.31007 14.9105   4
  -9  -1  -4 -2.1227 12.3216   2
  -1   9  -4 29.5191 18.2280   1
  -9   1   4 1.55890 7.21102   2
   1   9   4 -7.0407 15.0045   5
  -1  -9   4 18.1529 18.1606   3
  -9  -1  -4 -1.4556 8.05737   5
   1  -9  -4 9.21475 13.5235   2
   1   9   4 5.24247 15.0666   1
   9   1  -4 -24.560 16.6458   4
  -1  -9   4 20.6016 19.3539   2
   9  -1   4 -7.9012 7.46343   2
   1  -9  -4 3.22321 10.8069   4
  -9   1   4 2.59186 7.71793   2
  -9   1   4 14.3573 10.7428   3
  -1   9  -4 6.96503 15.6145   2
   9   1  -4 -7.3765 6.76495   2
   1   9   4 15.0913 19.5670   2
  -1   9  -4 6.58628 14.8184   5
  -9  -1  -4 -0.2207 10.4784   3
   9  -1   4 1.82979 14.7800   4
   1  -9  -4 -10.189 16.0580   3
  -3   9   4 32.4571 16.1530   2
  -9   3  -4 22.8308 17.2602   1
   3  -9   4 42.9311 14.9789   3
   9  -3  -4 58.9348 21.2476   4
  -9  -3   4 22.0881 15.2315   3
   3   9  -4 21.4334 17.0671   5
  -9   3  -4 11.3166 5.67978   3
   9   3   4 30.4739 17.1396   4
  -3  -9  -4 4.49044 16.8715   2
   9   3   4 14.7819 14.5117   2
  -3  -9  -4 10.1962 18.4630   3
   3  -9   4 22.4255 13.2573   4
  -9   3  -4 19.6951 15.5893   2
  -3   9   4 16.3138 16.4333   1
  -9   3  -4 28.6209 4.40818   5
   3   9  -4 16.3918 17.7978   1
  -9  -3   4 10.9731 8.73328   5
   3  -9   4 26.1444 13.9680   2
  -9   3  -4 19.7311 11.9899   2
  -9  -3   4 24.1643 14.2227   2
   3   9  -4 38.0695 18.3974   2
   3   9   4 37.8491 21.3967   2
  -9   3   4 20.5437 10.2499   3
   3   9   4 13.5740 13.8399   5
   3  -9  -4 14.6071 14.4144   2
   3  -9  -4 0.95372 13.0821   4
  -3  -9   4 -5.0893 15.1723   3
  -3   9  -4 19.2360 22.8325   1
  -9   3   4 10.0159 7.24164   2
   9  -3   4 10.4099 16.9055   4
   9   3  -4 14.7338 12.1385   2
  -9   3   4 19.5323 6.00916   2
  -3   9  -4 15.3950 14.2377   5
  -9  -3  -4 17.9586 14.0157   3
   9  -3   4 14.2159 7.77832   2
  -3  -9   4 29.8973 21.5434   2
  -9  -3  -4 26.9123 16.0562   2
  -3   9  -4 17.8268 17.4035   2
   5  -9   4 10.3445 17.2583   4
  -9   5  -4 9.20902 12.9226   2
  -9  -5   4 1.41918 16.3526   2
   5   9  -4 -20.358 14.3775   5
   9   5   4 -1.3489 5.27470   5
   9   5   4 23.7406 17.5740   2
   5   9  -4 21.7780 21.7665   2
   9  -5  -4 -25.834 18.5200   4
  -5  -9  -4 21.0676 22.1439   2
  -9   5  -4 16.5485 18.2375   1
  -9   5  -4 38.6032 16.3769   2
  -5  -9  -4 7.62400 7.41410   4
  -9   5  -4 1.12618 4.81511   3
   5  -9   4 -13.322 12.2719   2
  -5   9   4 11.8280 13.6321   2
  -9   5  -4 17.2507 5.74254   3
  -5  -9  -4 12.7389 17.3969   3
  -9   5  -4 -0.1261 4.78548   5
  -5   9   4 -11.957 16.8217   1
  -9  -5   4 -2.3808 16.1514   3
  -9  -5  -4 0.16982 16.3093   3
  -9   5   4 0.64682 5.91102   2
  -5   9  -4 20.6141 20.3048   1
   5   9   4 25.7487 14.3118   5
   9   5  -4 -19.583 14.0278   2
  -5  -9   4 1.70931 17.5839   2
   5  -9  -4 23.3201 12.1761   2
  -5   9  -4 15.1314 15.4613   2
  -9   5   4 11.3108 9.11849   2
  -9   5   4 42.3009 18.9636   1
  -5   9  -4 -4.3364 11.7459   5
  -5  -9   4 2.73306 18.8435   3
  -9  -5  -4 40.5911 19.5421   2
   5   9   4 -10.079 17.6747   2
   9  -5   4 18.8793 17.4813   4
   5  -9  -4 18.0931 16.8759   4
   9   7   4 17.3224 11.6442   5
   9   7   4 43.0299 21.6249   2
   7  -9   4 18.6317 19.3690   4
  -7  -9  -4 -17.248 21.4784   2
  -7   9   4 34.2565 20.9373   1
  -9   7  -4 -26.225 22.6219   1
   7   9  -4 -10.268 21.1379   2
  -7  -9  -4 -4.7722 20.4134   3
  -9  -7   4 16.4011 19.7569   3
  -9   7  -4 5.13250 7.86945   5
  -9   7  -4 -1.4230 12.2206   2
  -9  -7   4 13.9399 19.6880   2
   9  -7  -4 20.9248 21.2302   4
  -7   9   4 0.89323 11.1273   2
   7   9  -4 -5.5344 13.2082   5
   7   9   4 17.0151 22.7510   2
  -9   7   4 4.40915 19.0398   1
  -9  -7  -4 21.5930 20.6746   2
  -7   9  -4 -17.293 13.1351   2
  -7  -9   4 49.9021 23.8591   2
  -9  -7  -4 -5.2342 18.2564   3
   7   9   4 -4.3600 12.3519   5
  -9   7   4 9.34757 9.27654   2
   9  -7   4 41.4619 22.8904   4
  -7   9  -4 47.8441 24.9441   1
   9   7  -4 2.57752 14.8317   2
  -7   9  -4 7.88890 12.2444   5
   7  -9  -4 49.3982 21.0854   4
  -7  -9   4 -19.341 14.9566   3
  -9  -9   4 -16.088 16.1193   3
   9   9   4 17.1576 13.6789   5
  -9  -9  -4 -12.546 21.8057   2
  -9  -9   4 17.7290 19.0492   2
   9   9  -4 19.8472 18.6792   2
   9   9   4 11.1362 18.5412   2
   9  -9  -4 -18.554 20.9610   4
  -9   9   4 5.66818 10.5297   2
  -9   9  -4 -15.981 25.5470   1
  -9   9   4 -3.7131 21.7746   1
  -9   9  -4 -5.7815 10.6498   5
  -9  -9  -4 -11.039 15.8237   3
  -9   9  -4 -5.7372 14.7490   2
   9  -9   4 10.3425 18.0674   4
   0  10  -4 826.511 53.4664   1
  10   0  -4 794.768 52.8433   4
 -10   0  -4 862.562 44.0555   5
   0  10   4 826.014 52.4384   2
   0  10   4 857.023 50.3180   5
 -10   0  -4 999.984 47.7751   2
   0 -10   4 800.492 49.9078   3
 -10   0   4 855.245 45.1967   3
 -10   0  -4 865.203 41.9461   3
 -10   0  -4 844.208 39.9835   5
   0 -10  -4 807.302 41.5983   4
 -10   0   4 865.611 42.4093   2
   0  10  -4 893.672 51.5271   5
  10   0   4 827.880 54.4497   4
   0 -10  -4 829.371 52.5568   2
   0 -10  -4 846.205 52.2620   3
   0  10  -4 881.737 54.4469   2
   0  10   4 829.426 50.2666   1
 -10   0   4 966.310 43.6744   2
   0 -10   4 847.914 55.7391   2
 -10   0  -4 881.850 46.5763   2
   2 -10   4 539.127 36.8443   4
  10   2   4 563.203 35.1144   2
  -2  10   4 449.993 36.9239   2
   2 -10   4 423.197 36.4017   3
 -10   2  -4 512.153 25.4801   3
   2  10  -4 432.479 44.4043   1
  -2 -10  -4 459.301 38.5470   3
 -10   2  -4 520.892 31.6311   2
 -10   2  -4 453.884 36.0968   2
  10   2   4 489.780 40.7367   4
 -10  -2   4 456.603 32.9757   2
 -10   2  -4 524.854 24.0835   5
   2 -10   4 578.825 41.8243   2
  -2  10   4 472.348 37.2453   1
  10  -2  -4 478.528 40.3402   4
  -2 -10  -4 544.828 42.5813   2
  -2 -10  -4 492.816 26.5507   4
 -10  -2   4 524.142 28.0528   5
 -10  -2   4 514.867 35.7785   3
   2  10  -4 588.998 40.3776   5
  -2  10   4 465.340 33.0506   5
   2  10  -4 532.123 45.8584   2
 -10  -2   4 486.130 34.7710   2
 -10   2   4 515.475 25.2896   2
   2 -10  -4 518.174 39.7911   2
  -2 -10   4 545.910 42.6750   2
  -2  10  -4 481.662 46.4851   1
 -10   2   4 482.041 26.5038   2
  10  -2   4 525.625 27.2778   2
 -10  -2  -4 485.565 32.9198   3
  -2 -10   4 415.202 41.3978   3
 -10   2   4 495.521 30.5190   3
  -2  10  -4 482.448 36.7325   5
 -10  -2  -4 485.839 36.5095   2
   2  10   4 409.989 34.4838   5
   2  10   4 481.474 41.5182   2
   2 -10  -4 490.209 33.7029   4
   2  10   4 461.839 39.4636   1
  -2  10  -4 494.223 39.0069   2
  10  -2   4 479.949 40.2285   4
 -10   4  -4 700.213 40.0632   2
   4  10  -4 792.335 51.6705   2
 -10   4  -4 718.926 44.3072   2
  10   4   4 720.690 44.5353   2
  -4 -10  -4 749.464 54.8927   2
  -4  10   4 634.592 46.1611   1
  10   4   4 615.987 43.8667   4
 -10   4  -4 704.734 29.1866   3
   4  10  -4 712.431 53.6744   1
  -4 -10  -4 631.677 46.9495   3
 -10  -4   4 728.350 45.7596   3
   4 -10   4 706.807 44.6248   2
  -4  10   4 592.154 38.4249   5
 -10   4  -4 690.323 28.7050   5
  10  -4  -4 664.670 48.4788   4
 -10  -4   4 638.642 43.8071   2
  -4  10   4 659.822 42.4243   2
   4  10  -4 669.636 45.0872   5
   4 -10   4 648.250 44.9444   4
   4 -10   4 675.023 41.8554   3
 -10   4  -4 611.866 49.4776   1
 -10   4   4 716.744 29.9994   2
   4  10   4 685.917 43.6588   5
   4 -10  -4 760.566 45.8647   4
  -4  10  -4 684.476 41.9478   5
 -10   4   4 696.804 36.6113   3
  -4  10  -4 658.060 46.1118   2
  -4 -10   4 694.637 49.7559   2
   4  10   4 714.791 50.3942   2
 -10  -4  -4 631.837 45.5338   2
 -10  -4  -4 639.940 42.8541   3
  -4  10  -4 631.142 54.1523   1
 -10   4   4 639.337 29.5983   2
   4 -10  -4 669.708 42.1778   2
  -4 -10   4 703.177 50.3134   3
  10  -4   4 637.129 50.3005   4
  10   4  -4 645.943 40.8891   2
 -10   6  -4 508.337 24.6300   5
   6 -10   4 454.384 41.7847   4
  -6 -10  -4 499.062 45.1901   3
   6  10  -4 480.049 38.1105   5
  10   6   4 493.532 41.1764   2
  -6  10   4 449.941 34.9111   2
 -10   6  -4 480.860 30.8756   2
   6 -10   4 452.461 34.1285   2
 -10   6  -4 496.961 44.8114   1
  10  -6  -4 457.821 41.7819   4
 -10  -6   4 422.004 37.8905   2
  -6  10   4 474.965 44.1761   1
   6  10  -4 460.267 42.6753   2
  -6 -10  -4 444.746 43.5374   2
 -10  -6   4 483.572 40.8069   3
  -6 -10   4 465.416 41.4613   3
  -6  10  -4 430.467 37.3619   2
  -6  10  -4 375.515 46.3103   1
   6  10   4 489.460 38.8899   5
  -6 -10   4 579.086 48.7263   2
  10   6  -4 505.006 39.2744   2
 -10   6   4 563.785 45.4427   1
   6  10   4 465.851 43.4021   2
  10  -6   4 493.370 42.3984   4
 -10  -6  -4 477.794 42.9319   2
 -10   6   4 513.629 24.7447   2
  -6  10  -4 477.327 33.1903   5
 -10  -6  -4 484.607 40.1930   3
   6 -10  -4 564.360 40.9281   4
  10  -8  -4 419.300 44.6899   4
 -10   8  -4 467.724 27.8675   5
  -8 -10  -4 454.782 41.2611   3
  -8 -10  -4 442.528 47.1499   2
   8  10  -4 419.267 45.1868   2
   8 -10   4 497.599 43.8689   4
 -10  -8   4 492.952 44.2669   3
   8  10  -4 478.958 34.5737   5
 -10  -8   4 451.298 43.6085   2
  -8  10   4 455.787 33.5069   2
 -10   8  -4 436.151 31.9173   2
 -10   8  -4 497.212 51.8772   1
  10   8   4 396.445 42.4221   2
  -8  10   4 380.662 46.0457   1
   8 -10  -4 511.000 43.9262   4
  -8  10  -4 526.248 38.2034   2
 -10  -8  -4 437.711 39.3540   3
 -10   8   4 456.337 42.5772   1
 -10   8   4 453.772 27.2113   2
  -8  10  -4 423.233 31.9729   5
  -8 -10   4 415.197 44.1071   3
  -8 -10   4 543.166 48.7960   2
  10   8  -4 432.493 41.6644   2
   8  10   4 401.449 46.4634   2
  10  -8   4 452.941 42.8107   4
 -10  -8  -4 407.947 40.6104   2
  -8  10  -4 409.164 54.4289   1
   8  10   4 502.242 37.4966   5
 -10  10   4 605.211 37.3445   2
  10  10   4 636.175 50.0135   2
  10  10  -4 576.701 48.0986   2
  10 -10  -4 615.885 49.4027   4
  10 -10   4 586.146 49.2658   4
 -10  10   4 627.100 57.0755   1
 -10  10  -4 642.840 41.3314   2
 -10  10  -4 602.562 36.7169   5
 -10 -10  -4 643.714 51.4648   2
 -10 -10   4 577.341 51.9271   3
 -10  10  -4 613.907 56.7536   1
 -10 -10   4 633.635 50.3061   2
 -10 -10  -4 608.991 51.2817   3
 -11  -1   4 -8.0658 13.2646   3
   1 -11   4 -2.4429 15.8243   2
 -11   1  -4 -6.5706 7.97196   3
  -1 -11  -4 -3.9572 9.55240   4
  -1  11   4 15.5322 16.7323   2
   1 -11   4 -5.8673 15.5179   4
   1 -11   4 5.86103 17.2088   3
 -11  -1   4 -0.0623 11.8925   2
   1  11  -4 -2.5849 12.8816   5
  -1  11   4 -9.8606 15.2393   1
  -1  11   4 32.1712 16.6498   5
  -1 -11  -4 30.8215 17.6261   2
  11   1   4 -5.7939 19.0720   4
 -11   1  -4 -1.5249 11.1126   2
  11   1   4 4.23093 13.8250   2
   1  11  -4 -14.124 16.6967   1
  -1 -11  -4 4.63123 16.0548   3
   1  11  -4 0.22473 20.7819   2
  11  -1  -4 6.47308 17.3794   4
 -11   1  -4 -5.0267 8.85712   5
 -11  -1  -4 10.9589 10.2067   3
   1  11   4 -1.1972 16.4287   1
  11  -1   4 50.0091 22.5507   4
   1 -11  -4 9.39770 18.9045   2
  -1  11  -4 31.8337 17.1859   5
  11   1  -4 19.0203 16.9050   4
   1  11   4 12.7199 21.3588   2
   1 -11  -4 -19.191 17.6168   3
  -1  11  -4 14.2146 16.4204   2
   1  11   4 -7.6438 16.4649   5
 -11   1   4 2.72629 10.1347   2
 -11   1   4 0.05268 9.57594   2
   1 -11  -4 2.95330 11.6119   4
  -1  11  -4 -19.100 20.1704   1
 -11  -1  -4 6.53974 15.4271   2
 -11   1   4 12.6110 11.6463   3
  -1 -11   4 13.8613 19.5396   3
  -1 -11   4 -22.989 18.5957   2
  11  -3  -4 -7.6893 21.6856   4
  -3 -11  -4 -5.4379 7.82155   4
   3  11  -4 16.3788 22.6858   2
 -11   3  -4 17.5816 16.1592   2
   3  11  -4 10.5517 18.7089   1
   3  11  -4 13.8702 17.9765   5
   3 -11   4 15.9324 15.6380   4
  -3 -11  -4 24.5592 23.5682   2
 -11  -3   4 17.2028 16.2303   3
  11   3   4 34.2050 18.0510   4
   3 -11   4 -12.808 14.5595   3
  -3  11   4 14.9072 15.2832   5
  11   3   4 -10.348 14.6853   2
 -11   3  -4 -0.4634 5.70247   5
  -3 -11  -4 -7.7802 20.3046   3
 -11   3  -4 5.86620 6.06677   3
  -3  11   4 12.1360 14.9126   2
 -11  -3   4 -11.295 13.0086   2
   3 -11   4 1.25824 17.7113   2
  -3  11   4 -19.967 15.6146   1
 -11  -3  -4 -24.694 14.5530   2
  -3 -11   4 3.73307 21.1777   3
 -11   3   4 16.1901 10.2684   3
  11  -3   4 0.19952 20.9372   4
  -3  11  -4 14.6442 16.2482   5
   3 -11  -4 7.72308 16.4852   2
 -11  -3  -4 -10.335 14.8121   3
  -3  11  -4 33.5081 16.9362   2
  -3  11  -4 -7.2654 17.8853   1
 -11   3   4 5.43482 6.18042   2
  -3 -11   4 -25.583 16.5255   2
   3  11   4 5.57519 18.2984   2
   3 -11  -4 10.8665 13.8906   4
   3  11   4 1.50561 17.9406   5
 -11   3   4 -3.6733 8.86150   2
   5  11  -4 25.6899 17.7963   5
 -11   5  -4 50.1463 14.2308   2
   5 -11   4 32.4497 16.4919   2
 -11  -5   4 24.7194 17.7783   2
 -11   5  -4 25.5569 6.73291   5
 -11  -5   4 8.94377 18.0263   3
 -11   5  -4 -0.0116 18.8102   1
  -5  11   4 -0.3992 12.8860   5
  -5  11   4 -16.706 18.7416   1
   5 -11   4 29.4531 18.9385   4
  -5  11   4 0.18241 16.1889   2
   5  11  -4 7.24642 19.1501   2
  -5 -11  -4 -2.8091 17.6843   3
  11   5   4 16.8220 17.7012   2
  -5 -11  -4 -35.779 21.4714   2
  11  -5  -4 23.4693 19.7726   4
   5  11   4 25.1724 19.0904   5
  -5 -11   4 35.1123 23.9666   3
 -11  -5  -4 20.4024 19.1243   2
  11   5  -4 10.9431 14.4761   2
  11  -5   4 12.4709 22.2780   4
   5  11   4 24.9238 23.9303   2
 -11   5   4 18.8970 17.1774   1
 -11   5   4 20.6466 6.12081   2
   5 -11  -4 5.87556 16.0938   4
 -11   5   4 24.2217 11.3184   3
  -5  11  -4 30.9526 16.3849   5
  -5  11  -4 -1.7499 18.1173   2
 -11  -5  -4 27.2206 17.2052   3
  -5 -11   4 7.82056 19.3410   2
  -5  11  -4 41.4727 27.8737   1
  -7  11   4 80.2485 18.2170   2
 -11  -7   4 51.0540 22.6472   2
  11  -7  -4 17.3890 19.9692   4
 -11  -7   4 56.3660 22.9651   3
   7 -11   4 106.662 25.8720   4
 -11   7  -4 49.4731 10.5939   5
  -7  11   4 53.1809 15.4267   5
  11   7   4 79.8104 19.9344   2
  -7 -11  -4 56.6335 23.1925   2
 -11   7  -4 22.0403 25.8616   1
 -11   7  -4 71.1601 15.8556   2
  -7  11   4 63.8287 25.8589   1
  -7 -11  -4 31.6444 20.9918   3
   7  11  -4 64.2942 26.1590   2
   7  11  -4 65.2611 19.7354   5
  -7 -11   4 72.8660 22.8008   3
  11  -7   4 42.9842 21.8093   4
  11   7  -4 50.8015 20.3789   2
  -7  11  -4 67.6358 16.8701   5
 -11   7   4 35.8038 20.8745   1
  -7 -11   4 65.2866 26.6831   2
 -11   7   4 54.1330 9.66500   2
   7  11   4 27.7305 16.2600   5
 -11  -7  -4 44.4368 19.8741   2
   7 -11  -4 55.6325 21.6578   4
  -7  11  -4 83.7566 31.3805   1
  -7  11  -4 13.0277 17.5530   2
   7  11   4 70.1246 24.3191   2
 -11  -7  -4 76.1997 23.5708   3
   9  11  -4 28.7545 25.3612   2
 -11   9  -4 12.7566 27.6968   1
  11   9   4 10.0053 17.7264   2
   9 -11   4 45.4654 24.8149   4
  -9 -11  -4 -3.8089 21.6100   2
  -9  11   4 6.23736 11.3357   5
  -9 -11  -4 7.83489 23.0972   3
 -11   9  -4 13.7744 12.2630   5
  11  -9  -4 20.3784 20.6710   4
 -11  -9   4 31.6141 22.5880   3
 -11   9  -4 -3.7541 13.3839   2
 -11  -9   4 -18.758 17.4880   2
  -9  11   4 -8.6868 13.9173   2
  -9  11   4 20.7990 25.2314   1
  -9  11  -4 19.5701 15.4873   2
   9  11   4 0.08282 25.8258   2
 -11   9   4 34.1293 11.5135   2
  -9 -11   4 17.6982 19.9809   3
  -9  11  -4 29.1946 27.1337   1
 -11  -9  -4 3.68872 22.6031   2
 -11   9   4 -18.117 21.9928   1
  11   9  -4 -23.309 18.7949   2
  -9  11  -4 18.7166 14.8586   5
   9 -11  -4 56.5899 24.6759   4
 -11  -9  -4 33.1202 19.4543   3
  -9 -11   4 -33.364 22.0499   2
  11  -9   4 -41.563 22.1060   4
 -11  11   4 1.60829 12.9927   2
  11 -11  -4 27.9987 25.3763   4
 -11 -11  -4 -19.810 22.4986   3
 -11 -11  -4 -7.0468 25.2468   2
  11  11  -4 -20.076 22.4804   2
  11  11   4 40.2937 24.4160   2
 -11  11   4 -8.8928 26.6021   1
 -11  11   4 6.33040 11.1905   5
 -11 -11   4 33.0021 26.1753   2
  11 -11   4 -13.418 24.9486   4
 -11 -11   4 6.14519 19.5061   3
 -11  11  -4 13.2718 31.0942   1
 -11  11  -4 1.74744 13.9922   5
 -11  11  -4 21.6322 16.5131   2
 -12   0  -4 663.243 36.1856   3
 -12   0   4 660.328 39.7408   3
   0 -12   4 734.845 49.4342   3
 -12   0   4 613.428 34.0385   5
   0  12   4 646.012 46.5968   1
   0 -12   4 646.172 48.1930   2
 -12   0  -4 637.175 40.1629   2
   0  12  -4 684.733 46.8203   5
   0 -12  -4 645.213 47.6098   2
   0  12  -4 574.445 47.6741   2
   0 -12   4 643.604 41.2660   4
  12   0   4 661.273 51.2059   4
 -12   0   4 685.754 37.1951   2
  12   0  -4 597.662 51.3618   4
   0 -12  -4 584.413 45.4949   3
   0 -12  -4 669.592 36.7211   4
   0  12   4 697.590 46.0945   5
   0  12   4 622.578 47.2952   2
   0  12  -4 650.017 49.4256   1
  -2  12   4 471.316 42.0000   2
   2 -12   4 505.592 37.3247   4
 -12  -2   4 420.000 35.4326   3
   2 -12   4 348.387 37.0755   2
  12  -2  -4 513.484 43.4999   4
 -12   2  -4 406.197 24.5666   5
 -12   2  -4 498.179 33.2028   3
   2  12  -4 438.505 37.1104   5
  -2 -12  -4 505.022 47.1111   2
  -2  12   4 461.034 39.0374   1
  -2 -12  -4 399.148 38.8938   3
  -2  12   4 403.983 36.1251   5
  12   2   4 497.941 43.1685   4
   2 -12   4 454.514 38.3734   3
   2  12  -4 416.046 45.4615   1
 -12   2  -4 422.709 34.6434   2
   2  12  -4 514.111 47.6900   2
 -12  -2   4 419.660 33.9200   2
  -2 -12  -4 461.961 27.5530   4
   2 -12  -4 454.119 40.7989   2
  -2  12  -4 450.129 35.6187   5
 -12  -2  -4 490.044 36.9272   2
   2  12   4 401.248 36.1691   5
 -12   2   4 437.394 27.0567   2
   2  12   4 422.531 45.8330   2
   2  12   4 395.041 40.6601   1
  12  -2   4 464.567 45.0575   4
  -2  12  -4 454.663 42.7604   2
 -12  -2  -4 392.739 31.4998   3
  -2  12  -4 435.219 45.8022   1
 -12   2   4 445.056 29.6296   3
  -2 -12   4 497.977 47.1715   2
   2 -12  -4 453.406 33.0439   4
  -2 -12   4 439.743 43.6272   3
 -12   4  -4 339.913 19.1443   5
  12  -4  -4 321.434 38.0217   4
  -4  12   4 302.308 30.6482   5
   4  12  -4 297.672 41.1491   2
 -12  -4   4 298.523 30.2800   3
   4  12  -4 375.409 45.8435   1
  -4  12   4 328.152 37.0118   1
  -4 -12  -4 321.654 40.8437   3
   4 -12   4 391.921 35.6738   4
 -12   4  -4 359.156 29.3444   2
  12   4   4 335.705 36.2428   4
 -12   4  -4 340.838 41.1956   1
   4  12  -4 291.227 35.1039   5
 -12  -4   4 330.536 33.1472   2
   4 -12   4 411.464 37.0082   2
  -4 -12  -4 347.890 40.4802   2
  -4  12   4 280.565 34.7423   2
  -4 -12   4 307.060 38.8962   2
 -12  -4  -4 305.707 31.2732   3
 -12   4   4 372.474 25.3936   3
   4 -12  -4 308.246 31.4393   4
  -4  12  -4 294.373 39.3670   1
   4  12   4 328.595 43.7811   2
 -12   4   4 325.846 18.1054   2
   4  12   4 287.444 32.2154   5
  -4  12  -4 400.288 34.8260   5
  -4  12  -4 316.510 38.0859   2
  12  -4   4 362.029 42.8487   4
  -4 -12   4 339.790 41.6685   3
 -12  -4  -4 393.336 36.5083   2
   6 -12   4 421.253 40.9234   4
 -12   6  -4 429.911 23.6158   5
 -12  -6   4 444.678 40.2325   3
 -12   6  -4 537.625 48.5660   1
 -12   6  -4 421.393 29.6140   2
  12  -6  -4 417.625 46.3233   4
  -6  12   4 379.012 32.4732   5
  -6 -12  -4 363.538 40.0715   3
   6  12  -4 428.415 47.8920   2
   6  12  -4 498.486 39.9830   5
  -6  12   4 372.162 42.3404   1
  -6 -12  -4 432.599 43.9916   2
  -6  12   4 452.990 39.8839   2
 -12  -6   4 485.562 41.6425   2
   6 -12  -4 362.901 37.9989   4
  -6  12  -4 471.465 40.5886   2
 -12   6   4 436.958 42.3130   1
  -6  12  -4 515.455 36.4916   5
 -12   6   4 435.646 20.9904   2
  12  -6   4 425.823 42.5547   4
 -12  -6  -4 415.493 39.5338   2
   6  12   4 392.240 43.1915   2
  -6 -12   4 475.474 47.4270   3
  -6 -12   4 435.137 44.2089   2
  -6  12  -4 508.016 53.9708   1
   6  12   4 424.559 39.3528   5
 -12  -6  -4 460.174 39.3896   3
  -8  12   4 376.778 45.0007   1
  -8  12   4 334.554 29.4287   5
   8 -12   4 364.030 41.7774   4
  -8  12   4 314.633 32.7246   2
  -8 -12  -4 341.314 42.3546   3
   8  12  -4 374.719 33.9051   5
  -8 -12  -4 366.264 42.9163   2
  12  -8  -4 328.126 39.7578   4
 -12  -8   4 277.758 35.3763   3
 -12   8  -4 346.088 28.2146   2
 -12  -8   4 272.671 37.0484   2
 -12   8  -4 351.247 24.0155   5
 -12   8  -4 395.545 52.1520   1
   8  12  -4 322.252 41.2980   2
   8  12   4 361.206 35.8608   5
   8 -12  -4 294.206 38.4186   4
  12  -8   4 333.944 40.7011   4
   8  12   4 342.941 45.5302   2
  -8 -12   4 376.506 42.2920   2
  -8 -12   4 283.383 40.5706   3
 -12  -8  -4 361.544 42.9267   2
  -8  12  -4 327.974 34.3567   2
 -12  -8  -4 284.772 36.4682   3
  -8  12  -4 300.412 30.2444   5
 -12   8   4 358.008 20.9869   2
 -12   8   4 292.997 39.0294   1
  -8  12  -4 305.163 44.6377   1
  10  12  -4 354.090 45.0778   2
  10 -12   4 334.745 42.8176   4
 -12 -10   4 286.421 39.6129   2
 -12 -10   4 333.728 41.7153   3
 -10  12   4 254.132 25.7891   5
  12 -10  -4 307.845 41.1186   4
 -10 -12  -4 357.891 40.0943   3
 -10 -12  -4 235.544 37.8471   2
 -10  12   4 283.711 29.2663   2
 -12  10  -4 292.974 46.1838   1
 -10  12   4 226.934 40.4168   1
 -12  10  -4 289.569 26.5759   5
 -12  10  -4 302.650 28.2084   2
 -10 -12   4 263.238 37.1615   3
 -12  10   4 307.613 41.9939   1
 -10  12  -4 315.379 45.0585   1
 -12 -10  -4 382.165 37.8523   3
  10 -12  -4 271.292 38.0221   4
 -12  10   4 275.796 23.3506   2
 -12  10   4 294.933 21.5908   5
 -12 -10  -4 301.948 37.8250   2
  10  12   4 245.248 39.4988   2
 -10  12  -4 322.681 34.7247   2
 -10  12  -4 293.002 30.2106   5
  12 -10   4 319.091 42.5076   4
 -10 -12   4 256.012 37.3144   2
  12 -12   4 249.440 36.4879   4
 -12  12   4 151.810 37.6243   1
 -12 -12   4 245.404 39.1200   3
 -12  12  -4 153.341 24.0252   2
 -12  12   4 236.350 23.9486   5
 -12 -12  -4 203.104 33.6767   3
 -12  12  -4 221.537 25.3715   5
 -12 -12   4 245.091 40.2526   2
 -12  12   4 241.939 24.5507   2
 -12  12  -4 214.112 42.3389   1
 -12 -12  -4 205.111 38.1991   2
  12 -12  -4 247.943 38.3649   4
   1 -13   4 -22.683 20.9330   2
   1  13  -4 5.82104 19.7580   2
  13  -1  -4 -17.078 22.3676   4
   1  13  -4 -17.056 17.6355   1
  -1  13   4 -9.1327 18.5929   1
   1 -13   4 -1.3503 13.5065   4
 -13  -1   4 -9.3562 12.4897   2
  -1 -13  -4 53.3798 23.7653   3
  -1  13   4 -4.2763 17.4459   5
 -13   1  -4 -21.490 13.9360   2
  13   1   4 -26.744 15.5205   4
   1  13  -4 -6.3172 19.8352   5
 -13  -1   4 5.86705 12.6311   3
  -1 -13  -4 1.02024 17.6562   2
  -1  13   4 16.7162 21.3614   2
 -13   1  -4 15.4219 14.7301   5
   1 -13   4 22.4184 19.4742   3
  -1 -13   4 5.38901 16.8374   3
   1  13   4 23.5633 24.3035   2
   1 -13  -4 17.4044 13.0466   4
 -13  -1  -4 -14.462 14.9474   2
 -13   1   4 -0.6464 11.4360   3
 -13   1   4 -3.8366 6.80248   5
  -1  13  -4 51.7191 24.3450   2
  -1 -13   4 0.01572 23.5708   2
 -13   1   4 14.1268 10.6597   2
  13   1  -4 6.22595 22.2667   4
  -1  13  -4 3.07534 18.8679   5
 -13  -1  -4 -1.0241 12.8534   3
   1 -13  -4 -24.427 19.9552   3
   1  13   4 7.08471 18.9222   1
   1  13   4 24.6578 17.0039   5
   1 -13  -4 14.2483 17.1482   2
  -1  13  -4 -15.480 22.1914   1
  -1 -13   4 18.2608 13.8502   4
  13  -1   4 2.67324 18.6097   4
  13  -3  -4 10.0582 23.8674   4
   3  13  -4 -28.084 23.1021   1
   3 -13   4 49.8316 21.1434   2
 -13   3  -4 8.63723 19.5503   2
   3 -13   4 17.8053 16.8686   4
   3  13  -4 20.6886 22.8851   2
 -13   3  -4 12.5513 9.20123   5
  -3 -13  -4 13.2555 21.1114   2
 -13   3  -4 33.9003 23.7034   1
  13   3   4 -4.2056 19.9507   4
  -3 -13  -4 40.1523 24.1099   3
  -3  13   4 35.6637 21.9576   2
   3 -13   4 19.0505 18.7196   3
 -13  -3   4 21.4456 16.4321   3
  -3  13   4 51.8579 19.0642   5
   3  13  -4 30.4072 21.8910   5
 -13  -3   4 22.7505 15.6998   2
  -3  13   4 26.0457 21.9979   1
 -13   3   4 30.7296 10.8078   2
 -13  -3  -4 12.7478 15.0667   3
  -3 -13   4 42.0064 20.7328   3
   3  13   4 34.3518 22.1749   2
 -13  -3  -4 23.4127 16.9549   2
  -3  13  -4 12.5034 22.1462   2
  -3 -13   4 35.6256 25.8179   2
   3 -13  -4 17.8797 16.7762   4
  13  -3   4 31.4302 20.9975   4
  -3  13  -4 40.4508 25.1630   1
  -3  13  -4 41.8263 17.2406   5
   3  13   4 25.1179 18.3268   5
  13  -5  -4 49.1036 26.5961   4
   5  13  -4 8.67714 21.8747   2
 -13   5  -4 17.1685 8.11915   5
 -13  -5   4 -0.0671 17.7413   2
   5  13  -4 12.6252 20.5653   5
  -5  13   4 -17.020 19.0044   1
 -13   5  -4 -14.364 20.8365   1
   5 -13   4 -11.075 18.3604   4
  -5  13   4 38.3794 19.9017   2
 -13   5  -4 10.4181 12.0706   2
  -5 -13  -4 45.3560 27.6005   2
 -13  -5   4 39.2490 18.8580   3
  -5 -13  -4 3.97855 24.6494   3
  -5  13   4 -3.3097 15.5328   5
 -13  -5  -4 39.3479 18.1475   3
  -5  13  -4 -24.833 19.3668   2
 -13   5   4 8.02745 17.7574   1
   5  13   4 -8.3138 20.4551   2
  -5  13  -4 -3.3353 16.9003   5
  13  -5   4 -9.3103 23.4656   4
  -5 -13   4 10.9300 25.3767   2
 -13  -5  -4 -11.997 17.5694   2
   5  13   4 -1.8428 16.6613   5
  -5 -13   4 18.2509 24.4165   3
   5 -13  -4 11.4398 17.3857   4
  -5  13  -4 -13.021 25.1100   1
  -7  13   4 51.3260 19.3483   2
   7  13  -4 -9.6917 18.4968   5
  -7  13   4 -2.5541 21.2857   1
 -13  -7   4 11.1262 21.7507   2
   7  13  -4 64.7021 30.4127   2
 -13   7  -4 36.8372 13.4021   2
  13  -7  -4 31.5397 26.8533   4
  -7 -13  -4 34.2525 26.9363   3
 -13   7  -4 17.9682 30.1341   1
  -7 -13  -4 25.3180 22.8419   2
 -13   7  -4 34.1034 10.3389   5
 -13  -7   4 12.2486 20.7037   3
  -7  13   4 28.2845 15.4991   5
   7 -13   4 68.8609 23.7124   4
  -7  13  -4 7.79341 17.4303   5
  -7 -13   4 -2.7568 20.1108   3
 -13  -7  -4 27.4466 22.7003   2
  -7  13  -4 23.9107 24.2129   1
  -7  13  -4 -22.001 17.8003   2
   7  13   4 30.1578 22.4882   2
   7 -13  -4 19.2543 20.0250   4
  -7 -13   4 7.94792 26.0315   2
  13  -7   4 14.1203 21.1323   4
 -13  -7  -4 8.53223 20.4602   3
 -13   7   4 81.6577 26.7276   1
   7  13   4 33.3583 18.2503   5
  -9  13   4 53.9910 17.7870   5
 -13   9  -4 3.80751 12.7117   2
 -13   9  -4 12.4631 25.9776   1
 -13  -9   4 21.7467 23.4291   2
 -13   9  -4 -4.6630 10.8420   5
  -9 -13  -4 -11.754 25.8515   2
  13  -9  -4 -5.7698 25.7157   4
   9  13  -4 1.44639 22.1551   2
  -9  13   4 -16.486 22.3886   1
   9 -13   4 1.80032 19.6640   4
 -13  -9   4 -5.6989 17.7428   3
  -9 -13  -4 11.3657 26.0236   3
  -9  13   4 22.4439 15.1384   2
 -13   9   4 27.5242 25.7349   1
   9  13   4 -20.320 18.2879   2
 -13  -9  -4 29.5886 23.8545   2
 -13  -9  -4 29.0512 22.6291   3
  13  -9   4 -31.673 19.3649   4
  -9  13  -4 -9.7666 16.6919   2
  -9  13  -4 -15.081 14.3248   5
  -9  13  -4 34.9129 32.6780   1
  -9 -13   4 30.7553 24.6350   2
  -9 -13   4 40.2100 28.4259   3
   9 -13  -4 6.43612 21.2909   4
  11 -13   4 5.62635 25.3003   4
 -13 -11   4 2.05215 26.1111   2
 -11 -13  -4 12.6302 26.1386   3
 -11 -13  -4 46.9716 23.4228   2
 -11  13   4 -4.3976 13.4649   5
  13 -11  -4 -7.8582 25.0971   4
 -11  13   4 -7.9272 13.5092   2
 -13  11  -4 31.9196 15.9531   2
 -13  11  -4 -31.405 11.7790   5
 -13  11  -4 -20.156 33.2430   1
 -13 -11   4 32.2718 25.3186   3
  11  13   4 -51.866 24.4031   2
 -13 -11  -4 -17.665 18.1582   3
 -11  13  -4 -10.426 14.2683   5
  13 -11   4 -13.340 20.0676   4
 -13 -11  -4 -18.085 26.2633   2
 -11 -13   4 -6.0551 27.4761   3
  11 -13  -4 45.4959 25.9937   4
 -11 -13   4 34.6533 29.0751   2
 -11  13  -4 -41.019 26.2327   1
 -13  11   4 34.8083 29.9586   1
 -11  13  -4 -8.1652 17.3991   2
   0  14  -4 311.876 33.4249   5
   0  14   4 316.142 37.0915   5
  14   0   4 313.325 39.9350   4
   0 -14   4 335.022 39.5611   3
   0  14   4 363.937 39.4575   1
   0 -14   4 289.054 38.0943   2
  14   0  -4 319.118 39.5072   4
   0  14   4 371.988 39.9585   2
   0 -14   4 302.648 30.7470   4
   0 -14  -4 330.215 40.5948   3
   0 -14  -4 330.519 38.0853   2
 -14   0   4 397.802 28.9593   2
   0  14  -4 331.747 40.3531   1
   0  14  -4 300.623 39.0762   2
 -14   0   4 332.109 27.7611   3
 -14   0  -4 280.326 31.5478   2
  14  -2  -4 297.181 40.6391   4
  -2 -14  -4 320.592 40.8149   2
  14   2   4 337.955 41.6870   4
 -14   2  -4 373.509 27.5264   5
 -14  -2   4 341.986 30.2689   2
   2 -14   4 329.478 32.0653   4
  -2  14   4 285.721 31.6898   5
  -2 -14  -4 285.285 37.1940   3
  -2  14   4 346.826 40.7533   2
   2  14  -4 316.279 34.6660   5
   2  14  -4 291.209 41.2852   2
 -14   2  -4 375.687 36.0241   2
   2 -14   4 322.619 37.2682   3
 -14  -2   4 345.008 31.4217   3
   2  14  -4 326.776 43.7272   1
   2 -14   4 329.426 39.4038   2
  -2  14   4 282.057 37.8113   1
 -14  -2  -4 340.992 33.5687   2
  -2  14  -4 358.407 39.0299   2
  14  -2   4 346.220 39.3765   4
   2  14   4 316.533 40.3918   2
 -14   2   4 339.372 26.1430   2
  -2 -14   4 391.566 38.9289   3
  -2  14  -4 370.718 45.9801   1
  -2  14  -4 324.360 36.8418   5
   2  14   4 250.114 33.0036   5
  -2 -14   4 333.046 39.5814   2
 -14  -2  -4 348.801 31.1663   3
 -14   4  -4 377.154 31.3653   2
   4 -14   4 370.404 36.4606   4
  -4  14   4 293.158 35.6914   2
  -4 -14  -4 476.020 46.9430   3
 -14  -4   4 327.128 35.2452   3
   4  14  -4 400.006 40.7733   5
 -14   4  -4 338.714 45.9063   1
  -4 -14  -4 492.206 50.7327   2
  -4  14   4 448.138 37.7550   5
  14  -4  -4 383.825 47.2938   4
   4  14  -4 362.463 45.4169   2
 -14  -4   4 366.275 37.5477   2
 -14   4  -4 395.215 24.3094   5
  -4  14   4 391.018 40.3136   1
   4  14   4 312.668 40.7673   5
  -4  14  -4 302.545 41.7352   1
   4 -14  -4 366.433 35.5226   4
 -14  -4  -4 394.483 37.2956   3
   4  14   4 396.885 49.7359   2
  -4  14  -4 437.812 43.6488   2
  -4 -14   4 466.245 44.9586   2
  -4 -14   4 406.762 42.5464   3
  14  -4   4 362.130 40.6008   4
  -4  14  -4 370.844 38.1981   5
 -14  -4  -4 407.255 38.2465   2
  -6  14   4 337.277 33.2393   5
 -14  -6   4 338.632 38.1217   2
  14  -6  -4 303.646 39.7689   4
 -14   6  -4 323.012 26.1306   2
  -6  14   4 297.136 36.0199   1
 -14   6  -4 305.112 21.5670   5
  -6  14   4 316.964 39.2139   2
   6  14  -4 462.550 40.5258   5
 -14  -6   4 366.862 38.5100   3
  -6 -14  -4 369.498 48.5663   2
   6 -14   4 276.763 36.8940   4
   6  14  -4 362.802 43.7161   2
 -14   6  -4 356.629 46.2867   1
  -6 -14  -4 319.810 40.1665   3
 -14   6   4 332.664 41.0777   1
  -6  14  -4 292.347 38.5217   2
  -6  14  -4 415.822 50.8759   1
  -6  14  -4 357.168 35.1118   5
  -6 -14   4 357.432 41.5625   3
 -14  -6  -4 299.903 35.8887   3
   6 -14  -4 266.437 34.4700   4
   6  14   4 260.481 35.0004   5
  -6 -14   4 328.660 43.1308   2
 -14  -6  -4 386.447 40.2757   2
   6  14   4 360.321 45.5899   2
  14  -6   4 336.713 41.3701   4
  -8  14   4 199.484 25.4955   5
 -14   8  -4 228.062 22.3134   2
  -8  14   4 268.299 34.0556   2
 -14  -8   4 252.771 32.1097   3
  -8 -14  -4 249.929 35.6729   3
 -14   8  -4 212.204 20.9165   5
  14  -8  -4 204.734 37.1969   4
 -14  -8   4 235.908 34.8423   2
  -8 -14  -4 206.782 35.6118   2
   8 -14   4 298.282 38.9571   4
 -14   8  -4 214.114 38.0168   1
   8  14  -4 241.260 37.7786   2
  -8 -14   4 284.857 41.7929   2
  -8 -14   4 108.104 34.6179   3
  14  -8   4 285.133 39.6219   4
   8 -14  -4 224.382 33.5542   4
  -8  14  -4 247.740 30.3156   5
 -14  -8  -4 246.805 33.6529   2
   8  14   4 164.236 38.6620   2
   8  14   4 254.774 32.8050   5
  -8  14  -4 246.132 33.8243   2
  -8  14  -4 273.447 43.4191   1
 -14   8   4 295.665 40.7403   1
 -14  -8  -4 258.815 33.3474   3
 -10  14   4 221.187 27.0085   2
  10  14  -4 244.066 36.9722   2
  14 -10  -4 181.511 33.4230   4
 -14 -10   4 195.412 30.9142   3
 -10 -14  -4 206.859 34.4035   3
 -10  14   4 182.748 25.0793   5
 -14 -10   4 199.007 34.8948   2
 -14  10  -4 194.506 22.6274   5
 -10 -14  -4 189.538 38.6381   2
  10 -14   4 173.394 33.6436   4
 -14  10  -4 211.537 44.2054   1
  10  14   4 205.845 35.6717   2
 -10  14  -4 144.502 40.9035   1
 -10 -14   4 163.773 36.4299   3
 -14  10   4 145.186 33.0028   1
 -10  14  -4 207.012 30.5494   2
 -14 -10  -4 139.632 32.7708   2
  14 -10   4 144.760 32.3509   4
 -14 -10  -4 169.439 29.0756   3
  10 -14  -4 178.693 32.8386   4
 -10  14  -4 145.544 26.9411   5
 -10 -14   4 199.377 39.0267   2
   1 -15   4 -19.663 19.8868   2
   1  15  -4 29.6238 26.5322   2
  -1 -15  -4 -7.1810 22.4046   3
 -15   1  -4 -29.246 15.3248   2
  -1 -15  -4 39.0591 23.9588   2
  -1  15   4 -10.574 20.4047   5
   1  15  -4 2.03129 17.6979   5
  -1  15   4 -5.8779 22.4705   2
  15  -1  -4 7.74847 20.4657   4
 -15  -1   4 -0.0472 13.9328   2
  -1  15   4 17.9611 20.3025   1
  15   1   4 13.3249 24.0384   4
   1 -15   4 -25.098 15.9389   3
   1  15  -4 -22.276 23.1802   1
   1  15   4 37.4298 21.7513   1
   1  15   4 13.1246 26.8167   2
  -1  15  -4 -10.413 25.4815   2
  -1 -15   4 7.53047 17.7924   3
  -1 -15   4 14.6837 23.9537   2
   1  15   4 45.8771 23.2797   5
  -1  15  -4 25.4457 22.2455   5
  -1  15  -4 -14.351 19.9915   1
  15  -1   4 15.6142 21.5226   4
 -15   1   4 -25.700 11.8366   2
 -15  -1  -4 -13.395 13.2720   2
   3  15  -4 21.6833 23.0899   2
 -15   3  -4 32.3731 25.6420   1
   3 -15   4 29.4577 19.7964   3
   3  15  -4 20.4623 25.8754   1
   3 -15   4 3.04628 19.0823   4
  -3 -15  -4 7.62311 19.5118   2
  15  -3  -4 39.6572 26.8602   4
 -15  -3   4 -3.7002 14.6818   3
 -15   3  -4 18.4069 13.3943   5
  -3  15   4 -18.829 20.9348   2
  15   3   4 21.6533 23.0447   4
  -3  15   4 11.2823 19.8023   5
  -3 -15  -4 -20.280 23.9457   3
 -15  -3   4 -13.350 16.4948   2
  -3  15   4 -13.362 19.3096   1
 -15   3  -4 -8.1375 16.2428   2
   3  15  -4 36.7855 20.1409   5
   3  15   4 11.0304 27.4935   2
  15  -3   4 10.2047 25.9450   4
 -15  -3  -4 11.9022 17.1948   2
   3  15   4 22.1856 20.4583   5
  -3  15  -4 -19.643 16.7293   2
  -3  15  -4 16.2131 25.1291   1
  -3 -15   4 -35.323 23.9382   2
  -3  15  -4 22.7389 21.7776   5
  -3 -15   4 24.1435 25.0691   3
   5  15  -4 -12.243 16.9016   5
 -15   5  -4 80.7070 31.7791   1
 -15   5  -4 -11.086 11.2395   2
 -15   5  -4 15.1929 10.8870   5
   5 -15   4 -5.6966 20.4944   4
  -5  15   4 8.08187 19.9123   2
 -15  -5   4 6.97821 20.7021   2
  15  -5  -4 -20.049 20.7523   4
 -15  -5   4 -36.798 15.9410   3
   5  15  -4 -11.729 22.7887   2
  -5 -15  -4 46.0725 28.7816   2
  -5  15   4 0.43148 18.6252   5
  -5 -15  -4 -12.680 20.1658   3
 -15  -5  -4 -2.4006 17.2973   3
  15  -5   4 -13.689 20.2113   4
  -5  15  -4 -8.1670 21.7021   2
  -5 -15   4 -0.2774 26.6519   2
   5  15   4 99.9303 26.2870   5
  -5  15  -4 9.46277 15.8714   5
 -15  -5  -4 10.6029 18.8371   2
   5  15   4 16.2784 24.2896   2
  -5  15  -4 -16.581 24.0018   1
 -15   5   4 22.8349 22.6841   1
  -5 -15   4 33.3978 22.6091   3
  -7  15   4 54.6305 19.8501   5
   7  15  -4 26.1098 21.1860   5
   7 -15   4 22.2823 21.5140   4
  15  -7  -4 -20.293 20.0602   4
  -7  15   4 17.8383 22.6618   2
   7  15  -4 -8.5006 23.2080   2
  -7 -15  -4 17.2134 22.0020   3
 -15  -7   4 0.40118 20.3903   2
  -7 -15  -4 70.3101 29.9151   2
 -15   7  -4 0.02482 25.2903   1
 -15  -7   4 10.6392 21.4008   3
 -15  -7  -4 30.7256 22.0086   2
  -7  15  -4 20.2564 20.2203   2
  15  -7   4 5.58611 25.9195   4
 -15  -7  -4 -12.128 17.4175   3
  -7  15  -4 -23.751 17.8003   5
   7  15   4 26.6841 21.8678   5
  -7 -15   4 21.3180 27.4892   3
  -7 -15   4 -20.013 21.2294   2
   7 -15  -4 2.73109 23.5701   4
   7  15   4 4.67796 23.6249   2
  -7  15  -4 14.5708 29.1226   1
 -15   7   4 10.2534 26.7094   1
   9  15  -4 -0.9317 23.0370   2
  -9  15   4 11.3440 18.7390   2
 -15  -9   4 9.39432 22.8296   2
 -15  -9   4 -9.4782 21.1174   3
  -9 -15  -4 4.02331 23.0879   2
  -9 -15  -4 33.4067 24.0959   3
  -9  15   4 18.8695 17.1469   5
 -15   9  -4 41.2176 31.8379   1
   9 -15   4 28.9782 24.9488   4
  15  -9  -4 9.83227 23.8410   4
  15  -9   4 -12.915 26.2033   4
 -15   9   4 -17.581 21.9969   1
 -15  -9  -4 4.54270 20.9391   3
  -9  15  -4 42.0271 23.9942   2
   9  15   4 25.7994 25.1805   2
  -9 -15   4 -12.687 25.5797   3
  -9  15  -4 58.4944 27.9323   1
 -15  -9  -4 -14.472 23.4121   2
   9 -15  -4 15.0317 23.2912   4
  -9 -15   4 -3.9150 22.7768   2
  -9  15  -4 -9.7938 20.9995   5
   0  16  -4 282.737 39.2807   2
   0  16   4 293.474 37.4701   5
   0  16   4 283.727 40.8707   2
   0  16  -4 274.669 34.7406   5
 -16   0   4 346.240 27.7191   2
  16   0   4 263.297 37.1079   4
   0 -16   4 293.736 37.6849   2
   0  16   4 280.499 37.8504   1
   0  16  -4 215.351 36.7812   1
 -16   0  -4 259.055 32.0249   2
   0 -16   4 317.142 38.1501   3
 -16  -2   4 316.497 30.3216   2
   2 -16   4 356.241 40.7627   3
  -2 -16  -4 356.141 42.5194   2
  16   2   4 286.033 37.4059   4
   2  16  -4 334.115 39.9835   5
 -16   2  -4 395.522 35.8557   5
  -2  16   4 372.147 44.5302   2
   2  16  -4 358.927 47.4246   1
  -2 -16  -4 313.267 40.6982   3
  -2  16   4 362.188 40.5136   5
   2  16  -4 366.237 43.7229   2
 -16   2  -4 352.832 35.0808   2
  16  -2  -4 387.202 46.7371   4
   2  16   4 377.337 38.5358   5
  -2 -16   4 363.207 46.0005   2
  -2 -16   4 343.490 43.7679   3
 -16  -2  -4 293.879 35.8417   2
   2  16   4 347.574 43.1900   2
  -2  16  -4 450.022 47.9714   1
  16  -2   4 353.685 41.9636   4
  -2  16  -4 346.975 40.3484   5
  -2  16  -4 307.153 42.0106   2
  -4  16   4 272.072 33.1256   5
 -16  -4   4 314.684 34.0196   2
 -16   4  -4 330.882 29.3606   2
 -16   4  -4 321.367 43.5470   1
 -16   4  -4 338.287 27.3431   5
   4  16  -4 343.875 37.1152   5
  -4 -16  -4 344.417 43.6264   2
  -4  16   4 419.860 43.3801   2
  16  -4  -4 301.900 44.1069   4
  -4 -16  -4 347.202 42.0896   3
   4  16  -4 279.480 43.9047   2
 -16  -4   4 276.894 33.9669   3
  -4 -16   4 303.821 40.8982   2
  -4  16  -4 401.962 44.8081   2
  -4  16  -4 288.699 41.0918   1
  -4 -16   4 375.731 45.6098   3
   4  16   4 352.455 44.0850   2
   4  16   4 338.312 41.1890   5
  16  -4   4 319.745 42.0507   4
 -16   4   4 324.653 41.8859   1
 -16  -4  -4 360.320 39.8380   2
  -4  16  -4 356.069 39.7344   5
 -16  -6   4 127.022 26.0573   2
   6  16  -4 156.575 34.2928   2
  -6 -16  -4 116.265 33.2870   3
  -6  16   4 160.813 29.5961   2
 -16   6  -4 149.272 33.8435   1
  16  -6  -4 158.702 35.7148   4
  -6 -16  -4 85.5906 34.3222   2
   6  16  -4 137.767 28.4868   5
  -6  16   4 161.028 27.6927   5
 -16  -6   4 163.633 28.5365   3
 -16  -6  -4 128.995 27.4178   2
  16  -6   4 120.658 30.4569   4
  -6  16  -4 159.683 31.1834   2
  -6  16  -4 165.705 29.1737   5
  -6 -16   4 149.307 34.9454   3
  -6 -16   4 163.262 34.0920   2
 -16   6   4 148.378 35.4294   1
   6  16   4 136.853 27.4920   5
  -6  16  -4 144.530 35.4648   1
   6  16   4 88.0137 34.9622   2
  -1 -17  -4 11.9099 25.5449   3
  17  -1  -4 -22.586 19.6119   4
   1  17  -4 12.1546 21.9715   2
 -17   1  -4 -15.598 17.4091   2
 -17  -1   4 6.16646 15.5811   2
   1 -17   4 31.5311 23.7414   3
   1  17  -4 23.8263 25.0377   5
   1  17  -4 52.2096 27.8759   1
  17   1   4 23.3552 22.8378   4
  -1  17   4 58.7227 26.8033   5
  -1  17   4 -21.937 18.7392   2
   1  17   4 20.2662 24.5724   5
   1  17   4 15.8371 22.3997   2
  -1  17  -4 -50.573 23.5526   1
  -1  17  -4 8.83020 19.4722   5
  17  -1   4 -3.5855 21.1131   4
  -1 -17   4 22.8144 21.6323   2
  -1  17  -4 41.6048 28.4083   2
 -17  -1  -4 11.3558 14.9821   2
  -1 -17   4 2.52820 21.8878   3
  -3 -17  -4 40.1187 28.4647   2
  -3  17   4 -0.3232 23.5210   2
  -3 -17  -4 30.7082 23.7808   3
   3  17  -4 34.0750 25.4727   5
  -3  17   4 19.3253 19.9914   5
   3  17  -4 -6.8856 24.4660   2
 -17   3  -4 14.9245 24.8995   1
  17  -3  -4 -10.713 26.6573   4
 -17  -3   4 23.9415 18.0036   2
 -17   3  -4 24.2418 17.4544   5
 -17  -3  -4 7.57223 16.7703   2
  -3  17  -4 4.39944 24.7624   2
   3  17   4 24.8532 25.2603   5
  -3 -17   4 -13.137 24.9842   3
  -3  17  -4 14.5446 22.6884   5
  -3  17  -4 34.4679 26.0937   1
  17  -3   4 -26.127 25.4756   4
   3  17   4 59.9471 31.5972   2
  -3 -17   4 -9.3993 23.0905   2
   5  17  -4 8.67925 19.0984   5
  17  -5  -4 9.29636 23.5317   4
  -5 -17  -4 37.9470 30.8440   3
 -17   5  -4 -17.114 24.2446   1
  -5  17   4 61.4463 26.2043   2
 -17  -5   4 -3.9937 19.8013   2
   5  17  -4 14.7924 31.4509   2
  -5  17   4 58.6293 23.9180   5
  -5 -17  -4 20.7932 22.8973   2
 -17   5   4 6.58249 28.9577   1
   5  17   4 43.7133 26.8308   5
  -5 -17   4 22.7323 28.8559   3
  -5  17  -4 0.58206 22.0833   5
  -5  17  -4 9.62602 23.6253   2
  -5 -17   4 27.8224 31.1560   2
  17  -5   4 54.8258 26.3576   4
  -5  17  -4 5.15942 27.6932   1
 -17  -5  -4 22.2404 20.0332   2
   5  17   4 103.612 34.1915   2
   0  -1  -5 1.82542 2.39480   1
   1   0   5 -0.8446 6.25217   2
  -1   0   5 -0.0542 3.75618   2
  -1   0  -5 -8.6506 3.83327   5
   0  -1   5 -2.7043 5.48075   2
   1   0  -5 -0.0468 5.44770   2
  -1   0  -5 -13.212 7.77900   2
   0  -1   5 2.08247 6.00391   2
   0   1  -5 2.57865 5.55046   2
   0  -1  -5 -8.9324 6.33105   2
   0   1   5 2.55529 5.05212   2
   1   0   5 -2.2544 8.34812   2
   0   1  -5 3.79055 9.00022   1
  -1   0   5 8.90488 5.82800   2
   0   1  -5 0.61598 4.07575   3
  -1   0  -5 0.59375 6.28328   2
   1   0  -5 -2.0219 5.63325   1
   0  -1   5 2.74692 5.88599   3
   0   1  -5 0.56693 3.68626   5
   0   1  -5 8.46010 6.29466   2
  -1   0   5 -1.6011 3.38349   1
   1   0  -5 4.19645 4.87137   2
   1   0   5 2.98407 5.97084   5
  -1   0  -5 -6.0606 6.67382   1
   0  -1  -5 -7.4317 4.96336   2
   0  -1   5 1.03777 3.78663   5
   0   1   5 4.04719 4.94313   2
   2  -1  -5 324.260 21.4764   4
   1  -2   5 388.633 19.7382   5
   2  -1  -5 339.179 15.4150   2
  -2  -1   5 342.807 17.0918   5
  -2   1  -5 359.036 24.4035   1
   1  -2   5 384.366 24.2979   2
   2   1   5 376.903 19.5815   3
   1  -2   5 404.461 19.5181   3
  -2  -1   5 365.108 21.1239   2
   1   2  -5 364.871 27.0029   1
  -1  -2  -5 350.823 23.1223   2
  -2  -1   5 347.489 19.3209   2
   2   1   5 327.833 18.9191   4
   1   2  -5 325.977 22.6124   2
  -1   2   5 343.335 19.6419   2
   1   2  -5 334.203 20.4929   5
  -1  -2  -5 332.429 21.5632   3
   2   1   5 345.635 24.1669   2
  -1   2   5 380.214 16.9495   1
  -2   1  -5 355.328 25.2533   2
  -1   2   5 350.151 19.3767   2
  -1   2   5 383.784 20.1344   4
  -2  -1   5 325.790 23.0179   3
  -2   1  -5 340.461 25.2854   2
   1  -2  -5 357.083 19.8851   2
   2  -1   5 351.409 22.2474   4
   1   2   5 314.046 22.6482   3
   2  -1   5 384.274 17.3679   5
  -2   1   5 331.516 17.4980   2
  -1   2  -5 362.375 28.3274   1
  -2   1   5 287.795 20.4517   4
   2   1  -5 340.613 20.8576   2
   2  -1   5 389.045 23.3180   2
  -2  -1  -5 372.293 22.8529   2
  -1  -2   5 357.090 23.1357   2
  -1  -2   5 368.742 22.3107   3
  -1  -2   5 394.606 21.1049   5
   2   1  -5 320.745 21.5535   3
  -2  -1  -5 386.446 20.2150   3
  -2   1   5 384.323 16.2986   2
   1   2   5 332.226 22.9995   2
   1  -2  -5 343.884 19.5102   4
  -1   2  -5 333.367 21.9665   2
  -3   0   5 -15.412 8.49108   3
   3   0   5 0.82496 6.58147   3
   0   3   5 -10.706 11.9322   2
  -3   0  -5 -1.2682 10.8582   2
   0   3  -5 -6.5339 13.9471   1
   3   0   5 -2.4035 5.68345   5
   3   0  -5 -2.7792 7.17811   2
   0   3  -5 -7.3593 10.5821   3
   3   0  -5 3.05436 4.19520   2
   3   0   5 0.65744 13.5700   2
  -3   0   5 -0.0493 6.79784   2
  -3   0  -5 7.48517 6.54974   3
   0   3   5 -13.105 5.19493   4
  -3   0   5 -6.7260 8.76788   4
   0  -3  -5 -3.1187 9.66758   1
  -3   0   5 -7.4296 5.68303   2
  -3   0  -5 -1.3466 11.0169   4
   0  -3   5 2.67288 9.07454   3
   0  -3  -5 0.30748 9.98989   2
   3   0   5 -5.2380 9.84937   4
   0   3  -5 -10.248 10.1761   5
  -3   0  -5 -6.7178 7.68233   5
   0   3  -5 -4.1620 13.9643   2
  -3   0  -5 3.26003 9.95624   2
   0   3   5 -0.4500 10.1924   2
   0  -3  -5 0.03777 5.70072   4
   0   3   5 7.54918 6.29105   1
   2  -3   5 71.4053 12.9611   2
   2   3  -5 76.7657 17.1208   1
   3  -2  -5 86.5865 16.0097   4
  -2  -3  -5 75.5280 7.67690   4
   2   3  -5 86.5315 12.0718   5
  -2  -3  -5 81.6179 16.3262   3
  -2   3   5 84.6112 10.9682   2
   2  -3   5 75.8652 9.91155   3
  -3   2  -5 63.0952 8.55948   5
   3   2   5 98.8815 15.3998   2
   2  -3   5 67.9185 14.2716   4
  -2   3   5 93.6764 14.1653   4
  -3  -2   5 95.1650 13.8152   2
   3   2   5 60.2647 14.3129   3
  -2  -3  -5 78.3947 18.1470   2
  -2   3   5 75.0373 11.3801   1
  -3   2  -5 67.8082 13.9051   2
  -3  -2   5 74.8721 14.4997   2
   3   2   5 78.1853 11.3118   4
   2   3  -5 71.9269 15.6288   2
  -2   3   5 72.1334 11.2839   2
  -3  -2   5 91.9197 11.2213   5
  -3   2  -5 78.5924 14.5193   2
   3   2   5 79.7175 12.5372   5
  -3   2  -5 100.023 14.2218   4
  -3   2  -5 69.9722 16.5396   1
  -3  -2   5 62.6081 16.2965   3
  -3  -2  -5 76.5917 16.5566   2
  -2  -3   5 88.3863 15.4309   3
   2  -3  -5 73.0429 9.51597   2
  -3  -2  -5 77.5008 11.2131   4
  -2   3  -5 71.5539 9.64196   3
   3  -2   5 79.7639 15.4119   4
   3  -2   5 73.4567 12.9767   2
   2  -3  -5 61.7267 13.4204   4
  -2   3  -5 85.7307 15.1558   2
  -2   3  -5 68.8178 22.2898   1
   2   3   5 91.6250 16.2041   2
  -3   2   5 101.376 14.8793   4
  -3   2   5 65.0431 7.54810   2
  -3   2   5 74.1070 7.30213   2
  -2  -3   5 91.2290 13.7963   5
   3   2  -5 52.9626 14.4178   2
   3   2  -5 91.2863 11.0184   5
  -3  -2  -5 83.9775 14.3075   3
  -2  -3   5 57.8925 13.8268   2
  -2   3  -5 97.3358 13.6176   2
  -2   3  -5 64.7436 10.4636   5
  -4   1  -5 -0.6964 6.02214   5
   4  -1  -5 1.79214 15.7185   4
  -1   4   5 -5.8809 8.13865   4
  -4  -1   5 -0.3214 12.9149   3
  -4   1  -5 -5.9807 4.10991   3
  -4  -1   5 -2.0650 4.12115   5
  -4  -1   5 -5.4204 10.2733   2
  -1  -4  -5 13.1599 13.1427   3
   4   1   5 -9.9937 12.7005   2
   1   4  -5 -8.7499 14.8590   1
   1  -4   5 -1.9150 10.4254   3
  -4   1  -5 -7.3637 11.7185   2
  -1   4   5 -10.090 7.52629   1
  -1   4   5 -1.1020 12.1615   2
   4   1   5 -5.0509 9.36085   3
   1  -4   5 -2.1585 13.6802   2
  -1  -4  -5 -5.7079 15.8133   2
   4   1   5 -0.2364 11.6956   4
  -1   4   5 -11.371 12.0384   2
  -4  -1   5 -4.9089 13.3259   4
  -4   1  -5 -1.4574 13.3951   4
   1   4  -5 2.79422 10.2310   5
   4   1   5 7.77131 6.19005   5
  -4  -1   5 17.2274 11.2646   2
   1   4  -5 -18.379 12.3745   2
  -4   1  -5 1.09019 14.5402   2
   1   4   5 -0.8000 12.8920   2
   4  -1   5 6.54197 4.67645   3
  -4   1   5 -4.1610 3.86334   2
   4  -1   5 -0.8409 11.8327   4
  -1   4  -5 18.9454 15.1037   2
  -4   1   5 2.44991 12.7182   4
   4   1  -5 15.4447 9.80417   2
  -1  -4   5 19.4323 16.2645   2
  -4  -1  -5 6.14648 12.8179   2
   1  -4  -5 -5.9565 9.06071   4
  -1   4  -5 13.0170 9.32907   5
  -4  -1  -5 8.88930 9.22668   3
  -4  -1  -5 -0.0199 12.9453   2
  -1   4  -5 -3.9678 11.0741   3
   4  -1   5 18.9976 15.6931   2
  -1  -4   5 -13.650 11.7197   3
  -1   4  -5 -32.053 19.8608   1
  -4  -1  -5 3.35808 11.6079   4
   1  -4  -5 -7.4713 12.0918   2
  -3   4   5 265.018 25.9340   4
  -3  -4  -5 212.504 24.3341   3
   3  -4   5 226.788 23.8092   4
  -3  -4  -5 216.073 14.4611   4
  -4   3  -5 206.959 23.0021   2
   3   4  -5 265.969 26.2787   2
  -4   3  -5 211.879 15.1033   5
   4   3   5 199.450 17.6392   4
  -4   3  -5 236.809 11.8167   3
   4  -3  -5 203.376 23.0844   4
  -3   4   5 197.106 17.7036   2
   4   3   5 220.313 24.8265   2
  -4  -3   5 230.116 23.0230   2
  -4   3  -5 214.109 23.5362   2
   3  -4   5 217.209 23.3554   2
   3   4  -5 237.142 28.7103   1
   3   4  -5 237.656 21.8557   5
  -4  -3   5 201.955 23.6783   3
  -3   4   5 271.229 22.6600   1
  -3   4   5 219.998 17.7071   2
  -4   3  -5 218.064 27.8340   1
  -3  -4  -5 224.396 26.3969   2
   4   3   5 226.137 20.7094   5
   3  -4   5 174.612 17.1276   3
  -4  -3   5 238.231 20.2020   5
   3   4   5 258.355 23.9529   5
   4   3  -5 245.824 18.1804   5
  -4  -3  -5 217.648 28.2076   2
   3  -4  -5 177.609 20.4985   4
   4  -3   5 229.441 20.2359   2
   4   3  -5 253.503 26.8132   2
  -3  -4   5 230.429 25.1643   2
  -3  -4   5 238.635 27.4493   3
  -3   4  -5 212.210 23.6016   2
  -3   4  -5 237.923 16.7181   3
  -3   4  -5 248.751 23.8663   2
  -4   3   5 209.880 26.4682   4
   4  -3   5 225.276 27.9000   4
  -4   3   5 235.015 14.0792   2
  -4   3   5 232.952 13.6127   2
   3   4   5 281.703 30.8712   2
  -4  -3  -5 233.492 22.4024   3
  -3   4  -5 280.325 31.6115   1
  -4  -3  -5 237.801 18.1088   4
  -3   4  -5 199.358 17.3656   5
  -5   0   5 1.22536 11.0639   3
   0  -5   5 -4.4899 10.9768   3
  -5   0  -5 -14.499 6.78734   3
   5   0   5 12.1154 8.16920   3
   5   0  -5 -7.3883 16.9041   4
   0   5  -5 -9.1175 10.2025   5
   0  -5  -5 7.27902 13.4421   3
  -5   0  -5 -1.0155 11.4848   4
   0  -5  -5 -9.1125 15.4478   2
   5   0   5 8.77986 14.1884   2
  -5   0  -5 14.7131 12.0857   2
   0  -5  -5 -4.8328 7.10543   4
   5   0   5 6.27599 12.4135   4
   5   0  -5 -4.8817 5.96427   2
  -5   0  -5 -4.2248 8.74339   5
   0   5  -5 -1.2131 13.2164   2
   0   5  -5 12.0436 19.6606   1
  -5   0   5 0.93898 8.13565   2
   0   5   5 -2.7932 12.5698   2
   0  -5   5 -9.4752 13.0893   2
   0   5   5 -23.729 11.2212   1
  -5   0  -5 -2.8516 11.8006   2
  -5   0   5 -0.8355 6.97052   2
  -5  -2   5 20.4016 15.4233   3
  -5  -2   5 35.8432 15.9235   4
  -5   2  -5 7.00815 15.1170   2
  -2  -5  -5 18.6825 18.9636   2
  -5   2  -5 27.6411 5.75465   5
  -2   5   5 22.8668 12.3201   4
  -5   2  -5 14.2159 16.1221   2
  -2   5   5 20.5022 12.3230   2
   2  -5   5 21.0517 12.7496   4
   2  -5   5 27.2368 11.8638   3
   5  -2  -5 21.7467 14.6046   4
   2   5  -5 31.9647 20.6289   1
  -5   2  -5 38.2976 16.1552   1
  -2   5   5 47.4427 13.8199   2
  -5  -2   5 24.1996 13.0979   2
   2  -5   5 13.9999 14.3206   2
   5   2   5 14.9965 15.1089   2
  -5  -2   5 19.4130 12.7634   2
   5   2   5 37.4952 13.7618   4
  -2   5   5 3.40524 10.7028   1
   2   5  -5 23.2801 15.8357   2
  -5  -2   5 29.5286 8.90309   5
  -2  -5  -5 22.9284 13.8781   3
   5   2   5 30.9623 9.41230   5
   2   5  -5 18.2784 11.9455   5
   2   5   5 -10.928 14.4496   2
   2   5   5 23.9297 14.3986   5
   5  -2   5 13.5828 17.6086   4
   2  -5  -5 35.3746 11.9405   4
   5   2  -5 14.1854 12.2456   2
  -5  -2  -5 -3.6648 14.4393   2
  -5  -2  -5 28.6231 12.7080   4
  -2   5  -5 17.2189 12.7612   2
   2  -5  -5 28.9216 12.7508   2
  -2  -5   5 47.8558 15.3233   3
  -2  -5   5 38.5751 15.2025   2
   5  -2   5 14.6240 10.8298   2
  -5  -2  -5 26.3530 12.3974   3
  -2   5  -5 37.4589 23.5532   1
  -2   5  -5 14.4621 11.2345   5
  -5  -4   5 72.9798 16.7872   2
  -5   4  -5 77.1664 14.6830   2
   4  -5   5 38.8284 15.2606   4
  -5   4  -5 66.7254 8.48723   3
   5  -4  -5 72.9785 17.1516   4
  -5   4  -5 57.9691 22.1136   1
  -4  -5  -5 81.1088 18.6391   2
  -4  -5  -5 57.0259 9.37577   4
   4   5  -5 96.8421 21.3374   2
  -5   4  -5 65.4113 9.28872   5
   5   4   5 85.5053 20.3023   2
  -4   5   5 78.0454 12.7035   2
  -4   5   5 64.9572 11.5101   2
   5   4   5 73.8352 13.0429   4
  -4   5   5 69.1836 15.6828   1
  -4  -5  -5 43.2952 18.5949   3
   5   4   5 58.5478 13.8868   5
  -5  -4   5 78.6760 19.0944   3
   4  -5   5 60.0300 14.0188   2
   4   5  -5 83.6251 13.5875   5
  -5   4  -5 69.6051 15.5787   2
   4   5   5 75.7631 14.6958   5
   5  -4   5 58.9202 13.6154   2
  -5   4   5 80.4176 15.7679   1
  -4  -5   5 47.9689 17.0651   2
  -5   4   5 61.2363 8.50711   2
   4  -5  -5 88.4533 18.1379   4
  -4   5  -5 80.1339 15.5209   2
  -4   5  -5 56.7778 14.9589   2
  -4   5  -5 56.5191 23.7670   1
  -5  -4  -5 69.2251 11.3912   4
   5   4  -5 68.2287 12.3297   5
   5  -4   5 45.6558 19.6710   4
  -4   5  -5 74.1568 12.2347   5
   4   5   5 97.1068 19.3293   2
  -5  -4  -5 61.5764 17.1403   2
  -4   5  -5 82.2113 11.7297   3
  -5   4   5 53.9085 8.19173   2
   5   4  -5 100.178 19.0304   2
  -5  -4  -5 80.7151 18.1637   3
  -4  -5   5 91.4809 18.1122   3
   6   1   5 93.1829 18.9653   4
  -6  -1   5 104.002 16.9317   3
   6   1   5 137.254 18.1364   2
  -6  -1   5 113.919 15.1580   2
  -1   6   5 127.863 16.1332   1
  -6   1  -5 91.2436 10.5701   5
  -1   6   5 129.996 20.2686   2
  -6   1  -5 86.5942 10.0075   3
   1   6  -5 135.963 23.6065   2
  -1  -6  -5 101.928 18.8046   3
  -1  -6  -5 92.2057 22.3124   2
  -6  -1   5 117.997 15.4339   2
   1   6  -5 131.174 23.5083   1
   6  -1  -5 108.317 19.2934   4
   1  -6   5 104.375 17.9632   2
  -6  -1   5 98.0940 7.48066   5
  -6   1  -5 81.3108 15.2375   2
   1  -6   5 97.3859 17.4757   3
   1   6  -5 82.5132 18.0798   5
  -6   1  -5 108.091 16.1551   2
  -1  -6  -5 80.1900 10.4462   4
  -6   1   5 85.5868 10.1281   2
  -6   1   5 90.9926 13.8505   3
  -1  -6   5 98.9949 19.2642   3
   6  -1   5 126.948 18.6107   2
   6  -1   5 110.414 11.9765   3
  -6  -1  -5 111.149 13.8228   3
   1  -6  -5 62.5540 16.4732   2
   1   6   5 83.5365 16.2208   1
  -1   6  -5 99.6990 17.3006   5
   6  -1   5 73.6784 20.4477   4
  -1  -6   5 103.592 21.5973   2
   1  -6  -5 125.055 20.7072   3
   6   1  -5 80.0572 17.6340   4
  -1   6  -5 129.676 23.2377   1
  -6  -1  -5 117.041 17.8717   2
  -1   6  -5 110.117 18.8728   2
   1  -6  -5 109.293 13.9811   4
  -6   1   5 111.373 10.3588   2
   1   6   5 134.824 20.4375   2
  -6   3  -5 155.609 19.7592   2
  -6  -3   5 114.597 14.5005   5
  -3   6   5 167.686 23.3995   4
  -6   3  -5 148.133 21.4061   2
  -3  -6  -5 121.784 21.6013   2
  -3  -6  -5 95.5626 22.0807   3
  -3   6   5 149.813 18.2860   2
  -6  -3   5 120.565 21.0681   3
  -3   6   5 131.584 17.8703   2
   3   6  -5 159.225 20.5817   5
  -3   6   5 131.540 18.8279   1
  -6   3  -5 147.778 24.8561   1
   3   6  -5 182.734 23.4606   2
   6  -3  -5 150.359 21.4817   4
   3  -6   5 140.746 17.4530   3
   6   3   5 151.147 16.0982   5
   3  -6   5 118.267 19.0529   4
  -6  -3   5 161.579 20.5988   2
   6   3   5 148.692 21.7828   2
   3  -6   5 103.408 18.8300   2
   6   3   5 146.241 18.4004   4
  -3  -6  -5 136.409 10.7240   4
   3   6  -5 133.011 22.4811   1
  -6   3  -5 112.341 9.74465   5
   6  -3   5 152.922 21.6326   4
  -6  -3  -5 111.961 18.2915   4
   3  -6  -5 163.604 21.4244   4
  -3   6  -5 131.570 25.7838   1
  -6   3   5 131.535 8.30693   2
  -3   6  -5 139.217 20.4603   2
  -6  -3  -5 132.354 21.3516   2
  -3  -6   5 116.596 19.8725   3
  -6  -3  -5 114.164 18.4801   3
  -6   3   5 135.099 8.87186   2
  -3  -6   5 119.498 21.1506   2
   3  -6  -5 136.590 16.8563   2
   3   6   5 145.680 18.8241   5
   3   6   5 175.620 23.6828   2
   6   3  -5 138.273 19.1937   2
  -3   6  -5 115.432 16.2570   5
   6  -5  -5 34.6329 19.2214   4
  -6  -5   5 23.6924 18.6685   3
   6   5   5 33.2936 12.8395   5
  -5  -6  -5 45.1106 17.6901   2
  -5  -6  -5 28.5384 15.4783   3
   5   6  -5 38.4861 19.9051   2
  -6   5  -5 13.3229 11.4396   2
  -6   5  -5 8.80717 12.6749   2
  -5   6   5 10.6365 10.0924   2
   5  -6   5 -1.2213 14.1204   4
   6   5   5 51.4684 16.8874   2
  -6   5  -5 13.0642 7.21806   5
  -5  -6  -5 25.0543 9.04055   4
  -6  -5   5 15.4186 14.7923   2
   5   6  -5 34.2507 13.3704   5
  -5   6   5 40.2500 11.7971   2
  -5   6   5 25.3876 15.5660   1
   5  -6   5 24.7831 11.9387   2
  -6   5  -5 14.2969 17.1304   1
  -6   5  -5 29.7442 7.23384   3
   6  -5   5 0.82654 14.6182   4
   6   5  -5 39.7494 10.5555   5
  -5  -6   5 30.2089 18.1011   3
  -6   5   5 18.1655 14.7667   1
  -6   5   5 24.4006 8.36255   2
   5   6   5 25.0614 19.1353   2
   5   6   5 36.0436 15.0591   5
  -6  -5  -5 25.4180 17.6852   3
  -5   6  -5 22.8179 15.1918   2
  -5   6  -5 22.0397 10.4175   5
  -5  -6   5 9.04771 17.9144   2
   5  -6  -5 18.0064 8.56298   2
  -5   6  -5 25.9238 13.6317   2
  -6  -5  -5 32.4214 19.0277   2
   6   5  -5 48.9574 16.0066   2
  -6  -5  -5 28.8939 11.5935   4
   5  -6  -5 13.8645 16.3539   4
  -6   5   5 19.7098 7.95947   2
  -5   6  -5 44.7828 20.0333   1
   0  -7   5 -6.9163 16.4012   2
  -7   0   5 -9.9704 8.17448   2
  -7   0   5 -2.7578 10.3554   3
   0  -7  -5 -3.1785 8.29698   4
  -7   0  -5 5.96295 10.9876   2
   0  -7  -5 -13.091 16.3292   2
   7   0  -5 2.42966 7.30373   2
   0   7  -5 -4.0514 14.1100   5
   0  -7   5 -6.9258 12.0180   3
   0   7   5 8.73170 12.5241   1
   7   0  -5 -7.4693 14.1584   4
   0   7  -5 -2.8866 13.9312   2
  -7   0   5 7.64010 7.81307   2
  -7   0  -5 -12.434 8.58724   5
  -7   0  -5 -1.5830 11.7537   2
  -7   0  -5 -13.584 7.77413   3
   7   0   5 11.5898 13.7255   4
   7   0   5 3.92107 13.1751   2
   0   7  -5 -11.807 15.7766   1
   0   7   5 11.3100 14.1746   2
   0  -7  -5 -5.5126 16.7719   3
   2  -7   5 153.744 19.3622   3
  -7   2  -5 150.687 19.6832   2
   2  -7   5 155.320 22.2612   2
   7  -2  -5 122.505 23.5086   4
   2   7  -5 156.489 23.9301   1
  -7  -2   5 163.657 13.9728   5
  -2   7   5 161.627 21.5239   2
  -7   2  -5 192.020 23.5264   2
   7   2   5 174.647 20.9586   2
  -2   7   5 143.241 20.1191   1
  -7  -2   5 149.617 18.7409   3
  -7  -2   5 136.074 18.0226   2
   2  -7   5 161.961 21.2068   4
  -7   2  -5 128.266 9.75911   3
  -2  -7  -5 156.943 26.3436   2
  -7  -2   5 130.545 17.9093   2
   2   7  -5 149.115 19.8029   5
  -2  -7  -5 142.136 23.6591   3
  -2  -7  -5 114.899 10.7142   4
   7   2   5 184.475 21.9336   4
  -7   2  -5 130.421 10.3163   5
   2   7  -5 118.833 22.4394   2
   2   7   5 115.771 18.5369   5
  -2   7  -5 146.942 20.7689   2
   2  -7  -5 139.020 18.7465   2
  -7   2   5 150.921 16.7453   3
  -2   7  -5 210.088 27.1432   1
   2  -7  -5 146.305 17.2639   4
  -7  -2  -5 128.551 19.9718   2
  -7  -2  -5 132.338 18.7372   3
   7   2  -5 134.297 18.1520   2
  -2  -7   5 108.990 23.9857   2
  -7   2   5 126.250 9.88607   2
  -2   7  -5 138.690 18.9687   5
   7  -2   5 101.077 20.1866   4
   2   7   5 158.827 23.5763   2
  -2  -7   5 161.750 21.5612   3
  -7   2   5 151.642 9.69280   2
  -7   4  -5 50.1739 18.4105   1
   4  -7   5 21.5112 17.1181   4
  -4   7   5 61.6677 16.8297   1
  -7   4  -5 42.4164 16.0638   2
  -7   4  -5 33.5787 4.80714   3
   4   7  -5 27.1554 17.4677   2
   7   4   5 42.8944 17.9647   2
  -4  -7  -5 38.7288 16.7103   3
   7   4   5 7.39691 14.3104   4
   4   7  -5 42.9838 13.8986   5
  -4  -7  -5 45.3374 21.7240   2
  -4   7   5 33.2755 12.7975   2
  -4   7   5 14.4841 12.9272   2
   4  -7   5 38.0760 12.6198   3
  -7  -4   5 60.9297 17.8760   2
  -7  -4   5 48.2072 18.2181   3
  -7   4  -5 31.6658 6.33168   5
   7  -4  -5 14.1359 16.1817   4
   4  -7   5 37.4792 14.7403   2
  -4  -7  -5 37.5390 7.32785   4
  -7   4  -5 24.9311 14.5388   2
   7   4   5 26.0878 10.5374   5
  -7   4  -5 41.1330 5.27963   3
   4   7  -5 36.1072 19.6723   1
   7  -4   5 29.1309 16.5277   4
  -7   4   5 25.6719 6.17985   2
  -7  -4  -5 18.7995 15.4839   3
   7   4  -5 28.5227 5.97384   5
  -4   7  -5 42.3348 25.2101   1
  -4   7  -5 33.5368 12.3313   5
   4   7   5 49.0723 17.2500   5
  -7   4   5 30.5658 5.67374   2
  -4  -7   5 20.1605 19.1937   3
  -7  -4  -5 10.5074 14.0614   2
   7  -4   5 0.00073 5.56685   2
   4  -7  -5 51.8663 12.2597   2
  -4  -7   5 15.1044 19.7791   2
   7   4  -5 28.3926 15.6066   2
   4  -7  -5 -0.2276 14.5697   4
  -4   7  -5 46.3914 16.7731   2
   4   7   5 32.3760 21.3102   2
  -7  -6   5 72.3628 20.4045   3
   6  -7   5 51.1558 18.5736   4
  -7   6  -5 74.2595 9.05578   3
   7   6   5 78.8892 15.1741   5
   6  -7   5 68.6674 13.9268   2
  -6   7   5 76.4342 13.9382   2
  -6  -7  -5 57.9628 22.7039   2
  -7   6  -5 49.3686 23.9709   1
   6   7  -5 35.9242 14.1280   5
  -7   6  -5 72.6853 11.1368   5
   6   7  -5 78.1264 22.6097   2
   7   6   5 77.5215 19.5185   2
  -7  -6   5 16.7945 19.3800   2
  -6  -7  -5 106.721 13.2071   4
  -6   7   5 60.5105 18.8579   1
  -7   6  -5 75.9306 14.8573   2
  -7   6  -5 88.0651 15.3418   2
  -6  -7  -5 71.8409 18.8558   3
   7  -6  -5 39.1812 20.6985   4
  -6  -7   5 105.030 23.3907   2
   7   6  -5 77.5754 20.9020   2
   6   7   5 99.9080 23.4913   2
  -6  -7   5 76.7747 20.0815   3
   6  -7  -5 54.1639 19.9198   4
  -6   7  -5 47.1205 15.3976   2
  -7  -6  -5 65.6078 13.8846   4
   7  -6   5 25.1838 17.6396   4
  -6   7  -5 73.7500 13.1556   5
  -7   6   5 74.8027 11.1124   2
  -7   6   5 60.5738 10.9843   2
   7   6  -5 74.7145 13.6396   5
   6   7   5 103.527 18.6192   5
   6  -7  -5 65.4811 10.7203   2
  -6   7  -5 24.1862 20.0328   1
  -7  -6  -5 88.7901 23.0718   2
  -7   6   5 46.2290 17.4563   1
  -7  -6  -5 67.1216 20.7887   3
  -1  -8  -5 54.1724 17.4824   3
  -1  -8  -5 69.1924 21.9280   2
   1  -8   5 19.4476 14.7931   2
   1   8  -5 46.3343 19.0168   1
   8  -1  -5 55.6512 20.7031   4
  -1   8   5 49.3372 15.0276   1
  -8   1  -5 35.8874 13.6192   2
   1   8  -5 22.5730 13.6759   5
  -1  -8  -5 58.3553 9.48786   4
  -8  -1   5 63.1167 13.8137   2
  -8   1  -5 39.7099 13.6027   2
   1  -8   5 69.4992 17.5572   3
  -8   1  -5 56.3224 8.76524   3
  -8  -1   5 58.0303 6.77282   5
   8   1   5 29.1061 18.0849   4
  -8   1  -5 48.7996 9.16736   5
   1   8  -5 88.4460 20.6003   2
   8   1   5 33.9689 14.3818   2
  -8  -1   5 34.8452 14.2545   3
  -1   8   5 30.5011 17.9274   2
  -8  -1   5 51.8757 13.1536   2
  -1  -8   5 61.3590 18.6417   2
   1   8   5 34.5845 16.5245   5
   8  -1   5 26.2122 19.4553   4
  -8   1   5 64.1699 9.12934   2
   1  -8  -5 44.2115 16.5642   3
  -8  -1  -5 61.4511 11.9136   3
   8   1  -5 71.6345 20.7405   4
   1  -8  -5 53.2983 13.3795   4
   8  -1   5 45.6530 11.3343   2
  -8   1   5 55.7024 8.65112   2
  -8   1   5 39.7828 11.8229   3
  -8  -1  -5 45.4532 17.4515   2
  -1   8  -5 45.8774 23.0334   1
  -1  -8   5 57.8599 17.1746   3
   1  -8  -5 74.1690 19.6601   2
   1   8   5 53.1356 16.3246   1
  -1   8  -5 34.5720 15.9798   2
   1   8   5 55.8583 21.0751   2
  -1   8  -5 48.8596 16.6024   5
   3   8  -5 33.3133 18.6869   1
  -8   3  -5 53.9885 17.8588   2
   3  -8   5 35.3917 16.8760   2
  -3   8   5 30.5050 16.0223   2
  -8  -3   5 69.5071 11.8873   5
  -3  -8  -5 27.2619 17.5974   2
   3   8  -5 45.1633 19.3850   2
   3   8  -5 30.6954 16.6059   5
  -8  -3   5 59.6564 17.2776   3
   8   3   5 37.8152 15.9719   4
   8   3   5 46.9081 16.6749   2
  -3  -8  -5 9.98111 16.1310   3
  -8  -3   5 33.8140 14.7723   2
   8   3   5 44.5930 5.77461   5
  -3   8   5 48.8174 15.8500   1
  -8   3  -5 18.3180 17.8578   1
  -8   3  -5 46.8345 5.77507   3
  -8   3  -5 57.3356 16.4717   2
   3  -8   5 50.0097 14.5571   3
   8  -3  -5 57.4610 21.4382   4
   3  -8   5 34.6859 17.2333   4
  -8   3  -5 42.6360 6.05217   5
   3   8   5 58.8199 15.7833   5
  -8  -3  -5 45.3194 14.9501   3
  -3  -8   5 34.1626 19.5361   3
  -8   3   5 45.2461 6.20024   2
  -8   3   5 27.6731 11.5646   3
   3   8   5 65.1312 19.7591   2
  -8   3   5 39.6804 5.47402   2
   8  -3   5 52.9003 9.69953   2
  -3  -8   5 76.1371 18.8960   2
   3  -8  -5 51.1288 15.0335   4
  -3   8  -5 13.9932 17.5250   2
   8  -3   5 59.3880 20.9930   4
   3  -8  -5 45.0848 15.4840   2
  -8  -3  -5 64.1939 17.8728   2
  -3   8  -5 58.0084 15.1169   5
   8   3  -5 40.7659 13.7710   2
  -3   8  -5 18.6322 19.9206   1
  -5  -8  -5 58.2371 23.7314   2
  -8   5  -5 52.4058 14.5128   2
   5   8  -5 38.9846 22.5732   2
  -5  -8  -5 68.1960 19.2287   3
   8  -5  -5 12.7345 20.2622   4
  -8  -5   5 58.5793 16.8129   2
   5  -8   5 79.1031 17.1139   2
  -5   8   5 69.3054 15.3071   2
  -8   5  -5 60.8477 6.75034   3
  -5   8   5 36.4779 13.7140   2
   8   5   5 51.9371 19.6185   2
  -5   8   5 32.7650 18.5150   1
  -8   5  -5 16.2943 18.8915   1
  -8   5  -5 59.3042 6.94976   3
   8   5   5 53.2103 12.1244   5
  -5  -8  -5 49.8860 9.18320   4
  -8  -5   5 69.6411 18.3731   3
  -8   5  -5 61.8750 8.66491   5
  -8   5  -5 69.5216 17.0392   2
   5   8  -5 35.7254 14.0640   5
   5  -8   5 122.213 22.2044   4
   8   5  -5 47.4984 15.4701   2
   8  -5   5 62.7556 22.5198   4
  -8  -5  -5 59.6510 16.5141   3
  -8  -5  -5 30.6245 19.4940   2
  -5  -8   5 13.7395 17.8117   2
  -5   8  -5 30.0295 16.6192   2
   5   8   5 35.9131 15.1102   5
   5  -8  -5 38.5144 12.3397   2
  -8   5   5 96.2555 20.8138   1
   5  -8  -5 64.5351 18.9793   4
  -5  -8   5 46.6795 17.1363   3
  -5   8  -5 57.2022 13.8928   5
  -5   8  -5 57.4045 22.8651   1
   8   5  -5 56.6971 8.21914   5
  -8   5   5 53.1919 7.74372   2
  -8   5   5 49.7828 8.10239   2
   5   8   5 23.6373 18.8352   2
  -8  -7   5 9.03363 19.6090   3
  -8   7  -5 6.94114 23.7233   1
   8   7   5 27.7898 13.1517   5
   7   8  -5 48.8731 14.2674   5
   8  -7  -5 13.4127 16.6714   4
   7  -8   5 59.9165 22.0024   4
  -7   8   5 10.6889 11.3872   2
   8   7   5 -21.436 18.5950   2
  -7  -8  -5 37.9772 20.7037   3
  -7  -8  -5 26.6503 22.7291   2
   7   8  -5 8.37686 17.0196   2
   7  -8   5 32.6847 11.9499   2
  -8   7  -5 15.7120 12.3514   2
  -8   7  -5 28.6442 9.59624   5
  -7   8   5 15.7696 17.5364   1
  -8   7  -5 34.0250 10.6537   3
  -8  -7   5 5.40763 16.8908   2
  -7   8   5 10.3966 13.4228   2
  -7  -8  -5 17.6724 10.6788   4
   7   8   5 19.3942 15.1880   5
  -8   7   5 -5.6995 17.3226   1
  -8   7   5 25.0365 9.87082   2
   7   8   5 38.1938 19.8143   2
   7  -8  -5 6.37478 18.7900   4
  -8   7   5 28.1199 10.1194   2
  -7   8  -5 21.7253 21.3906   1
  -7   8  -5 -5.0476 13.3795   2
   8   7  -5 34.6803 10.4695   5
  -7  -8   5 5.51755 17.3198   2
   7  -8  -5 26.0259 10.1521   2
   8   7  -5 4.51386 19.0636   2
  -7  -8   5 12.1260 16.7519   3
  -7   8  -5 -4.1883 10.7118   5
  -8  -7  -5 30.8400 18.4009   2
  -8  -7  -5 19.7022 19.9696   3
   8  -7   5 44.4722 19.7402   4
   9   0  -5 6.54760 19.3070   4
   0  -9  -5 -18.739 13.8604   3
   0   9   5 14.4436 15.2497   5
  -9   0  -5 -9.8395 7.71682   3
   0   9  -5 -2.7326 19.2522   1
   0   9  -5 9.96223 12.8631   5
   9   0   5 -14.843 13.8427   2
   0  -9  -5 20.4569 18.7649   2
  -9   0  -5 9.85258 11.0147   5
   0  -9   5 -14.823 17.8741   2
  -9   0   5 0.51802 11.8848   3
  -9   0  -5 5.66539 11.2409   2
   9   0   5 9.91451 17.8310   4
   0   9  -5 16.0170 16.0888   2
  -9   0  -5 15.3415 12.5264   2
   0   9   5 -1.7308 14.8324   2
   0   9   5 -17.263 13.1908   1
   0  -9  -5 -9.7781 8.08525   4
  -9   0   5 7.56593 9.84471   2
   0  -9   5 15.3626 14.1853   3
  -9   0   5 -2.4186 9.21969   2
  -9   2  -5 61.0987 8.28254   5
   2  -9   5 48.7495 19.3334   2
  -2  -9  -5 37.3893 21.4743   3
   9  -2  -5 47.7082 21.7729   4
   2   9  -5 58.0532 19.8477   1
  -9  -2   5 47.6382 14.1735   2
  -2   9   5 61.5666 17.0283   1
  -2   9   5 58.3164 16.8336   2
  -9  -2   5 61.3229 14.5503   2
   2  -9   5 60.6318 17.2909   4
   2   9  -5 77.5303 19.8318   5
  -2  -9  -5 65.3179 8.96296   4
   2   9  -5 93.3472 24.5436   2
  -2  -9  -5 49.2836 19.0603   2
   2  -9   5 27.0629 16.2056   3
   9   2   5 48.1089 18.3494   4
  -9   2  -5 56.4042 16.6996   2
  -9  -2   5 57.0507 10.1465   5
  -9  -2   5 63.9574 16.8317   3
  -9   2  -5 64.9620 14.6935   2
  -9   2  -5 67.2309 8.56703   3
   9   2   5 52.9383 15.9843   2
  -2   9  -5 19.7716 15.5895   5
   2   9   5 60.6848 19.4079   5
   9   2  -5 54.1769 12.8361   2
   2   9   5 50.0502 15.9694   1
  -2   9  -5 33.7129 19.6051   2
   2  -9  -5 56.5058 13.1857   4
   9  -2   5 89.1068 22.9696   4
  -9  -2  -5 60.7296 14.3359   3
  -2  -9   5 95.6084 21.5761   3
  -9   2   5 62.1412 12.4031   3
  -2   9  -5 52.5774 25.2713   1
  -9   2   5 62.8945 7.79024   2
  -9   2   5 53.9696 8.35914   2
   2   9   5 69.2711 20.3910   2
   2  -9  -5 42.6851 15.3192   2
  -9  -2  -5 49.8210 17.0981   2
  -2  -9   5 81.9630 21.0733   2
   9  -2   5 52.4716 11.5449   2
  -9   4  -5 12.6471 14.6342   2
   9   4   5 27.9844 17.0013   2
  -9  -4   5 -8.2499 13.8608   2
   4  -9   5 6.67156 13.7728   3
   9   4   5 -19.085 13.2057   4
  -4  -9  -5 7.16825 15.3119   3
   4   9  -5 2.40510 16.8131   2
  -9   4  -5 -4.6680 19.5409   1
   4  -9   5 -13.853 16.0778   4
  -9   4  -5 -2.8719 4.98030   5
  -4  -9  -5 25.6946 19.0562   2
   9   4   5 10.2870 5.40935   5
  -4   9   5 7.21819 15.1935   1
  -9  -4   5 16.7996 16.7966   3
  -4   9   5 4.11736 14.1319   2
   4   9  -5 -0.0740 17.5197   1
   9  -4  -5 33.7112 17.2637   4
   4  -9   5 -13.566 13.8723   2
   4   9  -5 -12.216 15.2027   5
  -9   4  -5 -7.3432 13.3956   2
  -4  -9  -5 2.55334 6.14583   4
  -9  -4  -5 2.08176 13.8401   3
   4  -9  -5 5.82377 12.2334   2
  -9  -4  -5 18.5976 16.7884   2
  -9   4   5 2.58407 4.58359   2
  -4   9  -5 41.3656 25.1265   1
  -9   4   5 -5.1186 4.40662   2
   4   9   5 -2.0139 15.8170   5
   4  -9  -5 -2.7244 14.1536   4
  -9   4   5 2.90701 10.0676   3
  -4  -9   5 24.2426 16.7594   3
   9   4  -5 -1.8901 13.1021   2
   9  -4   5 18.1958 8.77423   2
   9  -4   5 10.3610 17.1599   4
  -4  -9   5 -26.729 19.0921   2
   4   9   5 -11.037 16.7583   2
  -4   9  -5 -9.9743 15.7260   2
  -4   9  -5 -10.561 12.3418   5
  -6   9   5 73.5513 22.5557   1
  -6  -9  -5 109.848 24.5731   2
  -9  -6   5 76.6398 18.9704   2
   6   9  -5 97.2901 19.6893   5
  -9   6  -5 135.170 17.9977   2
  -9   6  -5 104.467 9.88422   3
  -6   9   5 94.8591 18.7945   2
   6  -9   5 81.3307 16.7877   2
  -9  -6   5 93.3349 20.6904   3
   9   6   5 90.5329 22.2476   2
  -6  -9  -5 138.596 23.2446   3
   6   9  -5 71.5913 25.3046   2
  -9   6  -5 66.8016 22.8956   1
   9  -6  -5 88.8201 22.4584   4
   9   6   5 97.8877 14.4663   5
   6  -9   5 94.6178 23.2613   4
  -6  -9  -5 108.446 12.5986   4
  -9   6  -5 119.347 12.5893   5
  -6   9  -5 89.2865 21.9565   2
  -6   9  -5 92.0658 30.6023   1
  -9   6   5 91.4044 11.9975   2
  -6  -9   5 84.0418 22.7470   2
  -9   6   5 120.912 14.3046   2
  -9   6   5 110.541 24.3441   1
   6   9   5 83.8676 18.4807   5
   6  -9  -5 115.771 23.1464   4
  -6  -9   5 95.8789 22.8709   3
   9  -6   5 95.9731 23.0860   4
  -9  -6  -5 104.470 25.2310   2
  -9  -6  -5 101.521 22.4367   3
   6   9   5 133.775 25.7189   2
  -6   9  -5 101.157 16.7928   5
   9   6  -5 114.545 22.7798   2
  -8  -9  -5 -11.854 18.1938   2
   8   9  -5 9.01132 22.2374   2
   8  -9   5 4.32041 16.6292   4
  -9   8  -5 -4.6940 19.6565   1
  -8   9   5 -27.152 18.3403   1
   9  -8  -5 2.64056 16.9130   4
   9   8   5 28.6124 18.7497   2
  -9   8  -5 14.8658 10.1443   5
   8   9  -5 16.4467 13.2528   5
  -9  -8   5 21.1634 21.2774   2
  -9   8  -5 -2.1530 14.2896   2
  -9  -8   5 -4.2652 16.5439   3
  -8   9   5 25.8627 12.2827   2
   9   8   5 -16.007 10.4926   5
  -8  -9  -5 -18.780 19.9792   3
  -8   9  -5 21.5684 12.7661   5
   9   8  -5 42.6429 22.7053   2
   8   9   5 34.7013 16.0036   5
  -9   8   5 17.0054 17.9978   1
  -8   9  -5 4.63754 15.8451   2
   9  -8   5 -31.703 16.0246   4
   8  -9  -5 -4.6794 15.8187   4
  -8  -9   5 -11.500 20.8379   2
  -8   9  -5 30.4525 23.9815   1
  -8  -9   5 15.8951 22.5553   3
   8   9   5 27.2408 22.5917   2
  -9  -8  -5 13.5619 22.4879   2
  -9  -8  -5 14.8811 20.6312   3
  -9   8   5 12.6114 10.3495   2
   1  10  -5 10.1897 16.4344   5
   1 -10   5 -2.2105 13.2833   4
 -10   1  -5 8.65654 9.00408   5
  -1 -10  -5 13.1823 16.4195   2
 -10   1  -5 1.40958 11.8805   2
  -1  10   5 6.04358 14.4419   1
 -10  -1   5 24.7366 12.2941   2
 -10  -1   5 -9.3775 10.9543   3
  -1  10   5 0.11369 12.2485   5
 -10  -1   5 10.3569 5.93381   5
   1 -10   5 11.7662 13.6614   3
  -1  10   5 9.56466 15.5166   2
   1  10  -5 17.1888 17.7462   2
 -10  -1   5 -2.7526 10.9558   2
  10   1   5 -1.6463 14.6530   4
   1 -10   5 39.1212 16.5647   2
  -1 -10  -5 13.3219 18.5307   3
  10   1   5 7.41033 13.9766   2
   1  10  -5 10.2650 21.7956   1
 -10   1  -5 7.75524 10.6944   2
 -10   1  -5 1.88227 7.54451   3
  10  -1  -5 14.2156 20.4410   4
  -1 -10  -5 6.13094 8.71828   4
   1  10   5 3.48948 15.3816   1
  10   1  -5 -1.5013 8.64725   2
 -10  -1  -5 14.3397 9.98923   3
   1 -10  -5 10.5879 17.0029   3
   1  10   5 26.0350 14.1583   5
   1  10   5 -4.6892 15.0117   2
  10   1  -5 21.2777 20.1283   4
   1 -10  -5 -6.0625 10.3367   4
  -1  10  -5 10.3361 16.0015   2
   1 -10  -5 7.92875 14.9474   2
 -10   1   5 -6.9949 7.88525   2
 -10   1   5 6.94390 7.73949   2
  -1  10  -5 -6.4994 11.9974   5
  -1 -10   5 17.0367 19.0517   3
  10  -1   5 45.2478 18.3848   4
  -1  10  -5 -2.0976 16.7211   1
 -10   1   5 3.53838 11.1237   3
 -10  -1  -5 7.16702 13.4336   2
  -1 -10   5 -0.0952 15.7523   2
 -10   3  -5 5.85869 5.28511   3
 -10   3  -5 3.67513 16.4383   2
 -10   3  -5 0.46482 5.98007   5
  -3 -10  -5 -3.5285 19.1274   3
 -10  -3   5 -19.671 13.7720   3
  -3  10   5 7.37751 15.9315   2
   3 -10   5 -8.0389 13.0717   2
  10  -3  -5 10.9693 20.7399   4
  10   3   5 21.0595 16.8437   4
 -10   3  -5 -38.997 19.6032   1
   3  10  -5 11.4795 17.6395   2
  -3  10   5 20.8560 16.0312   1
  -3 -10  -5 -2.0700 6.31489   4
  10   3   5 15.5047 13.8829   2
  -3 -10  -5 15.8515 21.7437   2
   3  10  -5 -2.4046 21.1490   1
 -10  -3   5 12.1596 10.3731   5
 -10  -3   5 10.0023 13.6047   2
   3 -10   5 3.78329 16.0872   3
   3  10  -5 12.7604 14.3513   5
  -3  10   5 17.8779 12.9881   5
 -10   3  -5 -1.4484 11.5005   2
   3 -10   5 12.2428 16.5966   4
   3 -10  -5 10.1621 12.7530   4
   3  10   5 5.47371 14.0404   5
  -3 -10   5 -6.5356 19.7481   3
 -10   3   5 4.45090 10.2124   3
 -10  -3  -5 10.1588 15.9204   2
  10  -3   5 11.0897 7.87767   2
   3  10   5 3.16323 17.5114   2
  10  -3   5 3.45864 20.0945   4
 -10  -3  -5 12.3589 13.3821   3
 -10   3   5 14.2315 7.43127   2
  -3 -10   5 17.0800 21.5720   2
  -3  10  -5 13.5914 18.3540   2
 -10   3   5 7.32473 5.20417   2
  -3  10  -5 -19.850 17.5578   1
  -3  10  -5 -15.587 13.8718   5
  10   3  -5 5.70465 12.6310   2
   3 -10  -5 -0.4818 14.8058   2
  -5  10   5 -26.562 14.6580   1
 -10  -5   5 -17.193 16.3879   3
 -10   5  -5 -2.5408 6.21172   5
   5  10  -5 -9.2624 16.4828   5
  -5  10   5 0.70588 14.4417   2
  -5 -10  -5 18.0461 18.1611   3
 -10   5  -5 -12.258 22.4841   1
  -5 -10  -5 -2.0561 22.5840   2
 -10  -5   5 -15.559 15.8204   2
  10   5   5 -12.944 16.1248   2
  10  -5  -5 -12.293 17.4061   4
 -10   5  -5 -8.8071 11.4518   2
   5  10  -5 10.1656 18.9370   2
   5 -10   5 31.7934 18.5171   4
   5 -10   5 4.57907 13.6810   2
 -10   5   5 21.4555 15.3206   1
 -10   5   5 8.65827 5.50553   2
  -5 -10   5 4.12605 18.3437   2
  -5  10  -5 -17.606 24.0324   1
  10  -5   5 -0.1201 20.2065   4
   5 -10  -5 5.40220 16.1104   4
  10   5  -5 6.75342 14.0198   2
  -5  10  -5 -3.0397 13.0114   5
   5  10   5 31.4208 19.3729   2
 -10  -5  -5 -9.6113 16.8754   2
 -10   5   5 4.67438 5.00580   2
  -5 -10   5 -4.2287 16.6764   3
 -10  -5  -5 1.33577 15.8358   3
  -5  10  -5 -10.174 14.9775   2
   5 -10  -5 -14.211 12.0374   2
 -10   5   5 -6.7084 9.48968   3
   5  10   5 -22.239 15.9894   5
 -10  -7   5 1.16073 16.1642   2
  10  -7  -5 89.4322 26.8652   4
   7  10  -5 15.3736 15.5491   5
  -7 -10  -5 27.5907 20.2582   2
   7 -10   5 45.3162 21.9709   4
   7  10  -5 30.9658 20.4942   2
  -7  10   5 22.9503 15.4275   2
  10   7   5 -8.0467 15.7712   2
 -10  -7   5 -8.2678 19.9186   3
 -10   7  -5 29.0676 25.1037   1
 -10   7  -5 30.6421 13.7298   2
  -7  10   5 13.2299 20.5402   1
  -7 -10  -5 20.2103 19.3611   3
 -10   7  -5 30.4260 9.48099   5
 -10   7   5 -4.7754 19.4044   1
  10  -7   5 41.2584 20.3895   4
  -7 -10   5 17.4056 19.5222   2
   7  10   5 17.5992 19.0013   2
  -7  10  -5 10.3018 15.8733   2
  -7  10  -5 -12.411 23.1430   1
 -10  -7  -5 -5.7558 20.3742   2
   7 -10  -5 17.3221 16.7967   4
  -7  10  -5 5.25094 12.6154   5
 -10   7   5 11.8288 7.30986   2
  10   7  -5 9.77878 18.0116   2
   7  10   5 24.7471 16.8906   5
  -7 -10   5 30.4835 23.3910   3
 -10  -7  -5 60.1120 18.8108   3
 -10  -9   5 1.75283 17.9097   3
  -9 -10  -5 3.44417 17.5225   3
   9  10  -5 9.01181 22.8871   2
  -9  10   5 6.64438 22.7053   1
   9 -10   5 -2.0797 18.3494   4
 -10  -9   5 12.4392 17.8493   2
  -9  10   5 23.6285 13.4966   2
  10  -9  -5 -0.1524 22.7508   4
 -10   9  -5 1.73051 29.1478   1
  10   9   5 -11.136 22.0464   2
 -10   9  -5 19.2418 11.7292   5
 -10   9  -5 -6.3303 13.8349   2
  -9 -10  -5 14.6317 25.2128   2
   9  10   5 32.5091 14.9974   5
  -9  10  -5 12.6879 17.0319   2
  -9 -10   5 -23.535 21.1500   2
  10   9  -5 26.4521 20.7795   2
   9 -10  -5 2.89083 21.5389   4
 -10  -9  -5 -13.015 21.9610   2
  -9  10  -5 0.70738 31.0894   1
 -10   9   5 -0.9594 21.9613   1
   9  10   5 -15.812 18.7115   2
  10  -9   5 -9.8354 21.3942   4
  -9  10  -5 3.43136 13.4897   5
  -9 -10   5 20.6337 19.5907   3
 -10   9   5 32.2075 11.6367   2
 -10  -9  -5 -2.7086 15.9793   3
   0  11  -5 -22.441 15.7162   5
 -11   0   5 16.7429 10.2350   2
 -11   0  -5 12.4385 15.2341   2
   0 -11   5 -16.700 14.6017   3
   0  11   5 21.2875 21.0665   2
 -11   0  -5 6.74560 10.9607   3
   0 -11  -5 15.8640 19.9504   3
   0 -11  -5 2.67397 9.36938   4
  11   0   5 11.7665 15.9878   4
   0  11   5 -12.909 15.5396   5
 -11   0   5 -4.7092 4.07057   5
   0 -11   5 -17.069 14.0568   4
   0 -11   5 0.24677 16.5547   2
   0  11  -5 16.3483 23.0564   1
   0  11   5 -11.943 14.7330   1
   0  11  -5 13.5384 16.8268   2
 -11   0   5 25.6239 12.9089   3
   0 -11  -5 -17.156 18.6834   2
 -11   0   5 -3.3828 5.75092   5
 -11   0  -5 -11.588 14.9466   5
  11   0  -5 0.58266 15.7247   4
   2  11  -5 78.8970 25.8282   2
 -11   2  -5 49.1152 9.65679   5
   2 -11   5 75.4037 17.4488   3
  -2  11   5 56.7811 17.9823   5
   2 -11   5 42.8484 18.5832   2
  -2 -11  -5 72.1056 10.6548   4
 -11  -2   5 82.5999 17.6783   2
   2  11  -5 54.5077 24.7376   1
  -2 -11  -5 22.7531 17.8127   3
 -11  -2   5 41.9719 18.4951   3
 -11   2  -5 45.4750 17.7362   2
  11   2   5 59.8966 16.1118   2
  -2  11   5 66.6720 20.9349   2
  11   2   5 55.5412 22.3352   4
   2  11  -5 51.9413 18.6219   5
  11  -2  -5 65.8731 21.4377   4
  -2  11   5 71.3309 19.2809   1
   2 -11   5 79.4155 18.9195   4
 -11   2  -5 42.8556 9.36523   3
  -2 -11  -5 0.40016 22.4077   2
 -11  -2  -5 57.5811 16.1383   3
   2 -11  -5 72.2625 16.7402   4
  11  -2   5 49.4427 20.2229   4
   2  11   5 55.7119 17.8302   5
  -2  11  -5 58.6445 21.4997   1
  -2  11  -5 46.3134 22.2211   2
 -11   2   5 51.6421 13.4667   3
  -2 -11   5 57.2109 22.0532   2
 -11   2   5 59.0011 9.60891   2
 -11   2   5 47.6417 10.1527   2
   2 -11  -5 67.3129 20.8713   2
 -11  -2  -5 20.3062 18.6435   2
   2  11   5 36.1374 20.8319   2
   2  11   5 74.9043 21.2271   1
  -2 -11   5 57.9427 20.2928   3
  -2  11  -5 47.9431 18.5935   5
 -11  -4   5 13.7386 16.9222   3
  -4  11   5 -8.9170 18.9638   1
 -11  -4   5 -0.5169 17.3519   2
  11   4   5 14.4025 15.1553   2
  -4 -11  -5 37.8779 19.3671   3
  11  -4  -5 -4.2692 17.4618   4
   4 -11   5 -7.3566 15.5078   2
   4  11  -5 -11.350 18.7003   1
 -11   4  -5 -7.6634 6.24391   5
   4  11  -5 24.5363 20.0613   2
  -4  11   5 -9.1741 16.3538   2
   4 -11   5 7.11005 13.8056   3
 -11   4  -5 25.9727 16.7762   2
   4  11  -5 -3.3767 17.8591   5
  -4 -11  -5 22.2648 19.3655   2
  11   4   5 21.9394 17.3092   4
 -11   4  -5 14.3091 19.3603   1
  -4  11   5 5.21405 13.3415   5
   4 -11   5 11.1724 16.8012   4
   4 -11  -5 -8.8290 16.9305   4
 -11  -4  -5 -4.2474 13.4144   2
  -4  11  -5 -7.9933 24.5336   1
  -4 -11   5 6.25366 21.6602   3
 -11   4   5 4.56096 4.78722   2
  11  -4   5 8.30510 22.3833   4
   4 -11  -5 10.4034 14.1450   2
   4  11   5 -2.3780 23.2647   2
  -4  11  -5 27.3231 19.1761   2
 -11   4   5 9.79834 4.80484   2
  -4  11  -5 1.27193 15.5540   5
 -11  -4  -5 22.3922 15.4477   3
 -11   4   5 4.25993 10.3617   3
   4  11   5 5.20636 17.8857   5
  -4 -11   5 16.3425 19.8187   2
  -6  11   5 19.5323 19.8988   1
  -6  11   5 5.91820 13.8564   5
  11   6   5 -12.853 17.6704   2
 -11   6  -5 -18.813 18.9825   1
  -6 -11  -5 -12.196 21.0150   3
 -11  -6   5 5.90762 18.5672   3
 -11   6  -5 -12.832 11.1906   2
   6  11  -5 -12.430 22.3528   2
 -11  -6   5 30.4412 19.6965   2
   6  11  -5 5.38543 17.3972   5
 -11   6  -5 2.53400 7.43459   5
   6 -11   5 -18.330 14.1489   4
  -6  11   5 8.89868 15.2203   2
  -6 -11  -5 11.6437 19.5403   2
  11  -6  -5 29.3658 20.4213   4
   6 -11  -5 -8.6066 17.6558   4
 -11   6   5 6.79349 5.55158   2
  -6 -11   5 -6.2785 22.1283   3
  -6  11  -5 -13.054 14.0469   5
 -11   6   5 -23.700 13.9343   1
  11   6  -5 -6.9184 15.3400   2
  -6 -11   5 -6.6702 18.7118   2
  -6  11  -5 -1.0025 16.0307   2
 -11   6   5 -6.1021 10.3136   3
   6  11   5 -5.1890 15.1258   5
  11  -6   5 11.5668 22.6556   4
 -11  -6  -5 -2.3999 15.8118   2
 -11  -6  -5 -16.067 16.1379   3
   6  11   5 5.02713 19.9060   2
  -6  11  -5 -0.1086 26.7868   1
  -8  11   5 -3.3973 20.9479   1
  -8  11   5 17.4212 11.6643   5
  11   8   5 -15.648 14.8996   2
 -11  -8   5 9.67791 16.9384   3
 -11   8  -5 -2.0206 27.7623   1
  -8 -11  -5 4.07826 19.7381   2
  -8  11   5 -28.016 13.5592   2
   8  11  -5 -57.484 20.5530   2
 -11   8  -5 -1.2525 12.2246   2
   8  11  -5 -6.6972 13.4824   5
  11  -8  -5 -24.006 21.9604   4
  -8 -11  -5 -4.6700 17.7464   3
 -11  -8   5 22.1583 21.7669   2
 -11   8  -5 -16.806 9.59663   5
   8 -11   5 8.41790 21.0427   4
  -8  11  -5 -14.345 14.5031   5
  11  -8   5 -23.254 23.9698   4
 -11   8   5 -3.6105 7.99466   2
  -8  11  -5 11.8113 16.0336   2
   8  11   5 18.1728 17.2734   5
 -11   8   5 22.6390 18.0715   1
 -11  -8  -5 3.13843 21.9265   2
   8 -11  -5 -2.2320 16.2390   4
  -8 -11   5 -9.5651 22.7256   3
 -11  -8  -5 -4.0489 19.4150   3
  -8  11  -5 29.5399 25.2993   1
  11   8  -5 0.40682 18.2774   2
  -8 -11   5 36.0358 21.4371   2
   8  11   5 19.2310 21.1299   2
 -10  11   5 2.65814 25.2224   1
 -11 -10   5 15.7441 19.8785   3
 -11  10  -5 -6.5952 30.4281   1
  10 -11   5 -3.4105 19.1311   4
 -10 -11  -5 8.93793 21.6592   2
 -10  11   5 -6.4216 13.1760   2
  11 -10  -5 -17.585 19.4798   4
 -11 -10   5 2.27084 18.3235   2
  11  10   5 -3.7552 22.3408   2
 -11  10  -5 -1.9998 15.0380   2
 -10 -11  -5 12.6244 23.3064   3
 -10  11   5 15.7767 10.5854   5
  10  11  -5 -26.376 21.9533   2
 -11  10  -5 2.65458 12.4362   5
  10 -11  -5 -15.187 22.1227   4
  10  11   5 -10.720 18.6457   2
  11 -10   5 0.45938 25.5167   4
 -11  10   5 16.5888 11.3483   2
 -11  10   5 -12.426 22.1551   1
 -10 -11   5 -31.831 16.2649   3
 -10  11  -5 12.7891 15.3307   2
  11  10  -5 19.5009 22.5686   2
 -11 -10  -5 22.2984 21.6675   2
 -10  11  -5 8.41063 14.4587   5
 -10 -11   5 3.29536 24.6141   2
 -11 -10  -5 -5.5608 17.7185   3
 -10  11  -5 -10.533 32.2621   1
 -12   1  -5 36.3571 10.9441   3
   1  12  -5 44.5756 18.0536   5
 -12  -1   5 29.9448 14.0357   2
  -1  12   5 22.0306 18.4013   5
   1  12  -5 37.7852 20.8181   2
  -1  12   5 53.6737 19.6619   1
   1 -12   5 36.2949 17.8510   4
 -12   1  -5 56.6660 16.9366   2
  12  -1  -5 29.9021 23.5033   4
 -12  -1   5 37.4238 15.4655   3
  -1  12   5 23.7524 18.0101   2
  -1 -12  -5 47.8008 24.2218   2
  -1 -12  -5 109.342 25.9937   3
   1 -12   5 23.4418 18.9803   3
   1 -12   5 68.1155 21.6946   2
  -1 -12  -5 40.5231 11.2009   4
 -12   1  -5 41.1267 14.2958   5
  12   1   5 44.7825 19.2053   4
   1  12  -5 -10.105 22.7668   1
  -1 -12   5 63.3304 23.5957   3
   1 -12  -5 33.2048 13.1019   4
  12   1  -5 14.2470 19.1615   4
   1  12   5 52.9632 21.6050   2
 -12  -1  -5 73.7610 19.6848   2
   1 -12  -5 83.3047 24.3260   2
  -1  12  -5 32.8068 24.1828   1
   1  12   5 42.8797 17.8877   5
  12  -1   5 25.7808 23.4663   4
  -1 -12   5 69.2795 21.6060   2
  -1  12  -5 47.7484 20.9199   2
   1  12   5 57.9862 20.1136   1
 -12   1   5 32.6248 11.5685   2
 -12   1   5 43.5374 14.4416   3
   1 -12  -5 48.2876 22.0678   3
  -1  12  -5 38.6726 16.7762   5
 -12  -1  -5 31.0639 13.4225   3
 -12  -3   5 10.4379 15.7261   3
  -3  12   5 -3.7341 17.0618   1
   3  12  -5 22.0753 24.1625   1
  12   3   5 37.9477 20.5138   4
  -3  12   5 9.12274 16.4423   5
  -3 -12  -5 -3.6118 23.0069   2
   3 -12   5 43.1877 20.0272   2
 -12  -3   5 25.0920 14.9515   2
 -12   3  -5 -36.427 22.9335   1
  -3 -12  -5 16.1406 22.1669   3
   3  12  -5 41.7889 19.9277   5
 -12   3  -5 34.8397 9.87465   5
   3  12  -5 33.7548 25.0822   2
 -12   3  -5 10.1069 17.5808   2
   3 -12   5 23.5167 19.9529   4
  12  -3  -5 21.5097 19.6709   4
   3 -12   5 17.6189 16.7864   3
  -3  12   5 34.6555 19.8389   2
 -12  -3  -5 37.2958 15.2528   3
  12  -3   5 7.06241 24.1461   4
 -12   3   5 12.7467 9.02449   2
 -12   3   5 38.1372 12.8105   3
  -3  12  -5 14.5463 20.0870   1
   3  12   5 32.3577 20.0484   5
  -3  12  -5 16.5347 17.7079   5
   3 -12  -5 10.7314 17.5811   2
  -3  12  -5 40.5562 22.1854   2
   3 -12  -5 38.6618 15.8481   4
  -3 -12   5 25.1880 22.8329   3
 -12  -3  -5 -10.686 18.5953   2
   3  12   5 35.0404 24.6808   2
  -3 -12   5 44.2187 21.8201   2
  -5  12   5 0.27339 16.7946   2
 -12  -5   5 25.9948 18.5084   2
  -5  12   5 -12.751 17.9013   1
   5  12  -5 -1.9216 23.1679   2
 -12   5  -5 -13.803 19.6903   1
  -5 -12  -5 -17.365 18.2546   3
  12  -5  -5 -6.8153 17.3963   4
   5  12  -5 -3.1246 18.4601   5
  -5  12   5 29.4330 17.3959   5
   5 -12   5 18.1891 19.5067   4
  -5 -12  -5 24.4857 25.5341   2
 -12  -5   5 17.1282 18.7615   3
 -12   5  -5 1.62409 7.90451   5
 -12   5  -5 -8.4927 11.7464   2
  -5  12  -5 2.30690 19.1186   2
  12  -5   5 -54.375 14.8347   4
  -5  12  -5 -3.5931 15.3081   5
  -5 -12   5 18.1326 20.0687   3
   5  12   5 -7.7282 19.9578   2
   5 -12  -5 4.40308 16.4681   4
 -12   5   5 -4.8003 19.4822   1
 -12  -5  -5 -11.708 15.6148   3
  -5  12  -5 56.3285 29.0831   1
   5  12   5 5.41137 16.0722   5
 -12  -5  -5 -5.9286 17.2742   2
 -12   5   5 14.3895 11.9875   3
  -5 -12   5 6.11339 19.3557   2
   7 -12   5 9.90492 20.6592   4
 -12  -7   5 -24.216 18.5599   3
  -7  12   5 3.10417 20.7904   1
 -12   7  -5 2.51987 13.5204   2
  -7 -12  -5 -17.921 24.3382   2
  -7  12   5 16.0945 17.7327   2
  -7 -12  -5 -9.1651 18.7805   3
 -12   7  -5 20.2081 23.0011   1
   7  12  -5 40.1361 19.4521   5
  12  -7  -5 -25.383 18.2647   4
 -12  -7   5 15.9863 17.4838   2
   7  12  -5 -1.2880 20.0793   2
 -12   7  -5 4.21583 9.63389   5
  -7  12   5 2.83735 14.5932   5
 -12   7   5 4.89770 5.94854   2
  -7 -12   5 42.3807 23.4822   2
   7  12   5 33.0728 19.3464   5
 -12  -7  -5 -7.2855 19.4504   3
   7 -12  -5 12.7369 20.0267   4
  -7  12  -5 1.78644 17.4006   2
 -12   7   5 -9.9414 20.9091   1
   7  12   5 43.3937 23.3405   2
  -7  12  -5 12.6593 28.4519   1
  -7 -12   5 38.4436 25.8178   3
 -12  -7  -5 -12.057 20.1083   2
  -7  12  -5 2.51099 15.5377   5
  12  -7   5 -15.768 23.7422   4
 -12  -9   5 0.78199 18.1530   3
  12  -9  -5 43.7745 22.7172   4
   9  12  -5 56.0079 27.5548   2
 -12   9  -5 24.1429 31.4740   1
  -9  12   5 24.7955 14.3528   2
   9 -12   5 43.7241 20.5279   4
 -12   9  -5 55.2889 15.8787   2
 -12  -9   5 14.2314 23.9858   2
  -9 -12  -5 35.0540 21.6201   3
  -9  12   5 18.7101 14.1614   5
  -9  12   5 21.0585 25.5191   1
 -12   9  -5 29.0184 11.6879   5
  -9 -12  -5 51.9844 29.6623   2
   9  12   5 50.8109 24.2676   2
   9 -12  -5 39.0245 20.1007   4
 -12   9   5 29.5398 9.73822   2
  -9 -12   5 46.6795 22.7843   3
 -12  -9  -5 28.3820 21.4869   3
  -9  12  -5 24.9570 19.5998   2
  -9  12  -5 36.0567 17.8484   5
 -12  -9  -5 43.7747 25.7517   2
  -9 -12   5 57.8661 24.7195   2
  12  -9   5 3.33544 25.1370   4
  -9  12  -5 8.19139 32.1427   1
 -12   9   5 5.12261 18.8999   1
 -12  11  -5 21.4914 28.3223   1
 -11  12   5 8.94337 13.7354   5
  11 -12   5 9.70751 21.6831   4
 -12  11  -5 43.7165 15.3821   5
 -11 -12  -5 12.6023 20.6937   3
 -11 -12  -5 34.6518 24.1997   2
  12 -11  -5 61.9872 27.0354   4
 -12 -11   5 53.6151 26.1913   3
 -11  12   5 23.8373 28.1765   1
 -12  11  -5 20.0554 16.2210   2
 -11  12   5 27.3993 13.5127   2
 -12 -11   5 15.3731 25.9853   2
  11 -12  -5 -2.6549 23.9873   4
 -12  11   5 24.9121 12.3019   5
 -11 -12   5 33.4011 24.1219   2
 -11  12  -5 1.35110 27.2593   1
 -12  11   5 18.5659 27.5335   1
 -12 -11  -5 20.7599 26.4393   2
 -11 -12   5 -14.878 23.8572   3
 -11  12  -5 16.2786 14.3467   5
 -12  11   5 11.7071 10.8804   2
 -12 -11  -5 9.25777 24.1166   3
  12 -11   5 3.55429 20.9637   4
  11  12   5 56.6875 24.1405   2
 -11  12  -5 30.9136 18.2813   2
 -13   0   5 -14.287 9.90811   3
   0 -13  -5 4.19689 21.6940   2
  13   0   5 17.7981 21.4595   4
 -13   0   5 1.57424 12.3314   2
   0 -13   5 9.28121 13.1156   4
   0 -13   5 6.84092 21.9943   2
 -13   0  -5 -24.737 14.2261   2
   0  13   5 14.4530 21.9371   1
   0  13  -5 -29.106 18.0817   5
   0  13   5 -15.933 20.5249   2
 -13   0  -5 -5.6720 13.9320   3
   0 -13  -5 -16.574 21.1199   3
   0  13  -5 51.4642 21.2813   2
  13   0  -5 1.81534 19.1304   4
   0  13   5 3.40928 17.9064   5
   0 -13   5 -13.971 18.6540   3
   0  13  -5 21.2284 23.5171   1
  -2  13   5 39.1616 19.5310   5
  -2  13   5 18.1244 21.0800   2
   2  13  -5 2.77477 20.1295   5
 -13  -2   5 44.5820 16.7507   3
  13  -2  -5 0.10944 23.2608   4
   2  13  -5 12.3910 21.0975   2
  -2  13   5 70.4439 20.1963   1
 -13   2  -5 12.0806 17.4568   2
   2 -13   5 31.2342 16.5405   4
   2  13  -5 48.7659 22.1010   1
   2 -13   5 51.5385 21.4176   3
 -13  -2   5 24.6767 13.4007   2
  13   2   5 48.9545 19.3472   4
 -13   2  -5 32.7004 12.7193   5
   2 -13   5 -7.5412 16.5214   2
  -2 -13  -5 2.18711 22.2104   3
  -2 -13  -5 -1.1846 19.7491   2
   2 -13  -5 40.1870 19.7087   2
  -2  13  -5 57.6427 25.2369   1
 -13   2   5 30.9164 10.9358   2
   2  13   5 -25.390 22.6515   2
  -2  13  -5 27.6194 23.5375   2
   2  13   5 33.4231 21.7004   5
 -13  -2  -5 24.9967 13.2583   3
  -2 -13   5 55.5015 23.9459   3
  -2 -13   5 14.9743 20.6172   2
  -2  13  -5 32.7618 19.8335   5
 -13  -2  -5 52.6319 20.1710   2
   2 -13  -5 16.5870 14.7362   4
  13  -2   5 6.53447 23.5189   4
 -13   2   5 27.2969 12.8527   3
 -13   4  -5 103.469 26.9034   1
  -4 -13  -5 49.9440 21.2571   3
 -13  -4   5 66.3241 19.0402   2
  -4 -13  -5 51.9608 24.2647   2
   4 -13   5 44.8144 19.0136   3
  13  -4  -5 81.1043 23.7091   4
   4  13  -5 56.2399 23.2955   5
  -4  13   5 52.9715 22.0324   2
 -13   4  -5 36.0442 18.0561   2
   4  13  -5 58.1983 28.9630   2
  -4  13   5 44.3657 18.9789   5
   4 -13   5 71.2841 21.5590   4
   4  13  -5 48.8150 23.5828   1
  -4  13   5 32.9133 20.1313   1
 -13  -4   5 75.0446 21.1374   3
  13   4   5 34.7789 22.0733   4
 -13   4  -5 47.9731 11.1004   5
   4 -13  -5 73.9279 19.9868   4
   4  13   5 49.6541 22.8405   2
 -13  -4  -5 48.7463 20.7574   2
  -4  13  -5 49.7906 23.8928   2
  -4 -13   5 99.0572 28.3941   3
  -4  13  -5 72.5750 29.0628   1
  -4  13  -5 40.4800 19.7752   5
  13  -4   5 65.7887 27.5659   4
   4  13   5 60.0185 20.2048   5
 -13  -4  -5 40.0713 17.7109   3
  -4 -13   5 53.2904 22.8876   2
  -6  13   5 4.98268 16.8692   2
  -6  13   5 6.33415 23.5339   1
  13  -6  -5 29.3669 26.3292   4
   6  13  -5 4.45994 21.7060   2
   6  13  -5 -12.111 16.9708   5
 -13  -6   5 20.1412 20.3265   2
 -13   6  -5 23.6066 22.9382   1
   6 -13   5 -4.1373 19.9557   4
  -6  13   5 -10.980 14.3788   5
 -13  -6   5 0.50555 18.6772   3
 -13   6  -5 -11.686 12.2663   2
 -13   6  -5 0.38996 8.70989   5
  -6 -13  -5 15.7907 24.7712   3
  -6 -13  -5 15.3831 20.7868   2
  -6  13  -5 33.5010 29.0030   1
  -6  13  -5 0.58560 17.5739   5
  -6 -13   5 -20.337 23.7937   3
 -13  -6  -5 24.3082 19.5197   3
   6  13   5 31.0197 23.5821   2
  13  -6   5 56.6024 26.3724   4
   6  13   5 -14.116 18.6665   5
  -6  13  -5 24.6084 19.7177   2
 -13  -6  -5 7.39458 19.7478   2
   6 -13  -5 -37.707 17.1764   4
  -6 -13   5 0.08911 19.6568   2
 -13   6   5 -39.175 19.5304   1
  13  -8  -5 51.6657 23.9069   4
 -13   8  -5 2.23851 23.4568   1
 -13   8  -5 30.3887 13.0954   2
   8 -13   5 72.3573 24.7627   4
 -13  -8   5 78.8925 24.7602   3
  -8 -13  -5 15.1344 21.2141   3
 -13   8  -5 32.4236 11.7354   5
  -8 -13  -5 47.9320 29.1257   2
  -8  13   5 11.4512 18.2881   2
  -8  13   5 19.7350 16.9935   5
  -8  13   5 35.7825 24.9208   1
 -13  -8   5 9.66245 22.3274   2
   8  13  -5 -15.867 25.5538   2
   8  13   5 35.3591 28.9419   2
  -8  13  -5 41.7250 31.0747   1
   8 -13  -5 53.0325 20.0519   4
   8  13   5 35.9584 20.9348   5
  13  -8   5 42.7929 27.4183   4
 -13  -8  -5 20.3560 24.1046   2
 -13  -8  -5 -2.0746 21.2480   3
  -8  13  -5 45.7904 20.9649   2
  -8 -13   5 33.4680 27.7852   3
  -8  13  -5 64.4711 19.3794   5
 -13   8   5 32.1297 20.7005   1
  -8 -13   5 -22.303 20.1486   2
  13 -10  -5 10.5520 25.2299   4
 -10  13   5 -1.0773 14.2452   5
 -10 -13  -5 -51.220 21.5624   3
 -13  10  -5 18.3316 12.7323   5
 -13 -10   5 -55.820 16.2057   2
 -13  10  -5 31.5964 32.9926   1
  10  13  -5 9.39972 27.0413   2
  10 -13   5 26.6343 24.4201   4
 -10  13   5 10.3232 15.4292   2
 -10 -13  -5 6.60408 27.2476   2
 -13  10  -5 5.62340 14.7630   2
 -13 -10   5 39.0693 21.1461   3
 -10 -13   5 2.32374 21.3913   2
  10  13   5 -11.081 21.6564   2
 -10 -13   5 -23.687 24.8882   3
 -13 -10  -5 -9.2910 19.3026   2
 -10  13  -5 -2.0821 15.1191   5
 -10  13  -5 1.71666 18.4779   2
 -13 -10  -5 -9.1178 22.0019   3
 -10  13  -5 -17.084 32.0632   1
  13 -10   5 30.5962 21.7465   4
  10 -13  -5 10.0307 22.8363   4
 -13  10   5 19.4412 26.3109   1
  13 -12  -5 60.9213 29.8756   4
 -12 -13  -5 3.47953 24.0870   3
 -13  12  -5 -7.2877 14.3227   2
 -13 -12   5 67.8938 28.4753   3
 -13 -12   5 28.5081 26.8423   2
 -13  12  -5 15.4789 36.4167   1
  12 -13   5 50.4667 27.2046   4
 -13  12  -5 30.8853 16.2320   5
 -12 -13  -5 29.5452 29.2405   2
 -12  13   5 8.22286 13.4744   5
 -12  13   5 32.5099 17.4916   2
 -13 -12  -5 -1.0102 23.9584   3
  12 -13  -5 17.1803 24.3599   4
 -12  13  -5 41.4212 18.8816   5
 -12 -13   5 -7.4469 22.8008   2
 -12 -13   5 23.0336 21.8610   3
 -12  13  -5 -41.024 34.2261   1
 -13 -12  -5 31.5690 27.6070   2
 -12  13  -5 15.4222 17.2455   2
  13 -12   5 20.0043 27.7375   4
   1  14  -5 7.43265 25.6022   2
 -14   1  -5 34.1137 17.6303   2
 -14  -1   5 -10.191 12.4283   3
   1 -14   5 27.8951 17.7193   3
  -1  14   5 17.4244 21.7006   2
  -1  14   5 25.1499 20.1981   5
  -1  14   5 -7.0267 18.1114   1
   1 -14   5 19.4935 15.0525   4
  14  -1  -5 -21.744 18.5657   4
 -14  -1   5 1.52246 13.2885   2
 -14   1  -5 0.85092 16.3235   5
  -1 -14  -5 -3.8396 22.8112   3
  14   1   5 35.5970 23.7094   4
   1 -14   5 -8.9155 23.0145   2
   1  14  -5 15.4797 21.2105   1
  -1 -14  -5 -13.286 24.1434   2
   1  14  -5 35.6494 19.1126   5
  -1 -14   5 6.19230 17.8086   4
  -1  14  -5 -5.1837 20.2122   1
   1  14   5 6.75667 19.1672   1
 -14   1   5 21.4117 10.8490   2
   1  14   5 -20.358 19.6179   2
 -14  -1  -5 38.0720 17.5677   2
  -1  14  -5 20.4098 23.5896   2
  -1 -14   5 10.6593 20.4763   2
   1  14   5 9.25356 20.8054   5
  -1  14  -5 13.1507 20.0272   5
 -14   1   5 -6.4740 9.26078   5
  14  -1   5 51.5210 21.7409   4
   1 -14  -5 -38.255 18.6121   2
 -14   1   5 -3.1285 10.7282   3
  -1 -14   5 23.4968 19.0446   3
   3  14  -5 48.4316 27.7888   1
  14  -3  -5 41.7192 23.7740   4
   3  14  -5 77.6029 29.3465   2
 -14   3  -5 22.8961 17.4876   2
  -3 -14  -5 15.1438 25.6516   3
  -3  14   5 40.7530 20.2452   5
 -14   3  -5 65.3114 25.4814   1
   3 -14   5 19.1794 19.9907   4
  14   3   5 59.7846 25.1289   4
  -3  14   5 23.7130 19.9810   1
   3 -14   5 39.7911 20.9890   3
 -14  -3   5 40.6673 16.4945   2
 -14  -3   5 32.2640 17.8073   3
  -3  14   5 61.7772 24.3312   2
 -14   3  -5 24.3221 12.9480   5
  -3 -14  -5 2.05796 26.0959   2
   3  14  -5 16.9005 22.4870   5
  -3  14  -5 29.5115 19.9555   5
 -14  -3  -5 27.1979 18.0818   3
 -14   3   5 35.8599 10.0444   2
  -3  14  -5 64.7853 26.7630   1
  -3  14  -5 -13.499 21.6555   2
  -3 -14   5 49.4187 26.3596   3
 -14  -3  -5 22.1986 18.8279   2
  14  -3   5 40.1950 25.8548   4
   3  14   5 53.8160 23.7001   2
  -3 -14   5 -18.071 18.7968   2
   3  14   5 -2.7560 21.8065   5
  -5  14   5 -3.7703 18.6244   2
  -5 -14  -5 -15.658 23.6104   3
   5  14  -5 -23.686 19.7418   5
   5  14  -5 3.67920 22.1352   2
  -5 -14  -5 1.08868 20.8926   2
 -14   5  -5 -14.066 26.9236   1
 -14   5  -5 7.99315 10.0756   5
 -14  -5   5 4.63949 18.1792   3
 -14   5  -5 -10.104 12.7817   2
  -5  14   5 23.2228 19.4261   1
  -5  14   5 -0.3952 16.7337   5
  14  -5  -5 -19.347 20.8629   4
 -14  -5   5 -8.9923 16.4977   2
   5 -14   5 11.6469 19.6952   4
   5 -14  -5 27.6792 17.5522   4
  -5 -14   5 2.47022 20.6535   2
   5  14   5 35.5061 28.7916   2
 -14  -5  -5 -4.2370 19.4824   3
  14  -5   5 -28.915 23.4847   4
 -14   5   5 -9.6105 18.8016   1
   5  14   5 2.87175 21.2599   5
 -14  -5  -5 7.05689 20.1760   2
  -5 -14   5 -18.365 23.8801   3
  -5  14  -5 18.0243 15.6010   5
  -5  14  -5 28.9270 21.5337   2
  -5  14  -5 16.8930 23.6808   1
 -14  -7   5 55.3589 22.8620   3
  -7 -14  -5 15.5520 22.4483   2
   7  14  -5 13.0282 28.6954   2
 -14   7  -5 44.4379 13.5633   2
  -7  14   5 5.90751 18.0508   5
  14  -7  -5 85.6143 29.6045   4
   7  14  -5 14.5983 20.4447   5
   7 -14   5 30.5511 22.0635   4
 -14   7  -5 20.4339 29.6876   1
 -14   7  -5 27.7600 10.7391   5
  -7 -14  -5 28.4552 26.8527   3
  -7  14   5 26.3646 19.3768   2
 -14  -7   5 5.83768 21.3320   2
 -14   7   5 53.0835 26.2550   1
  -7  14  -5 32.9021 21.7165   2
 -14  -7  -5 22.9027 22.3688   2
 -14  -7  -5 -16.525 18.2974   3
   7  14   5 20.2506 29.6510   2
   7 -14  -5 19.2816 20.7633   4
  -7 -14   5 10.7338 20.9172   2
  -7  14  -5 12.0983 29.6382   1
  14  -7   5 0.39655 21.4056   4
   7  14   5 -7.8950 20.2574   5
  -7  14  -5 6.24024 18.5814   5
  -7 -14   5 -27.793 19.3445   3
  14  -9  -5 19.9689 26.7085   4
  -9  14   5 -18.982 13.5621   2
 -14  -9   5 -6.8210 18.3484   3
  -9 -14  -5 -10.239 27.6004   2
   9  14  -5 -8.5677 26.6875   2
 -14   9  -5 15.9435 13.4410   2
 -14  -9   5 -13.495 17.9467   2
  -9  14   5 -16.862 13.6033   5
  -9 -14  -5 5.74589 26.6814   3
   9 -14   5 37.4410 25.6079   4
 -14   9  -5 -63.583 26.9680   1
 -14   9  -5 8.47180 10.9480   5
  -9 -14   5 -7.4059 22.4063   2
  -9  14  -5 5.66392 18.2835   2
  -9 -14   5 -9.1759 25.7782   3
  -9  14  -5 -39.859 18.0205   5
  -9  14  -5 -19.786 24.2154   1
 -14   9   5 -23.937 18.7906   1
   9  14   5 -32.477 20.9407   2
 -14  -9  -5 -23.526 17.3508   2
 -14  -9  -5 6.12955 16.3459   3
   9 -14  -5 -0.9771 21.4378   4
  14  -9   5 -7.5792 26.7290   4
 -15   0  -5 6.94947 16.3997   2
   0  15   5 28.3633 20.6257   1
   0  15   5 -18.435 22.8530   2
   0  15  -5 -31.646 14.5832   5
   0 -15  -5 11.8236 18.9122   3
 -15   0   5 3.43001 12.3590   2
   0  15   5 -4.1623 21.0298   5
   0  15  -5 -25.023 23.1550   1
   0 -15  -5 -9.9271 21.0000   2
   0 -15   5 32.8044 24.1626   2
  15   0   5 2.82136 18.8979   4
   0 -15   5 -24.890 21.1624   3
   0  15  -5 12.2520 21.0662   2
 -15  -2   5 39.6642 16.7818   3
   2  15  -5 41.8178 24.8512   2
  -2  15   5 18.7301 20.7432   5
  15   2   5 52.1989 23.8632   4
 -15   2  -5 31.1103 19.1448   2
  -2 -15  -5 43.8609 23.0777   2
 -15   2  -5 41.1964 17.7017   5
  -2  15   5 18.7642 19.6280   1
   2 -15   5 13.6131 17.8332   3
  15  -2  -5 17.8470 22.0162   4
   2  15  -5 9.45934 22.6859   5
  -2 -15  -5 16.0047 24.9411   3
  -2  15   5 38.8530 23.8054   2
   2 -15   5 29.5821 18.7871   4
   2  15  -5 35.1199 22.4575   1
 -15  -2   5 40.3707 16.7341   2
  -2 -15   5 28.0866 23.2692   2
  -2  15  -5 -15.099 25.3929   1
   2  15   5 23.4724 22.6234   2
  15  -2   5 41.4024 22.5005   4
 -15  -2  -5 19.0914 16.9845   2
  -2  15  -5 12.0821 20.8316   5
 -15   2   5 8.58974 12.5787   2
  -2 -15   5 45.5237 21.0802   3
  -2  15  -5 25.6782 20.5394   2
   2  15   5 -22.218 21.0566   5
  15  -4  -5 -48.921 18.8278   4
  -4  15   5 4.38428 18.0206   5
  -4 -15  -5 24.8207 25.8500   3
 -15   4  -5 -7.4476 29.0674   1
 -15   4  -5 7.30739 11.1183   5
 -15  -4   5 4.79933 15.7208   2
   4 -15   5 54.6063 23.4255   4
   4  15  -5 2.79837 22.5492   2
 -15  -4   5 -1.2776 19.5872   3
 -15   4  -5 -19.555 14.2798   2
  -4 -15  -5 -18.473 20.2745   2
  -4  15   5 15.2228 20.6610   2
   4  15  -5 -0.8193 21.3372   5
  -4 -15   5 -20.454 18.7173   3
 -15  -4  -5 7.03210 15.9728   3
  15  -4   5 2.52046 20.6979   4
   4  15   5 -15.797 26.1039   2
   4  15   5 36.0871 23.5694   5
  -4  15  -5 -17.776 19.2063   5
 -15  -4  -5 -26.941 17.0594   2
  -4  15  -5 -20.737 22.1079   2
  -4 -15   5 -2.2054 24.8893   2
  -4  15  -5 -11.319 25.5102   1
 -15  -6   5 25.7655 20.4358   3
  -6 -15  -5 1.38931 22.3137   3
  15  -6  -5 -23.313 20.8876   4
   6  15  -5 -20.287 21.6909   2
  -6  15   5 -19.628 15.6121   5
   6  15  -5 37.0009 22.4245   5
   6 -15   5 24.4347 19.7738   4
 -15   6  -5 11.7282 11.8758   2
  -6  15   5 10.1873 19.5190   2
 -15  -6   5 2.56511 18.6911   2
 -15   6  -5 49.8917 31.5120   1
  -6 -15  -5 19.7704 27.4398   2
 -15   6  -5 16.1251 11.1294   5
  -6 -15   5 2.59202 20.3010   3
   6  15   5 -31.007 21.5347   2
 -15  -6  -5 -7.7155 20.2511   2
  15  -6   5 -36.095 20.1444   4
   6  15   5 -9.3538 21.2761   5
  -6 -15   5 -0.1583 22.9701   2
  -6  15  -5 -2.6318 19.8247   5
 -15   6   5 5.44459 23.8217   1
 -15  -6  -5 -23.783 16.4049   3
  -6  15  -5 7.31133 20.6594   2
  -6  15  -5 -33.384 19.4997   1
  -8 -15  -5 60.9650 29.2977   3
  15  -8  -5 -68.607 24.5167   4
  -8  15   5 -28.473 19.0086   2
 -15  -8   5 15.1798 21.4924   3
   8  15  -5 86.5606 32.1744   2
 -15   8  -5 1.53876 25.6679   1
   8 -15   5 38.6589 24.6198   4
 -15  -8   5 8.84056 22.2058   2
  -8 -15  -5 28.6736 29.6991   2
 -15   8  -5 24.5764 13.8231   5
  -8  15   5 -3.2527 17.9023   5
 -15  -8  -5 23.3045 20.8171   3
  -8  15  -5 44.6375 31.4896   1
  -8  15  -5 7.13204 19.2086   5
  -8 -15   5 3.67407 28.1727   2
   8 -15  -5 -1.2680 20.1939   4
   8  15   5 3.98454 24.2439   2
 -15   8   5 29.4578 26.7670   1
  15  -8   5 -33.513 21.7983   4
  -8  15  -5 24.2887 21.6291   2
 -15  -8  -5 61.1596 25.7704   2
  -8 -15   5 10.1657 21.6738   3
   1 -16   5 38.0518 19.4277   3
  16   1   5 9.40759 24.8152   4
   1  16  -5 14.7953 23.0692   5
   1  16  -5 46.5960 24.0968   2
   1  16  -5 -12.885 24.7889   1
  16  -1  -5 38.6812 27.4241   4
  -1  16   5 22.5202 22.8841   5
 -16  -1   5 16.1062 13.7850   2
  -1 -16  -5 -17.500 17.8703   2
  -1 -16  -5 -5.1452 19.3301   3
  -1  16   5 11.2318 20.3944   2
 -16   1  -5 -8.0772 17.1333   2
   1  16   5 -0.5998 22.6606   2
   1  16   5 12.9742 22.8998   5
  -1  16  -5 41.0662 28.2396   1
 -16   1   5 13.8334 13.1135   2
  -1  16  -5 33.7088 23.4385   5
 -16  -1  -5 19.0491 15.6632   2
  16  -1   5 -17.198 19.4476   4
  -1  16  -5 14.0321 27.6337   2
   1  16   5 -25.978 19.9895   1
  -1 -16   5 57.6032 23.8407   2
  -1 -16   5 1.34626 23.3905   3
  -3  16   5 -5.2045 16.1535   5
  -3  16   5 19.4788 22.9714   2
 -16   3  -5 10.3181 15.5871   5
 -16   3  -5 -47.499 26.8078   1
   3  16  -5 -38.132 24.6593   1
 -16   3  -5 -26.900 16.6778   2
   3  16  -5 74.9428 29.8291   2
  16  -3  -5 13.2441 21.7179   4
  -3 -16  -5 14.3888 24.9908   2
  -3 -16  -5 22.0254 27.2517   3
 -16  -3   5 15.2174 15.0146   2
   3  16  -5 -30.773 20.0949   5
  16  -3   5 37.0270 27.6199   4
   3  16   5 19.8525 24.3266   5
   3  16   5 30.0419 28.8197   2
  -3 -16   5 -19.904 26.1636   2
  -3  16  -5 -26.862 24.4478   1
  -3 -16   5 13.0913 24.9434   3
  -3  16  -5 38.2880 22.3082   5
  -3  16  -5 16.0246 20.3736   2
 -16  -3  -5 4.14789 17.4162   2
   5  16  -5 -15.475 23.2281   2
  -5  16   5 -11.641 18.6328   5
   5  16  -5 7.64807 22.4140   5
 -16   5  -5 0.83699 11.9581   5
  -5 -16  -5 -21.912 23.8222   3
 -16   5  -5 -4.5014 25.4300   1
  -5  16   5 8.13951 20.9670   2
  16  -5  -5 33.7451 29.0561   4
  -5 -16  -5 -9.8601 27.0453   2
 -16  -5   5 -6.2704 20.5111   3
 -16  -5   5 -28.621 15.3874   2
 -16   5   5 15.9333 22.9143   1
  -5  16  -5 61.2362 28.4158   1
 -16  -5  -5 -2.1128 19.3993   2
  -5 -16   5 -23.129 22.6369   2
  -5 -16   5 -13.660 24.4569   3
   5  16   5 18.4752 23.1013   5
  -5  16  -5 -3.2381 22.5557   2
  16  -5   5 26.6251 22.3671   4
   5  16   5 -45.849 20.4971   2
  -5  16  -5 -14.139 20.7503   5
   7  16  -5 49.0513 31.4738   2
  -7  16   5 23.3280 20.0258   5
  16  -7  -5 10.3881 28.3222   4
 -16   7  -5 13.6009 30.2457   1
 -16  -7   5 -5.9038 20.6093   3
  -7 -16  -5 19.5848 23.8136   3
   7 -16   5 7.89276 20.3913   4
  -7  16   5 -11.309 19.4908   2
 -16  -7   5 29.4757 21.2571   2
  -7 -16  -5 -7.8294 26.8028   2
  -7 -16   5 6.15448 28.5990   2
  16  -7   5 8.86288 27.7160   4
  -7  16  -5 -28.127 20.5784   2
 -16  -7  -5 -32.482 19.5481   2
 -16   7   5 -41.590 19.2958   1
  -7  16  -5 2.42117 27.8889   1
   7  16   5 -13.793 29.5031   2
  -7  16  -5 8.68093 20.6121   5
  -7 -16   5 -6.1965 25.9640   3
 -16  -7  -5 29.7713 20.1331   3
   7  16   5 -12.349 21.0772   5
   0  17   5 -22.230 19.9216   2
   0  17   5 -20.767 20.7886   5
   0  17  -5 26.0133 26.8260   2
 -17   0   5 9.47849 12.8852   2
 -17   0  -5 -4.3633 16.9479   2
   0  17  -5 -3.4069 19.2204   5
   0  17  -5 -34.950 24.9644   1
   0 -17   5 25.5300 22.9936   3
   2  17  -5 -7.5625 23.2989   5
 -17   2  -5 -9.1037 17.3718   2
  -2  17   5 -11.395 23.9842   2
  -2 -17  -5 14.4817 26.2179   2
   2  17  -5 -1.5608 26.2074   1
  -2 -17  -5 47.2304 30.0094   3
  -2  17   5 -12.802 21.5465   5
   2 -17   5 -24.299 19.8951   3
 -17  -2   5 16.0592 15.3565   2
   2  17  -5 -31.462 28.2224   2
 -17   2  -5 44.8856 28.5396   1
  17   2   5 -0.1218 24.0279   4
  17  -2  -5 29.1961 22.9932   4
   2  17   5 32.5083 28.3544   2
 -17  -2  -5 -25.003 16.4885   2
  -2 -17   5 -10.363 22.6789   3
  -2 -17   5 -21.061 25.3247   2
  -2  17  -5 1.47737 25.1328   2
  17  -2   5 -47.852 24.4237   4
  -2  17  -5 -24.841 20.7178   5
  -2  17  -5 7.72760 25.6965   1
   2  17   5 -36.994 16.3012   5
  -4 -17  -5 6.66476 22.2624   2
 -17  -4   5 22.1060 18.7068   2
   4  17  -5 18.8692 24.7146   2
  -4 -17  -5 5.91251 27.5570   3
  -4  17   5 -8.7070 21.6494   5
   4  17  -5 51.0065 25.1588   5
  17  -4  -5 12.0916 22.8262   4
 -17   4  -5 -11.995 30.3431   1
 -17   4  -5 21.3323 15.9896   5
  -4  17   5 28.6218 23.7884   2
 -17   4   5 -12.747 24.4666   1
  -4  17  -5 -27.746 23.6972   1
  -4  17  -5 -32.044 23.6285   2
  -4 -17   5 -11.593 24.8656   3
  17  -4   5 23.2701 28.3254   4
  -4 -17   5 22.6491 24.3364   2
   4  17   5 -3.6757 23.5136   5
 -17  -4  -5 -9.1079 20.9389   2
   4  17   5 -18.346 22.3167   2
  -4  17  -5 -6.4334 18.4181   5
   0   0   6 -1.0018 4.84143   5
   0   0  -6 1.10273 6.89973   1
   0   0   6 2.87811 6.49372   2
   0   0   6 5.32462 8.88995   2
   0   0  -6 -1.2013 10.2581   2
   0   0  -6 -20.481 6.17566   2
   0   0   6 -3.0909 4.96390   1
   1  -1   6 172.390 17.3035   2
  -1  -1   6 154.237 15.9758   2
  -1   1  -6 183.797 18.6645   1
  -1   1   6 166.804 12.8565   2
  -1  -1   6 161.747 14.7307   3
  -1   1  -6 149.438 18.0004   2
  -1  -1  -6 153.618 15.9145   2
   1  -1  -6 167.266 14.1133   2
   1   1   6 177.195 15.8286   2
   1   1  -6 178.965 16.1535   2
   1   1  -6 95.2607 11.6864   5
   2   0   6 9.27698 8.19443   5
   0   2  -6 7.57905 7.27154   5
  -2   0   6 14.3021 6.66549   2
   0   2  -6 14.6522 12.1575   2
   2   0  -6 2.59127 4.36795   2
  -2   0  -6 -11.154 9.00933   2
   0   2   6 6.51353 10.4112   2
   0  -2   6 18.5841 9.97148   3
  -2   0  -6 -0.0389 11.9407   2
   0  -2  -6 0.81710 4.09414   1
  -2   0  -6 -9.0838 6.64706   5
   2   0   6 2.56149 12.1229   2
   0   2   6 4.83914 8.10236   2
   0   2  -6 12.4288 12.5535   1
   0  -2  -6 8.27831 9.14903   2
  -2   0   6 14.8093 7.50559   2
   2   0  -6 26.5932 8.17172   2
   0  -2   6 16.6437 7.26809   5
   0  -2   6 30.0081 12.7002   2
   2   0   6 4.69216 9.58718   4
   0   2  -6 -3.6507 8.15223   3
  -2   2   6 3.34858 6.81706   2
   2   2  -6 -1.0204 8.27372   5
  -2  -2   6 -5.4694 9.32753   2
   2  -2   6 -3.9289 7.30831   5
  -2   2   6 2.40439 6.67676   2
  -2   2  -6 -0.2237 13.5747   2
  -2  -2  -6 -2.9374 11.6695   3
  -2  -2   6 -12.515 12.7469   3
  -2  -2  -6 -6.6265 11.6638   2
  -2  -2   6 -6.9839 8.20315   5
  -2   2  -6 -9.3244 13.7884   1
  -2   2   6 6.10473 11.2455   4
  -2   2  -6 -4.2995 7.77774   5
   2   2   6 -2.5203 14.4214   2
   2   2   6 -3.4476 5.90550   4
   2  -2   6 -15.897 9.43063   2
   2  -2  -6 -5.2964 3.05453   2
  -2   2  -6 -10.571 5.53452   3
   2   2   6 -10.732 9.15316   3
   2  -2  -6 -9.0753 11.5218   4
  -2   2  -6 0.50641 12.1646   2
   2   2  -6 -5.2516 12.3791   2
   2  -2   6 -6.0508 5.54952   3
   2   2  -6 -13.983 12.7879   1
   1  -3   6 2195.37 88.5114   3
  -3  -1   6 2361.90 89.3040   2
  -1   3   6 2146.43 88.0430   4
   1   3  -6 2300.73 95.7122   1
  -1   3   6 2314.73 90.4455   2
  -3   1  -6 2223.77 87.5476   5
  -3  -1   6 2264.37 91.9780   3
  -1  -3  -6 2233.14 91.8471   3
   3   1   6 2258.50 89.5643   4
  -1  -3  -6 2250.56 92.5659   2
  -1   3   6 2237.11 90.1084   2
  -3  -1   6 2347.19 86.0458   5
  -3   1  -6 2299.47 96.3067   2
   3  -1  -6 2267.24 92.2933   4
   1   3  -6 2262.80 90.5778   5
  -3   1  -6 2272.92 94.0898   2
  -3   1  -6 2366.99 92.9955   4
   1   3  -6 2271.19 92.9260   2
   1  -3   6 2169.54 91.8132   2
  -1   3   6 2247.05 85.9538   1
   3   1   6 2401.83 88.9787   3
  -3   1  -6 2110.78 92.9157   1
   3   1   6 2192.12 91.7265   2
  -3   1   6 2205.15 84.5513   2
  -3  -1  -6 2182.02 91.7808   2
   1   3   6 2325.59 93.5565   2
   1  -3  -6 2308.30 86.0087   1
  -1  -3   6 2182.86 91.4598   3
  -3   1   6 2070.04 85.4786   2
   1  -3  -6 2071.94 87.7009   4
  -1   3  -6 2194.00 96.8988   1
   1  -3  -6 2126.48 89.6415   2
   3  -1   6 2288.83 85.6420   5
  -3  -1  -6 2288.77 88.6046   3
  -3  -1  -6 2354.61 89.9854   4
  -3   1   6 2335.37 92.9442   4
  -1   3  -6 2126.42 89.1716   5
   3   1  -6 2311.96 88.8696   2
  -1   3  -6 2393.01 89.0587   3
  -1   3  -6 2154.98 92.4081   2
   3  -1   6 2095.07 93.1471   2
  -3  -1  -6 2371.41 93.4124   2
   3  -1   6 2143.28 91.8037   4
   3  -3   6 186.518 11.6807   5
  -3   3   6 174.990 19.1188   4
  -3   3  -6 178.640 22.7021   2
  -3   3   6 178.184 14.9239   2
  -3  -3   6 167.608 21.4262   2
  -3  -3  -6 181.288 20.7155   3
  -3   3  -6 164.593 12.1667   3
   3  -3   6 181.960 12.4527   3
   3   3  -6 191.196 17.7928   5
  -3   3   6 200.934 20.7876   1
  -3   3  -6 168.877 21.3951   2
  -3  -3  -6 163.727 13.6012   4
  -3   3   6 168.743 13.8077   2
   3   3  -6 181.226 22.2996   2
  -3   3  -6 175.146 15.3516   5
   3   3   6 164.897 13.5841   4
  -3  -3  -6 202.775 24.0753   2
  -3  -3   6 197.649 22.7083   3
  -3  -3   6 195.067 19.2240   5
   3  -3  -6 181.862 13.2658   2
   3   3   6 186.987 24.1140   2
   3  -3   6 174.228 21.1142   2
   3  -3   6 164.680 21.8594   4
   3   3  -6 197.574 26.4825   1
  -3   3  -6 202.390 23.9131   1
   3  -3  -6 197.395 22.8819   4
   0   4  -6 11.6224 20.4042   1
  -4   0  -6 15.7876 10.8831   5
   0  -4   6 35.7783 14.2096   3
   4   0   6 -4.9117 15.1819   2
  -4   0  -6 12.8267 11.6532   2
   4   0   6 14.9122 7.41041   3
   0   4   6 2.33767 12.0397   2
   4   0  -6 10.7987 6.01476   2
   0   4  -6 22.0383 10.9307   5
   0   4   6 -0.9768 7.95985   1
   4   0   6 2.93849 5.67033   5
  -4   0  -6 -9.3194 12.4928   2
  -4   0   6 26.3769 7.54665   2
  -4   0   6 7.44076 12.7116   3
   0   4   6 17.1742 6.79126   4
  -4   0   6 9.57634 13.7918   4
   0   4  -6 8.14222 13.6825   2
   4   0   6 15.6119 11.7976   4
   0  -4  -6 13.2499 13.3526   3
  -4   0  -6 11.8186 13.7775   4
   0  -4  -6 13.9954 6.94254   4
  -4   0  -6 14.0368 8.04057   3
   0  -4   6 6.20218 12.8303   2
   0  -4  -6 12.9005 12.2025   2
   2   4  -6 123.474 19.3266   2
  -4  -2   6 124.597 16.4896   2
  -2  -4  -6 126.159 20.0074   3
  -4   2  -6 164.748 20.2773   4
   2   4  -6 127.634 20.6564   1
  -4   2  -6 124.141 12.7497   5
   4   2   6 131.346 17.8949   2
  -4   2  -6 132.597 20.3371   1
  -4   2  -6 119.305 20.8073   2
  -2   4   6 144.012 17.9840   1
   2   4  -6 128.507 15.7233   5
  -4   2  -6 175.567 21.3546   2
   2  -4   6 134.559 16.6878   3
   4   2   6 135.503 16.3868   5
  -4  -2   6 123.120 14.2562   5
  -2   4   6 97.9905 14.4762   2
   4   2   6 116.160 14.5557   4
  -2   4   6 117.385 15.4671   2
  -4  -2   6 154.547 18.2041   2
   2  -4   6 116.350 19.0364   2
  -4  -2   6 117.545 19.2893   3
  -2   4   6 99.2860 15.2951   4
   4  -2  -6 117.983 19.6243   4
  -2  -4  -6 111.945 18.6608   2
  -2   4  -6 99.8884 18.3299   2
   4   2  -6 136.752 17.1642   2
   4   2  -6 134.985 9.53363   5
  -2   4  -6 127.497 15.3067   5
   2  -4  -6 119.406 15.2533   4
  -2  -4   6 139.921 19.0966   2
   4  -2   6 119.564 20.0948   4
   2  -4  -6 121.218 16.7222   2
  -2  -4   6 156.659 18.8914   3
  -4  -2  -6 131.442 16.1920   4
   2   4   6 118.058 19.4301   2
  -2   4  -6 114.150 27.1124   1
  -4  -2  -6 131.465 17.4865   2
  -4  -2  -6 135.560 16.5829   3
   4  -2   6 118.091 15.9040   2
  -2   4  -6 139.672 16.8301   3
  -4   2   6 146.887 19.7835   4
  -4   4   6 -3.3079 11.0519   1
  -4   4  -6 -1.6952 6.50585   3
  -4   4  -6 -2.9760 15.9701   1
  -4   4   6 -4.1374 7.50590   2
  -4  -4  -6 -0.5385 15.0173   3
  -4  -4  -6 -4.6519 8.19705   4
   4   4   6 -14.528 16.7278   2
  -4   4   6 -2.3382 7.91837   2
   4   4  -6 0.74309 9.72725   5
   4   4  -6 -0.5188 13.3823   2
  -4  -4   6 -3.9810 12.6668   2
   4   4   6 -13.876 7.21719   4
  -4   4  -6 0.76554 12.7232   2
   4   4   6 9.32468 13.1569   5
  -4   4  -6 1.01135 8.53650   5
  -4  -4  -6 -14.995 16.7195   2
   4  -4  -6 1.60347 12.3773   4
   4  -4   6 1.45761 11.8922   2
   4  -4   6 -20.292 15.7569   4
  -4   4  -6 13.4330 12.8008   2
  -4  -4   6 -1.7172 16.6238   3
   4  -4  -6 3.18362 6.38630   2
   5   1   6 71.5355 12.5567   3
  -5   1  -6 51.6670 9.78324   5
  -5   1  -6 58.6355 7.91978   3
  -1   5   6 84.7745 12.4334   4
   1   5  -6 86.6776 19.4910   1
  -1  -5  -6 67.4394 16.7158   2
  -5  -1   6 62.5932 6.91243   5
  -5  -1   6 58.5840 11.7627   2
  -1  -5  -6 84.5780 16.5338   3
   5   1   6 78.5606 16.8554   4
  -5  -1   6 64.2759 13.2355   2
   5  -1  -6 61.7293 16.5485   4
   5   1   6 71.7667 16.6668   2
   1   5  -6 51.4247 16.8242   2
  -1   5   6 57.3665 14.2582   2
  -5   1  -6 75.6440 17.3707   2
   1   5  -6 81.3597 16.6948   5
  -1   5   6 68.5506 11.4259   1
  -1  -5  -6 62.0401 7.08725   4
   1  -5   6 63.6386 12.8448   3
   1  -5   6 55.5914 15.6737   2
  -5  -1   6 62.9267 15.9641   3
  -5   1  -6 74.3580 15.6885   2
   5  -1   6 35.8537 16.5490   2
   1   5   6 68.9243 17.0547   2
  -5   1   6 62.7095 7.14730   2
  -5  -1  -6 91.9278 14.6345   4
  -1  -5   6 50.6995 14.9324   3
  -1  -5   6 65.9332 17.6355   2
  -5   1   6 60.6671 13.8191   3
   5   1  -6 67.6436 9.62831   2
  -5  -1  -6 72.5665 12.1780   3
  -5   1   6 59.8747 6.67211   2
  -1   5  -6 54.5708 14.5831   5
  -5  -1  -6 41.2351 16.0583   2
   1  -5  -6 45.6769 13.3924   2
   1  -5  -6 62.7448 11.7021   4
  -1   5  -6 72.7027 16.7564   2
   5  -1   6 65.0386 7.57545   3
   5  -1   6 58.3029 15.3225   4
  -1   5  -6 83.1819 20.8840   1
  -3  -5  -6 159.509 21.0518   3
  -5  -3   6 186.260 23.5432   3
   3  -5   6 190.231 23.8982   4
   3   5  -6 177.020 24.3438   1
  -5  -3   6 172.467 17.6578   5
   5   3   6 179.960 23.8823   2
  -5   3  -6 222.034 26.3474   2
  -3   5   6 181.546 23.4600   1
   5  -3  -6 152.627 21.2855   4
  -3   5   6 207.816 19.5712   2
  -5   3  -6 167.847 23.9552   1
  -5  -3   6 218.223 25.1084   2
   3   5  -6 158.274 19.5150   5
   3  -5   6 157.045 17.8212   3
  -3   5   6 196.731 21.0362   2
  -3  -5  -6 174.099 25.3607   2
  -5   3  -6 194.982 24.8339   2
  -3   5   6 174.106 20.5032   4
  -5   3  -6 184.736 13.5592   5
  -3  -5  -6 184.958 11.1799   4
   3   5  -6 174.887 25.1530   2
   5   3   6 173.589 18.9021   4
   5   3   6 164.123 18.3065   5
   3   5   6 172.462 20.6708   5
  -3   5  -6 182.780 18.4155   3
  -3   5  -6 117.761 28.3024   1
  -5  -3  -6 183.327 23.9170   2
  -5  -3  -6 183.484 21.5453   3
   3   5   6 230.252 27.0302   2
   5  -3   6 178.678 22.7419   4
  -5  -3  -6 192.014 19.3081   4
  -5   3   6 176.416 10.3926   2
   5   3  -6 173.747 20.8575   2
  -3   5  -6 158.235 21.0851   2
  -5   3   6 156.957 10.1856   2
   3  -5  -6 172.740 22.0744   4
   5  -3   6 217.021 19.3022   2
  -3   5  -6 147.861 18.2760   5
  -3  -5   6 177.584 22.7082   3
   3  -5  -6 168.118 18.4313   2
  -3  -5   6 223.236 26.0394   2
  -5   5  -6 203.980 23.2514   2
  -5  -5  -6 214.635 28.1123   2
  -5   5   6 195.291 17.1613   2
   5   5   6 199.000 26.9746   2
  -5  -5   6 212.064 26.3538   2
  -5   5  -6 219.492 18.2862   5
   5   5  -6 232.768 20.6594   5
   5   5   6 224.753 21.5543   5
  -5   5  -6 214.407 27.9849   1
  -5   5  -6 255.169 16.1974   3
  -5   5   6 234.576 25.5496   1
  -5  -5  -6 249.974 19.2937   4
  -5  -5  -6 210.138 25.2496   3
   5  -5   6 231.743 30.2868   4
  -5   5  -6 205.880 23.6946   2
  -5  -5   6 238.056 29.7824   3
   5  -5  -6 221.465 14.7454   2
  -5   5   6 228.706 17.4119   2
   5  -5  -6 207.926 27.9228   4
   5   5  -6 244.286 27.9241   2
  -6   0  -6 91.6728 16.5296   2
  -6   0   6 103.665 13.3712   2
   6   0   6 78.2307 16.5950   4
   0  -6   6 126.222 19.2820   3
  -6   0   6 75.9325 14.9638   3
   6   0  -6 79.5424 18.3233   4
   0   6  -6 78.1202 20.2368   1
   0   6   6 129.952 15.7151   1
  -6   0   6 88.7484 10.9733   2
   0   6   6 90.1683 20.2738   2
   6   0   6 113.934 21.0457   2
   6   0  -6 115.524 11.7309   2
  -6   0  -6 107.734 16.8670   2
   0   6  -6 87.5717 18.4645   2
   0  -6  -6 97.5847 17.8848   2
   0  -6  -6 88.8311 10.8589   4
   0  -6  -6 98.9036 18.2631   3
   0  -6   6 76.9027 21.1769   2
  -6   0  -6 114.681 15.2884   5
   0   6  -6 79.3559 15.5905   5
   6   0   6 100.847 12.5354   3
  -6   0  -6 99.9819 12.6982   3
   6  -2  -6 84.3103 19.2592   4
   2   6  -6 57.8798 19.7791   1
  -2   6   6 97.9906 14.6259   1
  -2   6   6 64.4301 16.7300   2
  -6  -2   6 111.608 17.3308   3
  -2  -6  -6 108.128 20.5646   2
   6   2   6 48.3806 8.44590   5
  -2  -6  -6 74.7386 18.0448   3
  -6   2  -6 53.1008 19.5817   2
  -6   2  -6 79.4463 19.4527   1
   2  -6   6 73.3542 14.9518   3
   6   2   6 72.4193 16.5571   4
   2   6  -6 101.509 16.6011   5
   2   6  -6 104.890 19.9322   2
  -2   6   6 63.4000 13.7030   4
  -6  -2   6 64.2478 15.1928   2
  -6  -2   6 71.4887 15.1203   2
   6   2   6 55.0712 17.1152   2
  -6   2  -6 93.7207 18.8664   2
  -6  -2   6 96.5459 12.1579   5
   2  -6   6 118.455 17.9493   2
  -6   2  -6 80.4376 10.3392   5
   2  -6  -6 91.4196 16.5206   2
   2   6   6 93.1224 22.4680   2
  -2   6  -6 50.1779 16.5395   2
   6  -2   6 76.1097 14.6508   2
   2  -6  -6 72.7044 13.8014   4
  -2  -6   6 113.462 20.4752   3
   6   2  -6 78.7603 14.0945   2
   6  -2   6 75.3227 18.2139   4
   2   6   6 108.737 16.3550   5
  -6  -2  -6 91.6279 16.9929   4
  -2   6  -6 31.5598 24.5650   1
  -6  -2  -6 48.4120 14.0566   3
  -6  -2  -6 54.3667 17.3547   2
  -2  -6   6 62.2266 20.8702   2
  -2   6  -6 100.465 16.7780   5
   4  -6   6 24.4631 13.4464   2
  -4  -6  -6 -3.1318 6.29027   4
   6   4   6 -6.5882 9.87720   5
  -4  -6  -6 11.5722 14.8108   3
   4   6  -6 28.6088 20.0008   2
   4   6  -6 -8.3498 12.3115   5
  -4   6   6 -4.4310 10.0682   2
   4  -6   6 -12.415 9.40571   3
  -6  -4   6 -7.4806 14.9360   2
  -4   6   6 10.0829 9.89212   2
  -6   4  -6 9.80345 20.7539   1
   4   6  -6 -7.5551 16.5373   1
   6  -4  -6 8.34311 14.4185   4
  -6   4  -6 -1.9490 11.8635   2
   6   4   6 -4.4646 12.0983   4
  -6   4  -6 -0.8208 12.0144   2
   6   4   6 -12.916 12.8751   2
   4  -6   6 -23.277 12.7503   4
  -6  -4   6 -0.9796 16.0153   3
  -6   4  -6 10.4858 6.83336   5
  -4   6   6 -2.0019 14.5279   1
  -4  -6  -6 -11.580 15.0528   2
  -6   4   6 16.4878 13.2836   1
  -6   4   6 -2.3930 5.20978   2
   6   4  -6 -0.8891 5.91566   5
  -4   6  -6 -29.888 17.5577   1
   4   6   6 -4.3340 18.8326   2
  -4  -6   6 22.2913 18.7945   2
  -6  -4  -6 21.1970 17.6733   2
   6  -4   6 -2.2047 9.73242   2
   4   6   6 -12.202 13.7371   5
   6  -4   6 13.3730 14.8832   4
  -6  -4  -6 -14.354 14.6015   3
   6   4  -6 4.64622 15.0334   2
   4  -6  -6 -2.7836 7.52583   2
  -4   6  -6 9.33333 11.6238   5
  -4   6  -6 2.47533 11.3500   2
  -6   4   6 -8.1123 5.10892   2
  -6  -4  -6 32.0794 12.8188   4
   4  -6  -6 10.3978 14.6032   4
  -4  -6   6 18.4866 17.6289   3
  -6   6  -6 11.8145 12.3266   2
  -6   6   6 3.53080 8.32837   2
  -6  -6  -6 -2.2553 15.1419   2
   6  -6   6 22.3140 18.8082   4
  -6   6  -6 -29.857 16.9913   1
   6   6  -6 -19.423 13.1166   2
   6   6   6 -5.4942 12.7304   5
  -6  -6  -6 8.68192 9.98869   4
   6   6  -6 18.5233 12.2987   5
   6  -6  -6 -6.1077 13.9159   4
  -6  -6  -6 -10.021 17.0740   3
  -6   6   6 -7.9079 13.9554   1
   6  -6   6 3.32630 11.5244   2
  -6   6  -6 -6.0801 7.08920   3
  -6  -6   6 16.7385 18.8713   3
  -6   6  -6 9.75334 12.8618   2
   6   6   6 30.8050 19.4454   2
  -6   6  -6 -3.4426 8.75270   5
  -6  -6   6 -9.5566 17.8768   2
  -1   7   6 77.9122 14.7404   1
   7   1   6 85.7958 17.2230   4
  -7   1  -6 61.1867 15.1929   2
  -1  -7  -6 68.8019 8.53994   4
  -7  -1   6 63.3773 16.1133   3
   7   1   6 100.296 17.7630   2
  -7  -1   6 73.4720 7.17829   5
  -1   7   6 82.2438 16.7930   2
   1  -7   6 66.3321 19.6540   2
   1   7  -6 107.457 21.2457   2
  -7   1  -6 97.8368 16.1176   2
   7  -1  -6 64.6154 18.5059   4
   1   7  -6 51.5485 19.4273   1
  -7   1  -6 62.7831 8.82682   3
  -7   1  -6 76.7541 10.6924   5
   1   7  -6 78.5719 16.6011   5
  -1  -7  -6 112.956 22.6554   2
   1  -7   6 85.9524 17.7421   3
  -7  -1   6 108.365 15.2257   2
  -7  -1   6 72.3793 13.1659   2
  -1  -7  -6 88.9239 21.5674   3
   7  -1   6 92.5270 11.9099   3
  -7   1   6 86.9305 10.3882   2
   7  -1   6 51.9480 16.7305   4
  -1   7  -6 90.3310 17.5679   5
   7  -1   6 52.0231 17.5381   2
  -7  -1  -6 83.4883 15.9232   2
  -7   1   6 84.8639 10.5232   2
  -7   1   6 70.7223 13.9864   3
   1  -7  -6 50.8410 12.3561   4
   1   7   6 80.1527 19.3051   2
  -7  -1  -6 74.9973 12.7026   3
  -1   7  -6 96.3529 22.4747   1
   1   7   6 69.1221 15.7446   1
  -1  -7   6 70.4009 19.1129   2
   1  -7  -6 110.450 20.0102   2
  -1   7  -6 43.6274 19.9702   2
  -1  -7   6 58.1807 18.9768   3
   7  -3  -6 21.4673 19.1913   4
  -3   7   6 22.5496 12.8702   1
   7   3   6 27.2371 14.0126   2
   3  -7   6 25.0715 16.7487   4
  -7  -3   6 31.5048 9.94683   5
  -3   7   6 7.66893 13.5444   2
   3   7  -6 15.7206 16.3901   2
   3   7  -6 29.7000 13.5169   5
   7   3   6 29.1209 9.18032   5
  -7   3  -6 33.5738 15.7880   2
  -7   3  -6 27.2263 6.73543   5
  -7   3  -6 25.8446 17.9019   1
  -7  -3   6 14.3187 15.8818   3
   3  -7   6 -2.2650 15.1924   2
   3   7  -6 16.3636 17.4913   1
   3  -7   6 -6.3297 10.7054   3
  -7  -3   6 28.7932 14.3609   2
  -3  -7  -6 18.5777 15.5482   3
   7   3   6 40.0942 14.4219   4
  -7   3  -6 -0.5849 17.3073   2
  -3  -7  -6 7.81192 19.4451   2
   3   7   6 19.7556 15.8608   5
   7  -3   6 21.4397 16.0528   4
[truncated: 5,110,353 more chars]
